# Supplementary material for: Comparative Transcriptome Analysis of Two Peach Rootstocks Uncovers the Effect of Gene Differential Expression on Nitrogen Use Efficiency
Source: MDPI journal article supplement (doi:10.3390/ijms231911144), 2022-09-22
Supplement: s1 [file s1]

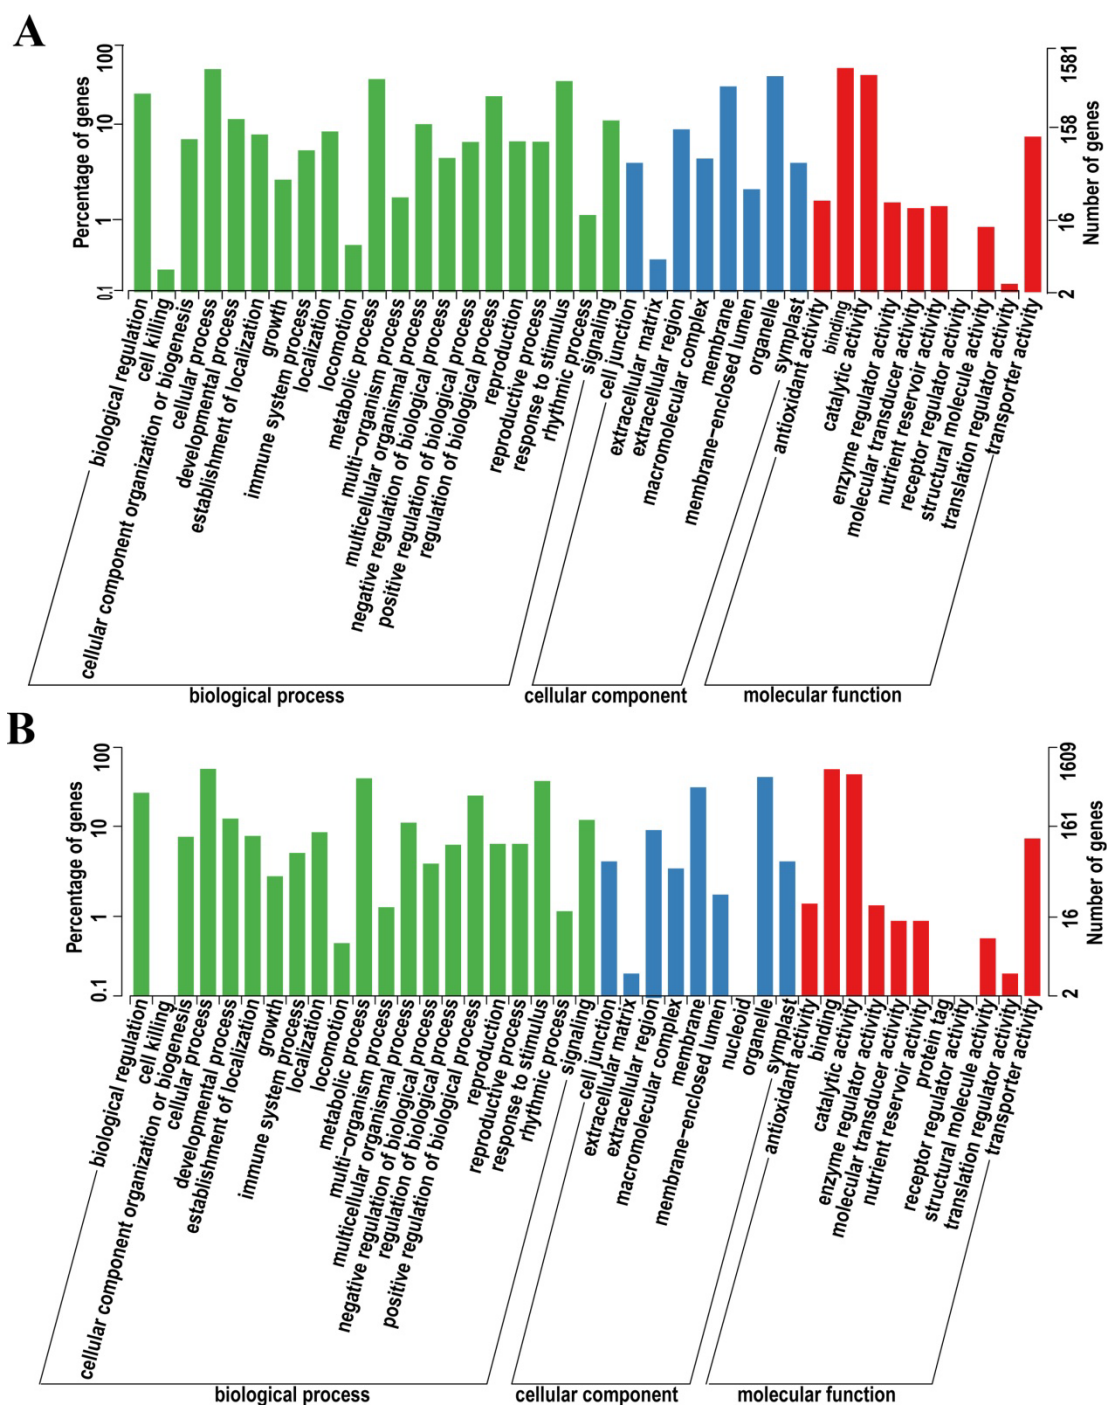

**Figure S1.** Gene ontology categories of the DEGs between the S and M. **(A)** Gene ontology categories of DEGs between S and M treated by 0.1 mM KCL. **(B)** Gene ontology categories of DEGs between S and M treated by 0.1 mM KNO<sub>3</sub>.

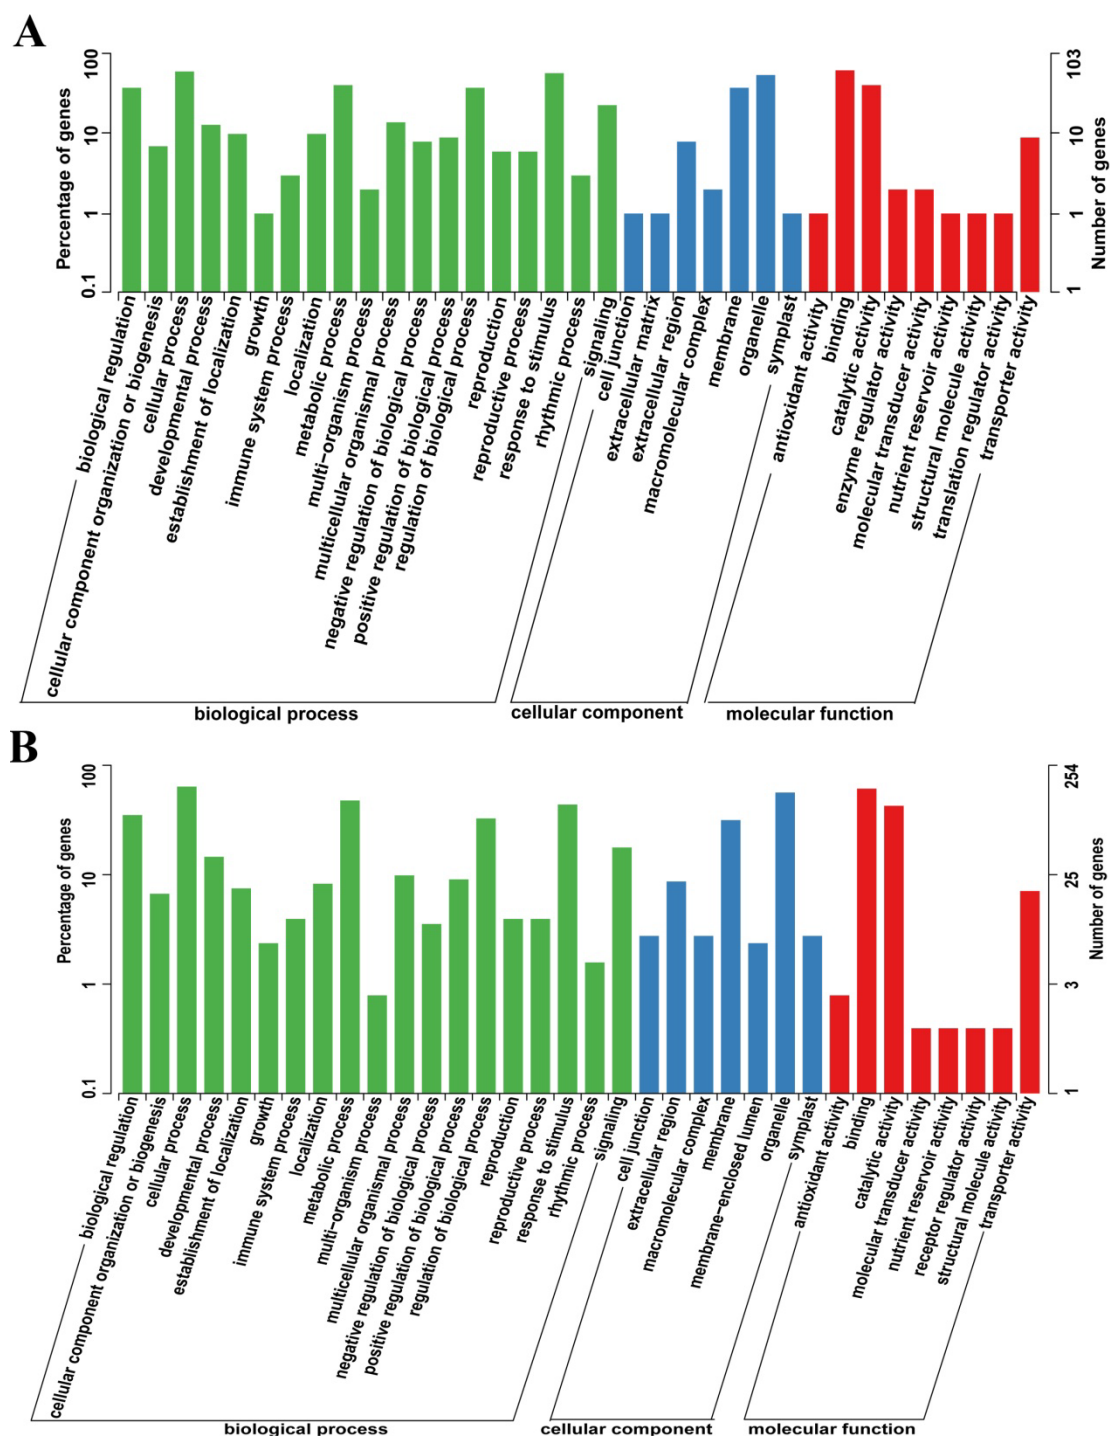

**Figure S2.** Gene ontology categories of the DEGs between different treatments of the same rootstock. (A) Gene ontology categories of DEGs between KNO<sub>3</sub> treatment group and control group of M. (B) Gene ontology categories of DEGs between KNO<sub>3</sub> treatment group and control group of S.

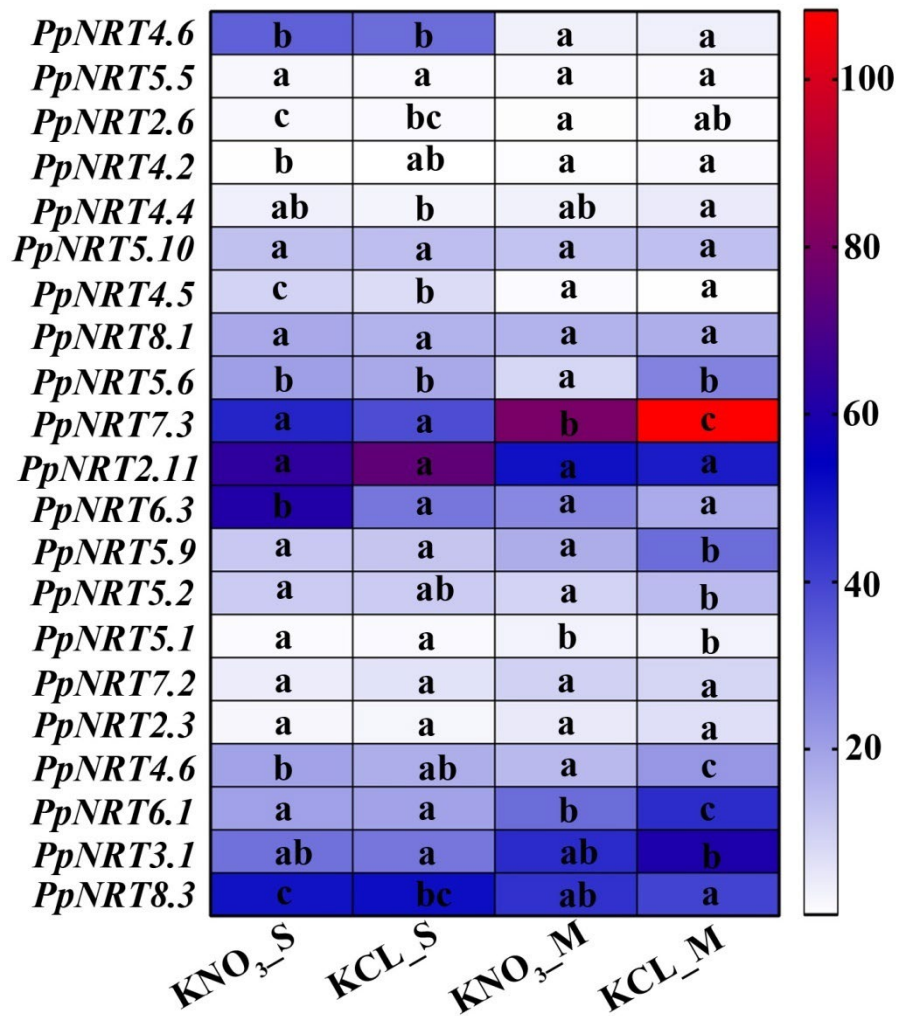

**Figure S3.** The normalized expression level (FPKM) of some differentially expressed *PpNRT1* gene family members in four libraries analyzed by heat map. Different lowercase letters indicate significant differences at  $p < 0.05$  by one-way ANOVA with Duncan(D)'s multiple comparisons test.
