# Supplementary material for: Comparative Transcriptome Analysis of Two Peach Rootstocks Uncovers the Effect of Gene Differential Expression on Nitrogen Use Efficiency
Source: MDPI journal article supplement (doi:10.3390/ijms231911144), 2022-09-22
Supplement: s1 [file s1]

**Table S2.** Primers used in the study.

| Primers for qRT-PCR |                              |                              |
|---------------------|------------------------------|------------------------------|
| Primers Name        | Forward Primer (5'–3')       | Reverse Sequence (5'–3')     |
| <i>PpNRT2.9</i>     | TGGGTTTTTCTTCATTCGCTTCTTTTTT | GTTGTTGGCCCTTTACATGTTTCTCCTT |
| <i>PpNRT4.5</i>     | TATACGCCACGGAGGGTCTT         | GGGTGGTAGCCGACTTTGTGTC       |
| <i>PpNRT5.6</i>     | ATCACATCACGGAGAAGGGTGGGAAG   | TGTAAGAGTAACGCCGAGCCAAGAAAAC |
| <i>PpNRT21.</i>     | TCATATCGGGCCTCACTGGA         | GCACACGATCATTACCCCCA         |
| <i>PpNRT2.5</i>     | AGCGTTTCACTTGTCTTGGT         | CAAGCCGCGGTCCAAATAAG         |
| <i>PpNR</i>         | TCGTCCGCTCCTTCAACTTC         | TTAAATCCCCGTA CTGCGG         |
| <i>PpNiR</i>        | CCTCTTGATGCCTGGGTCTC         | CTCGTCTTCTGTGCGGTTCCC        |
| <i>PpGDH1</i>       | TCAAGGGGTTCAATGGTGGG         | TCAGTGGGGTGATTAGCTGC         |
| <i>PpGDH2</i>       | CAAGCCGCAATTTTCGCAAC         | AAGCTTCCATCGTCCTTCGG         |
| <i>PpGS</i>         | GCACAGATTTTGGCACCCAC         | AGCAGAGCTCTTGGTGGTC          |
| <i>PpNAC2</i>       | AGGGACCGGAAGTATCCGAA         | CGGCGTAGAAAACCAAAGCC         |
| <i>PpNAC29</i>      | CAGGAATCCCAAGCACCGAA         | TGTCGGACTGAATCGTTGCG         |
| <i>PpTEF2</i>       | GGTGTGACGATGAAGAGTGATG       | TGAAGGAGAGGGAAGGTGAAAG       |
| <i>AtNR</i>         | CCACGTCCCTAAAGCCCAAT         | TCTGTTCCCTTACGGCGGTTT        |
| <i>AtGS1</i>        | ATGGTGAAGGCAACGAGAGG         | CCTACTCTCACCGATGCTCC         |
| <i>AtACC</i>        | CGGCGACGTTTTCTTCATTC         | GCGGCGTCAACGGTTAATTT         |
| <i>AtEIN3</i>       | CCTGCGAGAATCTTGGGTGT         | TGCTCCATACGGTAAGCGAC         |
| <i>Atactin11</i>    | CCACATGCTATTCTGCGTTTGGACC    | CATCCCTTACGATTTACGCTCTGC     |

| Primers for vector construct |                                                                 |                                                          |
|------------------------------|-----------------------------------------------------------------|----------------------------------------------------------|
| Primers name                 | Forward primer (5'–3')                                          | Reverse sequence (5'–3')                                 |
| <i>1300-PpNRT2.1</i>         | ATTTGGAGAGGAC <u>AGGGTAC</u> -<br><u>CATGGCCGAAGTCGAAGGTGAA</u> | CACCATGGTACTAGT <u>GTCGACA</u> ACATGG-<br>GAAGGTGTGGTGTT |

The sequence of the restriction enzyme is underlined.
