# Supplementary material for: Comparative Transcriptome Analysis of Two Peach Rootstocks Uncovers the Effect of Gene Differential Expression on Nitrogen Use Efficiency
Source: Int J Mol Sci. 2022 Sep 22;23(19):11144. doi: 10.3390/ijms231911144 (PMC9570093; doi:10.3390/ijms231911144)
Supplement: Supplementary file 1 [file ijms-23-11144-s001.zip › ijms-1897150-Table S1.xlsx]

## Sheet: KCL_S-vs-KCL_M-diff-q-val-0.05
Table S1. List of DEGs obtained by comparative analysis from the four cDNA libraries.
gene_id	BaseMean	BaseMean_control_KCL_M	BaseMean_case_KCL_S	FoldChange	log2FoldChange	p-value	q-value	Regulation	Expression_KCL_M1	Expression_KCL_M2	Expression_KCL_M3	Expression_KCL_S1	Expression_KCL_S2	Expression_KCL_S3	gene_Dbxref	description	GO_id	GO_term	pathway	pathway_description
LOC109946246	12.5135	25.027	0	0	#NAME?	8.481e-08	2.08827e-06	Down	1.22619	1.63614	0.891504	0	0	0	GeneID:109946246	Ankyrin repeat-containing protein NPR4	GO:0005886,GO:0016020,GO:0016021	plasma membrane|membrane|integral component of membrane
LOC109946275	13.1704	1.62196	24.7188	15.24	3.92979	3.54554e-05	0.00045146	Up	0.0213647	0.0435997	0.0448737	0.581553	0.61352	0.441864	GeneID:109946275
LOC109946284	174.947	93.6876	256.206	2.73469	1.45138	6.44188e-08	1.62552e-06	Up	2.12101	2.22725	1.77331	5.82952	4.94975	5.60046	GeneID:109946284	Pentatricopeptide repeat-containing protein At3g62470, mitochondrial
LOC109946305	777.764	498.391	1057.14	2.1211	1.08481	2.64393e-07	5.71638e-06	Up	12.7466	13.8145	11.3947	25.4834	30.6373	22.4156	GeneID:109946305	UDP-glucose flavonoid 3-O-glucosyltransferase 7	GO:0047893,GO:0102360,GO:0102425	flavonol 3-O-glucosyltransferase activity|daphnetin 3-O-glucosyltransferase activity|myricetin 3-O-glucosyltransferase activity
LOC109946407	72.3604	26.7971	117.924	4.40062	2.13771	0.000408701	0.00366409	Up	0.725059	0.853647	0.790732	2.70236	4.89388	2.53773	GeneID:109946407	UDP-glycosyltransferase 74G1	GO:0035251	UDP-glucosyltransferase activity
LOC109946414	238.185	356.831	119.539	0.335003	-1.57776	1.59403e-10	6.39231e-09	Down	11.2699	13.2327	12.453	3.73461	4.79458	3.54694	GeneID:109946414	Anaphase-promoting complex subunit 2	GO:0005634,GO:0005680,GO:0005819,GO:0006511,GO:0007049,GO:0009561,GO:0016567,GO:0031625,GO:0051301	nucleus|anaphase-promoting complex|spindle|ubiquitin-dependent protein catabolic process|cell cycle|megagametogenesis|protein ubiquitination|ubiquitin protein ligase binding|cell division	ko04114,ko04110,ko04120,ko04111,ko04113	Oocyte meiosis|Cell cycle|Ubiquitin mediated proteolysis|Cell cycle - yeast|Meiosis - yeast
LOC109946448	14.4331	28.8661	0	0	#NAME?	7.88282e-09	2.39195e-07	Down	0.989237	0.504693	1.01002	0	0	0	GeneID:109946448	Retrovirus-related Pol polyprotein from transposon RE2	GO:0000943,GO:0003676,GO:0003964,GO:0004190,GO:0004519,GO:0006310,GO:0015074,GO:0046872	retrotransposon nucleocapsid|nucleic acid binding|RNA-directed DNA polymerase activity|aspartic-type endopeptidase activity|endonuclease activity|DNA recombination|DNA integration|metal ion binding
LOC109946489	1877.27	1231.84	2522.71	2.04791	1.03416	0.000778182	0.00637211	Up	33.7256	39.2537	22.7816	47.745	71.6874	71.0156	GeneID:109946489	Transcription factor TCP7	GO:0003700,GO:0005634,GO:0006355,GO:0042752,GO:0043565	DNA-binding transcription factor activity|nucleus|regulation of transcription, DNA-templated|regulation of circadian rhythm|sequence-specific DNA binding
LOC109946506	24.6304	38.6989	10.562	0.272927	-1.87341	0.00190665	0.0135094	Down	2.00345	2.66889	2.16243	0.363563	0.473516	0.978333	GeneID:109946506
LOC109946527	676.873	1039.04	314.709	0.302885	-1.72316	8.61238e-10	3.08847e-08	Down	31.6727	44.9214	44.84	11.9636	15.7255	8.1977	GeneID:109946527	Leucine-rich repeat extensin-like protein 6	GO:0005199,GO:0005576,GO:0005618,GO:0071555	structural constituent of cell wall|extracellular region|cell wall|cell wall organization	ko03010	Ribosome
LOC109946531	12.2596	23.8482	0.671067	0.0281391	-5.15128	0.000291931	0.00274319	Down	2.23246	2.71882	0.529401	0	0	0.148941	GeneID:109946531
LOC109946534	48.1139	69.4343	26.7936	0.385884	-1.37376	0.00157875	0.011559	Down	3.39201	4.44998	5.47057	1.25307	2.06152	1.6912	GeneID:109946534
LOC109946536	1292.44	1819.18	765.698	0.420902	-1.24844	4.41466e-07	9.09713e-06	Down	63.8346	45.8013	64.4951	24.1237	20.4741	27.3247	GeneID:109946536
LOC109946546	140.395	191.254	89.5356	0.468151	-1.09496	0.00423878	0.0256276	Down	18.4574	19.48	10.2326	10.0914	5.72917	6.30764	GeneID:109946546	40S ribosomal protein S28	GO:0000028,GO:0003735,GO:0006412,GO:0022627,GO:0030490	ribosomal small subunit assembly|structural constituent of ribosome|translation|cytosolic small ribosomal subunit|maturation of SSU-rRNA	ko03010	Ribosome
LOC109946570	120.633	194.115	47.15	0.242897	-2.04158	0.00737769	0.040136	Down	28.817	23.5232	8.00178	3.29717	6.4415	4.44469	GeneID:109946570
LOC109946574	598.707	146.86	1050.56	7.15346	2.83864	7.45262e-09	2.2757e-07	Up	7.96614	0.699796	3.54581	20.0183	31.2813	34.2058	GeneID:109946574	Protein NRT1/ PTR FAMILY 4.6	GO:0005886,GO:0009624,GO:0010119,GO:0015333,GO:0016021,GO:0035673,GO:0042128,GO:0080168,GO:0090440,GO:1904680	plasma membrane|response to nematode|regulation of stomatal movement|peptide:proton symporter activity|integral component of membrane|oligopeptide transmembrane transporter activity|nitrate assimilation|abscisic acid transport|abscisic acid transmembrane transporter activity|peptide transmembrane transporter activity
LOC109946611	7.80236	14.5981	1.0066	0.0689541	-3.85822	0.00229948	0.0157055	Down	0.415901	0.721434	0.786191	0	0	0.129025	GeneID:109946611	Monothiol glutaredoxin-S17	GO:0005634,GO:0005829,GO:0006879,GO:0006974,GO:0009055,GO:0009408,GO:0009926,GO:0015035,GO:0015038,GO:0042802,GO:0045454,GO:0046872,GO:0051537,GO:0051726,GO:0072593	nucleus|cytosol|cellular iron ion homeostasis|cellular response to DNA damage stimulus|electron transfer activity|response to heat|auxin polar transport|protein disulfide oxidoreductase activity|glutathione disulfide oxidoreductase activity|identical protein binding|cell redox homeostasis|metal ion binding|2 iron, 2 sulfur cluster binding|regulation of cell cycle|reactive oxygen species metabolic…
LOC109946633	17.6418	0	35.2835	Inf	Inf	7.65381e-11	3.26579e-09	Up	0	0	0	1.55374	1.43341	1.35269	GeneID:109946633
LOC109946640	104.232	52.5899	155.873	2.96394	1.56752	8.64965e-07	1.64394e-05	Up	1.98441	1.11039	2.21844	5.05312	5.24238	5.16328	GeneID:109946640	Deacetylvindoline O-acetyltransferase	GO:0005634,GO:0005737,GO:0009820,GO:0047162	nucleus|cytoplasm|alkaloid metabolic process|17-O-deacetylvindoline O-acetyltransferase activity	ko00940,ko00945,ko00941	Phenylpropanoid biosynthesis|Stilbenoid, diarylheptanoid and gingerol biosynthesis|Flavonoid biosynthesis
LOC109946653	39.9869	0.674084	79.2997	117.641	6.87824	1.84158e-18	2.01106e-16	Up	0	0	0.0734888	2.17147	2.67934	3.72671	GeneID:109946653	7-deoxyloganetin glucosyltransferase	GO:0035251,GO:1900994	UDP-glucosyltransferase activity|(-)-secologanin biosynthetic process
LOC109946663	821.45	1200.24	442.655	0.368804	-1.43907	2.91757e-05	0.0003795	Down	15.7614	20.7618	11.5641	5.22654	5.1992	6.85305	GeneID:109946663	Putative disease resistance protein RGA3	GO:0005524,GO:0006952,GO:0043531	ATP binding|defense response|ADP binding
LOC109946669	17.3527	0	34.7054	Inf	Inf	1.14641e-10	4.71466e-09	Up	0	0	0	1.07062	1.75695	1.38287	GeneID:109946669
LOC109946707	1411.44	2352.59	470.282	0.199899	-2.32265	1.41628e-06	2.57045e-05	Down	60.4823	50.4109	89.3604	17.8134	13.1866	8.47307	GeneID:109946707	(R)-mandelonitrile lyase 1	GO:0005773,GO:0016614,GO:0033095,GO:0046593,GO:0050660	vacuole|oxidoreductase activity, acting on CH-OH group of donors|aleurone grain|mandelonitrile lyase activity|flavin adenine dinucleotide binding	ko00460	Cyanoamino acid metabolism
LOC109946744	26.764	4.80395	48.724	10.1425	3.34234	1.58371e-07	3.67926e-06	Up	0.473185	0.344874	0.21297	2.57605	3.95425	3.63495	GeneID:109946744
LOC109946750	121.173	169.795	72.5513	0.427287	-1.22672	4.22557e-05	0.00052543	Down	2.50486	3.23745	3.24436	1.61821	1.45638	0.69074	GeneID:109946750	MDIS1-interacting receptor like kinase 2
LOC109946778	151.178	203.898	98.4578	0.482877	-1.05027	0.000133805	0.00141329	Down	20.345	19.5875	13.1814	7.86034	9.24869	7.88952	GeneID:109946778
LOC109946780	10.4437	0	20.8873	Inf	Inf	9.2438e-07	1.74315e-05	Up	0	0	0	0.904935	0.699802	0.644596	GeneID:109946780
LOC109946863	93.9255	42.0918	145.759	3.46289	1.79198	0.000863267	0.00694964	Up	1.75911	1.97903	2.27371	5.10757	9.59459	5.55056	GeneID:109946863
LOC109946869	398.396	602.141	194.651	0.323265	-1.62921	1.17402e-13	7.2733e-12	Down	23.8558	27.2736	21.1224	8.06816	6.95633	7.81911	GeneID:109946869	BAHD acyltransferase At5g47980	GO:0016747	transferase activity, transferring acyl groups other than amino-acyl groups
LOC109946881	7020.25	11295.5	2745	0.243018	-2.04087	5.56449e-14	3.59719e-12	Down	909.248	768.316	1083.11	192.194	205.083	259.578	GeneID:109946881
LOC109946882	27.4647	5.47673	49.4527	9.0296	3.17466	1.27332e-06	2.33732e-05	Up	0.109029	0.222499	0.143125	0.830983	1.73941	1.57845	GeneID:109946882
LOC109946887	16.6002	33.2005	0	0	#NAME?	4.80479e-10	1.78944e-08	Down	0.941672	1.2708	0.988928	0	0	0	GeneID:109946887
LOC109947000	223.162	445.279	1.04473	0.00234623	-8.73544	5.86287e-22	8.92311e-20	Down	8.55331	9.9624	4.65444	0.0178068	0.0347881	0	GeneID:109947000
LOC109947002	314.521	595.597	33.4454	0.0561544	-4.15446	8.74984e-14	5.56334e-12	Down	8.52544	9.83995	14.5307	0.570652	0.483102	0.758766	GeneID:109947002	G-type lectin S-receptor-like serine/threonine-protein kinase LECRK1	GO:0004674,GO:0005524,GO:0005886,GO:0006468,GO:0006952,GO:0016021,GO:0030246	protein serine/threonine kinase activity|ATP binding|plasma membrane|protein phosphorylation|defense response|integral component of membrane|carbohydrate binding
LOC109947016	70.4999	104.133	36.867	0.354038	-1.49802	5.94958e-05	0.000703791	Down	2.07461	2.49173	2.56454	1.20002	0.574612	0.715119	GeneID:109947016	Retrovirus-related Pol polyprotein from transposon RE1	GO:0000943,GO:0003676,GO:0003964,GO:0004190,GO:0004519,GO:0006310,GO:0015074,GO:0046872	retrotransposon nucleocapsid|nucleic acid binding|RNA-directed DNA polymerase activity|aspartic-type endopeptidase activity|endonuclease activity|DNA recombination|DNA integration|metal ion binding
LOC109947035	158.009	290.725	25.2925	0.0869982	-3.52287	1.79402e-29	4.12817e-27	Down	5.85348	6.94546	4.80565	0.456722	0.446136	0.591506	GeneID:109947035	Putative disease resistance protein At3g14460
LOC109947036	34.4519	66.517	2.38686	0.0358835	-4.80054	1.65451e-13	1.00251e-11	Down	5.3071	3.44024	4.39317	0.0679816	0.132812	0.258262	GeneID:109947036
LOC109947059	193.336	350.826	35.8466	0.102178	-3.29085	4.82188e-26	9.41435e-24	Down	20.3017	24.9834	16.8689	1.57891	1.77959	2.82611	GeneID:109947059
LOC109947065	138.446	71.4912	205.401	2.87309	1.52261	0.000276312	0.00261721	Up	3.11494	1.46133	3.49687	6.35436	9.90086	6.44232	GeneID:109947065
LOC109947070	13.1285	0	26.257	Inf	Inf	2.57189e-08	7.12206e-07	Up	0	0	0	0.725852	0.709029	1.27535	GeneID:109947070
LOC109947120	296.819	593.637	0	0	#NAME?	3.07209e-12	1.57927e-10	Down	21.7518	32.8484	8.78591	0	0	0	GeneID:109947120
LOC109947165	3.61385	0	7.2277	Inf	Inf	0.00968567	0.0494597	Up	0	0	0	0.641872	0.806137	0.435441	GeneID:109947165	Protein DETOXIFICATION 35	GO:0005773,GO:0005774,GO:0006855,GO:0009813,GO:0015238,GO:0015297,GO:0016021	vacuole|vacuolar membrane|drug transmembrane transport|flavonoid biosynthetic process|drug transmembrane transporter activity|antiporter activity|integral component of membrane
LOC109947182	5861.66	9265.02	2458.3	0.265331	-1.91413	5.8525e-20	7.39365e-18	Down	538.733	473.947	611.621	114.866	155.165	150.864	GeneID:109947182	Abrin-b	GO:0006952,GO:0017148,GO:0030246,GO:0030598,GO:0090729	defense response|negative regulation of translation|carbohydrate binding|rRNA N-glycosylase activity|toxin activity
LOC109947197	35.1348	12.5568	57.7127	4.59613	2.20042	2.22012e-05	0.00029967	Up	0.353053	0.312211	0.271898	1.61451	1.60213	0.997917	GeneID:109947197	Rust resistance kinase Lr10	GO:0004674,GO:0005524,GO:0005886,GO:0016021	protein serine/threonine kinase activity|ATP binding|plasma membrane|integral component of membrane
LOC109947209	85.7806	141.983	29.5786	0.208325	-2.26309	2.53898e-10	9.85462e-09	Down	7.32636	6.0659	5.45176	1.50424	0.667898	1.68841	GeneID:109947209
LOC109947231	109.657	0	219.314	Inf	Inf	8.73377e-53	5.11561e-50	Up	0	0	0	2.43455	2.70659	3.24476	GeneID:109947231	Putative ribonuclease H protein At1g65750	GO:0003676,GO:0004523,GO:0046872	nucleic acid binding|RNA-DNA hybrid ribonuclease activity|metal ion binding
LOC109947299	18.8469	0	37.6938	Inf	Inf	1.64545e-11	7.66383e-10	Up	0	0	0	3.20936	4.07547	4.16572	GeneID:109947299	Protein CHROMOSOME TRANSMISSION FIDELITY 7	GO:0000070,GO:0000724,GO:0005634,GO:0005737,GO:0006275,GO:0007062,GO:0009553,GO:0009793,GO:0016407,GO:0034089,GO:0034421,GO:0045132,GO:0046872,GO:0048364,GO:0048609,GO:0048653,GO:0051301,GO:0060772,GO:0080186	mitotic sister chromatid segregation|double-strand break repair via homologous recombination|nucleus|cytoplasm|regulation of DNA replication|sister chromatid cohesion|embryo sac development|embryo development ending in seed dormancy|acetyltransferase activity|establishment of meiotic sister chromatid cohesion|post-translational protein acetylation|meiotic chromosome segregation|metal ion binding|…
LOC109947364	66.8703	125.133	8.60796	0.0687907	-3.86164	3.30364e-18	3.41476e-16	Down	3.62388	4.94246	5.65208	0.312532	0.419772	0.222621	GeneID:109947364
LOC109947381	3.59479	0	7.18957	Inf	Inf	0.00981834	0.0498761	Up	0	0	0	0.435798	0.496647	0.551865	GeneID:109947381	TMV resistance protein N	GO:0005524,GO:0005737,GO:0007165,GO:0009626,GO:0043531	ATP binding|cytoplasm|signal transduction|plant-type hypersensitive response|ADP binding
LOC109947411	170.088	240.952	99.2245	0.411801	-1.27998	1.97506e-06	3.47053e-05	Down	4.28485	4.07482	4.71588	2.3327	1.8776	1.08115	GeneID:109947411	Receptor-like protein 6	GO:0005886,GO:0016020,GO:0016021	plasma membrane|membrane|integral component of membrane
LOC109947437	41.2162	13.5632	68.8692	5.07766	2.34416	1.35613e-06	2.47289e-05	Up	0.110574	0.67696	0.406432	1.62533	2.08748	2.17255	GeneID:109947437	NAC domain-containing protein 14	GO:0003677,GO:0003700,GO:0005634,GO:0016021	DNA binding|DNA-binding transcription factor activity|nucleus|integral component of membrane
LOC109947472	43.1022	68.3162	17.8882	0.261844	-1.93322	8.22142e-05	0.000930942	Down	1.14045	1.74553	0.871045	0.225771	0.422698	0.30377	GeneID:109947472	Transport protein particle subunit bet5	GO:0005634,GO:0005783,GO:0005801,GO:0005829,GO:0006886,GO:0006888,GO:0017112,GO:0030008	nucleus|endoplasmic reticulum|cis-Golgi network|cytosol|intracellular protein transport|ER to Golgi vesicle-mediated transport|Rab guanyl-nucleotide exchange factor activity|TRAPP complex
LOC109947473	38.7929	74.4687	3.1171	0.0418579	-4.57836	3.12805e-06	5.25757e-05	Down	2.24232	1.02309	1.03384	0.059548	0.0969465	0.0188519	GeneID:109947473	AP-4 complex subunit epsilon	GO:0005794,GO:0005829,GO:0005905,GO:0006886,GO:0009506,GO:0016192,GO:0030124	Golgi apparatus|cytosol|clathrin-coated pit|intracellular protein transport|plasmodesma|vesicle-mediated transport|AP-4 adaptor complex	ko04142	Lysosome
LOC109947476	262.664	171.412	353.916	2.06471	1.04594	0.000144369	0.00150757	Up	12.1916	9.85677	14.0628	21.2535	21.3277	30.4505	GeneID:109947476	Calcium-binding protein KIC	GO:0005509,GO:0010091	calcium ion binding|trichome branching
LOC109947481	72.3221	96.5043	48.1399	0.498837	-1.00336	0.00529665	0.0306432	Down	1.76078	2.39553	2.04044	0.969599	1.24848	0.795302	GeneID:109947481
LOC109947500	448.011	658.85	237.172	0.35998	-1.47401	9.70537e-06	0.000144861	Down	48.0366	51.4784	30.0993	18.8047	11.0608	15.8754	GeneID:109947500	Heavy metal-associated isoprenylated plant protein 39	GO:0030001,GO:0046872	metal ion transport|metal ion binding
LOC109947511	716.327	1086.95	345.702	0.318047	-1.65269	1.22052e-16	1.07724e-14	Down	19.5622	19.0928	18.7925	5.77432	5.76465	6.3292	GeneID:109947511
LOC109947519	29.2588	10.0515	48.4662	4.82178	2.26957	0.000246119	0.00236443	Up	0.443426	0.120655	0.372543	2.22092	1.00612	1.25336	GeneID:109947519	Probable polygalacturonase	GO:0004650,GO:0005975,GO:0016021	polygalacturonase activity|carbohydrate metabolic process|integral component of membrane
LOC109947521	83.6417	139.664	27.619	0.197753	-2.33823	0.00454589	0.0271531	Down	9.67789	2.75698	9.18332	1.33723	1.04499	1.82885	GeneID:109947521
LOC109947525	43.7557	12.5347	74.9768	5.98153	2.58051	8.43695e-08	2.08007e-06	Up	0.387466	0.486594	0.313008	1.97958	2.9481	1.97257	GeneID:109947525
LOC109947573	48.7296	73.2679	24.1914	0.330177	-1.59869	0.000239703	0.00231314	Down	3.14649	4.47672	2.69936	1.15806	0.754149	1.42067	GeneID:109947573
LOC109947607	7.67317	1.57908	13.7673	8.71853	3.12408	0.00874651	0.0456922	Up	0	0.317758	0	0.949403	1.12613	0.579661	GeneID:109947607	B3 domain-containing protein REM8	GO:0003677,GO:0005634	DNA binding|nucleus
LOC109947609	17.8942	34.3779	1.41045	0.0410277	-4.60726	1.33003e-07	3.14476e-06	Down	1.16258	2.11463	2.2295	0	0.215041	0	GeneID:109947609	Disease resistance-like protein DSC1	GO:0005524,GO:0007165,GO:0009626,GO:0042742,GO:0043531	ATP binding|signal transduction|plant-type hypersensitive response|defense response to bacterium|ADP binding
LOC109947615	6.1502	0	12.3004	Inf	Inf	0.000295312	0.00277091	Up	0	0	0	0.760468	0.39327	0.424855	GeneID:109947615	Probable isoaspartyl peptidase/L-asparaginase 2	GO:0004067,GO:0005737,GO:0008798,GO:0016787,GO:0033345,GO:0051604	asparaginase activity|cytoplasm|beta-aspartyl-peptidase activity|hydrolase activity|asparagine catabolic process via L-aspartate|protein maturation
LOC109947619	31.5882	52.7529	10.4235	0.19759	-2.33942	1.72375e-05	0.00024141	Down	1.21659	1.32699	0.969249	0.0913546	0.446186	0.130146	GeneID:109947619
LOC109947625	50.9455	16.5151	85.3759	5.16957	2.37005	5.81232e-05	0.000690937	Up	0.0853508	0.145149	0.507926	1.37848	1.60373	0.77964	GeneID:109947625	Receptor-like protein 6	GO:0005886,GO:0016020,GO:0016021	plasma membrane|membrane|integral component of membrane
LOC109947627	248.252	387.901	108.604	0.279979	-1.83661	1.08941e-13	6.8146e-12	Down	15.9939	19.5836	18.3151	4.34165	5.12652	5.25631	GeneID:109947627
LOC109947678	1431.74	1941.83	921.647	0.474628	-1.07513	3.61676e-09	1.16904e-07	Down	34.7253	31.5296	25.7818	14.691	12.8408	15.2043	GeneID:109947678	Cellulose synthase A catalytic subunit 3 [UDP-forming]	GO:0005768,GO:0005794,GO:0005802,GO:0005886,GO:0006952,GO:0009506,GO:0009833,GO:0009834,GO:0016021,GO:0016759,GO:0016760,GO:0030244,GO:0046872,GO:0071555	endosome|Golgi apparatus|trans-Golgi network|plasma membrane|defense response|plasmodesma|plant-type primary cell wall biogenesis|plant-type secondary cell wall biogenesis|integral component of membrane|cellulose synthase activity|cellulose synthase (UDP-forming) activity|cellulose biosynthetic process|metal ion binding|cell wall organization
LOC109947681	6.31856	0	12.6371	Inf	Inf	0.000234478	0.00226838	Up	0	0	0	0.216998	0.163053	0.221947	GeneID:109947681	Putative disease resistance protein RGA3	GO:0005524,GO:0006952,GO:0043531	ATP binding|defense response|ADP binding
LOC109947682	52.9278	100.717	5.13824	0.0510165	-4.29289	3.74984e-17	3.48465e-15	Down	5.32422	7.30392	6.2748	0.32206	0.314595	0.305876	GeneID:109947682	Pentatricopeptide repeat-containing protein At1g76280
LOC109947691	58.0203	31.4304	84.6103	2.69199	1.42868	0.000761834	0.0062709	Up	0.674818	0.999526	0.502936	2.15685	2.31523	1.23808	GeneID:109947691	Rust resistance kinase Lr10	GO:0004674,GO:0005524,GO:0005886,GO:0016021	protein serine/threonine kinase activity|ATP binding|plasma membrane|integral component of membrane
LOC109947694	82.5389	123.902	41.1755	0.332322	-1.58935	5.20173e-06	8.39267e-05	Down	1.63291	1.51781	1.24503	0.438393	0.535291	0.451061	GeneID:109947694	Putative disease resistance protein RGA1	GO:0005524,GO:0006952,GO:0043531	ATP binding|defense response|ADP binding
LOC109947713	29.0911	0	58.1822	Inf	Inf	0.000612733	0.00519909	Up	0	0	0	3.88833	0.649267	1.07316	GeneID:109947713
LOC109947786	3.97196	7.94391	0	0	#NAME?	0.00639736	0.0356867	Down	0.841966	0.552289	0.126317	0	0	0	GeneID:109947786
LOC109947792	122.607	77.5524	167.661	2.16191	1.11231	0.000185851	0.00186711	Up	2.04125	1.87907	1.53786	4.95239	2.90256	3.73988	GeneID:109947792	7-deoxyloganetin glucosyltransferase	GO:0035251	UDP-glucosyltransferase activity
LOC109947794	34.5427	19.5303	49.555	2.53734	1.34332	0.00770917	0.0414494	Up	0.749976	0.734642	0.378054	1.66583	1.30816	1.64416	GeneID:109947794	7-deoxyloganetin glucosyltransferase	GO:0035251	UDP-glucosyltransferase activity
LOC109947798	139.901	216.468	63.3333	0.292576	-1.77312	1.67532e-09	5.6911e-08	Down	3.50574	3.52555	4.51359	1.19284	0.699117	1.4292	GeneID:109947798
LOC109947814	474.195	704.658	243.731	0.345886	-1.53163	6.5005e-06	0.000101987	Down	26.8106	20.1401	33.3856	9.39007	9.47946	8.39581	GeneID:109947814	Trans-resveratrol di-O-methyltransferase	GO:0008171,GO:0008757,GO:0019438,GO:0046983,GO:0102303	O-methyltransferase activity|S-adenosylmethionine-dependent methyltransferase activity|aromatic compound biosynthetic process|protein dimerization activity|resveratrol 3,5-O-dimethyltransferase activity
LOC109947818	115.333	74.2066	156.459	2.10843	1.07617	0.000482511	0.00421439	Up	3.05099	2.11958	2.45421	5.01828	6.52445	4.16195	GeneID:109947818
LOC109947820	76.6814	30.1628	123.2	4.08451	2.03016	3.66231e-05	0.000463884	Up	1.13383	2.80967	1.24743	7.40717	8.6711	4.52247	GeneID:109947820	LRR receptor-like serine/threonine-protein kinase IOS1	GO:0002229,GO:0002237,GO:0002238,GO:0002239,GO:0004674,GO:0005524,GO:0005886,GO:0009620,GO:0009738,GO:0009788,GO:0010200,GO:0016021,GO:0042802,GO:0042803,GO:0090406,GO:1900150,GO:1900426,GO:1902289,GO:2000071	defense response to oomycetes|response to molecule of bacterial origin|response to molecule of fungal origin|response to oomycetes|protein serine/threonine kinase activity|ATP binding|plasma membrane|response to fungus|abscisic acid-activated signaling pathway|negative regulation of abscisic acid-activated signaling pathway|response to chitin|integral component of membrane|identical protein bindi…
LOC109947831	26.7171	0	53.4341	Inf	Inf	8.71995e-16	7.05221e-14	Up	0	0	0	2.12567	1.58975	1.35642	GeneID:109947831	7-deoxyloganetin glucosyltransferase	GO:0035251,GO:1900994	UDP-glucosyltransferase activity|(-)-secologanin biosynthetic process
LOC109947848	19.6118	0.337042	38.8866	115.376	6.8502	7.70488e-11	3.27314e-09	Up	0	0	0.0386938	1.76515	1.05806	1.63835	GeneID:109947848	Probable O-methyltransferase 3	GO:0008171,GO:0046983	O-methyltransferase activity|protein dimerization activity
LOC109947859	96.5227	23.2135	169.832	7.31608	2.87107	9.7372e-08	2.35853e-06	Up	0.672492	1.21989	0.863182	4.51534	8.46375	6.56788	GeneID:109947859	Probable O-methyltransferase 3	GO:0008171,GO:0046983	O-methyltransferase activity|protein dimerization activity
LOC109947888	260.306	398.222	122.389	0.307338	-1.7021	2.2828e-12	1.18933e-10	Down	18.8163	19.1996	15.4088	5.11035	4.81202	6.1216	GeneID:109947888
LOC109947902	62.5992	96.406	28.7924	0.298658	-1.74343	9.305e-06	0.000139579	Down	5.23435	5.23923	4.76409	1.30268	1.59061	1.54652	GeneID:109947902	Probable acyl-activating enzyme 16, chloroplastic	GO:0006631,GO:0009941,GO:0016874	fatty acid metabolic process|chloroplast envelope|ligase activity	ko00071,ko00061,ko04146,ko02024,ko01212	Fatty acid degradation|Fatty acid biosynthesis|Peroxisome|Quorum sensing|Fatty acid metabolism
LOC109947911	65.162	6.48959	123.834	19.082	4.25414	2.75808e-20	3.67661e-18	Up	0.259327	0.132304	0.272341	3.31771	4.03378	5.0617	GeneID:109947911	Protein DJ-1 homolog D	GO:0004462,GO:0019172	lactoylglutathione lyase activity|glyoxalase III activity	ko00620	Pyruvate metabolism
LOC109947915	339.236	492.391	186.08	0.37791	-1.40389	2.81265e-05	0.000368331	Down	16.7373	12.7424	20.9837	5.79205	7.21025	5.66871	GeneID:109947915	tRNAse Z TRZ4, mitochondrial	GO:0005739,GO:0042780,GO:0042781,GO:0046872,GO:0072684	mitochondrion|tRNA 3'-end processing|3'-tRNA processing endoribonuclease activity|metal ion binding|mitochondrial tRNA 3'-trailer cleavage, endonucleolytic
LOC109947922	433.645	276.735	590.555	2.13401	1.09357	8.57994e-07	1.63552e-05	Up	3.45364	4.10086	3.23973	6.1156	7.86929	8.45189	GeneID:109947922	Receptor-like protein 6	GO:0005886,GO:0016020,GO:0016021	plasma membrane|membrane|integral component of membrane
LOC109947933	79.2006	150.614	7.78715	0.0517027	-4.27362	3.13473e-23	5.36206e-21	Down	14.3733	14.0438	13.1734	0.853624	0.185298	1.08097	GeneID:109947933
LOC109947955	17.089	0	34.1781	Inf	Inf	1.51971e-10	6.10697e-09	Up	0	0	0	1.6039	2.02369	2.8562	GeneID:109947955	Auxin response factor 6	GO:0003677,GO:0003700,GO:0005634,GO:0009733,GO:0009734,GO:0009908	DNA binding|DNA-binding transcription factor activity|nucleus|response to auxin|auxin-activated signaling pathway|flower development
LOC109947957	4.11198	0	8.22396	Inf	Inf	0.00483496	0.0284924	Up	0	0	0	0.857364	0.450957	0.250548	GeneID:109947957
LOC109948002	16.6532	31.6036	1.70269	0.0538763	-4.21421	1.41989e-06	2.57217e-05	Down	2.58462	1.96105	2.08795	0.144316	0.0704858	0.137064	GeneID:109948002
LOC109948031	12.1514	22.9397	1.36318	0.0594245	-4.0728	5.8851e-05	0.000697872	Down	0.54002	0.972388	0.800641	0.0345871	0.0337855	0.0656982	GeneID:109948031	Protein FAR1-RELATED SEQUENCE 5	GO:0005634,GO:0006355,GO:0008270	nucleus|regulation of transcription, DNA-templated|zinc ion binding
LOC109948046	8.59148	0	17.183	Inf	Inf	1.12155e-05	0.000164355	Up	0	0	0	0.348088	0.595036	0.468345	GeneID:109948046	TMV resistance protein N	GO:0005524,GO:0005737,GO:0007165,GO:0009626,GO:0043531	ATP binding|cytoplasm|signal transduction|plant-type hypersensitive response|ADP binding
LOC109948066	15.4117	27.0302	3.79334	0.140337	-2.83303	0.000406232	0.00364703	Down	1.58273	1.56287	1.23321	0	0.32581	0.263984	GeneID:109948066	Protein FAR-RED IMPAIRED RESPONSE 1	GO:0003700,GO:0005634,GO:0008270,GO:0009639,GO:0010017,GO:0010018,GO:0010218,GO:0042753,GO:0045893	DNA-binding transcription factor activity|nucleus|zinc ion binding|response to red or far red light|red or far-red light signaling pathway|far-red light signaling pathway|response to far red light|positive regulation of circadian rhythm|positive regulation of transcription, DNA-templated
LOC109948086	21.8086	1.2637	42.3535	33.5156	5.06676	9.03514e-10	3.2281e-08	Up	0.0578749	0.177161	0	2.64662	2.09285	2.87272	GeneID:109948086	PR5-like receptor kinase	GO:0004672,GO:0004675,GO:0005524,GO:0009506,GO:0009620,GO:0016021	protein kinase activity|transmembrane receptor protein serine/threonine kinase activity|ATP binding|plasmodesma|response to fungus|integral component of membrane
LOC109948113	42.4489	70.6421	14.2556	0.2018	-2.309	1.53336e-06	2.75706e-05	Down	6.3101	5.92058	4.03699	0.868686	0.539988	1.80007	GeneID:109948113
LOC109948124	46.4923	26.3158	66.6688	2.53342	1.34108	0.00233256	0.0158865	Up	0.571249	0.437164	0.316623	1.38219	0.911351	1.00096	GeneID:109948124	Receptor-like protein 6	GO:0005886,GO:0016020,GO:0016021	plasma membrane|membrane|integral component of membrane
LOC109948125	443.552	66.0028	821.101	12.4404	3.63696	3.98892e-17	3.68908e-15	Up	3.75544	4.60867	2.29172	33.3195	51.9785	43.2957	GeneID:109948125	Probable calcium-binding protein CML27	GO:0005509,GO:0005773,GO:0005886	calcium ion binding|vacuole|plasma membrane
LOC109948155	97.4168	17.6805	177.153	10.0197	3.32477	7.22556e-20	8.89573e-18	Up	0.505516	0.166391	0.239754	2.41471	3.19124	3.32202	GeneID:109948155	Receptor-like protein EIX1	GO:0005886,GO:0016021,GO:0050832	plasma membrane|integral component of membrane|defense response to fungus
LOC109948160	70.154	2.25403	138.054	61.2476	5.93658	2.70154e-29	6.07186e-27	Up	0.0633334	0.0969351	0.0665117	5.03395	4.44576	4.09331	GeneID:109948160	Protein DJ-1 homolog D	GO:0004462,GO:0019172	lactoylglutathione lyase activity|glyoxalase III activity	ko00620	Pyruvate metabolism
LOC109948164	2440.55	3403.95	1477.16	0.433955	-1.20438	7.8544e-12	3.83378e-10	Down	107.693	115.087	100.881	48.9007	56.8234	31.4377	GeneID:109948164	7-deoxyloganetin glucosyltransferase	GO:0035251,GO:1900994	UDP-glucosyltransferase activity|(-)-secologanin biosynthetic process
LOC109948168	29.3669	58.7338	0	0	#NAME?	4.329e-05	0.000536723	Down	8.56509	0.882782	6.54176	0	0	0	GeneID:109948168	Casparian strip membrane protein 1	GO:0005886,GO:0016021,GO:0071555	plasma membrane|integral component of membrane|cell wall organization
LOC109948172	52.947	34.1488	71.7451	2.10096	1.07105	0.00843	0.0444936	Up	2.17624	2.63179	3.89374	6.84528	4.88638	6.25125	GeneID:109948172
LOC109948174	212.804	303.625	121.983	0.401756	-1.31561	2.02397e-07	4.53318e-06	Down	16.855	23.2484	23.9977	7.90659	8.71532	8.54266	GeneID:109948174
LOC109948179	36.284	70.539	2.02908	0.0287654	-5.11952	2.14227e-11	9.74303e-10	Down	1.78631	1.15118	2.29558	0.102366	0	0.0486112	GeneID:109948179
LOC109948204	5.57219	0.632065	10.5123	16.6317	4.05586	0.00830848	0.0439865	Up	0.0544558	0.055565	0	0.889383	0.173754	0.732065	GeneID:109948204
LOC109948226	327.36	168.461	486.259	2.88647	1.52931	5.19604e-10	1.92403e-08	Up	18.2021	15.4249	21.1675	46.4674	60.8122	47.3227	GeneID:109948226
LOC109948232	16.9753	0	33.9505	Inf	Inf	1.82277e-10	7.24943e-09	Up	0	0	0	1.28638	1.29353	1.07801	GeneID:109948232	7-deoxyloganetin glucosyltransferase	GO:0035251,GO:1900994	UDP-glucosyltransferase activity|(-)-secologanin biosynthetic process
LOC109948235	110.368	0	220.735	Inf	Inf	7.46392e-41	3.00563e-38	Up	0	0	0	9.55233	7.00895	11.1627	GeneID:109948235	Probable O-methyltransferase 3	GO:0008171,GO:0046983	O-methyltransferase activity|protein dimerization activity
LOC109948239	594.027	894.075	293.978	0.328807	-1.60469	1.18143e-13	7.29579e-12	Down	63.2729	83.7667	79.9901	33.1381	19.5072	20.7886	GeneID:109948239
LOC109948245	110.614	60.1994	161.029	2.67493	1.4195	5.27688e-06	8.49265e-05	Up	6.01275	3.27676	3.73129	10.6385	10.3192	13.1421	GeneID:109948245
LOC109948261	10.4649	19.889	1.04076	0.0523283	-4.25626	0.000138508	0.00145659	Down	0.649147	0.397422	0.988499	0	0.0690418	0.0335641	GeneID:109948261	Protein ACCELERATED CELL DEATH 6	GO:0005887,GO:0008219,GO:0009416,GO:0009615,GO:0009617,GO:0009751,GO:0009816,GO:0016020,GO:0016567,GO:0030176,GO:0050826,GO:0071446,GO:1900150,GO:1900426,GO:1902290,GO:2000031	integral component of plasma membrane|cell death|response to light stimulus|response to virus|response to bacterium|response to salicylic acid|defense response to bacterium, incompatible interaction|membrane|protein ubiquitination|integral component of endoplasmic reticulum membrane|response to freezing|cellular response to salicylic acid stimulus|regulation of defense response to fungus|positive…
LOC109948265	11.2532	1.01113	21.4952	21.2587	4.40998	3.86647e-05	0.000484663	Up	0	0	0.186598	1.35423	1.00788	1.59241	GeneID:109948265
LOC109948297	12391.7	21985.7	2797.63	0.127248	-2.97429	1.50687e-06	2.717e-05	Down	900.279	1430.5	646.951	101.279	119.062	147.737	GeneID:109948297	Major pollen allergen Lig v 1	GO:0005615	extracellular space
LOC109948334	1067.2	1922.52	211.872	0.110205	-3.18173	7.51344e-55	5.00784e-52	Down	63.0825	61.7465	61.4634	8.39002	6.04911	5.72335	GeneID:109948334	7-deoxyloganetin glucosyltransferase	GO:0035251	UDP-glucosyltransferase activity
LOC109948335	147.984	229.942	66.0257	0.287141	-1.80017	3.24322e-10	1.23402e-08	Down	5.81117	7.28723	6.70167	1.89227	2.28163	1.37597	GeneID:109948335	7-deoxyloganetin glucosyltransferase	GO:0035251	UDP-glucosyltransferase activity
LOC109948397	18.699	0	37.398	Inf	Inf	2.01574e-11	9.27674e-10	Up	0	0	0	1.10237	1.0499	0.785229	GeneID:109948397
LOC109948408	2339.33	3384.07	1294.59	0.382555	-1.38626	0.000778341	0.00637211	Down	165.546	263.767	156.697	110.283	70.8916	38.8558	GeneID:109948408
LOC109948409	38.3332	74.6294	2.03702	0.0272951	-5.19521	0.00718379	0.039258	Down	2.77335	0	1.90676	0.130345	0	0	GeneID:109948409
LOC109948413	134.996	49.781	220.211	4.4236	2.14522	1.16992e-12	6.36998e-11	Up	2.68701	3.31079	2.02322	10.5986	13.8039	10.1184	GeneID:109948413	Wall-associated receptor kinase 2
LOC109948416	623.802	260.385	987.22	3.79139	1.92273	0.00044109	0.00389841	Up	3.95645	4.9675	3.24368	11.4021	21.1494	12.1828	GeneID:109948416	BAHD acyltransferase At5g47980	GO:0016747	transferase activity, transferring acyl groups other than amino-acyl groups	ko00940,ko00945,ko00941	Phenylpropanoid biosynthesis|Stilbenoid, diarylheptanoid and gingerol biosynthesis|Flavonoid biosynthesis
LOC109948421	3.99275	7.9855	0	0	#NAME?	0.00629783	0.0352128	Down	0.649979	0.497414	0.227533	0	0	0	GeneID:109948421
LOC109948427	104.528	206.703	2.3527	0.0113821	-6.45709	1.34773e-13	8.29625e-12	Down	2.83987	6.02881	3.66293	0.0207523	0	0.118257	GeneID:109948427
LOC109948428	1772.14	2933.92	610.364	0.208037	-2.26509	6.2603e-30	1.53171e-27	Down	74.2811	59.2338	71.539	12.5981	16.5569	12.5131	GeneID:109948428	(-)-alpha-pinene synthase	GO:0000287,GO:0005829,GO:0010333,GO:0016114	magnesium ion binding|cytosol|terpene synthase activity|terpenoid biosynthetic process
LOC109948429	41.1281	82.2562	0	0	#NAME?	0.000204526	0.00202317	Down	6.79123	0.0481219	5.34903	0	0	0	GeneID:109948429				ko04068,ko04140,ko04139	FoxO signaling pathway|Regulation of autophagy|Regulation of mitophagy - yeast
LOC109948430	313.668	140.297	487.039	3.47149	1.79555	1.22966e-14	8.58051e-13	Up	5.51958	4.27615	5.33142	18.5487	18.9523	13.9524	GeneID:109948430	BAHD acyltransferase At5g47980	GO:0016747	transferase activity, transferring acyl groups other than amino-acyl groups	ko00940,ko00945,ko00941	Phenylpropanoid biosynthesis|Stilbenoid, diarylheptanoid and gingerol biosynthesis|Flavonoid biosynthesis
LOC109948432	21.7936	9.45886	34.1284	3.60809	1.85123	0.00326163	0.0208066	Up	0.234095	0.272987	0.491686	1.20161	0.924777	1.41788	GeneID:109948432	BAHD acyltransferase At5g47980	GO:0016747	transferase activity, transferring acyl groups other than amino-acyl groups
LOC109948452	1992.26	3254.31	730.21	0.224382	-2.15597	2.42573e-31	6.42287e-29	Down	174.772	184.392	197.434	42.8557	34.5696	45.0014	GeneID:109948452
LOC109948513	42.9848	3.28552	82.6842	25.1663	4.65342	0.000289355	0.00272163	Up	0	0.10552	0.162905	3.91277	0.962395	1.84471	GeneID:109948513	(-)-alpha-pinene synthase	GO:0000287,GO:0005829,GO:0010333,GO:0016114	magnesium ion binding|cytosol|terpene synthase activity|terpenoid biosynthetic process
LOC109948528	4.15588	0	8.31175	Inf	Inf	0.0046862	0.0278022	Up	0	0	0	0.139186	0.380687	0.132191	GeneID:109948528	Receptor-like protein EIX2	GO:0005886,GO:0016021,GO:0050832	plasma membrane|integral component of membrane|defense response to fungus
LOC109948532	55.6152	29.7607	81.4696	2.73749	1.45285	0.00117306	0.00896919	Up	0.159471	0.637316	0.460552	1.41801	0.734974	1.22307	GeneID:109948532	Cyclic nucleotide-gated ion channel 1	GO:0005216,GO:0005516,GO:0005886,GO:0016021,GO:0030552,GO:0030553	ion channel activity|calmodulin binding|plasma membrane|integral component of membrane|cAMP binding|cGMP binding
LOC109948547	20.7697	4.29794	37.2415	8.66497	3.11519	8.24416e-06	0.000125375	Up	0.126115	0.0428947	0.397333	1.60202	1.38605	1.86929	GeneID:109948547
LOC109948592	172.929	62.0059	283.852	4.57781	2.19466	1.31269e-09	4.5717e-08	Up	1.94444	1.31297	2.34232	6.35139	8.69802	10.0241	GeneID:109948592	BAHD acyltransferase At5g47980	GO:0016747	transferase activity, transferring acyl groups other than amino-acyl groups
LOC109948596	38.3303	5.54258	71.1179	12.8312	3.68158	0.00344315	0.0217138	Up	1.16103	0	1.08382	14.7484	1.92087	12.1396	GeneID:109948596
LOC109948626	944.038	1352.68	535.392	0.3958	-1.33716	0.000317344	0.00295185	Down	35.9202	28.6368	49.2159	13.5683	12.8574	17.7602	GeneID:109948626	(-)-alpha-pinene synthase	GO:0000287,GO:0005829,GO:0010333,GO:0016114	magnesium ion binding|cytosol|terpene synthase activity|terpenoid biosynthetic process
LOC109948638	135.259	1.30615	269.211	206.111	7.68728	2.59413e-56	2.00568e-53	Up	0.101194	0.103256	0.212545	30.1898	23.4629	30.9749	GeneID:109948638	Fructose-bisphosphate aldolase 6, cytosolic	GO:0004332,GO:0005507,GO:0005634,GO:0005739,GO:0005829,GO:0005886,GO:0006094,GO:0006096,GO:0009506,GO:0009651,GO:0009735,GO:0016020,GO:0031930,GO:0046686	fructose-bisphosphate aldolase activity|copper ion binding|nucleus|mitochondrion|cytosol|plasma membrane|gluconeogenesis|glycolytic process|plasmodesma|response to salt stress|response to cytokinin|membrane|mitochondria-nucleus signaling pathway|response to cadmium ion	ko00710,ko00680,ko01200,ko01230,ko00030,ko00051,ko00010	Carbon fixation in photosynthetic organisms|Methane metabolism|Carbon metabolism|Biosynthesis of amino acids|Pentose phosphate pathway|Fructose and mannose metabolism|Glycolysis / Gluconeogenesis
LOC109948819	7.03647	13.0624	1.01057	0.0773649	-3.69218	0.00478448	0.0282638	Down	0.758579	0.77403	0.221291	0.0458861	0	0.0871607	GeneID:109948819
LOC109948827	83.5598	129.277	37.8424	0.292723	-1.77239	4.09051e-07	8.50451e-06	Down	9.17456	7.65935	7.57034	2.14058	2.97804	1.8482	GeneID:109948827
LOC109948840	107.738	3.2227	212.253	65.8618	6.04137	2.74468e-41	1.1533e-38	Up	0.044747	0.114146	0.0704889	5.01828	5.21131	4.48847	GeneID:109948840	Cytochrome P450 71D11 (Fragment)	GO:0004497,GO:0005506,GO:0016705,GO:0020037	monooxygenase activity|iron ion binding|oxidoreductase activity, acting on paired donors, with incorporation or reduction of molecular oxygen|heme binding
LOC109948856	6.00528	0	12.0106	Inf	Inf	0.000365848	0.00333403	Up	0	0	0	0.205974	0.4024	0.391247	GeneID:109948856	(-)-alpha-pinene synthase	GO:0000287,GO:0005829,GO:0010333,GO:0016114	magnesium ion binding|cytosol|terpene synthase activity|terpenoid biosynthetic process
LOC109948881	315.597	172.482	458.712	2.65948	1.41114	7.78918e-10	2.8089e-08	Up	5.41753	5.61038	3.73632	14.6146	10.2626	13.5736	GeneID:109948881	Vinorine synthase	GO:0009820,GO:0050636	alkaloid metabolic process|vinorine synthase activity
LOC109948882	305.752	175.803	435.701	2.47834	1.30937	1.24652e-08	3.64508e-07	Up	8.13793	9.59219	8.34986	20.7258	20.2455	22.1993	GeneID:109948882	TMV resistance protein N	GO:0005524,GO:0005737,GO:0007165,GO:0009626,GO:0043531	ATP binding|cytoplasm|signal transduction|plant-type hypersensitive response|ADP binding
LOC109948885	2027.97	1276.06	2779.89	2.1785	1.12334	0.000407905	0.00366035	Up	131.375	64.3264	159.08	235.492	215.499	308.91	GeneID:109948885
LOC109948926	46.1419	21.5729	70.7109	3.27776	1.71271	0.000112049	0.00121401	Up	0.730401	0.657598	1.53411	2.24547	3.7471	3.37666	GeneID:109948926
LOC109948937	19.5765	1.32737	37.8257	28.4966	4.83272	1.19801e-08	3.5192e-07	Up	0.118178	0	0.372326	5.91899	5.40473	2.56636	GeneID:109948937
LOC109948939	144.16	61.7919	226.528	3.66598	1.8742	7.43931e-09	2.27523e-07	Up	1.4925	1.40392	1.66536	4.90055	6.7464	4.67841	GeneID:109948939
LOC109948948	10.6108	2.02225	19.1993	9.49402	3.24702	0.00218045	0.0149932	Up	0	0	0.335211	1.7377	0.961876	0.495115	GeneID:109948948	Receptor-like protein EIX2	GO:0005886,GO:0016021,GO:0050832	plasma membrane|integral component of membrane|defense response to fungus
LOC109948952	304.633	516.712	92.5539	0.179121	-2.48099	1.67887e-24	3.00471e-22	Down	14.066	15.9629	15.3243	1.95962	2.35594	3.60777	GeneID:109948952	Berberine bridge enzyme-like 15	GO:0005576,GO:0005618,GO:0009506,GO:0009793,GO:0010197,GO:0045551,GO:0050268,GO:0052747,GO:0071949	extracellular region|cell wall|plasmodesma|embryo development ending in seed dormancy|polar nucleus fusion|cinnamyl-alcohol dehydrogenase activity|coniferyl-alcohol dehydrogenase activity|sinapyl alcohol dehydrogenase activity|FAD binding
LOC109948953	936.298	577.296	1295.3	2.24373	1.1659	2.34045e-07	5.13491e-06	Up	17.5929	17.1628	19.5681	32.4217	44.4395	42.0708	GeneID:109948953	Cold-responsive protein kinase 1	GO:0002237,GO:0004674,GO:0005524,GO:0005886,GO:0009409,GO:0009625,GO:0033160,GO:0046777,GO:0050826	response to molecule of bacterial origin|protein serine/threonine kinase activity|ATP binding|plasma membrane|response to cold|response to insect|positive regulation of protein import into nucleus, translocation|protein autophosphorylation|response to freezing
LOC109948957	33.6712	63.2017	4.14078	0.065517	-3.93199	6.043e-06	9.57419e-05	Down	0.839161	1.01194	0.343353	0.0355983	0.0695464	0.0338094	GeneID:109948957				ko04152	AMPK signaling pathway
LOC109948960	936.19	1611.95	260.429	0.161561	-2.62985	1.71493e-09	5.81542e-08	Down	35.4574	60.1747	38.5569	8.49685	5.82108	6.90543	GeneID:109948960	(-)-alpha-pinene synthase	GO:0000287,GO:0005829,GO:0010333,GO:0016114	magnesium ion binding|cytosol|terpene synthase activity|terpenoid biosynthetic process
LOC109948964	55.0762	25.6803	84.4721	3.28938	1.71782	3.7497e-05	0.000473094	Up	0.936931	1.20387	0.692409	3.09821	3.46929	2.51191	GeneID:109948964	Protein ENHANCED DISEASE RESISTANCE 4	GO:0005768,GO:0005886,GO:0006897,GO:0006952,GO:0009620,GO:0009863,GO:0030100,GO:1900150	endosome|plasma membrane|endocytosis|defense response|response to fungus|salicylic acid mediated signaling pathway|regulation of endocytosis|regulation of defense response to fungus
LOC109949022	132.201	39.8282	224.574	5.63857	2.49533	0.000319232	0.00296625	Up	1.88536	0.420822	1.39217	9.91117	3.4778	7.31116	GeneID:109949022	Vinorine synthase	GO:0009820,GO:0050636	alkaloid metabolic process|vinorine synthase activity
LOC109949024	99.3253	185.498	13.1526	0.0709042	-3.81798	3.46417e-24	6.08718e-22	Down	5.11374	5.6132	4.47531	0.309328	0.576849	0.160246	GeneID:109949024	Anaphase-promoting complex subunit 6	GO:0005634,GO:0007049,GO:0010087,GO:0016567,GO:0032875,GO:0051301	nucleus|cell cycle|phloem or xylem histogenesis|protein ubiquitination|regulation of DNA endoreduplication|cell division	ko04114,ko04110,ko04120,ko04111,ko04113	Oocyte meiosis|Cell cycle|Ubiquitin mediated proteolysis|Cell cycle - yeast|Meiosis - yeast
LOC109949032	42.2223	21.4044	63.0402	2.9452	1.55837	0.000656677	0.00551147	Up	0.464484	0.473944	0.634131	2.02294	0.938627	1.60908	GeneID:109949032	Anaphase-promoting complex subunit 6	GO:0005634,GO:0007049,GO:0010087,GO:0016567,GO:0032875,GO:0051301	nucleus|cell cycle|phloem or xylem histogenesis|protein ubiquitination|regulation of DNA endoreduplication|cell division	ko04114,ko04110,ko04120,ko04111,ko04113	Oocyte meiosis|Cell cycle|Ubiquitin mediated proteolysis|Cell cycle - yeast|Meiosis - yeast
LOC109949080	148.496	39.7134	257.279	6.4784	2.69564	1.6879e-07	3.88399e-06	Up	0.780521	0.705917	0.745173	3.39936	6.18835	4.47594	GeneID:109949080	Putative receptor protein kinase ZmPK1	GO:0004674,GO:0005524,GO:0005886,GO:0006468,GO:0016021,GO:0048544	protein serine/threonine kinase activity|ATP binding|plasma membrane|protein phosphorylation|integral component of membrane|recognition of pollen
LOC109949092	438.662	591.572	285.753	0.48304	-1.04979	6.8e-07	1.33439e-05	Down	36.5005	32.2586	38.8756	17.086	20.9084	12.8393	GeneID:109949092	Glutathione S-transferase U10	GO:0004364,GO:0005737,GO:0005829,GO:0006749,GO:0009407	glutathione transferase activity|cytoplasm|cytosol|glutathione metabolic process|toxin catabolic process	ko00982,ko00480,ko00980	Drug metabolism - cytochrome P450|Glutathione metabolism|Metabolism of xenobiotics by cytochrome P450
LOC109949107	4.30878	8.61756	0	0	#NAME?	0.00410698	0.024987	Down	0.240628	0.188868	0.0777548	0	0	0	GeneID:109949107
LOC109949122	10.7496	2.97013	18.5291	6.23846	2.64119	0.00507272	0.0296136	Up	0.0266273	0.0543393	0.167781	0.376898	0.594724	0.550705	GeneID:109949122	Cytochrome P450 CYP749A22	GO:0004497,GO:0005506,GO:0016021,GO:0016705,GO:0020037	monooxygenase activity|iron ion binding|integral component of membrane|oxidoreductase activity, acting on paired donors, with incorporation or reduction of molecular oxygen|heme binding	ko00905	Brassinosteroid biosynthesis
LOC109949126	159.868	244.54	75.1971	0.307504	-1.70132	2.10098e-08	5.89403e-07	Down	15.7955	20.7964	12.9093	5.2011	5.62248	4.01766	GeneID:109949126	tRNAse Z TRZ4, mitochondrial	GO:0005739,GO:0042780,GO:0042781,GO:0046872,GO:0072684	mitochondrion|tRNA 3'-end processing|3'-tRNA processing endoribonuclease activity|metal ion binding|mitochondrial tRNA 3'-trailer cleavage, endonucleolytic
LOC109949142	245.22	369.003	121.438	0.329097	-1.60341	3.84321e-08	1.019e-06	Down	18.9895	22.7885	27.9696	9.62279	5.20798	7.78071	GeneID:109949142
LOC109949147	124.688	166.892	82.4843	0.494238	-1.01672	0.000569634	0.00488052	Down	5.24466	6.30711	4.9833	2.61729	2.55663	2.8086	GeneID:109949147	Diacylglycerol kinase 1	GO:0003951,GO:0005509,GO:0005524,GO:0005622,GO:0006952,GO:0007205,GO:0016021,GO:0035556	NAD+ kinase activity|calcium ion binding|ATP binding|intracellular|defense response|protein kinase C-activating G protein-coupled receptor signaling pathway|integral component of membrane|intracellular signal transduction
LOC109949164	417.397	18.3064	816.488	44.6011	5.47901	9.29685e-28	1.95325e-25	Up	0.41079	0.523947	1.04256	29.8928	34.989	21.6647	GeneID:109949164	Probable S-adenosylmethionine-dependent methyltransferase At5g37990	GO:0008168,GO:0046872	methyltransferase activity|metal ion binding
LOC109949165	54.4646	2.54819	106.381	41.7478	5.38363	8.02733e-19	8.9688e-17	Up	0.0466836	0.285807	0.0490264	6.45537	5.41202	3.57238	GeneID:109949165	Probable S-adenosylmethionine-dependent methyltransferase At5g37990	GO:0008168,GO:0046872	methyltransferase activity|metal ion binding
LOC109949170	422.47	14.2624	830.678	58.2427	5.864	6.54374e-39	2.43238e-36	Up	0.468762	0.515103	0.643759	39.1825	29.3002	24.722	GeneID:109949170	Probable S-adenosylmethionine-dependent methyltransferase At5g38100	GO:0008168,GO:0046872	methyltransferase activity|metal ion binding
LOC109949210	11.403	0	22.806	Inf	Inf	2.47904e-07	5.40218e-06	Up	0	0	0	1.12303	0.548499	1.14864	GeneID:109949210	Putative F-box/LRR-repeat protein 8	GO:0004842,GO:0006511,GO:0019005,GO:0031146	ubiquitin-protein transferase activity|ubiquitin-dependent protein catabolic process|SCF ubiquitin ligase complex|SCF-dependent proteasomal ubiquitin-dependent protein catabolic process
LOC109949217	435.323	92.0188	778.628	8.46161	3.08093	1.10689e-12	6.06094e-11	Up	7.83908	10.0854	6.97971	60.3964	86.9996	57.5377	GeneID:109949217
LOC109949245	5.762	11.524	0	0	#NAME?	0.00398621	0.0244601	Down	0.408035	0.260216	1.17841	0	0	0	GeneID:109949245	Receptor-like serine/threonine-protein kinase SD1-8
LOC109949254	29.4347	13.8625	45.0068	3.24665	1.69895	0.00183652	0.0131377	Up	1.42145	1.4504	1.29375	6.19077	2.82207	4.31177	GeneID:109949254
LOC109949275	10.0712	20.1424	0	0	#NAME?	2.16696e-06	3.76631e-05	Down	0.574698	0.331446	0.682261	0	0	0	GeneID:109949275
LOC109949289	13.7813	2.52783	25.0348	9.9037	3.30797	0.000186087	0.00186812	Up	0.0346222	0.0588789	0	0.414667	0.294587	0.190948	GeneID:109949289
LOC109949291	13.0984	1.58124	24.6155	15.5672	3.96043	0.00216815	0.0149246	Up	0.505972	0	0	4.62763	1.82968	1.36038	GeneID:109949291
LOC109949316	30.8802	61.7603	0	0	#NAME?	1.25961e-14	8.72654e-13	Down	0.565357	1.21143	0.994496	0	0	0	GeneID:109949316
LOC109949377	34.3288	59.4127	9.24487	0.155604	-2.68405	7.57448e-07	1.46554e-05	Down	1.57304	1.2367	2.03113	0.224623	0.246844	0.266669	GeneID:109949377
LOC109949382	216.221	299.174	133.268	0.445453	-1.16666	3.18884e-06	5.3458e-05	Down	7.10793	7.91877	7.89626	3.36945	3.36849	3.25013	GeneID:109949382
LOC109949439	770.262	428.143	1112.38	2.59815	1.37749	6.76271e-07	1.32842e-05	Up	10.8121	15.0086	25.8389	40.1424	49.3706	41.9575	GeneID:109949439
LOC109949448	164.72	236.213	93.2274	0.394674	-1.34127	8.03864e-07	1.54368e-05	Down	30.3501	29.5606	26.1988	9.63827	11.8603	11.6505	GeneID:109949448	THO complex subunit 3	GO:0000347,GO:0000445,GO:0003723,GO:0006397,GO:0006406,GO:0008380,GO:0010267,GO:0031047,GO:0080008	THO complex|THO complex part of transcription export complex|RNA binding|mRNA processing|mRNA export from nucleus|RNA splicing|production of ta-siRNAs involved in RNA interference|gene silencing by RNA|Cul4-RING E3 ubiquitin ligase complex	ko03040,ko03013	Spliceosome|RNA transport
LOC109949460	259.692	114.612	404.772	3.53166	1.82035	7.45157e-14	4.80105e-12	Up	2.26332	1.82906	2.47198	7.47185	7.89567	7.3398	GeneID:109949460	G-type lectin S-receptor-like serine/threonine-protein kinase LECRK3	GO:0004674,GO:0005524,GO:0006952,GO:0016021,GO:0030246	protein serine/threonine kinase activity|ATP binding|defense response|integral component of membrane|carbohydrate binding
LOC109949466	30.5014	53.1592	7.84356	0.147548	-2.76074	7.48575e-06	0.000115109	Down	1.4496	1.07573	0.652435	0.122988	0.120137	0.214147	GeneID:109949466	G-type lectin S-receptor-like serine/threonine-protein kinase RLK1
LOC109949471	88.4402	117.963	58.9176	0.499458	-1.00156	0.00248351	0.0167144	Down	3.82012	3.25755	3.12349	1.69347	2.23464	1.04403	GeneID:109949471
LOC109949489	37.8266	0.969107	74.684	77.0648	6.268	3.24005e-18	3.38524e-16	Up	0.0349885	0.0357012	0.0367444	2.62862	2.75376	2.71362	GeneID:109949489
LOC109949491	121.5	35.7118	207.289	5.80448	2.53717	1.62779e-15	1.24855e-13	Up	1.31267	1.07153	0.919033	7.05099	5.58452	6.1537	GeneID:109949491	Putative 4-hydroxy-4-methyl-2-oxoglutarate aldolase 3	GO:0008428,GO:0008948,GO:0046872,GO:0047443,GO:0051252	ribonuclease inhibitor activity|oxaloacetate decarboxylase activity|metal ion binding|4-hydroxy-4-methyl-2-oxoglutarate aldolase activity|regulation of RNA metabolic process
LOC109949495	13.662	1.9798	25.3441	12.8014	3.67823	4.95582e-05	0.000600195	Up	0	0.0565058	0.116314	1.05518	0.647884	0.486762	GeneID:109949495	UDP-glycosyltransferase 86A1	GO:0008194,GO:0043231,GO:0080043,GO:0080044	UDP-glycosyltransferase activity|intracellular membrane-bounded organelle|quercetin 3-O-glucosyltransferase activity|quercetin 7-O-glucosyltransferase activity
LOC109949500	24.3497	7.95994	40.7395	5.11807	2.3556	0.00456166	0.0272277	Up	0.0273233	0.278798	0.0430417	0.520624	0.857283	0.33906	GeneID:109949500	Putative disease resistance RPP13-like protein 1
LOC109949526	60.6235	14.3265	106.92	7.46313	2.89978	9.36108e-12	4.54624e-10	Up	0.254401	0.185416	0.381668	1.74111	2.51248	1.74757	GeneID:109949526	G-type lectin S-receptor-like serine/threonine-protein kinase LECRK2	GO:0004674,GO:0005524,GO:0006952,GO:0016021,GO:0030246	protein serine/threonine kinase activity|ATP binding|defense response|integral component of membrane|carbohydrate binding
LOC109949539	180.931	80.6598	281.203	3.48628	1.80169	2.4241e-11	1.0922e-09	Up	2.18584	3.46205	2.70667	10.0527	10.7219	7.65828	GeneID:109949539
LOC109949543	7.51458	0	15.0292	Inf	Inf	4.63299e-05	0.000567138	Up	0	0	0	0.285344	0.329408	0.492736	GeneID:109949543	Cyclic nucleotide-gated ion channel 1	GO:0005216,GO:0005516,GO:0005886,GO:0016021,GO:0030552,GO:0030553	ion channel activity|calmodulin binding|plasma membrane|integral component of membrane|cAMP binding|cGMP binding
LOC109949544	16.226	0.315816	32.1362	101.756	6.66897	5.14058e-09	1.62357e-07	Up	0	0.0797088	0	2.89189	2.24327	2.66579	GeneID:109949544	Mediator of RNA polymerase II transcription subunit 15a	GO:0003713,GO:0005634,GO:0009751,GO:0016592,GO:0031490,GO:0045723	transcription coactivator activity|nucleus|response to salicylic acid|mediator complex|chromatin DNA binding|positive regulation of fatty acid biosynthetic process
LOC109949551	18.9238	0.315816	37.5319	118.841	6.89289	1.98697e-10	7.88628e-09	Up	0	0.0690668	0	2.57949	3.45559	1.8199	GeneID:109949551
LOC109949554	39.6186	23.0454	56.1919	2.43831	1.28588	0.00598639	0.0339428	Up	0.350097	0.580495	0.666394	1.45329	1.2567	1.10873	GeneID:109949554	Two-component response regulator ORR23	GO:0000160,GO:0003677,GO:0003700,GO:0005634,GO:0009736	phosphorelay signal transduction system|DNA binding|DNA-binding transcription factor activity|nucleus|cytokinin-activated signaling pathway
LOC109949569	363.474	489.387	237.56	0.485424	-1.04268	2.32025e-06	3.99717e-05	Down	32.8012	30.8605	33.0065	13.308	13.9281	18.6365	GeneID:109949569	Negative cofactor 2 complex subunit beta	GO:0000122,GO:0001047,GO:0003714,GO:0005634,GO:0005671,GO:0005829,GO:0006338,GO:0017025,GO:0017054,GO:0045898,GO:0045944,GO:0046982,GO:0051123	negative regulation of transcription by RNA polymerase II|core promoter binding|transcription corepressor activity|nucleus|Ada2/Gcn5/Ada3 transcription activator complex|cytosol|chromatin remodeling|TBP-class protein binding|negative cofactor 2 complex|regulation of RNA polymerase II transcriptional preinitiation complex assembly|positive regulation of transcription by RNA polymerase II|protein h…	ko03030,ko03420,ko00230,ko00240,ko03410	DNA replication|Nucleotide excision repair|Purine metabolism|Pyrimidine metabolism|Base excision repair
LOC109949636	5.8589	11.0388	0.679006	0.0615109	-4.02302	0.00762112	0.0411126	Down	0.466073	0.581248	0.761386	0.11277	0	0	GeneID:109949636	Protein FAR1-RELATED SEQUENCE 5	GO:0005634,GO:0006355,GO:0008270	nucleus|regulation of transcription, DNA-templated|zinc ion binding
LOC109949671	6.88728	13.4219	0.352612	0.0262713	-5.25037	0.000723808	0.00600192	Down	0.734759	0.499817	0.257211	0	0.037213	0	GeneID:109949671
LOC109949690	51.247	75.7398	26.7542	0.353239	-1.50128	0.000385314	0.00349167	Down	3.34874	3.13883	2.86251	0.932736	1.20102	1.0872	GeneID:109949690	Protein FAR1-RELATED SEQUENCE 5	GO:0005634,GO:0006355,GO:0008270	nucleus|regulation of transcription, DNA-templated|zinc ion binding
LOC109949737	25.5736	6.8262	44.321	6.49279	2.69884	1.1487e-05	0.000167824	Up	0.237543	0.173129	0.320739	1.92132	1.04667	1.7195	GeneID:109949737	Putative disease resistance protein RGA1	GO:0005524,GO:0006952,GO:0043531	ATP binding|defense response|ADP binding
LOC109949741	21.6617	1.64276	41.6806	25.3723	4.66518	4.26722e-09	1.3566e-07	Up	0	0.0831689	0.128399	1.77495	2.34065	1.13789	GeneID:109949741
LOC109949748	7.36786	0	14.7357	Inf	Inf	5.7384e-05	0.00068341	Up	0	0	0	2.02716	2.28481	2.22149	GeneID:109949748	Zinc finger CCCH domain-containing protein 1	GO:0003677,GO:0005684,GO:0034247,GO:0046872	DNA binding|U2-type spliceosomal complex|snoRNA splicing|metal ion binding
LOC109949772	51.4723	75.2658	27.6787	0.367746	-1.44322	0.00297401	0.0192837	Down	1.31618	2.24693	2.47207	0.468506	1.21142	0.471138	GeneID:109949772	Retrovirus-related Pol polyprotein from transposon TNT 1-94	GO:0000943,GO:0003676,GO:0003964,GO:0004190,GO:0004519,GO:0008270,GO:0015074	retrotransposon nucleocapsid|nucleic acid binding|RNA-directed DNA polymerase activity|aspartic-type endopeptidase activity|endonuclease activity|zinc ion binding|DNA integration
LOC109949800	1001.78	443.146	1560.42	3.52123	1.81608	1.03792e-11	4.97814e-10	Up	14.7154	11.0315	12.558	55.7361	37.8642	39.0451	GeneID:109949800	Linamarin synthase 2	GO:0006952,GO:0050057	defense response|linamarin synthase activity
LOC109949801	141.576	191.002	92.151	0.482461	-1.05152	0.000178437	0.00180765	Down	5.5884	5.54812	4.12406	2.41196	2.94507	1.82219	GeneID:109949801
LOC109949802	9.15705	1.265	17.0491	13.4776	3.75249	0.000948956	0.00750813	Up	0.434247	0	0	2.00946	1.38557	2.35754	GeneID:109949802
LOC109949814	6.12596	0	12.2519	Inf	Inf	0.00112065	0.0086368	Up	0	0	0	1.29469	0.287429	0.503032	GeneID:109949814
LOC109949853	334.766	545.127	124.405	0.228213	-2.13155	2.19619e-16	1.87833e-14	Down	13.1859	14.9921	18.2562	3.98479	3.46312	2.94972	GeneID:109949853	G-type lectin S-receptor-like serine/threonine-protein kinase LECRK3	GO:0004674,GO:0005524,GO:0005886,GO:0006468,GO:0006952,GO:0016021,GO:0030246	protein serine/threonine kinase activity|ATP binding|plasma membrane|protein phosphorylation|defense response|integral component of membrane|carbohydrate binding
LOC109949862	15.3429	1.30658	29.3793	22.4856	4.49093	1.21852e-06	2.24312e-05	Up	0.049607	0	0.0520965	0.540127	0.685891	1.02597	GeneID:109949862
LOC109949864	87.2607	138.06	36.4612	0.264097	-1.92086	5.44886e-06	8.72584e-05	Down	7.94484	6.29871	10.6845	1.80477	1.58057	3.07352	GeneID:109949864
LOC109949879	9.45908	18.9182	0	0	#NAME?	4.4738e-06	7.29074e-05	Down	1.03065	1.25196	0.670043	0	0	0	GeneID:109949879
LOC109949909	146.857	2.95021	290.764	98.5573	6.62289	3.74553e-55	2.68138e-52	Up	0.140439	0	0.184358	10.8949	10.4184	10.3475	GeneID:109949909
LOC109949929	858.467	1316.39	400.548	0.304279	-1.71653	1.29695e-18	1.4325e-16	Down	48.7865	50.9647	42.8092	16.5045	14.6333	11.3327	GeneID:109949929	Protein SRG1	GO:0010150,GO:0016682,GO:0046872,GO:0051213	leaf senescence|oxidoreductase activity, acting on diphenols and related substances as donors, oxygen as acceptor|metal ion binding|dioxygenase activity
LOC109949931	301.923	440.813	163.033	0.369845	-1.43501	5.0602e-10	1.87732e-08	Down	30.0742	33.1626	26.0849	8.06463	12.6994	11.357	GeneID:109949931
LOC109950005	394.881	259.374	530.388	2.04487	1.03201	1.74875e-06	3.10677e-05	Up	9.81477	7.97722	9.98743	20.0832	19.2937	16.3091	GeneID:109950005	Protein SRG1	GO:0010150,GO:0016682,GO:0046872,GO:0051213	leaf senescence|oxidoreductase activity, acting on diphenols and related substances as donors, oxygen as acceptor|metal ion binding|dioxygenase activity
LOC109950014	209.717	304.087	115.347	0.379321	-1.39851	2.34711e-07	5.14367e-06	Down	3.79649	3.16312	2.50347	1.44198	0.855568	1.22749	GeneID:109950014	G-type lectin S-receptor-like serine/threonine-protein kinase RLK1
LOC109950035	61.4703	6.84569	116.095	16.9588	4.08397	1.72039e-18	1.8894e-16	Up	0.0408309	0.1111	0.142933	1.73383	1.88183	1.28077	GeneID:109950035	G-type lectin S-receptor-like serine/threonine-protein kinase LECRK3	GO:0004674,GO:0005524,GO:0006952,GO:0016021,GO:0030246	protein serine/threonine kinase activity|ATP binding|defense response|integral component of membrane|carbohydrate binding
LOC109950043	16.7355	1.34817	32.1228	23.827	4.57452	2.65051e-07	5.72422e-06	Up	0	0	0.302086	1.72259	2.21805	3.19768	GeneID:109950043
LOC109950044	47.5169	84.0403	10.9936	0.130814	-2.93441	6.07728e-10	2.22477e-08	Down	8.79462	8.88577	5.34237	1.22043	1.10044	0.624133	GeneID:109950044
LOC109950125	203.129	298.012	108.245	0.363223	-1.46107	1.42624e-08	4.13311e-07	Down	17.359	20.0146	21.7841	6.6869	7.13178	7.19334	GeneID:109950125
LOC109950128	155.502	284.155	26.8491	0.0944876	-3.40373	6.37794e-28	1.35472e-25	Down	5.9599	6.72143	5.00308	0.704421	0.667244	0.263555	GeneID:109950128
LOC109950139	166.615	58.1892	275.041	4.72666	2.24082	6.05634e-13	3.47368e-11	Up	1.03639	0.798518	2.04352	6.40212	6.81613	4.81184	GeneID:109950139
LOC109950141	173.598	56.5929	290.602	5.13496	2.36035	8.46446e-15	5.97115e-13	Up	2.47627	1.79529	1.57401	10.1817	11.3665	7.78321	GeneID:109950141	Vinorine synthase	GO:0009820,GO:0050636	alkaloid metabolic process|vinorine synthase activity
LOC109950147	294.835	183.126	406.544	2.22002	1.15057	6.33212e-07	1.25275e-05	Up	6.30015	5.57943	5.36795	10.9043	12.2003	14.2899	GeneID:109950147	Vinorine synthase	GO:0009820,GO:0050636	alkaloid metabolic process|vinorine synthase activity
LOC109950165	19.106	33.3911	4.82099	0.144379	-2.79206	9.88223e-05	0.00108778	Down	1.74155	2.12255	1.2701	0.0526727	0.360164	0.300155	GeneID:109950165	Golgin candidate 5	GO:0005794	Golgi apparatus
LOC109950169	60.3029	9.03431	111.571	12.3497	3.62641	1.03781e-15	8.25504e-14	Up	0.0598564	1.09936	0.565742	7.49483	7.70309	5.50887	GeneID:109950169	tRNAse Z TRZ4, mitochondrial	GO:0005739,GO:0042780,GO:0042781,GO:0046872,GO:0072684	mitochondrion|tRNA 3'-end processing|3'-tRNA processing endoribonuclease activity|metal ion binding|mitochondrial tRNA 3'-trailer cleavage, endonucleolytic
LOC109950190	6.12158	12.2432	0	0	#NAME?	0.000374022	0.00339571	Down	0.509788	0.18206	0.294454	0	0	0	GeneID:109950190	Retrovirus-related Pol polyprotein from transposon RE1	GO:0000943,GO:0003676,GO:0003964,GO:0004190,GO:0004519,GO:0006310,GO:0015074,GO:0046872	retrotransposon nucleocapsid|nucleic acid binding|RNA-directed DNA polymerase activity|aspartic-type endopeptidase activity|endonuclease activity|DNA recombination|DNA integration|metal ion binding
LOC109950226	39.9916	75.0467	4.93657	0.06578	-3.92621	1.38574e-12	7.44028e-11	Down	1.06303	0.89397	0.821948	0	0.173941	0	GeneID:109950226	IAA-amino acid hydrolase ILR1-like 1	GO:0005788,GO:0016787	endoplasmic reticulum lumen|hydrolase activity
LOC109950259	33.9747	50.4308	17.5185	0.347377	-1.52543	0.00272537	0.0179423	Down	2.89705	4.58189	4.10729	0.946303	1.61765	1.34813	GeneID:109950259
LOC109950265	184.169	52.9864	315.352	5.95158	2.57327	0.00160375	0.0117135	Up	2.0058	1.79965	1.99751	7.86972	17.6183	8.04646	GeneID:109950265	GDSL esterase/lipase 5	GO:0005576,GO:0016042,GO:0016298	extracellular region|lipid catabolic process|lipase activity
LOC109950286	8.2803	16.5606	0	0	#NAME?	2.03764e-05	0.000279727	Down	1.27255	1.09071	0.320739	0	0	0	GeneID:109950286
LOC109950342	7.7208	15.4416	0	0	#NAME?	4.47017e-05	0.000550343	Down	0.407762	0.554756	0.371128	0	0	0	GeneID:109950342	Microtubule-associated protein 70-2	GO:0005737,GO:0005874,GO:0007010,GO:0008017	cytoplasm|microtubule|cytoskeleton organization|microtubule binding
LOC109950416	47.2705	26.8166	67.7244	2.52547	1.33655	0.00251827	0.0168837	Up	2.96978	4.65363	1.44802	7.50642	9.02454	5.70337	GeneID:109950416	Probable cyclic nucleotide-gated ion channel 10	GO:0005216,GO:0005516,GO:0005886,GO:0016021,GO:0030552,GO:0030553	ion channel activity|calmodulin binding|plasma membrane|integral component of membrane|cAMP binding|cGMP binding
LOC109950420	3341.51	5317.92	1365.1	0.256698	-1.96186	0.000574507	0.00491573	Down	428.702	714.239	312.597	103.946	156.738	101.478	GeneID:109950420
LOC109950421	1931.91	2906.12	957.694	0.329544	-1.60146	3.23811e-07	6.84038e-06	Down	377.681	399.895	248.933	77.8383	136.223	114.167	GeneID:109950421
LOC109950471	392.809	570.741	214.877	0.376488	-1.40932	7.42338e-06	0.000114423	Down	30.0638	28.6052	17.9844	8.51726	10.7933	8.78887	GeneID:109950471	Cyclin-dependent kinase inhibitor 7	GO:0001673,GO:0004861,GO:0005654,GO:0007050,GO:0045736	male germ cell nucleus|cyclin-dependent protein serine/threonine kinase inhibitor activity|nucleoplasm|cell cycle arrest|negative regulation of cyclin-dependent protein serine/threonine kinase activity
LOC109950545	34.9653	0	69.9307	Inf	Inf	4.36427e-15	3.18329e-13	Up	0	0	0	5.09295	7.38213	3.82281	GeneID:109950545	Vinorine synthase	GO:0009820,GO:0050636	alkaloid metabolic process|vinorine synthase activity
LOC109950561	24.1408	11.8429	36.4387	3.07685	1.62145	0.00737581	0.040136	Up	0.983071	0.429898	0.344135	1.98785	2.09114	1.21023	GeneID:109950561
LOC109950579	26.2132	11.5032	40.9232	3.55755	1.83088	0.0016895	0.01224	Up	0.954173	0.973608	0.400823	2.56266	2.02967	3.48637	GeneID:109950579	TMV resistance protein N	GO:0005524,GO:0005737,GO:0007165,GO:0009626,GO:0043531	ATP binding|cytoplasm|signal transduction|plant-type hypersensitive response|ADP binding
LOC109950643	55.1015	77.7733	32.4297	0.416977	-1.26196	0.00213514	0.0147499	Down	2.61285	4.25635	4.42886	1.59714	1.21884	1.80129	GeneID:109950643
LOC109950659	336.09	164.796	507.385	3.07887	1.6224	9.08877e-13	5.07737e-11	Up	4.3912	2.09485	3.41376	10.4317	9.21945	10.281	GeneID:109950659	Sugar transporter ERD6-like 7	GO:0005351,GO:0005355,GO:0005773,GO:0005774,GO:0005887,GO:0006829,GO:0008645,GO:0009507,GO:0009705	carbohydrate:proton symporter activity|glucose transmembrane transporter activity|vacuole|vacuolar membrane|integral component of plasma membrane|zinc ion transport|hexose transmembrane transport|chloroplast|plant-type vacuole membrane
LOC109950683	442.367	598.164	286.571	0.479084	-1.06165	4.90222e-07	9.98472e-06	Down	46.9255	50.2072	51.8393	16.3464	29.2598	23.8157	GeneID:109950683
LOC109950686	24.4726	44.5083	4.43699	0.099689	-3.32642	8.04226e-07	1.54368e-05	Down	1.35436	2.99423	2.03868	0.29493	0.144047	0.18674	GeneID:109950686
LOC109950744	4.3151	0	8.63021	Inf	Inf	0.00373663	0.0232325	Up	0	0	0	0.261616	0.664437	0.347858	GeneID:109950744
LOC109950750	4072.47	7178.02	966.924	0.134706	-2.89211	1.03398e-18	1.14861e-16	Down	227.073	205.164	292.885	33.6006	32.9238	29.2693	GeneID:109950750	Antisense-enhancing sequence 1	GO:0003824,GO:0005634,GO:0005829,GO:0009058,GO:0016853,GO:0031048	catalytic activity|nucleus|cytosol|biosynthetic process|isomerase activity|chromatin silencing by small RNA
LOC109950758	63.9284	31.6175	96.2393	3.04386	1.6059	3.60955e-05	0.000458403	Up	0.882409	1.84169	1.30579	4.14881	4.77787	3.02783	GeneID:109950758
LOC109950788	25.64	0	51.28	Inf	Inf	3.18322e-15	2.38482e-13	Up	0	0	0	2.90226	2.4948	3.08719	GeneID:109950788	TMV resistance protein N	GO:0005524,GO:0005737,GO:0007165,GO:0009626,GO:0043531	ATP binding|cytoplasm|signal transduction|plant-type hypersensitive response|ADP binding
LOC109950844	52.0295	27.8113	76.2477	2.74161	1.45502	0.000576297	0.00492887	Up	4.36476	3.76849	1.763	9.62667	7.7371	9.14292	GeneID:109950844
LOC18765975	97.0991	192.134	2.06444	0.0107448	-6.54022	5.50195e-11	2.37913e-09	Down	10.1781	9.47096	19.1593	0	0.204249	0.198588	GeneID:18765975	Protein ACCELERATED CELL DEATH 6	GO:0005887,GO:0008219,GO:0009416,GO:0009615,GO:0009617,GO:0009751,GO:0009816,GO:0016020,GO:0016567,GO:0030176,GO:0050826,GO:0071446,GO:1900150,GO:1900426,GO:1902290,GO:2000031	integral component of plasma membrane|cell death|response to light stimulus|response to virus|response to bacterium|response to salicylic acid|defense response to bacterium, incompatible interaction|membrane|protein ubiquitination|integral component of endoplasmic reticulum membrane|response to freezing|cellular response to salicylic acid stimulus|regulation of defense response to fungus|positive…
LOC18765976	135.763	88.657	182.87	2.06267	1.04451	0.000262405	0.00250538	Up	1.87981	1.45775	1.93466	3.37715	3.55879	3.71286	GeneID:18765976	Probable L-type lectin-domain containing receptor kinase VII.2
LOC18765981	4.43242	0	8.86484	Inf	Inf	0.00307064	0.0197841	Up	0	0	0	0.645087	0.225049	0.306336	GeneID:18765981	Probable aminotransferase TAT2	GO:0004838,GO:0005829,GO:0006572,GO:0010189,GO:0030170	L-tyrosine:2-oxoglutarate aminotransferase activity|cytosol|tyrosine catabolic process|vitamin E biosynthetic process|pyridoxal phosphate binding	ko00400,ko00130,ko00950,ko00350,ko01230,ko00401,ko00960,ko00270,ko00360	Phenylalanine, tyrosine and tryptophan biosynthesis|Ubiquinone and other terpenoid-quinone biosynthesis|Isoquinoline alkaloid biosynthesis|Tyrosine metabolism|Biosynthesis of amino acids|Novobiocin biosynthesis|Tropane, piperidine and pyridine alkaloid biosynthesis|Cysteine and methionine metabolism|Phenylalanine metabolism
LOC18766002	194.304	94.0921	294.517	3.13009	1.6462	8.38332e-05	0.000944887	Up	2.55536	1.92948	3.11298	5.48115	9.83852	7.87464	GeneID:18766002	UPF0481 protein At3g47200	GO:0005886,GO:0016021	plasma membrane|integral component of membrane
LOC18766007	5.26073	0	10.5215	Inf	Inf	0.000971032	0.00765772	Up	0	0	0	0.430482	0.129386	0.4403	GeneID:18766007	O-acyltransferase WSD1	GO:0004144,GO:0005783,GO:0005789,GO:0005886,GO:0010025,GO:0016021,GO:0019432,GO:0047196,GO:0102966,GO:0103095	diacylglycerol O-acyltransferase activity|endoplasmic reticulum|endoplasmic reticulum membrane|plasma membrane|wax biosynthetic process|integral component of membrane|triglyceride biosynthetic process|long-chain-alcohol O-fatty-acyltransferase activity|arachidoyl-CoA:1-dodecanol O-acyltransferase activity|wax ester synthase activity
LOC18766013	391.478	137.926	645.031	4.67665	2.22548	1.60607e-05	0.000227094	Up	4.73864	4.15928	13.217	22.5242	42.1618	36.5673	GeneID:18766013	Transcription factor bHLH162	GO:0000977,GO:0003700,GO:0006355,GO:0006357,GO:0008134,GO:0046983,GO:0050832,GO:0090575	RNA polymerase II regulatory region sequence-specific DNA binding|DNA-binding transcription factor activity|regulation of transcription, DNA-templated|regulation of transcription by RNA polymerase II|transcription factor binding|protein dimerization activity|defense response to fungus|RNA polymerase II transcription factor complex
LOC18766021	52.9772	86.4303	19.5241	0.225895	-2.14628	3.48515e-05	0.000445532	Down	2.78134	4.77977	5.79058	1.22197	0.934157	0.807348	GeneID:18766021	GPI-anchored protein LLG1	GO:0005886,GO:0031225,GO:0045927,GO:0090406	plasma membrane|anchored component of membrane|positive regulation of growth|pollen tube
LOC18766039	11.6536	0	23.3071	Inf	Inf	1.87086e-07	4.24434e-06	Up	0	0	0	0.959155	0.71077	0.534009	GeneID:18766039	O-acyltransferase WSD1	GO:0004144,GO:0005783,GO:0005789,GO:0005886,GO:0010025,GO:0016021,GO:0019432,GO:0047196,GO:0102966,GO:0103095	diacylglycerol O-acyltransferase activity|endoplasmic reticulum|endoplasmic reticulum membrane|plasma membrane|wax biosynthetic process|integral component of membrane|triglyceride biosynthetic process|long-chain-alcohol O-fatty-acyltransferase activity|arachidoyl-CoA:1-dodecanol O-acyltransferase activity|wax ester synthase activity
LOC18766075	100.034	193.571	6.49626	0.03356	-4.89711	5.0515e-32	1.43589e-29	Down	5.42418	5.03404	6.24026	0.267102	0.144951	0.140933	GeneID:18766075	Protein ACCELERATED CELL DEATH 6	GO:0005887,GO:0008219,GO:0009416,GO:0009615,GO:0009617,GO:0009751,GO:0009816,GO:0016020,GO:0016567,GO:0030176,GO:0050826,GO:0071446,GO:1900150,GO:1900426,GO:1902290,GO:2000031	integral component of plasma membrane|cell death|response to light stimulus|response to virus|response to bacterium|response to salicylic acid|defense response to bacterium, incompatible interaction|membrane|protein ubiquitination|integral component of endoplasmic reticulum membrane|response to freezing|cellular response to salicylic acid stimulus|regulation of defense response to fungus|positive…
LOC18766180	295.862	397.895	193.829	0.487136	-1.0376	6.6942e-06	0.000104771	Down	8.29406	7.28123	7.96481	4.495	3.5365	3.22599	GeneID:18766180	BTB/POZ domain-containing protein At5g48800	GO:0005886,GO:0016567	plasma membrane|protein ubiquitination
LOC18766182	159.537	105.53	213.544	2.02354	1.01688	0.000175443	0.00178203	Up	1.86899	1.64935	2.10424	3.64829	3.54583	3.95249	GeneID:18766182	Putative disease resistance protein At1g50180
LOC18766186	166.912	76.6626	257.162	3.35447	1.74609	2.4637e-10	9.62036e-09	Up	1.21564	1.44713	1.12934	4.5817	4.30975	3.54564	GeneID:18766186	Eukaryotic translation initiation factor isoform 4G-1	GO:0003729,GO:0003743,GO:0005634,GO:0005737,GO:0005829,GO:0006417,GO:0016281	mRNA binding|translation initiation factor activity|nucleus|cytoplasm|cytosol|regulation of translation|eukaryotic translation initiation factor 4F complex
LOC18766212	47.1794	27.9988	66.36	2.3701	1.24495	0.0038055	0.0235985	Up	0.384545	0.345292	0.629995	0.803898	1.03066	1.32022	GeneID:18766212	Disease resistance protein RPS2
LOC18766224	629.593	374.59	884.595	2.3615	1.2397	2.93354e-05	0.000380553	Up	9.81421	11.9301	8.04555	18.6457	27.8795	21.8511	GeneID:18766224
LOC18766250	21.4714	8.91129	34.0315	3.81892	1.93316	0.00273606	0.0179882	Up	0.584573	0.759156	0.16743	2.4881	1.01739	2.14325	GeneID:18766250	Protein DMR6-LIKE OXYGENASE 1	GO:0002229,GO:0002239,GO:0009617,GO:0009620,GO:0009751,GO:0010150,GO:0046244,GO:0046872,GO:0051213	defense response to oomycetes|response to oomycetes|response to bacterium|response to fungus|response to salicylic acid|leaf senescence|salicylic acid catabolic process|metal ion binding|dioxygenase activity
LOC18766262	122.589	53.2805	191.897	3.60163	1.84865	1.34769e-09	4.68516e-08	Up	1.87894	1.8163	1.86938	7.5372	5.1187	7.0221	GeneID:18766262	Probable fructokinase-3	GO:0005524,GO:0005829,GO:0006000,GO:0008865,GO:0019200,GO:0019252	ATP binding|cytosol|fructose metabolic process|fructokinase activity|carbohydrate kinase activity|starch biosynthetic process
LOC18766294	509.606	690.86	328.353	0.475282	-1.07315	3.10123e-05	0.000400158	Down	11.5326	16.0941	17.2097	7.29323	8.01744	5.52868	GeneID:18766294	TMV resistance protein N	GO:0005524,GO:0005737,GO:0007165,GO:0009626,GO:0043531	ATP binding|cytoplasm|signal transduction|plant-type hypersensitive response|ADP binding
LOC18766324	587.681	299.664	875.697	2.92226	1.54708	0.00662062	0.0367307	Up	9.61182	13.3046	14.4793	53.6141	19.8173	34.5441	GeneID:18766324	Acetylserotonin O-methyltransferase	GO:0005737,GO:0008171,GO:0008757,GO:0017096,GO:0019438,GO:0030187,GO:0046983	cytoplasm|O-methyltransferase activity|S-adenosylmethionine-dependent methyltransferase activity|acetylserotonin O-methyltransferase activity|aromatic compound biosynthetic process|melatonin biosynthetic process|protein dimerization activity
LOC18766327	41.7223	18.9004	64.5442	3.41496	1.77187	0.000172193	0.00175267	Up	0.268245	0.169888	0.116568	0.594209	0.70833	0.545219	GeneID:18766327	TMV resistance protein N	GO:0005524,GO:0005737,GO:0007165,GO:0009626,GO:0043531	ATP binding|cytoplasm|signal transduction|plant-type hypersensitive response|ADP binding
LOC18766340	6.39205	0	12.7841	Inf	Inf	0.000222579	0.00217065	Up	0	0	0	0.768205	2.144	1.04229	GeneID:18766340	Heavy metal-associated isoprenylated plant protein 2	GO:0030001,GO:0046872	metal ion transport|metal ion binding
LOC18766358	129.953	175.4	84.5058	0.48179	-1.05352	0.00033666	0.00310019	Down	6.08707	7.54498	9.05253	4.09226	3.21531	3.42192	GeneID:18766358	Acid phosphatase 1	GO:0003993	acid phosphatase activity
LOC18766359	1129.61	62.3953	2196.83	35.2082	5.13784	1.84517e-19	2.17471e-17	Up	7.74695	0	11.4312	185.996	185.753	295.397	GeneID:18766359	Organ-specific protein S2
LOC18766373	41.9142	65.9426	17.8858	0.271233	-1.8824	6.22407e-05	0.000731782	Down	4.40309	4.10768	4.62405	1.36975	1.40491	0.715507	GeneID:18766373	Histidinol-phosphate aminotransferase 1, chloroplastic	GO:0000105,GO:0004400,GO:0009507,GO:0030170	histidine biosynthetic process|histidinol-phosphate transaminase activity|chloroplast|pyridoxal phosphate binding	ko00400,ko00350,ko00340,ko01230,ko00401,ko00960,ko00360	Phenylalanine, tyrosine and tryptophan biosynthesis|Tyrosine metabolism|Histidine metabolism|Biosynthesis of amino acids|Novobiocin biosynthesis|Tropane, piperidine and pyridine alkaloid biosynthesis|Phenylalanine metabolism
LOC18766385	447.076	232.501	661.651	2.8458	1.50884	7.39249e-05	0.000852562	Up	7.47966	1.55865	10.206	14.9975	20.2241	18.6287	GeneID:18766385	Cytochrome P450 94A2	GO:0004497,GO:0005506,GO:0005789,GO:0016021,GO:0016705,GO:0020037	monooxygenase activity|iron ion binding|endoplasmic reticulum membrane|integral component of membrane|oxidoreductase activity, acting on paired donors, with incorporation or reduction of molecular oxygen|heme binding	ko00073	Cutin, suberine and wax biosynthesis
LOC18766412	280.052	19.7183	540.385	27.4053	4.77638	3.34887e-29	7.44026e-27	Up	0.697684	0.711895	2.19809	38.9319	34.3194	24.3498	GeneID:18766412	Probable glutathione S-transferase	GO:0004364,GO:0009734	glutathione transferase activity|auxin-activated signaling pathway	ko00982,ko00480,ko00980	Drug metabolism - cytochrome P450|Glutathione metabolism|Metabolism of xenobiotics by cytochrome P450
LOC18766449	2362.99	3568.08	1157.89	0.324515	-1.62364	1.56442e-19	1.86658e-17	Down	72.2249	69.9925	75.9711	24.09	23.9424	21.2823	GeneID:18766449	Antisense-enhancing sequence 1	GO:0003824,GO:0005634,GO:0005829,GO:0009058,GO:0016853,GO:0031048	catalytic activity|nucleus|cytosol|biosynthetic process|isomerase activity|chromatin silencing by small RNA
LOC18766455	1146.7	1812.86	480.543	0.265075	-1.91553	6.59234e-24	1.14796e-21	Down	50.0028	53.2293	44.9099	12.3978	16.6587	9.21737	GeneID:18766455	Endo-1,4-beta-xylanase 5-like	GO:0031176,GO:0045493	endo-1,4-beta-xylanase activity|xylan catabolic process
LOC18766472	12.4694	21.848	3.09089	0.141472	-2.82141	0.00170949	0.0123563	Down	0.448847	0.305327	0.718282	0.11636	0.0681977	0.0221025	GeneID:18766472	Threonine--tRNA ligase, mitochondrial 1	GO:0004829,GO:0005524,GO:0005618,GO:0005737,GO:0005739,GO:0005829,GO:0005886,GO:0006435,GO:0009507,GO:0016020,GO:0046872	threonine-tRNA ligase activity|ATP binding|cell wall|cytoplasm|mitochondrion|cytosol|plasma membrane|threonyl-tRNA aminoacylation|chloroplast|membrane|metal ion binding	ko00970	Aminoacyl-tRNA biosynthesis
LOC18766478	883.324	1761.57	5.08184	0.00288484	-8.43729	2.03044e-09	6.82546e-08	Down	136.982	34.3531	141.428	0.491222	0.0599796	0.349903	GeneID:18766478	Pathogen-related protein	GO:0006952,GO:0009607	defense response|response to biotic stimulus
LOC18766505	24.2513	4.5921	43.9105	9.56218	3.25734	6.95114e-07	1.35716e-05	Up	0.0294416	0.0600825	0.123676	0.737296	0.407074	0.867697	GeneID:18766505	MDIS1-interacting receptor like kinase 2
LOC18766513	169.832	105.105	234.56	2.23167	1.15812	1.54799e-05	0.000219684	Up	2.62843	2.75933	3.02575	5.91636	6.61252	5.82814	GeneID:18766513	Cytochrome P450 CYP749A22	GO:0004497,GO:0005506,GO:0016021,GO:0016705,GO:0020037	monooxygenase activity|iron ion binding|integral component of membrane|oxidoreductase activity, acting on paired donors, with incorporation or reduction of molecular oxygen|heme binding	ko00905	Brassinosteroid biosynthesis
LOC18766514	13612.5	19185.6	8039.3	0.419027	-1.25488	0.00738361	0.0401456	Down	1225.55	1429.45	597.358	361.532	475.156	486.548	GeneID:18766514
LOC18766534	84.6772	138.424	30.9307	0.22345	-2.16198	1.29468e-09	4.51714e-08	Down	6.13807	5.01739	3.73945	1.25541	1.26238	0.736435	GeneID:18766534	Uncharacterized protein At4g06744	GO:0005576	extracellular region
LOC18766540	5578.18	2843.79	8312.58	2.92307	1.54748	8.15662e-08	2.01868e-06	Up	84.6965	94.2135	119.874	221.997	320.917	309.344	GeneID:18766540	U-box domain-containing protein 28	GO:0004842,GO:0010200	ubiquitin-protein transferase activity|response to chitin
LOC18766547	3.75798	0	7.51596	Inf	Inf	0.00780332	0.041816	Up	0	0	0	0.32117	0.235294	0.305031	GeneID:18766547	Acetylserotonin O-methyltransferase	GO:0005737,GO:0008171,GO:0008757,GO:0017096,GO:0019438,GO:0030187,GO:0046983	cytoplasm|O-methyltransferase activity|S-adenosylmethionine-dependent methyltransferase activity|acetylserotonin O-methyltransferase activity|aromatic compound biosynthetic process|melatonin biosynthetic process|protein dimerization activity
LOC18766551	16.8553	4.23513	29.4754	6.95975	2.79903	0.000234216	0.00226698	Up	0.166991	0.0681568	0.210445	0.981836	1.06564	1.00157	GeneID:18766551	Probably inactive leucine-rich repeat receptor-like protein kinase At5g48380
LOC18766560	242.79	158.89	326.691	2.05608	1.0399	0.00416458	0.0252818	Up	3.00407	3.17879	3.15483	6.09755	8.16516	4.468	GeneID:18766560	Long-chain-alcohol oxidase FAO2	GO:0016021,GO:0046577,GO:0050660	integral component of membrane|long-chain-alcohol oxidase activity|flavin adenine dinucleotide binding
LOC18766567	73.7193	36.6814	110.757	3.01944	1.59428	1.30607e-05	0.000188819	Up	1.44589	1.13005	1.00153	3.41657	3.14107	4.00839	GeneID:18766567
LOC18766571	33.418	49.8949	16.9411	0.339535	-1.55837	0.00756676	0.0408884	Down	1.73224	1.02068	1.10175	0.185951	0.20759	0.883037	GeneID:18766571	Protein NRT1/ PTR FAMILY 4.2	GO:0015333,GO:0016021,GO:0035673,GO:1904680	peptide:proton symporter activity|integral component of membrane|oligopeptide transmembrane transporter activity|peptide transmembrane transporter activity
LOC18766599	1892.26	1219.54	2564.98	2.10324	1.07262	3.84114e-08	1.019e-06	Up	31.3242	31.5731	35.2993	59.1321	77.1506	65.3367	GeneID:18766599	Aspartic proteinase-like protein 2	GO:0004190,GO:0005886,GO:0006508,GO:0030163,GO:0031225,GO:0046658	aspartic-type endopeptidase activity|plasma membrane|proteolysis|protein catabolic process|anchored component of membrane|anchored component of plasma membrane
LOC18766606	30.2276	6.06418	54.3911	8.96924	3.16499	2.60935e-07	5.64795e-06	Up	0	0.783062	0.151114	3.81237	2.24461	2.0832	GeneID:18766606	BURP domain-containing protein BNM2C	GO:0000326	protein storage vacuole
LOC18766614	1139.9	750.519	1529.28	2.03763	1.02689	3.76845e-08	1.00608e-06	Up	21.7051	24.9427	16.7605	38.577	39.4652	47.9711	GeneID:18766614	Eukaryotic translation initiation factor 4B3	GO:0003729,GO:0003743,GO:0005634,GO:0042803	mRNA binding|translation initiation factor activity|nucleus|protein homodimerization activity
LOC18766652	106.098	70.2453	141.95	2.02078	1.01492	0.00412282	0.0250755	Up	2.80459	1.6143	3.54951	6.73374	5.27744	3.86697	GeneID:18766652	Protein DOWNY MILDEW RESISTANCE 6	GO:0002229,GO:0002239,GO:0009617,GO:0009620,GO:0009751,GO:0009813,GO:0010150,GO:0033759,GO:0034785,GO:0042742,GO:0046244,GO:0046872,GO:0051213	defense response to oomycetes|response to oomycetes|response to bacterium|response to fungus|response to salicylic acid|flavonoid biosynthetic process|leaf senescence|flavone synthase activity|salicylate 5-hydroxylase activity|defense response to bacterium|salicylic acid catabolic process|metal ion binding|dioxygenase activity
LOC18766655	23.3648	42.6572	4.07247	0.0954697	-3.38881	8.11744e-07	1.55657e-05	Down	2.26087	3.77497	3.23773	0.223788	0.145734	0.495932	GeneID:18766655	Monothiol glutaredoxin-S1	GO:0005737,GO:0009055,GO:0015035,GO:0045454,GO:0046872,GO:0051537	cytoplasm|electron transfer activity|protein disulfide oxidoreductase activity|cell redox homeostasis|metal ion binding|2 iron, 2 sulfur cluster binding
LOC18766658	660.695	74.6836	1246.71	16.6932	4.06119	5.52205e-23	9.28136e-21	Up	3.81468	3.57848	7.10763	84.1414	93.5121	59.9985	GeneID:18766658	Probable glutathione S-transferase	GO:0004364,GO:0009734	glutathione transferase activity|auxin-activated signaling pathway	ko00982,ko00480,ko00980	Drug metabolism - cytochrome P450|Glutathione metabolism|Metabolism of xenobiotics by cytochrome P450
LOC18766692	577.594	304.88	850.308	2.78899	1.47974	0.00271379	0.0178966	Up	4.49769	5.14067	5.70814	20.4538	8.70521	13.0986	GeneID:18766692	Alpha-L-fucosidase 2	GO:0004560,GO:0010383,GO:0047513,GO:0048046	alpha-L-fucosidase activity|cell wall polysaccharide metabolic process|1,2-alpha-L-fucosidase activity|apoplast	ko00511	Other glycan degradation
LOC18766708	833.831	548.703	1118.96	2.03928	1.02806	0.00787213	0.0421147	Up	25.7166	26.381	27.7305	71.7013	32.5288	56.2262	GeneID:18766708	Cytochrome b561 and DOMON domain-containing protein At3g25290	GO:0005886,GO:0009506,GO:0016021,GO:0046872,GO:0055114	plasma membrane|plasmodesma|integral component of membrane|metal ion binding|oxidation-reduction process
LOC18766715	53.052	105.768	0.335533	0.00317234	-8.30024	0.00205099	0.0142963	Down	1.51819	5.63314	0.652246	0	0	0.0237873	GeneID:18766715	TMV resistance protein N	GO:0005524,GO:0005737,GO:0007165,GO:0009626,GO:0043531	ATP binding|cytoplasm|signal transduction|plant-type hypersensitive response|ADP binding
LOC18766754	99.9161	30.8303	169.002	5.48167	2.45462	6.25719e-13	3.57826e-11	Up	1.71489	0.572668	0.753124	5.32999	6.40029	4.57851	GeneID:18766754	UDP-glycosyltransferase 74E2	GO:0008194,GO:0010016,GO:0035251,GO:0042631,GO:0043231,GO:0052638,GO:0070301,GO:0071215,GO:0071475,GO:0080024,GO:0080043,GO:0080044,GO:0080167	UDP-glycosyltransferase activity|shoot system morphogenesis|UDP-glucosyltransferase activity|cellular response to water deprivation|intracellular membrane-bounded organelle|indole-3-butyrate beta-glucosyltransferase activity|cellular response to hydrogen peroxide|cellular response to abscisic acid stimulus|cellular hyperosmotic salinity response|indolebutyric acid metabolic process|quercetin 3-O-…
LOC18766759	61.7178	104.349	19.0861	0.182906	-2.45083	0.000780692	0.00638325	Down	4.17075	1.65641	2.41297	0.62543	0.318749	0.54235	GeneID:18766759	Probable flavin-containing monooxygenase 1	GO:0004497,GO:0004499,GO:0009626,GO:0009627,GO:0009870,GO:0010204,GO:0031543,GO:0042742,GO:0050660,GO:0050661,GO:0050832,GO:0051707,GO:0062034,GO:0062047,GO:0071456	monooxygenase activity|N,N-dimethylaniline monooxygenase activity|plant-type hypersensitive response|systemic acquired resistance|defense response signaling pathway, resistance gene-dependent|defense response signaling pathway, resistance gene-independent|peptidyl-proline dioxygenase activity|defense response to bacterium|flavin adenine dinucleotide binding|NADP binding|defense response to fungus…	ko00982	Drug metabolism - cytochrome P450
LOC18766783	475.721	149.763	801.679	5.35298	2.42034	4.84852e-11	2.11551e-09	Up	3.95088	4.8489	4.32324	20.1551	19.2472	29.2278	GeneID:18766783	Probable flavin-containing monooxygenase 1	GO:0004497,GO:0004499,GO:0009626,GO:0009627,GO:0009870,GO:0010204,GO:0031543,GO:0042742,GO:0050660,GO:0050661,GO:0050832,GO:0051707,GO:0062034,GO:0062047,GO:0071456	monooxygenase activity|N,N-dimethylaniline monooxygenase activity|plant-type hypersensitive response|systemic acquired resistance|defense response signaling pathway, resistance gene-dependent|defense response signaling pathway, resistance gene-independent|peptidyl-proline dioxygenase activity|defense response to bacterium|flavin adenine dinucleotide binding|NADP binding|defense response to fungus…	ko00982	Drug metabolism - cytochrome P450
LOC18766794	5380.39	2406.95	8353.83	3.4707	1.79523	1.11982e-05	0.000164226	Up	75.5611	100.929	79.8463	203.159	359.216	301.586	GeneID:18766794	Zinc finger protein ZAT6	GO:0000978,GO:0003700,GO:0005634,GO:0010200,GO:0044212,GO:0046872,GO:0055062,GO:2000280	RNA polymerase II proximal promoter sequence-specific DNA binding|DNA-binding transcription factor activity|nucleus|response to chitin|transcription regulatory region DNA binding|metal ion binding|phosphate ion homeostasis|regulation of root development
LOC18766797	46.0578	67.3102	24.8054	0.368523	-1.44017	0.00111431	0.00859817	Down	4.18785	4.3379	4.99774	1.45084	2.22705	1.18109	GeneID:18766797	Photosystem II reaction center W protein, chloroplastic	GO:0009523,GO:0009535,GO:0015979,GO:0016021,GO:0042549	photosystem II|chloroplast thylakoid membrane|photosynthesis|integral component of membrane|photosystem II stabilization	ko00195	Photosynthesis
LOC18766816	9001.14	13683.4	4318.89	0.31563	-1.66369	7.69473e-22	1.15296e-19	Down	684.613	644.569	668.824	169.016	194.412	252.413	GeneID:18766816	Expansin-like A2
LOC18766820	984.628	539.278	1429.98	2.65165	1.40689	3.79653e-05	0.000477444	Up	12.9717	24.451	19.0994	36.0819	51.6749	57.9907	GeneID:18766820	Alcohol dehydrogenase	GO:0004022,GO:0005737,GO:0008270	alcohol dehydrogenase (NAD) activity|cytoplasm|zinc ion binding	ko00350,ko00592,ko00071,ko00010	Tyrosine metabolism|alpha-Linolenic acid metabolism|Fatty acid degradation|Glycolysis / Gluconeogenesis
LOC18766864	37.1217	59.109	15.1344	0.256042	-1.96555	8.53276e-05	0.000957224	Down	1.57326	2.64876	3.13921	0.685195	0.752978	0.406727	GeneID:18766864	Non-functional pseudokinase ZED1	GO:0004674,GO:0005524,GO:0005886,GO:0007166,GO:0050829	protein serine/threonine kinase activity|ATP binding|plasma membrane|cell surface receptor signaling pathway|defense response to Gram-negative bacterium
LOC18766868	376.974	536.86	217.088	0.404366	-1.30626	3.0055e-09	9.89665e-08	Down	16.9474	14.8264	17.1331	7.04894	6.21231	6.12939	GeneID:18766868
LOC18766888	1399.47	2164.48	634.461	0.293125	-1.77041	2.17923e-21	3.19109e-19	Down	135.003	166.995	139.281	38.6197	43.4653	44.1212	GeneID:18766888	Protein PHLOEM PROTEIN 2-LIKE A1	GO:0009625,GO:0030246,GO:0043394	response to insect|carbohydrate binding|proteoglycan binding
LOC18766898	30.0469	5.77132	54.3225	9.41249	3.23458	6.65091e-08	1.66955e-06	Up	0.145685	0.371631	0.152996	1.46727	2.6341	1.99615	GeneID:18766898	TMV resistance protein N	GO:0005524,GO:0005737,GO:0007165,GO:0009626,GO:0043531	ATP binding|cytoplasm|signal transduction|plant-type hypersensitive response|ADP binding
LOC18766909	706.438	1026.05	386.826	0.377005	-1.40735	1.02901e-12	5.6828e-11	Down	57.201	65.7884	56.3677	19.3204	26.5505	20.0021	GeneID:18766909	Protein PHLOEM PROTEIN 2-LIKE A1	GO:0009625,GO:0030246,GO:0043394	response to insect|carbohydrate binding|proteoglycan binding
LOC18766911	269.984	110.945	429.022	3.86697	1.9512	8.92676e-16	7.18939e-14	Up	0.924393	1.99272	1.6681	5.84048	6.18977	5.27772	GeneID:18766911	TMV resistance protein N	GO:0005524,GO:0005737,GO:0007165,GO:0009626,GO:0043531	ATP binding|cytoplasm|signal transduction|plant-type hypersensitive response|ADP binding
LOC18766920	295.894	182.682	409.105	2.23943	1.16313	0.00250683	0.0168245	Up	1.70778	2.53253	2.35544	3.27264	5.98187	5.0979	GeneID:18766920	TMV resistance protein N	GO:0005524,GO:0005737,GO:0007165,GO:0009626,GO:0043531	ATP binding|cytoplasm|signal transduction|plant-type hypersensitive response|ADP binding
LOC18766935	65.187	97.2841	33.0899	0.340137	-1.55581	0.00242181	0.0163733	Down	1.08853	1.41615	1.68616	1.00743	0.231547	0.182918	GeneID:18766935	MDIS1-interacting receptor like kinase 2
LOC18766943	250.873	57.5499	444.196	7.71846	2.94831	0.00273397	0.0179806	Up	1.26967	2.1994	1.92256	10.2236	22.2658	7.84728	GeneID:18766943	Tryptophan aminotransferase-related protein 4	GO:0008483,GO:0016021,GO:0016846	transaminase activity|integral component of membrane|carbon-sulfur lyase activity
LOC18766963	6.50369	1.01113	11.9963	11.8642	3.56855	0.00725489	0.0395794	Up	0	0	0.118492	0.491404	0.480014	0.427818	GeneID:18766963
LOC18766970	302.817	518.068	87.5661	0.169024	-2.5647	6.64336e-05	0.00077542	Down	20.5816	8.93198	13.1602	2.41114	2.1613	2.50551	GeneID:18766970	Serine carboxypeptidase-like 18	GO:0004185,GO:0005576,GO:0019748	serine-type carboxypeptidase activity|extracellular region|secondary metabolic process
LOC18767014	8.44931	1.93778	14.9608	7.72061	2.94871	0.00734434	0.0400109	Up	0.0206427	0.0631894	0.0433572	0.247236	0.197596	0.512317	GeneID:18767014
LOC18767022	83.5569	32.4259	134.688	4.15372	2.0544	6.91959e-09	2.12976e-07	Up	0.448345	0.276894	0.483235	1.78565	1.66897	1.47631	GeneID:18767022	Putative disease resistance protein RGA4	GO:0005524,GO:0006952,GO:0043531	ATP binding|defense response|ADP binding
LOC18767028	11.7496	2.23194	21.2673	9.52864	3.25227	0.000653372	0.00549088	Up	0	0.0940849	0.016139	0.301188	0.375931	0.333728	GeneID:18767028	Disease resistance protein RPM1
LOC18767054	244.906	101.151	388.661	3.84237	1.942	5.3452e-15	3.86957e-13	Up	4.00966	3.08583	3.78265	12.3943	13.0467	15.4611	GeneID:18767054	Nitronate monooxygenase	GO:0003700,GO:0009410,GO:0018580	DNA-binding transcription factor activity|response to xenobiotic stimulus|nitronate monooxygenase activity
LOC18767063	1688.4	2256.77	1120.02	0.496292	-1.01074	1.20889e-06	2.22752e-05	Down	193.583	251.629	171.841	107.122	101.618	90.3456	GeneID:18767063
LOC18767074	493.635	279.286	707.985	2.53498	1.34197	6.73947e-05	0.00078427	Up	7.6245	12.2431	7.1139	24.3096	26.2339	16.1145	GeneID:18767074	Putative UDP-glucose glucosyltransferase	GO:0016758	transferase activity, transferring hexosyl groups
LOC18767076	313.347	439.968	186.726	0.424409	-1.23647	5.45084e-08	1.39549e-06	Down	13.1334	14.5713	12.3169	4.52723	6.46571	5.54518	GeneID:18767076	F-box protein At2g27310
LOC18767135	210.302	65.7927	354.81	5.39286	2.43105	3.95496e-20	5.06262e-18	Up	1.02065	1.0225	1.81243	6.38489	6.86849	7.13869	GeneID:18767135	Glucose-1-phosphate adenylyltransferase large subunit 1 (Fragment)	GO:0005524,GO:0005978,GO:0008878,GO:0009501,GO:0009507,GO:0019252	ATP binding|glycogen biosynthetic process|glucose-1-phosphate adenylyltransferase activity|amyloplast|chloroplast|starch biosynthetic process	ko00520,ko00500	Amino sugar and nucleotide sugar metabolism|Starch and sucrose metabolism
LOC18767140	409.882	258.342	561.423	2.17318	1.11981	0.00579395	0.0330358	Up	8.03875	4.15157	7.92424	9.47761	15.9981	17.2122	GeneID:18767140
LOC18767155	247.422	59.2468	435.598	7.35226	2.87819	2.40203e-07	5.24029e-06	Up	1.40051	0.93908	1.40776	6.38275	12.0228	8.44131	GeneID:18767155	Uncharacterized aarF domain-containing protein kinase At1g71810, chloroplastic	GO:0004672,GO:0005524,GO:0009507,GO:0010287	protein kinase activity|ATP binding|chloroplast|plastoglobule
LOC18767157	14.3466	28.3406	0.352612	0.0124419	-6.32865	8.31894e-08	2.0536e-06	Down	0.918211	0.468457	0.573983	0	0.0232521	0	GeneID:18767157	Protein FAR-RED IMPAIRED RESPONSE 1	GO:0003700,GO:0005634,GO:0008270,GO:0009639,GO:0010017,GO:0010018,GO:0010218,GO:0042753,GO:0045893	DNA-binding transcription factor activity|nucleus|zinc ion binding|response to red or far red light|red or far-red light signaling pathway|far-red light signaling pathway|response to far red light|positive regulation of circadian rhythm|positive regulation of transcription, DNA-templated
LOC18767165	46.9552	19.6564	74.2541	3.77761	1.91747	4.51899e-05	0.000555647	Up	0.806482	0.785504	0.692963	1.91587	3.62597	2.84312	GeneID:18767165	TMV resistance protein N	GO:0005524,GO:0005737,GO:0007165,GO:0009626,GO:0043531	ATP binding|cytoplasm|signal transduction|plant-type hypersensitive response|ADP binding
LOC18767197	448.289	763.62	132.958	0.174115	-2.52189	1.67242e-29	3.89473e-27	Down	19.9707	18.2097	15.9704	2.99503	2.71154	3.51519	GeneID:18767197	Purple acid phosphatase 2	GO:0003993,GO:0005576,GO:0046872	acid phosphatase activity|extracellular region|metal ion binding
LOC18767221	268.01	159.608	376.413	2.35836	1.23779	1.85501e-07	4.22327e-06	Up	6.60439	6.89747	6.16064	14.4242	16.0732	14.7841	GeneID:18767221	LOB domain-containing protein 38
LOC18767234	40.8853	79.001	2.76966	0.0350586	-4.83409	4.43873e-07	9.12726e-06	Down	3.10502	3.16827	6.41477	0	0.270691	0.157913	GeneID:18767234	Xyloglucan endotransglucosylase/hydrolase protein 2	GO:0004553,GO:0005618,GO:0010411,GO:0016762,GO:0042546,GO:0048046,GO:0071555	hydrolase activity, hydrolyzing O-glycosyl compounds|cell wall|xyloglucan metabolic process|xyloglucan:xyloglucosyl transferase activity|cell wall biogenesis|apoplast|cell wall organization
LOC18767253	105.716	154.311	57.1215	0.370171	-1.43373	5.94032e-06	9.43472e-05	Down	7.85796	10.2155	10.3918	3.35896	4.39545	2.52806	GeneID:18767253	Pathogenesis-related protein 1	GO:0005615,GO:0005618,GO:0006952,GO:0009414,GO:0009627,GO:0010266,GO:0048046	extracellular space|cell wall|defense response|response to water deprivation|systemic acquired resistance|response to vitamin B1|apoplast	ko04075	Plant hormone signal transduction
LOC18767260	95.2006	61.6204	128.781	2.08991	1.06344	0.00109662	0.0084956	Up	2.13617	2.57929	2.24337	4.57424	4.77115	4.85982	GeneID:18767260	Chloroplast envelope quinone oxidoreductase homolog	GO:0005773,GO:0005886,GO:0009507,GO:0009535,GO:0009706,GO:0009941,GO:0016491	vacuole|plasma membrane|chloroplast|chloroplast thylakoid membrane|chloroplast inner membrane|chloroplast envelope|oxidoreductase activity
LOC18767270	47.2878	80.6949	13.8808	0.172015	-2.53939	5.25615e-08	1.34922e-06	Down	2.85016	2.08569	2.41874	0.43885	0.12248	0.684738	GeneID:18767270	Abscisate beta-glucosyltransferase	GO:0016758	transferase activity, transferring hexosyl groups
LOC18767281	12.7636	3.51773	22.0095	6.25674	2.64541	0.00249833	0.0167849	Up	0.220748	0.450488	0.15455	1.8427	2.03478	1.14137	GeneID:18767281	Pathogenesis-related protein 1	GO:0005615,GO:0009611,GO:0009617,GO:0009723,GO:0009751,GO:0009753,GO:0009814,GO:0080027	extracellular space|response to wounding|response to bacterium|response to ethylene|response to salicylic acid|response to jasmonic acid|defense response, incompatible interaction|response to herbivore	ko04075	Plant hormone signal transduction
LOC18767284	258.03	344.485	171.574	0.498059	-1.00561	2.37413e-05	0.000316917	Down	12.7128	15.0752	13.912	7.02483	6.659	6.63235	GeneID:18767284	Glutathione S-transferase F13	GO:0004364,GO:0005737,GO:0005829,GO:0006749,GO:0009407	glutathione transferase activity|cytoplasm|cytosol|glutathione metabolic process|toxin catabolic process	ko00982,ko00480,ko00980	Drug metabolism - cytochrome P450|Glutathione metabolism|Metabolism of xenobiotics by cytochrome P450
LOC18767362	667.729	1115.71	219.751	0.196961	-2.34402	2.09151e-29	4.75609e-27	Down	43.8392	54.6871	52.1688	10.6691	5.5281	12.9526	GeneID:18767362	LIM domain-containing protein WLIM1	GO:0003729,GO:0005737,GO:0005856,GO:0005886,GO:0046872,GO:0051015,GO:0051017	mRNA binding|cytoplasm|cytoskeleton|plasma membrane|metal ion binding|actin filament binding|actin filament bundle assembly
LOC18767386	401.275	771.471	31.0785	0.0402847	-4.63362	1.92968e-69	2.07215e-66	Down	57.0125	47.3727	46.9367	0.741406	3.22608	1.92041	GeneID:18767386	Germin-like protein subfamily 1 member 7	GO:0005618,GO:0030145,GO:0045735,GO:0048046	cell wall|manganese ion binding|nutrient reservoir activity|apoplast
LOC18767388	94.893	127.201	62.5853	0.49202	-1.02321	0.00783634	0.0419813	Down	3.31131	3.7724	5.84082	1.99522	1.91478	2.32714	GeneID:18767388	Probable cinnamyl alcohol dehydrogenase 1	GO:0008270,GO:0009809,GO:0045551,GO:0052747	zinc ion binding|lignin biosynthetic process|cinnamyl-alcohol dehydrogenase activity|sinapyl alcohol dehydrogenase activity	ko00940	Phenylpropanoid biosynthesis
LOC18767393	19.9921	2.31771	37.6664	16.2516	4.02251	1.92215e-07	4.33022e-06	Up	0.0533387	0	0.140038	1.04536	1.02114	1.04799	GeneID:18767393	Cytochrome P450 82G1	GO:0005506,GO:0006952,GO:0016020,GO:0016021,GO:0016114,GO:0016709,GO:0020037,GO:0042343,GO:0046246,GO:0097007,GO:0097008	iron ion binding|defense response|membrane|integral component of membrane|terpenoid biosynthetic process|oxidoreductase activity, acting on paired donors, with incorporation or reduction of molecular oxygen, NAD(P)H as one donor, and incorporation of one atom of oxygen|heme binding|indole glucosinolate metabolic process|terpene biosynthetic process|4,8,12-trimethyltrideca-1,3,7,11-tetraene syntha…	ko00904	Diterpenoid biosynthesis
LOC18767398	114.808	154.416	75.2	0.486997	-1.03802	0.00490547	0.02882	Down	9.20564	7.42288	5.37614	4.6938	1.86266	3.99356	GeneID:18767398	Auxin-induced protein 22D	GO:0005634,GO:0006355,GO:0009734	nucleus|regulation of transcription, DNA-templated|auxin-activated signaling pathway	ko04075	Plant hormone signal transduction
LOC18767416	228.483	408.012	48.9544	0.119983	-3.0591	9.38052e-30	2.21117e-27	Down	23.7112	19.6313	23.809	2.83082	3.59477	1.45183	GeneID:18767416	Monothiol glutaredoxin-S9	GO:0005634,GO:0005737,GO:0006995,GO:0009055,GO:0015035,GO:0045454,GO:0046872,GO:0051537	nucleus|cytoplasm|cellular response to nitrogen starvation|electron transfer activity|protein disulfide oxidoreductase activity|cell redox homeostasis|metal ion binding|2 iron, 2 sulfur cluster binding
LOC18767422	72.4815	102.977	41.9854	0.407715	-1.29437	0.000385576	0.00349241	Down	2.31575	2.5317	1.91083	1.14815	0.659726	0.898018	GeneID:18767422
LOC18767425	1709	683.846	2734.15	3.9982	1.99935	3.89063e-08	1.02875e-06	Up	32.7858	21.751	33.0692	91.4281	105.99	145.338	GeneID:18767425	Mitochondrial uncoupling protein 4	GO:0005310,GO:0005743,GO:0006839,GO:0008272,GO:0015116,GO:0015117,GO:0015131,GO:0015140,GO:0015141,GO:0015297,GO:0015709,GO:0015729,GO:0016021,GO:0035435,GO:0071422,GO:0071423	dicarboxylic acid transmembrane transporter activity|mitochondrial inner membrane|mitochondrial transport|sulfate transport|sulfate transmembrane transporter activity|thiosulfate transmembrane transporter activity|oxaloacetate transmembrane transporter activity|malate transmembrane transporter activity|succinate transmembrane transporter activity|antiporter activity|thiosulfate transport|oxaloace…
LOC18767434	227.615	414.698	40.5321	0.0977387	-3.35493	9.79932e-34	2.95955e-31	Down	39.6199	37.3613	46.2422	6.74679	1.9971	3.20388	GeneID:18767434	Glutaredoxin-C11	GO:0000122,GO:0005737,GO:0009055,GO:0015035,GO:0045454	negative regulation of transcription by RNA polymerase II|cytoplasm|electron transfer activity|protein disulfide oxidoreductase activity|cell redox homeostasis
LOC18767441	82.4407	126.568	38.3135	0.302711	-1.72399	0.00125774	0.00950758	Down	7.72079	4.91809	5.24927	0.680294	3.74983	0.784561	GeneID:18767441	Peroxidase 10	GO:0004601,GO:0005576,GO:0006979,GO:0020037,GO:0042744,GO:0046872	peroxidase activity|extracellular region|response to oxidative stress|heme binding|hydrogen peroxide catabolic process|metal ion binding	ko00940	Phenylpropanoid biosynthesis
LOC18767469	76.496	104.33	48.6624	0.46643	-1.10027	0.0019281	0.0136464	Down	2.00217	1.79424	1.95637	0.777212	0.925852	0.918195	GeneID:18767469	Chloride channel protein CLC-e	GO:0005247,GO:0009535,GO:0034707,GO:0034765	voltage-gated chloride channel activity|chloroplast thylakoid membrane|chloride channel complex|regulation of ion transmembrane transport
LOC18767473	67.3521	92.5599	42.1443	0.455319	-1.13505	0.00224588	0.0153666	Down	2.52604	1.75189	1.51293	1.03139	0.839574	0.714266	GeneID:18767473	Probable polygalacturonase	GO:0004650,GO:0005975,GO:0016021	polygalacturonase activity|carbohydrate metabolic process|integral component of membrane
LOC18767477	36.4395	19.1304	53.7486	2.80959	1.49036	0.00233243	0.0158865	Up	0.191728	0.139738	0.220526	0.626268	0.466097	0.434297	GeneID:18767477	Transcription factor GTE10	GO:0005634,GO:0009409,GO:0009651,GO:0009737,GO:0009738,GO:0045892,GO:0051365	nucleus|response to cold|response to salt stress|response to abscisic acid|abscisic acid-activated signaling pathway|negative regulation of transcription, DNA-templated|cellular response to potassium ion starvation
LOC18767481	1027.52	538.098	1516.94	2.81908	1.49522	0.000105107	0.00114586	Up	7.67839	10.2113	7.77967	19.3547	30.7644	20.2157	GeneID:18767481	UDP-glycosyltransferase 74G1	GO:0035251	UDP-glucosyltransferase activity
LOC18767484	1229.03	770.025	1688.03	2.19218	1.13237	3.47822e-09	1.12803e-07	Up	14.8777	14.9987	13.676	27.8142	35.7643	29.5341	GeneID:18767484	Probable LRR receptor-like serine/threonine-protein kinase RKF3
LOC18767486	3983.55	1593.04	6374.06	4.0012	2.00043	2.19722e-17	2.06166e-15	Up	43.3738	33.4565	38.9674	161.253	120.664	172.81	GeneID:18767486	Ferredoxin--nitrite reductase, chloroplastic	GO:0009507,GO:0020037,GO:0042128,GO:0046872,GO:0048307,GO:0051539	chloroplast|heme binding|nitrate assimilation|metal ion binding|ferredoxin-nitrite reductase activity|4 iron, 4 sulfur cluster binding	ko00910	Nitrogen metabolism
LOC18767512	2438.3	1508.58	3368.01	2.23256	1.1587	0.000231876	0.00224658	Up	122.052	132.106	193.645	244.52	369.763	361.747	GeneID:18767512
LOC18767528	28.5631	50.3182	6.80797	0.135299	-2.88578	0.000349806	0.0032113	Down	3.39989	1.2244	3.30797	0.163317	0.265886	0.62044	GeneID:18767528	Translocator protein homolog	GO:0000139,GO:0005783,GO:0005789,GO:0005794,GO:0005795,GO:0006778,GO:0006970,GO:0009651,GO:0009737,GO:0016020,GO:0016021,GO:0020037,GO:0031969	Golgi membrane|endoplasmic reticulum|endoplasmic reticulum membrane|Golgi apparatus|Golgi stack|porphyrin-containing compound metabolic process|response to osmotic stress|response to salt stress|response to abscisic acid|membrane|integral component of membrane|heme binding|chloroplast membrane
LOC18767537	1087.15	477.717	1696.59	3.55144	1.82841	7.40625e-06	0.00011425	Up	8.87309	28.6882	15.3845	66.6049	42.597	74.4127	GeneID:18767537	Stearoyl-[acyl-carrier-protein] 9-desaturase 6, chloroplastic	GO:0006631,GO:0006633,GO:0009570,GO:0016020,GO:0045300,GO:0046872,GO:0102786	fatty acid metabolic process|fatty acid biosynthetic process|chloroplast stroma|membrane|acyl-[acyl-carrier-protein] desaturase activity|metal ion binding|stearoyl-[acp] desaturase activity	ko00061,ko01040,ko01212	Fatty acid biosynthesis|Biosynthesis of unsaturated fatty acids|Fatty acid metabolism
LOC18767545	366.464	230.866	502.061	2.17468	1.12081	4.09628e-07	8.50451e-06	Up	3.46239	3.22681	2.46785	6.60071	6.93962	5.9071	GeneID:18767545	Disease resistance-like protein DSC1	GO:0005524,GO:0007165,GO:0009626,GO:0042742,GO:0043531	ATP binding|signal transduction|plant-type hypersensitive response|defense response to bacterium|ADP binding
LOC18767577	7.73275	14.7905	0.675036	0.04564	-4.45356	0.000914872	0.00730424	Down	0.397388	0.320118	0.263577	0.0227727	0	0.0216284	GeneID:18767577	Protein ACCELERATED CELL DEATH 6	GO:0005887,GO:0008219,GO:0009416,GO:0009615,GO:0009617,GO:0009751,GO:0009816,GO:0016020,GO:0016567,GO:0030176,GO:0050826,GO:0071446,GO:1900150,GO:1900426,GO:1902290,GO:2000031	integral component of plasma membrane|cell death|response to light stimulus|response to virus|response to bacterium|response to salicylic acid|defense response to bacterium, incompatible interaction|membrane|protein ubiquitination|integral component of endoplasmic reticulum membrane|response to freezing|cellular response to salicylic acid stimulus|regulation of defense response to fungus|positive…
LOC18767578	174.99	249.92	100.06	0.400368	-1.3206	7.9261e-07	1.52898e-05	Down	8.87728	9.98802	7.90486	3.85893	2.80019	3.83954	GeneID:18767578	Probable xyloglucan endotransglucosylase/hydrolase protein 10	GO:0004553,GO:0005618,GO:0010411,GO:0016762,GO:0042546,GO:0048046,GO:0071555	hydrolase activity, hydrolyzing O-glycosyl compounds|cell wall|xyloglucan metabolic process|xyloglucan:xyloglucosyl transferase activity|cell wall biogenesis|apoplast|cell wall organization
LOC18767587	502.592	242.92	762.264	3.13792	1.64981	0.000399309	0.00359993	Up	10.688	6.82793	18.0566	26.1585	34.6462	48.6309	GeneID:18767587
LOC18767596	154.03	85.787	222.272	2.59098	1.3735	9.68018e-07	1.81835e-05	Up	5.07507	5.49876	3.68138	12.3618	14.0786	9.57648	GeneID:18767596	Nuclear transcription factor Y subunit B-5	GO:0003700,GO:0005634,GO:0043565,GO:0045893,GO:0046982	DNA-binding transcription factor activity|nucleus|sequence-specific DNA binding|positive regulation of transcription, DNA-templated|protein heterodimerization activity
LOC18767602	88.1122	137.605	38.619	0.28065	-1.83315	1.1164e-07	2.67729e-06	Down	18.6181	24.8426	19.1012	4.83399	5.17891	7.10877	GeneID:18767602	Chaperone protein dnaJ 11, chloroplastic	GO:0005634,GO:0009507,GO:0009536,GO:0009570	nucleus|chloroplast|plastid|chloroplast stroma
LOC18767617	200.254	131.693	268.816	2.04123	1.02944	5.12082e-05	0.000618627	Up	5.02002	5.08317	5.8756	10.431	11.3712	10.105	GeneID:18767617	Protein SYM1	GO:0005743,GO:0016021	mitochondrial inner membrane|integral component of membrane	ko04146	Peroxisome
LOC18767640	919.298	478.724	1359.87	2.84062	1.5062	8.25917e-05	0.000934122	Up	18.0119	4.78072	10.6067	32.365	23.529	37.4806	GeneID:18767640	Lysine histidine transporter-like 8	GO:0003333,GO:0005886,GO:0015171,GO:0016021	amino acid transmembrane transport|plasma membrane|amino acid transmembrane transporter activity|integral component of membrane
LOC18767673	485.092	292.166	678.018	2.32066	1.21454	5.53003e-09	1.72682e-07	Up	5.42966	7.5409	6.99191	13.4894	14.3684	17.3792	GeneID:18767673	Protein NUCLEAR FUSION DEFECTIVE 4	GO:0000741,GO:0005739,GO:0009651,GO:0010197,GO:0016021	karyogamy|mitochondrion|response to salt stress|polar nucleus fusion|integral component of membrane
LOC18767707	532.084	899.093	165.075	0.183602	-2.44535	9.16728e-30	2.18758e-27	Down	18.8701	20.2903	17.6012	3.35931	3.3873	3.43751	GeneID:18767707	(+)-pulegone reductase	GO:0005737,GO:0016114,GO:0042214,GO:0052579,GO:0052580,GO:0070402	cytoplasm|terpenoid biosynthetic process|terpene metabolic process|(+)-pulegone reductase, (+)-isomenthone as substrate, activity|(+)-pulegone reductase, (-)-menthone as substrate, activity|NADPH binding
LOC18767714	14.1374	0	28.2747	Inf	Inf	5.58339e-06	8.91911e-05	Up	0	0	0	0.745045	2.77878	1.86551	GeneID:18767714	17.6 kDa class I heat shock protein	GO:0005737	cytoplasm	ko04141	Protein processing in endoplasmic reticulum
LOC18767747	81.6912	23.3439	140.038	5.99893	2.58471	2.28118e-12	1.18933e-10	Up	0.446132	0.345966	0.524742	2.6425	2.14472	2.97106	GeneID:18767747	Ent-copalyl diphosphate synthase, chloroplastic	GO:0000287,GO:0009507,GO:0009686,GO:0009905,GO:0010333	magnesium ion binding|chloroplast|gibberellin biosynthetic process|ent-copalyl diphosphate synthase activity|terpene synthase activity	ko00904	Diterpenoid biosynthesis
LOC18767771	14.9379	0	29.8758	Inf	Inf	0.00091887	0.00732406	Up	0	0	0	1.11236	3.80304	0.924408	GeneID:18767771	Pathogenesis-related protein 1	GO:0005615,GO:0009611,GO:0009617,GO:0009723,GO:0009751,GO:0009753,GO:0009814,GO:0080027	extracellular space|response to wounding|response to bacterium|response to ethylene|response to salicylic acid|response to jasmonic acid|defense response, incompatible interaction|response to herbivore	ko04075	Plant hormone signal transduction
LOC18767772	91.6399	48.9319	134.348	2.74561	1.45713	0.0010282	0.00803323	Up	0.655691	0.13724	0.503205	1.53768	1.12653	0.851908	GeneID:18767772	TMV resistance protein N	GO:0005524,GO:0005737,GO:0007165,GO:0009626,GO:0043531	ATP binding|cytoplasm|signal transduction|plant-type hypersensitive response|ADP binding
LOC18767774	99.2493	196.464	2.03425	0.0103543	-6.59363	5.60145e-12	2.79048e-10	Down	5.83708	3.96042	8.84744	0.0327603	0.032001	0.124456	GeneID:18767774	Disease resistance protein RPS4B
LOC18767817	56.6344	5.52092	107.748	19.5163	4.28661	2.40793e-18	2.57143e-16	Up	0.307963	0.0785589	0.28299	4.02377	4.01239	4.81677	GeneID:18767817	Nitronate monooxygenase	GO:0003700,GO:0009410,GO:0018580	DNA-binding transcription factor activity|response to xenobiotic stimulus|nitronate monooxygenase activity
LOC18767831	6.10035	0	12.2007	Inf	Inf	0.00350477	0.0220376	Up	0	0	0	1.77288	0.157435	0.918432	GeneID:18767831	Organ-specific protein S2
LOC18767849	88.4968	126.704	50.2892	0.396902	-1.33314	0.00857682	0.0450785	Down	1.41704	2.63743	1.24012	0.771443	0.614014	0.664837	GeneID:18767849	TMV resistance protein N	GO:0005524,GO:0005737,GO:0007165,GO:0009626,GO:0043531	ATP binding|cytoplasm|signal transduction|plant-type hypersensitive response|ADP binding
LOC18767850	3299.64	503.54	6095.74	12.1058	3.59762	7.03479e-06	0.000109393	Up	12.7712	15.1856	13.1687	140.456	239.977	103.55	GeneID:18767850	BURP domain-containing protein 17
LOC18767865	420.087	148.94	691.233	4.64103	2.21445	7.44982e-23	1.22032e-20	Up	7.1677	8.97861	11.3217	43.336	46.2982	35.1925	GeneID:18767865	Cell number regulator 1	GO:0008285,GO:0016021	negative regulation of cell proliferation|integral component of membrane
LOC18767875	58.5523	95.5673	21.5373	0.225363	-2.14968	0.00216551	0.0149168	Down	3.62131	7.83955	3.4433	1.22551	0.936862	1.11332	GeneID:18767875	Cysteine-rich repeat secretory protein 55	GO:0005576,GO:0080167	extracellular region|response to karrikin
LOC18767897	487.968	324.117	651.819	2.01106	1.00796	0.000240883	0.00232221	Up	6.08572	9.19228	9.33507	20.296	12.2317	16.1295	GeneID:18767897	Probable inactive patatin-like protein 9	GO:0016042,GO:0016787	lipid catabolic process|hydrolase activity
LOC18767905	1349.1	31.604	2666.61	84.3755	6.39875	2.50296e-69	2.5463e-66	Up	0.382036	0.206374	0.53101	26.0468	31.5021	35.1257	GeneID:18767905	TMV resistance protein N	GO:0005524,GO:0005737,GO:0007165,GO:0009626,GO:0043531	ATP binding|cytoplasm|signal transduction|plant-type hypersensitive response|ADP binding
LOC18767921	112.496	172.437	52.5543	0.304774	-1.71419	4.68088e-08	1.22266e-06	Down	5.9996	6.1576	7.00076	1.52806	2.31359	1.85037	GeneID:18767921
LOC18767948	264.837	147.112	382.562	2.60047	1.37877	5.52758e-09	1.72682e-07	Up	3.70912	1.622	4.49624	9.0694	7.75461	8.35064	GeneID:18767948	Branched-chain-amino-acid aminotransferase 2, chloroplastic	GO:0004084,GO:0009097,GO:0009098,GO:0009099,GO:0009507,GO:0052654,GO:0052655,GO:0052656,GO:0071669	branched-chain-amino-acid transaminase activity|isoleucine biosynthetic process|leucine biosynthetic process|valine biosynthetic process|chloroplast|L-leucine transaminase activity|L-valine transaminase activity|L-isoleucine transaminase activity|plant-type cell wall organization or biogenesis	ko00290,ko00770,ko00280,ko01210,ko01230,ko00270	Valine, leucine and isoleucine biosynthesis|Pantothenate and CoA biosynthesis|Valine, leucine and isoleucine degradation|2-Oxocarboxylic acid metabolism|Biosynthesis of amino acids|Cysteine and methionine metabolism
LOC18767958	31.3367	14.0951	48.5783	3.44646	1.78511	0.00858845	0.0450785	Up	0.117316	0.0552485	0.227452	0.560067	0.585479	0.214636	GeneID:18767958	TMV resistance protein N	GO:0005524,GO:0005737,GO:0007165,GO:0009626,GO:0043531	ATP binding|cytoplasm|signal transduction|plant-type hypersensitive response|ADP binding
LOC18767980	8.92211	17.1732	0.671067	0.0390765	-4.67756	0.000245479	0.00236063	Down	1.15006	0.440056	1.00648	0	0	0.0991061	GeneID:18767980	Xyloglucan endotransglucosylase/hydrolase protein 2	GO:0004553,GO:0005618,GO:0010411,GO:0016762,GO:0042546,GO:0048046,GO:0071555	hydrolase activity, hydrolyzing O-glycosyl compounds|cell wall|xyloglucan metabolic process|xyloglucan:xyloglucosyl transferase activity|cell wall biogenesis|apoplast|cell wall organization
LOC18768002	94.1373	148.746	39.529	0.265749	-1.91186	0.00540921	0.0311566	Down	11.0648	5.5988	4.71469	2.66624	1.1093	1.82885	GeneID:18768002	Chlorophyll a-b binding protein CP26, chloroplastic	GO:0009416,GO:0009507,GO:0009517,GO:0009522,GO:0009534,GO:0009535,GO:0009579,GO:0009637,GO:0009768,GO:0009783,GO:0010114,GO:0010196,GO:0010207,GO:0010218,GO:0010287,GO:0015979,GO:0016020,GO:0016021,GO:0016168,GO:0018298,GO:0019904,GO:0042651,GO:0046872	response to light stimulus|chloroplast|PSII associated light-harvesting complex II|photosystem I|chloroplast thylakoid|chloroplast thylakoid membrane|thylakoid|response to blue light|photosynthesis, light harvesting in photosystem I|photosystem II antenna complex|response to red light|nonphotochemical quenching|photosystem II assembly|response to far red light|plastoglobule|photosynthesis|membran…	ko00196	Photosynthesis - antenna proteins
LOC18768004	2366.32	3349.05	1383.59	0.41313	-1.27533	4.45518e-08	1.16686e-06	Down	78.5464	116.088	89.5329	36.2284	35.6446	42.7266	GeneID:18768004	Putative laccase-9	GO:0005507,GO:0016722,GO:0046274,GO:0048046,GO:0052716	copper ion binding|oxidoreductase activity, oxidizing metal ions|lignin catabolic process|apoplast|hydroquinone:oxygen oxidoreductase activity
LOC18768006	143.369	27.5721	259.167	9.3996	3.2326	5.70156e-25	1.03967e-22	Up	0.260493	0.89707	1.67559	8.11884	9.31594	8.68735	GeneID:18768006	TMV resistance protein N	GO:0005524,GO:0005737,GO:0007165,GO:0009626,GO:0043531	ATP binding|cytoplasm|signal transduction|plant-type hypersensitive response|ADP binding
LOC18768007	154.75	235.666	73.8339	0.313299	-1.67439	6.37215e-06	0.000100463	Down	16.414	9.71743	15.5904	4.51368	4.88572	3.4179	GeneID:18768007	Glutathione transferase GST 23	GO:0004364,GO:0005737,GO:0006749,GO:0006952	glutathione transferase activity|cytoplasm|glutathione metabolic process|defense response	ko00982,ko00480,ko00980	Drug metabolism - cytochrome P450|Glutathione metabolism|Metabolism of xenobiotics by cytochrome P450
LOC18768034	8.36989	0	16.7398	Inf	Inf	1.46258e-05	0.000208992	Up	0	0	0	0.291145	0.265437	0.368686	GeneID:18768034	Disease resistance protein RPM1
LOC18768041	570.053	791.087	349.019	0.441189	-1.18053	0.00239145	0.016185	Down	16.7177	11.7018	22.0095	7.47445	6.3993	7.99665	GeneID:18768041
LOC18768044	209.034	289.262	128.806	0.445293	-1.16717	0.00162727	0.0118558	Down	5.4422	6.84389	9.55058	2.93678	2.76716	3.8259	GeneID:18768044	Beta-glucosidase 12	GO:0005576,GO:0005975,GO:0008422,GO:0102483	extracellular region|carbohydrate metabolic process|beta-glucosidase activity|scopolin beta-glucosidase activity	ko00940,ko00460,ko00500	Phenylpropanoid biosynthesis|Cyanoamino acid metabolism|Starch and sucrose metabolism
LOC18768050	61.5083	38.821	84.1956	2.16881	1.11691	0.0049699	0.0291101	Up	1.19949	2.57023	1.1757	3.78745	2.42392	4.25867	GeneID:18768050	2-hydroxyisoflavanone dehydratase	GO:0009717,GO:0009813,GO:0033987,GO:0046287,GO:0052689	isoflavonoid biosynthetic process|flavonoid biosynthetic process|2-hydroxyisoflavanone dehydratase activity|isoflavonoid metabolic process|carboxylic ester hydrolase activity
LOC18768068	887.711	1303.84	471.583	0.361689	-1.46718	0.000155621	0.00161017	Down	10.1081	19.6035	16.9656	5.83455	5.38736	5.28471	GeneID:18768068	TMV resistance protein N	GO:0005524,GO:0005737,GO:0007165,GO:0009626,GO:0043531	ATP binding|cytoplasm|signal transduction|plant-type hypersensitive response|ADP binding
LOC18768078	4973.44	6706.88	3239.99	0.483085	-1.04965	9.30495e-05	0.00103069	Down	311.117	362.22	393.099	241.136	172.069	93.6941	GeneID:18768078	Germin-like protein subfamily 1 member 7	GO:0005618,GO:0030145,GO:0045735,GO:0048046	cell wall|manganese ion binding|nutrient reservoir activity|apoplast
LOC18768080	79.2649	115.081	43.4486	0.377548	-1.40527	0.000355975	0.0032548	Down	3.78753	2.8543	2.39176	1.07815	0.526578	1.74074	GeneID:18768080	Sucrose transport protein SUC2	GO:0005886,GO:0005887,GO:0005985,GO:0008506	plasma membrane|integral component of plasma membrane|sucrose metabolic process|sucrose:proton symporter activity
LOC18768093	146.084	241.67	50.4973	0.208952	-2.25876	0.000226458	0.00220404	Down	12.6577	5.97428	7.25066	1.91619	1.33184	2.06489	GeneID:18768093	Iridoid synthase CYC2	GO:0016627,GO:0043693	oxidoreductase activity, acting on the CH-CH group of donors|monoterpene biosynthetic process
LOC18768095	169.43	3.30804	335.551	101.435	6.66441	1.21922e-50	6.36925e-48	Up	0.0608137	0	0.14902	6.73183	8.23593	6.07912	GeneID:18768095	Protein ACCELERATED CELL DEATH 6	GO:0005887,GO:0008219,GO:0009416,GO:0009615,GO:0009617,GO:0009751,GO:0009816,GO:0016020,GO:0016567,GO:0030176,GO:0050826,GO:0071446,GO:1900150,GO:1900426,GO:1902290,GO:2000031	integral component of plasma membrane|cell death|response to light stimulus|response to virus|response to bacterium|response to salicylic acid|defense response to bacterium, incompatible interaction|membrane|protein ubiquitination|integral component of endoplasmic reticulum membrane|response to freezing|cellular response to salicylic acid stimulus|regulation of defense response to fungus|positive…
LOC18768121	48.0384	0	96.0768	Inf	Inf	1.44141e-26	2.87226e-24	Up	0	0	0	3.38468	2.97561	2.07488	GeneID:18768121	TMV resistance protein N	GO:0005524,GO:0005737,GO:0007165,GO:0009626,GO:0043531	ATP binding|cytoplasm|signal transduction|plant-type hypersensitive response|ADP binding
LOC18768160	163.293	13.3357	313.251	23.4896	4.55395	3.14164e-06	5.27583e-05	Up	0.495424	0.0842525	2.86157	13.5755	39.3435	26.4697	GeneID:18768160	Egg cell-secreted protein 1.1	GO:0005576,GO:0005622,GO:0007338,GO:0009567,GO:0031410,GO:0031982,GO:0048240,GO:0080155,GO:2000008	extracellular region|intracellular|single fertilization|double fertilization forming a zygote and endosperm|cytoplasmic vesicle|vesicle|sperm capacitation|regulation of double fertilization forming a zygote and endosperm|regulation of protein localization to cell surface
LOC18768170	99.9374	37.6388	162.236	4.31034	2.1078	0.00016043	0.00165032	Up	0.694952	2.16109	1.11212	7.85498	3.4141	5.50964	GeneID:18768170	Acetylserotonin O-methyltransferase	GO:0005737,GO:0008171,GO:0008757,GO:0017096,GO:0019438,GO:0030187,GO:0046983	cytoplasm|O-methyltransferase activity|S-adenosylmethionine-dependent methyltransferase activity|acetylserotonin O-methyltransferase activity|aromatic compound biosynthetic process|melatonin biosynthetic process|protein dimerization activity
LOC18768172	501.348	307.168	695.527	2.26432	1.17908	8.8328e-06	0.000133486	Up	4.83939	2.16577	4.75108	7.56703	8.90094	9.63255	GeneID:18768172	TMV resistance protein N	GO:0005524,GO:0005737,GO:0007165,GO:0009626,GO:0043531	ATP binding|cytoplasm|signal transduction|plant-type hypersensitive response|ADP binding
LOC18768185	520.026	181.952	858.1	4.71608	2.23759	5.39739e-14	3.50088e-12	Up	4.17162	3.18286	3.4732	16.5521	13.2905	20.2091	GeneID:18768185	Potassium transporter 5	GO:0006813,GO:0015079,GO:0016020,GO:0016021	potassium ion transport|potassium ion transmembrane transporter activity|membrane|integral component of membrane
LOC18768186	7.01922	0	14.0384	Inf	Inf	9.15926e-05	0.00101923	Up	0	0	0	0.768817	0.650865	0.632825	GeneID:18768186
LOC18768197	994.005	658.015	1330	2.02122	1.01523	0.000278594	0.00263194	Up	15.6347	17.2126	14.859	38.9244	22.1229	33.6829	GeneID:18768197	Probable glucan endo-1,3-beta-glucosidase A6	GO:0005975,GO:0006952,GO:0009793,GO:0010584,GO:0042973,GO:0046658	carbohydrate metabolic process|defense response|embryo development ending in seed dormancy|pollen exine formation|glucan endo-1,3-beta-D-glucosidase activity|anchored component of plasma membrane
LOC18768225	24.1138	45.4973	2.73033	0.0600108	-4.05863	7.24617e-07	1.41049e-05	Down	1.76342	4.36983	2.9763	0.205718	0.133967	0.195381	GeneID:18768225	Monothiol glutaredoxin-S1	GO:0005737,GO:0009055,GO:0015035,GO:0045454,GO:0046872,GO:0051537	cytoplasm|electron transfer activity|protein disulfide oxidoreductase activity|cell redox homeostasis|metal ion binding|2 iron, 2 sulfur cluster binding
LOC18768240	49.1637	14.0514	84.276	5.9977	2.58441	1.20224e-08	3.52626e-07	Up	0.213737	0.239899	0.493819	1.55922	1.955	2.05553	GeneID:18768240	TMV resistance protein N	GO:0005524,GO:0005737,GO:0007165,GO:0009626,GO:0043531	ATP binding|cytoplasm|signal transduction|plant-type hypersensitive response|ADP binding
LOC18768243	440.821	1.62196	880.021	542.565	9.08365	1.28945e-124	8.30794e-121	Up	0.029579	0.0603629	0.0621267	28.1802	26.2058	26.3665	GeneID:18768243	MADS-box protein AGL24	GO:0000060,GO:0000977,GO:0000982,GO:0003700,GO:0005634,GO:0005737,GO:0007275,GO:0008134,GO:0009739,GO:0010077,GO:0010220,GO:0030154,GO:0043565,GO:0044212,GO:0045893,GO:0045944,GO:0046982,GO:0048438,GO:0048510	protein import into nucleus, translocation|RNA polymerase II regulatory region sequence-specific DNA binding|transcription factor activity, RNA polymerase II proximal promoter sequence-specific DNA binding|DNA-binding transcription factor activity|nucleus|cytoplasm|multicellular organism development|transcription factor binding|response to gibberellin|maintenance of inflorescence meristem identit…
LOC18768244	179.371	103.967	254.775	2.45054	1.2931	0.000485652	0.004238	Up	1.60968	1.89618	0.824615	2.65033	3.31269	4.34412	GeneID:18768244	TMV resistance protein N	GO:0005524,GO:0005737,GO:0007165,GO:0009626,GO:0043531	ATP binding|cytoplasm|signal transduction|plant-type hypersensitive response|ADP binding
LOC18768253	41.4411	71.9097	10.9726	0.152588	-2.71229	4.91617e-08	1.27038e-06	Down	3.81917	2.74072	2.9971	0.548355	0.491008	0.3906	GeneID:18768253
LOC18768259	42.8384	62.8867	22.7901	0.362399	-1.46435	0.00146881	0.0108735	Down	2.10198	2.1768	1.97683	0.751499	0.433775	1.03816	GeneID:18768259	Cyclin-D4-1	GO:0000079,GO:0000278,GO:0000307,GO:0005634,GO:0005737,GO:0006468,GO:0007088,GO:0008284,GO:0016538,GO:0019901,GO:0045787,GO:0051301	regulation of cyclin-dependent protein serine/threonine kinase activity|mitotic cell cycle|cyclin-dependent protein kinase holoenzyme complex|nucleus|cytoplasm|protein phosphorylation|regulation of mitotic nuclear division|positive regulation of cell proliferation|cyclin-dependent protein serine/threonine kinase regulator activity|protein kinase binding|positive regulation of cell cycle|cell divi…
LOC18768265	121.23	77.253	165.207	2.13851	1.09661	0.000247542	0.00237692	Up	2.02894	2.35141	1.76248	5.29101	3.70312	3.88541	GeneID:18768265	UDP-glucose flavonoid 3-O-glucosyltransferase 7	GO:0047893,GO:0102360,GO:0102425	flavonol 3-O-glucosyltransferase activity|daphnetin 3-O-glucosyltransferase activity|myricetin 3-O-glucosyltransferase activity
LOC18768295	9.16597	1.26456	17.0674	13.4967	3.75453	0.000945213	0.00748605	Up	0.10249	0.0348592	0	0.483567	0.508695	0.81255	GeneID:18768295	Putative UDP-glucose glucosyltransferase	GO:0016758	transferase activity, transferring hexosyl groups
LOC18768308	6845.99	3777.23	9914.76	2.62488	1.39225	1.15488e-05	0.000168473	Up	202.038	147.561	103.232	302.413	395.693	459.46	GeneID:18768308	Protein EXORDIUM-like 2	GO:0005615,GO:0005618,GO:0005794,GO:0005829,GO:0009505,GO:0009506,GO:0048046	extracellular space|cell wall|Golgi apparatus|cytosol|plant-type cell wall|plasmodesma|apoplast
LOC18768309	158.83	100.73	216.93	2.15358	1.10674	4.86388e-05	0.00059054	Up	3.12893	6.48509	6.00712	12.2965	11.0235	9.60574	GeneID:18768309	Probable BOI-related E3 ubiquitin-protein ligase 3	GO:0004842,GO:0005634,GO:0006952,GO:0043067,GO:0043161,GO:0046872	ubiquitin-protein transferase activity|nucleus|defense response|regulation of programmed cell death|proteasome-mediated ubiquitin-dependent protein catabolic process|metal ion binding
LOC18768310	51.9007	18.6444	85.157	4.56744	2.19139	3.74659e-07	7.82895e-06	Up	0.212955	0.201771	0.479232	1.44089	1.19718	1.38422	GeneID:18768310	Putative disease resistance protein At1g50180
LOC18768312	475.658	267.007	684.309	2.56289	1.35777	2.28177e-06	3.9414e-05	Up	4.93876	7.49933	7.37432	12.8955	18.8203	17.742	GeneID:18768312	Protein HYPER-SENSITIVITY-RELATED 4	GO:0002237,GO:0005524,GO:0005739,GO:0005740,GO:0005741,GO:0008219,GO:0009411,GO:0009617,GO:0009626,GO:0009863,GO:0016021,GO:0016887,GO:0042802	response to molecule of bacterial origin|ATP binding|mitochondrion|mitochondrial envelope|mitochondrial outer membrane|cell death|response to UV|response to bacterium|plant-type hypersensitive response|salicylic acid mediated signaling pathway|integral component of membrane|ATPase activity|identical protein binding
LOC18768322	187.415	262.033	112.796	0.430464	-1.21604	3.22621e-06	5.39442e-05	Down	9.02344	10.2303	8.52865	4.25743	3.34122	4.11261	GeneID:18768322
LOC18768372	295.423	412.6	178.245	0.432004	-1.21088	0.00292353	0.0190074	Down	25.6777	15.8657	29.7837	8.28612	8.67637	13.2483	GeneID:18768372	Pathogen-related protein	GO:0006952,GO:0009607	defense response|response to biotic stimulus
LOC18768373	107.11	62.8434	151.377	2.40881	1.26832	5.64659e-05	0.000675381	Up	1.52002	1.718	1.42439	2.90264	4.30279	3.72407	GeneID:18768373	DELLA protein GAI1
LOC18768382	69.953	9.39734	130.509	13.8878	3.79575	0.000102286	0.00111953	Up	0.368492	0.187999	0.354736	1.97266	4.01718	6.35096	GeneID:18768382	UDP-glucose flavonoid 3-O-glucosyltransferase 7	GO:0047893,GO:0102360,GO:0102425	flavonol 3-O-glucosyltransferase activity|daphnetin 3-O-glucosyltransferase activity|myricetin 3-O-glucosyltransferase activity
LOC18768384	557.967	265.72	850.214	3.19966	1.67792	5.94063e-07	1.18134e-05	Up	7.89226	12.578	11.209	29.0123	41.2506	28.4482	GeneID:18768384	Chloroplast envelope quinone oxidoreductase homolog	GO:0005773,GO:0005886,GO:0009507,GO:0009535,GO:0009706,GO:0009941,GO:0016491	vacuole|plasma membrane|chloroplast|chloroplast thylakoid membrane|chloroplast inner membrane|chloroplast envelope|oxidoreductase activity
LOC18768404	10.881	3.26559	18.4965	5.66406	2.50184	0.00718301	0.039258	Up	0.0771665	0.0524922	0.135065	0.616145	0.465077	0.398989	GeneID:18768404	Probable 2-oxoglutarate-dependent dioxygenase At5g05600	GO:0005829,GO:0009813,GO:0046872,GO:0051213,GO:0080167,GO:0097237,GO:0120091,GO:2000022	cytosol|flavonoid biosynthetic process|metal ion binding|dioxygenase activity|response to karrikin|cellular response to toxic substance|jasmonic acid hydrolase|regulation of jasmonic acid mediated signaling pathway
LOC18768407	84.2192	48.2686	120.17	2.48961	1.31592	0.000119421	0.00127883	Up	1.79405	1.32209	1.95386	3.32798	4.2049	4.80983	GeneID:18768407	Secoisolariciresinol dehydrogenase (Fragment)	GO:0009807,GO:0102911	lignan biosynthetic process|(-)-secoisolariciresinol dehydrogenase activity
LOC18768418	89.2063	1.62283	176.79	108.939	6.76738	1.41765e-38	5.17015e-36	Up	0.0833855	0	0.0583801	5.20536	5.14384	4.8863	GeneID:18768418	Probable LRR receptor-like serine/threonine-protein kinase At2g24230	GO:0004674,GO:0005524,GO:0016021	protein serine/threonine kinase activity|ATP binding|integral component of membrane
LOC18768424	3058.47	860.22	5256.71	6.1109	2.61138	2.62128e-06	4.45617e-05	Up	36.8208	45.1551	35.3296	142.072	287.11	266.179	GeneID:18768424	Ethylene-responsive transcription factor ERF109	GO:0003677,GO:0003700,GO:0005634,GO:0009873,GO:0010087,GO:0010200,GO:0010928,GO:0050832,GO:0051301,GO:0090357	DNA binding|DNA-binding transcription factor activity|nucleus|ethylene-activated signaling pathway|phloem or xylem histogenesis|response to chitin|regulation of auxin mediated signaling pathway|defense response to fungus|cell division|regulation of tryptophan metabolic process
LOC18768442	3329.25	85.414	6573.1	76.9557	6.26596	2.67754e-80	4.70492e-77	Up	2.22464	5.09744	3.27899	289.944	288.91	216.812	GeneID:18768442	Flavanone 3-dioxygenase 3	GO:0009813,GO:0031418,GO:0045486,GO:0046872,GO:0051213,GO:0071456,GO:0080167	flavonoid biosynthetic process|L-ascorbic acid binding|naringenin 3-dioxygenase activity|metal ion binding|dioxygenase activity|cellular response to hypoxia|response to karrikin
LOC18768444	47.7447	27.5578	67.9316	2.46506	1.30162	0.00260132	0.0173144	Up	0.685422	0.512881	0.791801	1.99012	1.6767	1.1577	GeneID:18768444	TMV resistance protein N	GO:0005524,GO:0005737,GO:0007165,GO:0009626,GO:0043531	ATP binding|cytoplasm|signal transduction|plant-type hypersensitive response|ADP binding
LOC18768469	131.083	180.221	81.9438	0.454684	-1.13706	0.0003275	0.0030261	Down	10.8465	15.1089	8.9591	6.4357	5.18477	3.90683	GeneID:18768469	Uncharacterized protein At1g32220, chloroplastic	GO:0003954,GO:0005747,GO:0006979,GO:0009507,GO:0009579,GO:0010287,GO:1901006	NADH dehydrogenase activity|mitochondrial respiratory chain complex I|response to oxidative stress|chloroplast|thylakoid|plastoglobule|ubiquinone-6 biosynthetic process
LOC18768479	307.083	195.796	418.37	2.13677	1.09543	1.41151e-06	2.56903e-05	Up	5.45274	3.61029	5.92999	9.28813	10.4905	11.6031	GeneID:18768479
LOC18768488	57.5288	80.7478	34.3099	0.424902	-1.2348	0.00190228	0.0134834	Down	2.96916	3.90066	2.65044	1.61643	1.38159	0.959501	GeneID:18768488	Malate dehydrogenase, glyoxysomal	GO:0006097,GO:0006099,GO:0006108,GO:0009514,GO:0030060	glyoxylate cycle|tricarboxylic acid cycle|malate metabolic process|glyoxysome|L-malate dehydrogenase activity	ko00710,ko01200,ko00630,ko00620,ko00020,ko00270	Carbon fixation in photosynthetic organisms|Carbon metabolism|Glyoxylate and dicarboxylate metabolism|Pyruvate metabolism|Citrate cycle (TCA cycle)|Cysteine and methionine metabolism
LOC18768493	5231.99	2317.65	8146.33	3.51491	1.81349	1.62822e-06	2.91946e-05	Up	134.538	149.628	98.2479	386.294	559.989	360.759	GeneID:18768493	Pathogen-related protein	GO:0006952,GO:0009607	defense response|response to biotic stimulus
LOC18768500	104.934	65.1571	144.711	2.22096	1.15118	0.000205013	0.00202696	Up	0.514024	0.695524	1.09137	1.78853	1.29545	1.94132	GeneID:18768500	BRCT domain-containing protein At4g02110
LOC18768537	448.498	740.276	156.72	0.211705	-2.23988	2.2045e-05	0.000298813	Down	36.4971	18.3252	29.7142	3.61974	3.76644	10.1267	GeneID:18768537	Endochitinase 1	GO:0000272,GO:0004568,GO:0005773,GO:0006032,GO:0006952,GO:0008061,GO:0016998	polysaccharide catabolic process|chitinase activity|vacuole|chitin catabolic process|defense response|chitin binding|cell wall macromolecule catabolic process	ko00520	Amino sugar and nucleotide sugar metabolism
LOC18768581	874.354	574.787	1173.92	2.04236	1.03024	9.38803e-08	2.28253e-06	Up	12.3519	13.6827	6.74005	22.6816	20.5733	22.0424	GeneID:18768581	Subtilisin-like protease SBT1.6	GO:0004252,GO:0008236,GO:0009827,GO:0016020	serine-type endopeptidase activity|serine-type peptidase activity|plant-type cell wall modification|membrane
LOC18768593	16.1634	30.5899	1.73684	0.0567783	-4.13852	9.58204e-05	0.00105896	Down	1.0534	1.24022	0.34039	0.0588184	0.0861827	0	GeneID:18768593	2-carboxy-1,4-naphthoquinone phytyltransferase, chloroplastic	GO:0004659,GO:0009507,GO:0009772,GO:0010236,GO:0016021,GO:0031969,GO:0042371,GO:0042372,GO:0046428	prenyltransferase activity|chloroplast|photosynthetic electron transport in photosystem II|plastoquinone biosynthetic process|integral component of membrane|chloroplast membrane|vitamin K biosynthetic process|phylloquinone biosynthetic process|1,4-dihydroxy-2-naphthoate octaprenyltransferase activity	ko00130	Ubiquinone and other terpenoid-quinone biosynthesis
LOC18768601	36.9372	6.11053	67.7639	11.0897	3.47115	3.80156e-09	1.22264e-07	Up	0.344366	0.195211	0.200916	3.24957	1.62782	3.20498	GeneID:18768601	Beta-carotene isomerase D27, chloroplastic	GO:0005506,GO:0009507,GO:0010223,GO:0016859,GO:1901601	iron ion binding|chloroplast|secondary shoot formation|cis-trans isomerase activity|strigolactone biosynthetic process	ko00906	Carotenoid biosynthesis
LOC18768605	61.1625	116.842	5.48292	0.0469259	-4.41347	7.50863e-05	0.000862355	Down	1.31046	0.975006	2.73811	0.0445889	0.0871109	0.0988126	GeneID:18768605	Receptor-like protein kinase 2
LOC18768607	10.6688	1.28449	20.053	15.6117	3.96455	0.00123638	0.00937175	Up	0	0.0817236	0.0280372	0.37789	0.340737	0.938664	GeneID:18768607	Cytochrome P450 78A7	GO:0005506,GO:0007275,GO:0016020,GO:0016021,GO:0016709,GO:0020037,GO:0040008	iron ion binding|multicellular organism development|membrane|integral component of membrane|oxidoreductase activity, acting on paired donors, with incorporation or reduction of molecular oxygen, NAD(P)H as one donor, and incorporation of one atom of oxygen|heme binding|regulation of growth
LOC18768611	73.0315	45.0438	101.019	2.24269	1.16523	0.0013181	0.00990957	Up	1.73021	1.63221	1.30278	4.01656	3.22905	3.00452	GeneID:18768611	Probable 2-oxoglutarate-dependent dioxygenase At5g05600	GO:0005829,GO:0009813,GO:0046872,GO:0051213,GO:0080167,GO:0097237,GO:0120091,GO:2000022	cytosol|flavonoid biosynthetic process|metal ion binding|dioxygenase activity|response to karrikin|cellular response to toxic substance|jasmonic acid hydrolase|regulation of jasmonic acid mediated signaling pathway
LOC18768622	2055.14	982.621	3127.67	3.18299	1.67038	4.63925e-19	5.33762e-17	Up	25.8101	33.7427	30.2212	82.9897	103.033	92.6411	GeneID:18768622
LOC18768630	71.2268	38.6347	103.819	2.68719	1.4261	0.000130558	0.00138348	Up	1.13455	1.68688	1.15745	2.6824	4.41302	3.28508	GeneID:18768630	Probable transcriptional regulator RABBIT EARS	GO:0003676,GO:0003700,GO:0005634,GO:0006355,GO:0009409,GO:0030154,GO:0046872,GO:0048441	nucleic acid binding|DNA-binding transcription factor activity|nucleus|regulation of transcription, DNA-templated|response to cold|cell differentiation|metal ion binding|petal development
LOC18768650	201.596	403.193	0	0	#NAME?	2.85406e-31	7.45489e-29	Down	9.69267	12.7524	6.80203	0	0	0	GeneID:18768650
LOC18768668	30.6996	0.337042	61.0622	181.171	7.50121	1.35246e-16	1.18288e-14	Up	0	0	0.0113524	0.470798	0.793303	0.771316	GeneID:18768668	TMV resistance protein N	GO:0005524,GO:0005737,GO:0007165,GO:0009626,GO:0043531	ATP binding|cytoplasm|signal transduction|plant-type hypersensitive response|ADP binding
LOC18768692	147.132	84.6025	209.661	2.47819	1.30929	3.21112e-06	5.37848e-05	Up	2.76891	3.54159	4.13654	7.17613	9.66441	8.42867	GeneID:18768692
LOC18768693	65.7967	105.708	25.8855	0.244877	-2.02987	1.83362e-07	4.18442e-06	Down	4.2373	2.70987	3.03975	0.584825	1.20602	0.586295	GeneID:18768693	Serine carboxypeptidase-like 18	GO:0004185,GO:0005576,GO:0019748	serine-type carboxypeptidase activity|extracellular region|secondary metabolic process
LOC18768700	2923.79	3910.02	1937.55	0.495536	-1.01294	6.60383e-09	2.0456e-07	Down	106.86	118.535	119.95	53.8051	64.9787	48.3344	GeneID:18768700	Protein DMR6-LIKE OXYGENASE 2	GO:0002229,GO:0046244,GO:0046872,GO:0051213	defense response to oomycetes|salicylic acid catabolic process|metal ion binding|dioxygenase activity
LOC18768710	289.558	180.136	398.98	2.21488	1.14723	8.46173e-05	0.000951464	Up	4.21064	5.71886	6.30426	12.5147	13.8586	8.7967	GeneID:18768710	Tryptophan aminotransferase-related protein 4	GO:0008483,GO:0016021,GO:0016846	transaminase activity|integral component of membrane|carbon-sulfur lyase activity
LOC18768712	36.5207	20.1394	52.902	2.62679	1.3933	0.008147	0.0432382	Up	0.501062	0.697184	0.263104	0.892739	1.06584	1.76641	GeneID:18768712	Poly [ADP-ribose] polymerase 2	GO:0003677,GO:0003950,GO:0005634,GO:0005730,GO:0006302,GO:0070212,GO:1990404	DNA binding|NAD+ ADP-ribosyltransferase activity|nucleus|nucleolus|double-strand break repair|protein poly-ADP-ribosylation|protein ADP-ribosylase activity	ko04214,ko04210,ko03410	Apoptosis - fly|Apoptosis|Base excision repair
LOC18768720	12.768	25.536	0	0	#NAME?	1.09915e-07	2.63918e-06	Down	3.61434	3.08991	1.23104	0	0	0	GeneID:18768720
LOC18768723	156.289	249.333	63.2457	0.253659	-1.97904	3.76461e-12	1.92503e-10	Down	4.10285	4.30134	4.30875	0.875929	0.975415	1.29778	GeneID:18768723	Protein MAIN-LIKE 2	GO:0005634,GO:0008483	nucleus|transaminase activity
LOC18768741	65.8066	95.2055	36.4076	0.382411	-1.38681	0.000289822	0.00272469	Down	0.873525	0.84805	0.837204	0.341659	0.18942	0.429731	GeneID:18768741	Transcription factor GTE12	GO:0005634	nucleus
LOC18768743	31.3589	13.9071	48.8106	3.50975	1.81137	0.000705345	0.00586896	Up	0.58274	0.237844	0.458988	0.983467	1.89036	1.50653	GeneID:18768743	Protein SCARECROW	GO:0003700,GO:0005634,GO:0008356,GO:0009630,GO:0009956,GO:0043565,GO:0048366,GO:0051457,GO:0090610	DNA-binding transcription factor activity|nucleus|asymmetric cell division|gravitropism|radial pattern formation|sequence-specific DNA binding|leaf development|maintenance of protein location in nucleus|bundle sheath cell fate specification
LOC18768754	209.934	72.5167	347.352	4.78996	2.26001	1.03292e-17	1.01347e-15	Up	0.779397	0.71862	0.660725	3.38425	3.39569	3.33071	GeneID:18768754
LOC18768797	6.44143	0.632498	12.2504	19.3682	4.27562	0.00314078	0.0201487	Up	0.132545	0	0	0.938057	0.4934	1.09652	GeneID:18768797
LOC18768803	100.742	169.006	32.4773	0.192167	-2.37957	2.27175e-07	5.00691e-06	Down	8.64259	5.16572	5.54452	1.73241	0.961513	0.972258	GeneID:18768803
LOC18768848	21.4272	0	42.8543	Inf	Inf	6.30646e-13	3.5958e-11	Up	0	0	0	3.84844	5.40391	5.36836	GeneID:18768848	Egg cell-secreted protein 1.1	GO:0005576,GO:0005622,GO:0007338,GO:0009567,GO:0031410,GO:0031982,GO:0048240,GO:0080155,GO:2000008	extracellular region|intracellular|single fertilization|double fertilization forming a zygote and endosperm|cytoplasmic vesicle|vesicle|sperm capacitation|regulation of double fertilization forming a zygote and endosperm|regulation of protein localization to cell surface
LOC18768860	525.111	754.823	295.399	0.391349	-1.35347	6.4273e-11	2.76074e-09	Down	10.6863	14.7015	11.6119	5.34692	4.07328	4.75885	GeneID:18768860	Probable LRR receptor-like serine/threonine-protein kinase At5g48740
LOC18768870	385.982	234.726	537.238	2.28879	1.19458	3.9305e-05	0.000491733	Up	5.00254	9.0186	2.77992	12.6278	12.6692	12.0629	GeneID:18768870	Pescadillo homolog	GO:0000463,GO:0000466,GO:0005654,GO:0005730,GO:0030687,GO:0043021,GO:0070545,GO:0090069,GO:2000232	maturation of LSU-rRNA from tricistronic rRNA transcript (SSU-rRNA, 5.8S rRNA, LSU-rRNA)|maturation of 5.8S rRNA from tricistronic rRNA transcript (SSU-rRNA, 5.8S rRNA, LSU-rRNA)|nucleoplasm|nucleolus|preribosome, large subunit precursor|ribonucleoprotein complex binding|PeBoW complex|regulation of ribosome biogenesis|regulation of rRNA processing
LOC18768873	36.7943	10.9543	62.6343	5.71776	2.51545	7.23762e-06	0.000111917	Up	0.576773	0.82393	0.605718	2.63759	5.03023	3.45936	GeneID:18768873
LOC18768881	131.719	6.71704	256.721	38.2194	5.25623	7.70653e-06	0.000118063	Up	0	0.880308	0.213184	23.2076	8.6361	9.0265	GeneID:18768881	Organ-specific protein S2
LOC18768896	259.764	89.078	430.45	4.83227	2.2727	0.000226981	0.00220801	Up	3.74254	2.39783	6.07834	11.6562	19.0693	27.0461	GeneID:18768896
LOC18768900	1128.19	1861.59	394.792	0.212072	-2.23737	7.34323e-31	1.8676e-28	Down	60.0097	55.987	57.2528	13.4644	11.4341	11.1172	GeneID:18768900	Purple acid phosphatase	GO:0003993,GO:0005615,GO:0030145,GO:0046872	acid phosphatase activity|extracellular space|manganese ion binding|metal ion binding
LOC18768910	29.0975	52.7303	5.46464	0.103634	-3.27043	1.4781e-07	3.47146e-06	Down	0.668311	0.7295	1.19151	0.118457	0.0661209	0.0803604	GeneID:18768910	MDIS1-interacting receptor like kinase 2
LOC18768934	28.4621	13.4406	43.4837	3.23525	1.69388	0.00244723	0.0165105	Up	0.173704	0.224507	0.0972912	0.542175	0.504976	0.514931	GeneID:18768934	Protein CHROMATIN REMODELING 35	GO:0000419,GO:0003677,GO:0004386,GO:0005524,GO:0005634,GO:0006306,GO:0031618,GO:0032776,GO:0035563,GO:0050832,GO:0060964,GO:0060966,GO:0060968,GO:0070829,GO:0071360,GO:0080188,GO:0090577,GO:1900111,GO:1900368,GO:1900370	RNA polymerase V complex|DNA binding|helicase activity|ATP binding|nucleus|DNA methylation|nuclear pericentric heterochromatin|DNA methylation on cytosine|positive regulation of chromatin binding|defense response to fungus|regulation of gene silencing by miRNA|regulation of gene silencing by RNA|regulation of gene silencing|heterochromatin maintenance|cellular response to exogenous dsRNA|RNA-dire…	ko03440	Homologous recombination
LOC18768947	18.1148	1.57908	34.6506	21.9435	4.45572	1.83266e-07	4.18442e-06	Up	0	0.219385	0	1.73235	1.64646	1.24509	GeneID:18768947	TMV resistance protein N	GO:0005524,GO:0005737,GO:0007165,GO:0009626,GO:0043531	ATP binding|cytoplasm|signal transduction|plant-type hypersensitive response|ADP binding
LOC18768949	151.968	208.308	95.6287	0.459073	-1.1232	8.05432e-05	0.000915173	Down	14.9255	11.4684	13.4534	3.28969	8.09788	6.37374	GeneID:18768949	Calvin cycle protein CP12-1, chloroplastic	GO:0005507,GO:0009507,GO:0009570,GO:0009744,GO:0009941,GO:0016151,GO:0019253,GO:0032991,GO:0080153	copper ion binding|chloroplast|chloroplast stroma|response to sucrose|chloroplast envelope|nickel cation binding|reductive pentose-phosphate cycle|protein-containing complex|negative regulation of reductive pentose-phosphate cycle
LOC18768950	1851.58	2494.95	1208.21	0.484264	-1.04613	5.2852e-09	1.66652e-07	Down	213.229	206.924	229.107	76.0468	118.156	112.162	GeneID:18768950	Protein CASPARIAN STRIP INTEGRITY FACTOR 1	GO:0005179,GO:0007275,GO:0010039,GO:0010447,GO:0048226,GO:0050801,GO:0055072,GO:0071555,GO:2000067	hormone activity|multicellular organism development|response to iron ion|response to acidic pH|Casparian strip|ion homeostasis|iron ion homeostasis|cell wall organization|regulation of root morphogenesis
LOC18768953	183.171	121.341	245.002	2.01912	1.01373	0.000118087	0.00126595	Up	2.86702	4.09558	2.25817	5.41085	6.35269	6.34956	GeneID:18768953	RING-H2 finger protein ATL5	GO:0016020,GO:0016021,GO:0016567,GO:0016740,GO:0031625,GO:0046872	membrane|integral component of membrane|protein ubiquitination|transferase activity|ubiquitin protein ligase binding|metal ion binding
LOC18768982	6092.54	3494.55	8690.54	2.48688	1.31434	2.11796e-07	4.71093e-06	Up	90.5276	81.1048	100.946	175.318	242.241	244.142	GeneID:18768982	Inorganic phosphate transporter 1-4	GO:0005315,GO:0005634,GO:0005773,GO:0005794,GO:0005886,GO:0006817,GO:0009506,GO:0009737,GO:0015293,GO:0016020,GO:0016021	inorganic phosphate transmembrane transporter activity|nucleus|vacuole|Golgi apparatus|plasma membrane|phosphate ion transport|plasmodesma|response to abscisic acid|symporter activity|membrane|integral component of membrane
LOC18769001	59.3237	26.8166	91.8309	3.42441	1.77585	2.2119e-05	0.000299051	Up	0.245135	0.375192	0.327647	0.715794	1.16139	1.27899	GeneID:18769001	TMV resistance protein N	GO:0005524,GO:0005737,GO:0007165,GO:0009626,GO:0043531	ATP binding|cytoplasm|signal transduction|plant-type hypersensitive response|ADP binding
LOC18769016	41.8586	77.25	6.46727	0.0837187	-3.57831	1.53941e-11	7.20468e-10	Down	2.92871	3.99795	2.78474	0.258553	0.168374	0.368341	GeneID:18769016	Floral homeotic protein DEFICIENS	GO:0000977,GO:0003700,GO:0005634,GO:0007275,GO:0045944,GO:0046983	RNA polymerase II regulatory region sequence-specific DNA binding|DNA-binding transcription factor activity|nucleus|multicellular organism development|positive regulation of transcription by RNA polymerase II|protein dimerization activity
LOC18769038	270.476	143.855	397.098	2.7604	1.46488	0.00360864	0.022566	Up	4.01834	2.05913	1.98916	4.89562	6.83434	9.97653	GeneID:18769038	Protein NUCLEAR FUSION DEFECTIVE 4	GO:0000741,GO:0005739,GO:0009651,GO:0010197,GO:0016021	karyogamy|mitochondrion|response to salt stress|polar nucleus fusion|integral component of membrane
LOC18769110	385.082	769.459	0.705224	0.00091652	-10.0915	1.05255e-34	3.22931e-32	Down	23.2262	20.4338	33.3765	0	0.067402	0	GeneID:18769110	Aquaporin SIP1-1	GO:0015267,GO:0016021	channel activity|integral component of membrane
LOC18769112	12.4924	0.337042	24.6477	73.1294	6.19238	5.48923e-07	1.10407e-05	Up	0	0	0.019654	0.407538	0.477711	0.541883	GeneID:18769112	B3 domain-containing transcription factor VRN1	GO:0003677,GO:0005654,GO:0009909,GO:0010048,GO:0043565	DNA binding|nucleoplasm|regulation of flower development|vernalization response|sequence-specific DNA binding
LOC18769171	9029.41	13813.5	4245.34	0.307333	-1.70213	7.74662e-23	1.25827e-20	Down	1227.65	1275.46	1007.49	347.95	316.8	389.849	GeneID:18769171
LOC18769175	213.889	94.9642	332.814	3.50463	1.80926	5.42226e-09	1.70418e-07	Up	3.93722	5.88853	6.40044	20.671	21.1097	13.8876	GeneID:18769175	Lachrymatory-factor synthase
LOC18769183	314.063	107.657	520.468	4.8345	2.27337	8.36929e-22	1.24438e-19	Up	2.37855	2.11239	3.00675	11.726	11.22	12.5944	GeneID:18769183	Cytochrome P450 94C1	GO:0005506,GO:0005789,GO:0009611,GO:0016021,GO:0018685,GO:0020037,GO:0043231	iron ion binding|endoplasmic reticulum membrane|response to wounding|integral component of membrane|alkane 1-monooxygenase activity|heme binding|intracellular membrane-bounded organelle
LOC18769210	1218.97	1682.25	755.688	0.449214	-1.15453	5.3378e-10	1.96898e-08	Down	62.4998	51.6964	66.3129	29.3913	25.3558	24.8284	GeneID:18769210	Probable ethanolamine kinase	GO:0004305,GO:0005524,GO:0005886,GO:0006646,GO:0008654	ethanolamine kinase activity|ATP binding|plasma membrane|phosphatidylethanolamine biosynthetic process|phospholipid biosynthetic process	ko00564	Glycerophospholipid metabolism
LOC18769213	31.7615	0.631632	62.8914	99.5697	6.63763	2.30582e-15	1.74782e-13	Up	0	0.0556547	0	2.49429	1.39227	1.46649	GeneID:18769213	F-box/LRR-repeat protein At4g14103
LOC18769225	55.9776	5.4802	106.475	19.4291	4.28014	1.99789e-07	4.47996e-06	Up	0.513401	0	0.224652	4.4254	2.86672	6.85756	GeneID:18769225	Patatin-like protein 3	GO:0004620,GO:0005737,GO:0006952,GO:0009737,GO:0016042,GO:0047372	phospholipase activity|cytoplasm|defense response|response to abscisic acid|lipid catabolic process|acylglycerol lipase activity
LOC18769242	79.0366	29.957	128.116	4.27668	2.09649	9.44216e-09	2.82957e-07	Up	1.67875	2.05554	1.5867	7.98161	8.51081	5.72879	GeneID:18769242	Agamous-like MADS-box protein AGL82	GO:0000982,GO:0000987,GO:0003700,GO:0005634,GO:0045944,GO:0046983	transcription factor activity, RNA polymerase II proximal promoter sequence-specific DNA binding|proximal promoter sequence-specific DNA binding|DNA-binding transcription factor activity|nucleus|positive regulation of transcription by RNA polymerase II|protein dimerization activity
LOC18769254	94.9573	60.0482	129.866	2.1627	1.11284	0.000573177	0.00490653	Up	1.36496	0.795862	1.53584	2.22927	2.36426	3.24645	GeneID:18769254	Peroxisomal acyl-coenzyme A oxidase 1	GO:0001676,GO:0003997,GO:0005504,GO:0005777,GO:0006635,GO:0009506,GO:0009611,GO:0009620,GO:0009695,GO:0033540,GO:0046686,GO:0050660,GO:0055088,GO:0071949	long-chain fatty acid metabolic process|acyl-CoA oxidase activity|fatty acid binding|peroxisome|fatty acid beta-oxidation|plasmodesma|response to wounding|response to fungus|jasmonic acid biosynthetic process|fatty acid beta-oxidation using acyl-CoA oxidase|response to cadmium ion|flavin adenine dinucleotide binding|lipid homeostasis|FAD binding	ko04024,ko00592,ko00071,ko04146,ko01040,ko01212	cAMP signaling pathway|alpha-Linolenic acid metabolism|Fatty acid degradation|Peroxisome|Biosynthesis of unsaturated fatty acids|Fatty acid metabolism
LOC18769271	8.69581	16.0074	1.38423	0.0864745	-3.53158	0.00619851	0.0347884	Down	0.142652	0.436672	0.14981	0.0310642	0.0303442	0	GeneID:18769271	MDIS1-interacting receptor like kinase 2
LOC18769278	368.879	3.4991	734.26	209.843	7.71316	8.1874e-106	3.16509e-102	Up	0.116015	0.0131531	0.0135374	8.85631	10.2003	10.2375	GeneID:18769278	Serine carboxypeptidase-like 42	GO:0004185,GO:0005576,GO:0005618,GO:0005773,GO:0051603	serine-type carboxypeptidase activity|extracellular region|cell wall|vacuole|proteolysis involved in cellular protein catabolic process
LOC18769318	290.139	112.172	468.107	4.17311	2.06112	8.18731e-18	8.15734e-16	Up	5.16577	3.9156	4.03001	17.396	16.9535	19.1928	GeneID:18769318	SPX domain-containing protein 2	GO:0005634,GO:0016036	nucleus|cellular response to phosphate starvation
LOC18769331	2165.5	1401.89	2929.11	2.0894	1.06309	1.71357e-05	0.000240535	Up	38.2916	56.0116	38.2135	87.6284	106.134	75.9332	GeneID:18769331	Anthocyanidin 3-O-glucosyltransferase 5	GO:0009718,GO:0047213	anthocyanin-containing compound biosynthetic process|anthocyanidin 3-O-glucosyltransferase activity	ko00940	Phenylpropanoid biosynthesis
LOC18769341	444.358	716.274	172.442	0.240748	-2.0544	2.55683e-19	2.99521e-17	Down	40.884	35.4095	46.5802	10.2727	11.188	7.51362	GeneID:18769341
LOC18769406	195.083	355.07	35.0962	0.0988428	-3.33872	6.21018e-31	1.60049e-28	Down	11.4934	11.5908	14.5687	0.948597	1.60375	1.07418	GeneID:18769406	2-alkenal reductase (NADP(+)-dependent)	GO:0016491	oxidoreductase activity
LOC18769416	58.0658	84.2075	31.9242	0.379114	-1.3993	0.00046185	0.00406701	Down	2.57207	2.5953	2.46105	1.08908	1.03345	0.709274	GeneID:18769416	Glucan endo-1,3-beta-glucosidase 8	GO:0005618,GO:0005886,GO:0005975,GO:0006952,GO:0009506,GO:0009664,GO:0031225,GO:0042973,GO:0046658,GO:0048046	cell wall|plasma membrane|carbohydrate metabolic process|defense response|plasmodesma|plant-type cell wall organization|anchored component of membrane|glucan endo-1,3-beta-D-glucosidase activity|anchored component of plasma membrane|apoplast
LOC18769421	111.727	175.693	47.7602	0.271838	-1.87918	3.30011e-09	1.0775e-07	Down	3.80149	3.02701	3.05949	0.83169	0.680161	1.12055	GeneID:18769421	U11/U12 small nuclear ribonucleoprotein 25 kDa protein	GO:0005681,GO:0006397,GO:0008380	spliceosomal complex|mRNA processing|RNA splicing
LOC18769422	140.945	189.053	92.8363	0.49106	-1.02603	0.000256895	0.00246062	Down	12.3269	15.4161	10.2236	5.71282	7.5302	4.90279	GeneID:18769422
LOC18769435	42.8684	70.6599	15.0768	0.213371	-2.22856	0.00020069	0.00199236	Down	3.99015	4.64621	1.92265	1.17558	0.649057	0.388349	GeneID:18769435	Methylesterase 10	GO:0009694,GO:0009696,GO:0016788,GO:0080030,GO:0080031,GO:0080032	jasmonic acid metabolic process|salicylic acid metabolic process|hydrolase activity, acting on ester bonds|methyl indole-3-acetate esterase activity|methyl salicylate esterase activity|methyl jasmonate esterase activity
LOC18769442	17.7518	29.7256	5.77792	0.194375	-2.36308	0.00118824	0.00907087	Down	1.15677	1.30243	1.2986	0.434312	0.0848491	0.206244	GeneID:18769442	Red chlorophyll catabolite reductase, chloroplastic	GO:0005737,GO:0005739,GO:0005829,GO:0009507,GO:0009535,GO:0009570,GO:0009814,GO:0009941,GO:0010363,GO:0015996,GO:0043067,GO:0051743	cytoplasm|mitochondrion|cytosol|chloroplast|chloroplast thylakoid membrane|chloroplast stroma|defense response, incompatible interaction|chloroplast envelope|regulation of plant-type hypersensitive response|chlorophyll catabolic process|regulation of programmed cell death|red chlorophyll catabolite reductase activity	ko00860	Porphyrin and chlorophyll metabolism
LOC18769446	46.131	76.0071	16.255	0.213862	-2.22525	1.19222e-06	2.20311e-05	Down	2.41421	3.20986	3.18841	0.238965	1.05042	0.529567	GeneID:18769446	18 kDa seed maturation protein	GO:0009793,GO:0031210,GO:0048030,GO:0070492	embryo development ending in seed dormancy|phosphatidylcholine binding|disaccharide binding|oligosaccharide binding
LOC18769456	654.848	935.634	374.062	0.399796	-1.32267	0.000170681	0.00174279	Down	26.9217	24.7617	14.6165	8.13566	8.32666	9.38753	GeneID:18769456	Thaumatin-like protein 1	GO:0006952,GO:0009617,GO:0009723	defense response|response to bacterium|response to ethylene
LOC18769457	121.769	51.7439	191.795	3.70662	1.8901	1.39055e-09	4.79227e-08	Up	1.76269	1.6273	1.20472	6.7935	4.07686	5.84453	GeneID:18769457	Squamosa promoter-binding-like protein 9	GO:0003677,GO:0003700,GO:0005634,GO:0005737,GO:0006355,GO:0046872,GO:0048366,GO:0048653,GO:2000025	DNA binding|DNA-binding transcription factor activity|nucleus|cytoplasm|regulation of transcription, DNA-templated|metal ion binding|leaf development|anther development|regulation of leaf formation
LOC18769458	10.5356	20.7316	0.339503	0.0163761	-5.93226	8.99123e-06	0.000135352	Down	1.00263	0.756172	1.09873	0.0474643	0	0	GeneID:18769458	Salicylic acid-binding protein 2	GO:0009862,GO:0016298,GO:0080031	systemic acquired resistance, salicylic acid mediated signaling pathway|lipase activity|methyl salicylate esterase activity
LOC18769478	742.516	1163.42	321.614	0.276439	-1.85497	1.90133e-20	2.58808e-18	Down	45.7886	42.1196	46.1003	14.8892	11.4496	10.0416	GeneID:18769478	E3 ubiquitin-protein ligase ATL4	GO:0004842,GO:0016021,GO:0016567,GO:0031625,GO:0046872	ubiquitin-protein transferase activity|integral component of membrane|protein ubiquitination|ubiquitin protein ligase binding|metal ion binding
LOC18769484	62.0063	27.8099	96.2026	3.45929	1.79048	1.26771e-05	0.00018396	Up	0.589973	0.521725	0.619581	2.69796	1.73603	1.46422	GeneID:18769484	DEAD-box ATP-dependent RNA helicase 52	GO:0003729,GO:0004386,GO:0005524	mRNA binding|helicase activity|ATP binding
LOC18769526	52.0288	103.039	1.01851	0.0098847	-6.66059	2.75628e-24	4.88771e-22	Down	2.24487	2.67574	1.5856	0.0648915	0	0	GeneID:18769526	Zinc-finger homeodomain protein 6	GO:0003677,GO:0005634,GO:0042803,GO:0046872	DNA binding|nucleus|protein homodimerization activity|metal ion binding
LOC18769529	157.616	285.264	29.969	0.105057	-3.25075	1.54171e-15	1.18724e-13	Down	9.36287	5.90537	7.94182	0.588139	0.574507	1.22357	GeneID:18769529
LOC18769539	666.883	918.387	415.38	0.452293	-1.14467	0.000856614	0.00689896	Down	25.7242	35.1204	20.276	11.7964	8.332	15.7138	GeneID:18769539
LOC18769545	376.769	201.249	552.289	2.74431	1.45644	0.00576198	0.0328729	Up	9.29875	2.8877	4.95346	9.30288	17.6012	18.9529	GeneID:18769545	3,9-dihydroxypterocarpan 6A-monooxygenase	GO:0005506,GO:0006952,GO:0016020,GO:0016709,GO:0020037	iron ion binding|defense response|membrane|oxidoreductase activity, acting on paired donors, with incorporation or reduction of molecular oxygen, NAD(P)H as one donor, and incorporation of one atom of oxygen|heme binding
LOC18769570	655.14	343.956	966.325	2.80945	1.49029	0.000201772	0.00200208	Up	11.084	9.25965	16.0361	28.2933	27.1389	44.8089	GeneID:18769570	Patatin-like protein 3	GO:0004620,GO:0005737,GO:0006952,GO:0009737,GO:0016042,GO:0047372	phospholipase activity|cytoplasm|defense response|response to abscisic acid|lipid catabolic process|acylglycerol lipase activity
LOC18769574	19.2071	31.092	7.32223	0.235502	-2.08619	0.00218737	0.015029	Down	0.43332	0.763706	0.744652	0.107228	0.314229	0.020368	GeneID:18769574	Wall-associated receptor kinase-like 20
LOC18769577	89.1971	49.1957	129.199	2.62622	1.39299	3.25357e-05	0.000418418	Up	0.818187	0.611231	0.843903	1.95669	1.70933	2.19076	GeneID:18769577	Kinesin-like protein NACK2	GO:0000919,GO:0003777,GO:0005524,GO:0005634,GO:0005874,GO:0007018,GO:0008017,GO:0009524	cell plate assembly|microtubule motor activity|ATP binding|nucleus|microtubule|microtubule-based movement|microtubule binding|phragmoplast
LOC18769581	281.168	153.786	408.55	2.65661	1.40959	0.00564552	0.0322942	Up	4.23384	4.90584	8.28972	9.37597	20.0727	15.6576	GeneID:18769581	Ethylene-responsive transcription factor ERN1	GO:0003700,GO:0005634,GO:0009877,GO:0043565,GO:0045893	DNA-binding transcription factor activity|nucleus|nodulation|sequence-specific DNA binding|positive regulation of transcription, DNA-templated
LOC18769664	1869.24	2543.37	1195.1	0.469888	-1.08961	1.09779e-09	3.8721e-08	Down	78.1104	84.7022	60.7739	33.7055	31.5696	37.3375	GeneID:18769664	Tubby-like F-box protein 5	GO:0005929,GO:0035091,GO:0061512	cilium|phosphatidylinositol binding|protein localization to cilium
LOC18769669	692.656	935.845	449.468	0.480281	-1.05805	8.74087e-07	1.65965e-05	Down	14.8621	11.8801	15.2505	8.32262	4.79638	6.74587	GeneID:18769669
LOC18769686	218.392	106.99	329.795	3.0825	1.6241	1.5158e-10	6.10392e-09	Up	2.96897	5.16981	2.84684	12.7901	9.16427	11.1462	GeneID:18769686	Uncharacterized solute carrier family 35 member C320.08	GO:0000139,GO:0005794,GO:0016021,GO:0022857,GO:0055085	Golgi membrane|Golgi apparatus|integral component of membrane|transmembrane transporter activity|transmembrane transport
LOC18769687	126.815	171.151	82.4803	0.481916	-1.05315	0.000362405	0.00330889	Down	3.95637	4.182	4.70227	1.96041	1.94017	2.15588	GeneID:18769687	Fe-S cluster assembly factor HCF101, chloroplastic	GO:0005524,GO:0009507,GO:0009570,GO:0016226,GO:0046872,GO:0051536,GO:0051539	ATP binding|chloroplast|chloroplast stroma|iron-sulfur cluster assembly|metal ion binding|iron-sulfur cluster binding|4 iron, 4 sulfur cluster binding
LOC18769697	4063.7	5650.97	2476.44	0.438232	-1.19023	3.51593e-10	1.32993e-08	Down	98.1151	100.486	73.9206	44.0351	31.461	41.4924	GeneID:18769697	EIN3-binding F-box protein 2	GO:0005634,GO:0006511,GO:0009723,GO:0009873,GO:0010105,GO:0016567,GO:0019005,GO:0031146	nucleus|ubiquitin-dependent protein catabolic process|response to ethylene|ethylene-activated signaling pathway|negative regulation of ethylene-activated signaling pathway|protein ubiquitination|SCF ubiquitin ligase complex|SCF-dependent proteasomal ubiquitin-dependent protein catabolic process	ko04075	Plant hormone signal transduction
LOC18769706	108.231	146.41	70.052	0.478464	-1.06352	0.000927994	0.00738156	Down	5.22526	4.15598	3.06736	2.53831	1.53899	1.77343	GeneID:18769706
LOC18769751	930.002	1335.49	524.514	0.392751	-1.34831	1.53386e-12	8.1675e-11	Down	57.4043	66.0756	47.8123	21.0248	22.428	22.1823	GeneID:18769751
LOC18769757	68.9262	128.513	9.3394	0.0726728	-3.78244	2.60452e-18	2.75097e-16	Down	3.45141	3.61689	2.44906	0.152349	0.372044	0.144693	GeneID:18769757	Aldehyde dehydrogenase family 3 member F1	GO:0004028,GO:0004029,GO:0005783,GO:0006081,GO:0016020,GO:0043878	3-chloroallyl aldehyde dehydrogenase activity|aldehyde dehydrogenase (NAD) activity|endoplasmic reticulum|cellular aldehyde metabolic process|membrane|glyceraldehyde-3-phosphate dehydrogenase (NAD+) (non-phosphorylating) activity	ko00561,ko00071,ko00380,ko00310,ko00040,ko00410,ko00340,ko00620,ko00330,ko00903,ko00280,ko00625,ko00053,ko00010	Glycerolipid metabolism|Fatty acid degradation|Tryptophan metabolism|Lysine degradation|Pentose and glucuronate interconversions|beta-Alanine metabolism|Histidine metabolism|Pyruvate metabolism|Arginine and proline metabolism|Limonene and pinene degradation|Valine, leucine and isoleucine degradation|Chloroalkane and chloroalkene degradation|Ascorbate and aldarate metabolism|Glycolysis / Gluconeog…
LOC18769772	79.4629	40.0505	118.875	2.96814	1.56956	9.46203e-06	0.000141557	Up	0.970304	0.87756	0.94952	2.49713	2.79107	2.82774	GeneID:18769772	B3 domain-containing transcription factor VRN1	GO:0003677,GO:0005654,GO:0009909,GO:0010048,GO:0043565	DNA binding|nucleoplasm|regulation of flower development|vernalization response|sequence-specific DNA binding
LOC18769815	247.525	334.879	160.172	0.478299	-1.06402	8.17176e-06	0.00012447	Down	18.543	22.6392	15.8152	7.35236	11.0579	8.09129	GeneID:18769815	Thioredoxin-like 3-1, chloroplastic	GO:0006662,GO:0009570,GO:0015035,GO:0045454	glycerol ether metabolic process|chloroplast stroma|protein disulfide oxidoreductase activity|cell redox homeostasis
LOC18769836	195.811	121.536	270.086	2.22227	1.15204	7.77456e-06	0.000118982	Up	4.68101	5.35414	4.51948	11.3033	10.8004	9.52511	GeneID:18769836	Adenylyl-sulfate kinase 3	GO:0000103,GO:0004020,GO:0005524,GO:0005829,GO:0019344,GO:0070814	sulfate assimilation|adenylylsulfate kinase activity|ATP binding|cytosol|cysteine biosynthetic process|hydrogen sulfide biosynthetic process	ko00230,ko00920	Purine metabolism|Sulfur metabolism
LOC18769840	182.2	305.544	58.8563	0.192628	-2.37611	9.36798e-18	9.23845e-16	Down	11.059	11.3183	9.89991	2.03105	1.91312	2.13567	GeneID:18769840	Replication factor C subunit 3	GO:0003677,GO:0005524,GO:0005634,GO:0005663,GO:0006261	DNA binding|ATP binding|nucleus|DNA replication factor C complex|DNA-dependent DNA replication	ko03430,ko03030,ko03420	Mismatch repair|DNA replication|Nucleotide excision repair
LOC18769855	42.7949	63.4143	22.1754	0.349691	-1.51585	0.00108277	0.00840176	Down	2.55622	2.17357	3.80304	0.881361	0.770309	1.27764	GeneID:18769855
LOC18769861	1373.9	912.571	1835.24	2.01106	1.00796	3.4055e-08	9.15217e-07	Up	38.6899	33.5286	39.3338	80.9307	72.4841	66.5621	GeneID:18769861	Dihydrofolate reductase	GO:0004146,GO:0005524,GO:0005739,GO:0005829,GO:0006730,GO:0046452,GO:0046654,GO:0046655,GO:0050661	dihydrofolate reductase activity|ATP binding|mitochondrion|cytosol|one-carbon metabolic process|dihydrofolate metabolic process|tetrahydrofolate biosynthetic process|folic acid metabolic process|NADP binding
LOC18769878	106.567	22.059	191.076	8.66203	3.11471	7.24425e-17	6.45273e-15	Up	0.996692	0.915294	0.418684	6.47509	7.87977	5.29081	GeneID:18769878	Auxin-induced in root cultures protein 12	GO:0005886,GO:0009734,GO:0031225,GO:0046872,GO:0055114	plasma membrane|auxin-activated signaling pathway|anchored component of membrane|metal ion binding|oxidation-reduction process
LOC18769885	34.5211	0	69.0422	Inf	Inf	6.95768e-20	8.67645e-18	Up	0	0	0	5.42574	4.45506	5.60119	GeneID:18769885	Phosphoserine aminotransferase 1, chloroplastic	GO:0004648,GO:0006564,GO:0009507,GO:0009536,GO:0009570,GO:0009735	O-phospho-L-serine:2-oxoglutarate aminotransferase activity|L-serine biosynthetic process|chloroplast|plastid|chloroplast stroma|response to cytokinin	ko00260,ko01200,ko00680,ko00750,ko01230	Glycine, serine and threonine metabolism|Carbon metabolism|Methane metabolism|Vitamin B6 metabolism|Biosynthesis of amino acids
LOC18769931	68.4156	110.748	26.0832	0.235518	-2.08609	5.76021e-05	0.000685586	Down	2.93904	3.74863	1.66772	0.567752	0.731055	0.612753	GeneID:18769931
LOC18769939	3773.34	5750.75	1795.93	0.312296	-1.67902	4.83501e-12	2.44649e-10	Down	171.724	160.815	215.152	68.444	55.8428	43.8034	GeneID:18769939	Probable vacuolar amino acid transporter YPQ1	GO:0015174,GO:0034488,GO:0071627	basic amino acid transmembrane transporter activity|basic amino acid transmembrane export from vacuole|integral component of fungal-type vacuolar membrane
LOC18769942	397.545	580.094	214.996	0.370622	-1.43198	4.78184e-11	2.09114e-09	Down	17.8953	18.5885	17.3784	6.02715	7.66304	5.78486	GeneID:18769942	Ubiquitin-conjugating enzyme E2 32	GO:0004842,GO:0005524,GO:0005783,GO:0006511,GO:0016020,GO:0016021,GO:0048471,GO:0061631	ubiquitin-protein transferase activity|ATP binding|endoplasmic reticulum|ubiquitin-dependent protein catabolic process|membrane|integral component of membrane|perinuclear region of cytoplasm|ubiquitin conjugating enzyme activity	ko04120,ko04141	Ubiquitin mediated proteolysis|Protein processing in endoplasmic reticulum
LOC18769945	162.917	89.5408	236.293	2.63894	1.39996	3.14374e-07	6.66287e-06	Up	3.73716	3.30964	2.96204	8.90587	7.72452	9.22397	GeneID:18769945	WD repeat-containing protein LWD1	GO:0005634,GO:0009718,GO:0043153,GO:0044212,GO:0048511,GO:0048573	nucleus|anthocyanin-containing compound biosynthetic process|entrainment of circadian clock by photoperiod|transcription regulatory region DNA binding|rhythmic process|photoperiodism, flowering
LOC18769954	302.21	97.1008	507.319	5.22466	2.38534	2.16155e-12	1.13534e-10	Up	1.81066	1.75327	2.11496	8.81124	11.8887	8.27294	GeneID:18769954	Probable disease resistance protein At5g66900
LOC18769970	76.5728	147.374	5.77155	0.0391626	-4.67438	1.09859e-08	3.25684e-07	Down	12.7026	6.10952	7.28707	1.03578	0	0	GeneID:18769970	60S ribosomal protein L15-2	GO:0003735,GO:0005840,GO:0006412	structural constituent of ribosome|ribosome|translation	ko03010	Ribosome
LOC18769994	203.759	274.599	132.919	0.484047	-1.04678	3.72145e-05	0.000470143	Down	4.75096	4.45334	4.80334	2.03409	2.27814	2.31492	GeneID:18769994	Putative leucine-rich repeat receptor-like serine/threonine-protein kinase At2g24130
LOC18770011	3112.29	1695.04	4529.55	2.67225	1.41805	0.000469398	0.00411474	Up	41.0112	49.6298	64.9085	90.4438	163.431	150.983	GeneID:18770011	Mitogen-activated protein kinase kinase kinase 17	GO:0004674,GO:0004709,GO:0005524,GO:0005634,GO:0005737,GO:0006970,GO:0009737,GO:0009738,GO:0023014,GO:0031098,GO:0032147	protein serine/threonine kinase activity|MAP kinase kinase kinase activity|ATP binding|nucleus|cytoplasm|response to osmotic stress|response to abscisic acid|abscisic acid-activated signaling pathway|signal transduction by protein phosphorylation|stress-activated protein kinase signaling cascade|activation of protein kinase activity
LOC18770013	1265.25	298.063	2232.43	7.48981	2.90493	2.57127e-06	4.3866e-05	Up	7.02592	10.0747	8.07723	41.8427	84.6895	56.3626	GeneID:18770013	Cytochrome P450 93A3	GO:0005506,GO:0016020,GO:0016021,GO:0016709,GO:0020037	iron ion binding|membrane|integral component of membrane|oxidoreductase activity, acting on paired donors, with incorporation or reduction of molecular oxygen, NAD(P)H as one donor, and incorporation of one atom of oxygen|heme binding
LOC18770018	4.76398	0	9.52797	Inf	Inf	0.00193606	0.0136826	Up	0	0	0	0.381574	0.155304	0.3322	GeneID:18770018	B3 domain-containing transcription factor VRN1	GO:0003677,GO:0005654,GO:0009909,GO:0010048,GO:0043565	DNA binding|nucleoplasm|regulation of flower development|vernalization response|sequence-specific DNA binding
LOC18770035	38.9097	62.6774	15.142	0.241586	-2.04939	0.00429815	0.0259217	Down	1.80147	1.34579	3.20942	0.17513	0.718499	0.598787	GeneID:18770035	1-aminocyclopropane-1-carboxylate oxidase homolog	GO:0009693,GO:0009835,GO:0031418,GO:0046872,GO:0051213	ethylene biosynthetic process|fruit ripening|L-ascorbic acid binding|metal ion binding|dioxygenase activity
LOC18770040	104.105	202.729	5.48052	0.0270337	-5.2091	2.02757e-14	1.37512e-12	Down	20.2097	24.2656	11.7097	1.04332	0.370595	0.090081	GeneID:18770040	Mitogen-activated protein kinase kinase kinase 1	GO:0000165,GO:0003677,GO:0004674,GO:0004709,GO:0005524,GO:0005634,GO:0005737,GO:0005768,GO:0005886,GO:0006970,GO:0009409,GO:0009611,GO:0009631,GO:0009651,GO:0010449,GO:0019900,GO:0022622,GO:0023014,GO:0031098,GO:0032147,GO:0045087,GO:0046777,GO:1902065	MAPK cascade|DNA binding|protein serine/threonine kinase activity|MAP kinase kinase kinase activity|ATP binding|nucleus|cytoplasm|endosome|plasma membrane|response to osmotic stress|response to cold|response to wounding|cold acclimation|response to salt stress|root meristem growth|kinase binding|root system development|signal transduction by protein phosphorylation|stress-activated protein kinase…
LOC18770055	481.722	154.98	808.465	5.21659	2.38311	1.4525e-13	8.85659e-12	Up	3.21312	5.03494	3.06103	19.7664	22.6036	15.0945	GeneID:18770055	Cyclic nucleotide-gated ion channel 1	GO:0005216,GO:0005516,GO:0005886,GO:0016021,GO:0030552,GO:0030553	ion channel activity|calmodulin binding|plasma membrane|integral component of membrane|cAMP binding|cGMP binding
LOC18770056	36.0295	13.2261	58.8329	4.44823	2.15323	2.37299e-05	0.000316917	Up	0.124109	0.759819	0.423595	2.12831	1.68299	1.86094	GeneID:18770056	Cytochrome P450 93A3	GO:0005506,GO:0016020,GO:0016021,GO:0016709,GO:0020037	iron ion binding|membrane|integral component of membrane|oxidoreductase activity, acting on paired donors, with incorporation or reduction of molecular oxygen, NAD(P)H as one donor, and incorporation of one atom of oxygen|heme binding	ko00980,ko00140,ko00380,ko00830	Metabolism of xenobiotics by cytochrome P450|Steroid hormone biosynthesis|Tryptophan metabolism|Retinol metabolism
LOC18770065	3199.67	1807.85	4591.49	2.53975	1.34468	8.77703e-08	2.15567e-06	Up	61.5727	61.6765	84.7146	139.587	182.73	193.8	GeneID:18770065	Peroxidase 44	GO:0004601,GO:0005576,GO:0006979,GO:0009505,GO:0009506,GO:0020037,GO:0042744,GO:0046872	peroxidase activity|extracellular region|response to oxidative stress|plant-type cell wall|plasmodesma|heme binding|hydrogen peroxide catabolic process|metal ion binding	ko00940	Phenylpropanoid biosynthesis
LOC18770068	199.307	31.0027	367.612	11.8574	3.56772	4.9478e-12	2.49702e-10	Up	1.3205	0.0883536	0.704749	5.98679	10.2225	8.32745	GeneID:18770068	Cytochrome P450 76A2	GO:0004497,GO:0005506,GO:0016705,GO:0020037	monooxygenase activity|iron ion binding|oxidoreductase activity, acting on paired donors, with incorporation or reduction of molecular oxygen|heme binding
LOC18770074	117.072	2.97057	231.174	77.8215	6.2821	2.4488e-45	1.15446e-42	Up	0.0476265	0.0242983	0.15005	4.74485	5.87591	6.40256	GeneID:18770074	Amino acid transporter AVT1A	GO:0003333,GO:0005774,GO:0015171,GO:0016021	amino acid transmembrane transport|vacuolar membrane|amino acid transmembrane transporter activity|integral component of membrane
LOC18770078	136.702	202.735	70.6692	0.348578	-1.52044	1.57587e-07	3.66545e-06	Down	2.66834	2.7108	2.11698	0.748532	0.954255	0.843461	GeneID:18770078	B3 domain-containing transcription factor VRN1	GO:0003677,GO:0005654,GO:0009909,GO:0010048,GO:0043565	DNA binding|nucleoplasm|regulation of flower development|vernalization response|sequence-specific DNA binding
LOC18770084	89.9183	18.9173	160.919	8.50647	3.08856	4.38919e-17	4.03993e-15	Up	0.518144	0.691374	1.17201	6.55295	7.33368	5.97636	GeneID:18770084	B3 domain-containing protein Os01g0723500	GO:0003677,GO:0005634	DNA binding|nucleus
LOC18770097	479.787	210.699	748.874	3.55424	1.82954	1.20781e-06	2.22752e-05	Up	6.24823	6.12384	5.92864	18.4103	27.2523	17.7119	GeneID:18770097	Nuclear transcription factor Y subunit A-10	GO:0003677,GO:0003700,GO:0016602	DNA binding|DNA-binding transcription factor activity|CCAAT-binding factor complex
LOC18770113	46.367	19.0858	73.6483	3.8588	1.94815	4.91093e-05	0.000595504	Up	0.252231	0.308842	0.953599	2.44422	1.28768	2.06057	GeneID:18770113	UPF0481 protein At3g47200	GO:0005886,GO:0016021	plasma membrane|integral component of membrane
LOC18770115	246.88	94.6947	399.066	4.21424	2.07527	7.75702e-14	4.96475e-12	Up	2.13961	2.52931	3.15126	8.72193	11.295	12.1691	GeneID:18770115	Glutamate dehydrogenase 1	GO:0004353,GO:0005507,GO:0005524,GO:0005739,GO:0006520,GO:0006807,GO:0008270,GO:0009646,GO:0009651,GO:0046686,GO:0050897	glutamate dehydrogenase [NAD(P)+] activity|copper ion binding|ATP binding|mitochondrion|cellular amino acid metabolic process|nitrogen compound metabolic process|zinc ion binding|response to absence of light|response to salt stress|response to cadmium ion|cobalt ion binding	ko00910,ko00471,ko01200,ko00250,ko00220	Nitrogen metabolism|D-Glutamine and D-glutamate metabolism|Carbon metabolism|Alanine, aspartate and glutamate metabolism|Arginine biosynthesis
LOC18770124	163.481	224.14	102.821	0.458733	-1.12427	3.40169e-05	0.000435806	Down	7.42913	7.16813	7.47551	2.40299	3.63665	3.82516	GeneID:18770124	Probable E3 ubiquitin-protein ligase BAH1-like 1	GO:0016567,GO:0016740,GO:0046872	protein ubiquitination|transferase activity|metal ion binding
LOC18770127	909.006	426.807	1391.2	3.25956	1.70468	7.98352e-06	0.000121794	Up	20.309	13.0588	33.108	65.3696	56.6545	91.1599	GeneID:18770127	Ethylene-responsive transcription factor 2	GO:0003677,GO:0003700,GO:0005634,GO:0006952,GO:0009873	DNA binding|DNA-binding transcription factor activity|nucleus|defense response|ethylene-activated signaling pathway
LOC18770140	11.1034	1.57908	20.6277	13.0631	3.70742	0.000297253	0.00278642	Up	0	0.156004	0	0.432819	0.845574	0.664035	GeneID:18770140
LOC18770153	3232.41	5564.69	900.136	0.161758	-2.62809	0.000770639	0.00632245	Down	217.841	147.691	384.101	45.8457	40.2366	33.419	GeneID:18770153	Salicylic acid-binding protein 2	GO:0009862,GO:0016298,GO:0080031	systemic acquired resistance, salicylic acid mediated signaling pathway|lipase activity|methyl salicylate esterase activity
LOC18770165	5.10623	0.337042	9.87541	29.3002	4.87284	0.00536316	0.0309539	Up	0	0	0.0581251	0.903947	0.294332	0.515114	GeneID:18770165	Anthocyanin regulatory C1 protein	GO:0005634,GO:0030154,GO:0043565,GO:0044212	nucleus|cell differentiation|sequence-specific DNA binding|transcription regulatory region DNA binding
LOC18770183	1799.41	2501.31	1097.52	0.438777	-1.18844	2.87559e-07	6.14168e-06	Down	159.752	130.323	106.958	61.3042	56.104	53.0482	GeneID:18770183	Chaperone protein dnaJ 11, chloroplastic	GO:0005634,GO:0009507,GO:0009536,GO:0009570	nucleus|chloroplast|plastid|chloroplast stroma
LOC18770192	101.127	183.745	18.5096	0.100735	-3.31136	6.06535e-10	2.22461e-08	Down	2.23956	1.41305	2.62464	0.24738	0.207125	0.167821	GeneID:18770192	Glutamate receptor 3.3	GO:0004970,GO:0005262,GO:0005622,GO:0005886,GO:0006816,GO:0007267,GO:0008066,GO:0009611,GO:0009630,GO:0009864,GO:0016021,GO:0019722,GO:0045087,GO:0050832,GO:0071230	ionotropic glutamate receptor activity|calcium channel activity|intracellular|plasma membrane|calcium ion transport|cell-cell signaling|glutamate receptor activity|response to wounding|gravitropism|induced systemic resistance, jasmonic acid mediated signaling pathway|integral component of membrane|calcium-mediated signaling|innate immune response|defense response to fungus|cellular response to am…
LOC18770195	41.5158	17.7766	65.2549	3.67082	1.8761	6.5824e-05	0.000769234	Up	0.145633	0.520097	0.363235	0.971221	1.1036	1.60011	GeneID:18770195	Receptor-like protein 46	GO:0005886,GO:0016021	plasma membrane|integral component of membrane
LOC18770203	285.24	438.899	131.582	0.2998	-1.73793	5.704e-09	1.77827e-07	Down	15.7856	14.4612	9.89224	4.26553	3.33946	4.17034	GeneID:18770203
LOC18770210	84.7057	56.3559	113.056	2.0061	1.00439	0.00308658	0.0198736	Up	2.6958	2.79507	2.28313	6.0598	4.02331	5.21574	GeneID:18770210	1-aminocyclopropane-1-carboxylate oxidase 1	GO:0006952,GO:0009693,GO:0009815,GO:0031418,GO:0046872,GO:0051213,GO:0051365,GO:0071281,GO:0071398,GO:0071732	defense response|ethylene biosynthetic process|1-aminocyclopropane-1-carboxylate oxidase activity|L-ascorbic acid binding|metal ion binding|dioxygenase activity|cellular response to potassium ion starvation|cellular response to iron ion|cellular response to fatty acid|cellular response to nitric oxide	ko00270	Cysteine and methionine metabolism
LOC18770228	11.154	0	22.3081	Inf	Inf	3.65719e-07	7.65871e-06	Up	0	0	0	0.759647	1.03061	0.881802	GeneID:18770228
LOC18770259	420.639	601.412	239.865	0.398837	-1.32613	7.59125e-05	0.000870128	Down	7.74327	10.8128	13.2143	3.72489	3.99354	4.67668	GeneID:18770259	Protein ENHANCED DISEASE RESISTANCE 2-like	GO:0005789,GO:0005886,GO:0006952,GO:0008289,GO:0010008,GO:0016021	endoplasmic reticulum membrane|plasma membrane|defense response|lipid binding|endosome membrane|integral component of membrane
LOC18770301	191.437	275.877	106.997	0.387843	-1.36645	1.65845e-07	3.83448e-06	Down	7.11469	7.58959	7.05373	3.22322	2.32831	2.72683	GeneID:18770301
LOC18770317	8.09414	0	16.1883	Inf	Inf	2.21244e-05	0.000299051	Up	0	0	0	0.523729	0.716226	0.364768	GeneID:18770317	B3 domain-containing transcription factor VRN1	GO:0003677,GO:0005654,GO:0009909,GO:0010048,GO:0043565	DNA binding|nucleoplasm|regulation of flower development|vernalization response|sequence-specific DNA binding
LOC18770318	30.5587	50.0201	11.0973	0.221857	-2.1723	7.46633e-05	0.000859028	Down	2.21742	1.37127	1.72889	0.329231	0.678934	0.138972	GeneID:18770318	Glycerate dehydrogenase	GO:0005777,GO:0008465,GO:0009854,GO:0051287	peroxisome|glycerate dehydrogenase activity|oxidative photosynthetic carbon pathway|NAD binding	ko00260,ko01200,ko00630	Glycine, serine and threonine metabolism|Carbon metabolism|Glyoxylate and dicarboxylate metabolism
LOC18770328	16.5008	5.3706	27.6309	5.14485	2.36313	0.00175945	0.0126708	Up	0.0923889	0.30638	0	0.704159	0.491313	0.788199	GeneID:18770328	UPF0481 protein At3g47200	GO:0005886,GO:0016021	plasma membrane|integral component of membrane
LOC18770344	188.734	258.079	119.389	0.462608	-1.11214	2.13733e-05	0.000291138	Down	14.2995	14.0381	15.9273	6.42832	5.12716	8.51381	GeneID:18770344	Germin-like protein subfamily 3 member 2	GO:0005618,GO:0030145,GO:0045735,GO:0048046	cell wall|manganese ion binding|nutrient reservoir activity|apoplast
LOC18770358	22.3252	42.2516	2.39877	0.0567734	-4.13864	0.00173392	0.0125056	Down	2.57051	0.403518	2.2842	0.172234	0.0841211	0.0408948	GeneID:18770358	Polygalacturonase	GO:0004650,GO:0005576,GO:0005618,GO:0005975,GO:0009835,GO:0071555	polygalacturonase activity|extracellular region|cell wall|carbohydrate metabolic process|fruit ripening|cell wall organization	ko00040,ko00500	Pentose and glucuronate interconversions|Starch and sucrose metabolism
LOC18770365	509.756	298.137	721.375	2.41961	1.27478	8.21769e-10	2.95791e-08	Up	8.74726	7.96262	7.39183	17.1878	18.444	21.3348	GeneID:18770365	Monogalactosyldiacylglycerol synthase 2, chloroplastic	GO:0006631,GO:0009247,GO:0009707,GO:0016036,GO:0019374,GO:0035250,GO:0046509	fatty acid metabolic process|glycolipid biosynthetic process|chloroplast outer membrane|cellular response to phosphate starvation|galactolipid metabolic process|UDP-galactosyltransferase activity|1,2-diacylglycerol 3-beta-galactosyltransferase activity	ko00561	Glycerolipid metabolism
LOC18770366	5979.2	3229.99	8728.42	2.70231	1.43419	3.76975e-15	2.78113e-13	Up	121.725	89.967	101.405	327.639	237.503	266.03	GeneID:18770366	Naringenin,2-oxoglutarate 3-dioxygenase	GO:0009813,GO:0031418,GO:0045486,GO:0046872	flavonoid biosynthetic process|L-ascorbic acid binding|naringenin 3-dioxygenase activity|metal ion binding	ko00941	Flavonoid biosynthesis
LOC18770393	24.7927	7.88021	41.7052	5.2924	2.40392	0.000355024	0.00324764	Up	0.445211	0.11357	0.818218	1.75722	3.43299	1.95667	GeneID:18770393	Sigma factor binding protein 1, chloroplastic	GO:0005634,GO:0009507,GO:0009816,GO:0051091,GO:0071482	nucleus|chloroplast|defense response to bacterium, incompatible interaction|positive regulation of DNA-binding transcription factor activity|cellular response to light stimulus
LOC18770454	105.203	50.8619	159.545	3.13683	1.64931	0.000375915	0.0034081	Up	2.36787	1.88654	0.987867	3.77896	6.93426	5.23265	GeneID:18770454	UPF0481 protein At3g47200	GO:0005886,GO:0016021	plasma membrane|integral component of membrane
LOC18770467	456.996	299.485	614.508	2.05188	1.03695	6.64753e-05	0.000775438	Up	8.70638	10.6967	8.73901	17.2503	22.9608	16.0466	GeneID:18770467	Transcription factor KUA1	GO:0000122,GO:0000976,GO:0003700,GO:0005634,GO:0006355,GO:0008270,GO:0009646,GO:0009651,GO:0009723,GO:0009733,GO:0009737,GO:0009739,GO:0009744,GO:0009751,GO:0009753,GO:0010150,GO:0010252,GO:0030307,GO:0045892,GO:0046686,GO:0048366,GO:0048527,GO:0090697,GO:2000469	negative regulation of transcription by RNA polymerase II|transcription regulatory region sequence-specific DNA binding|DNA-binding transcription factor activity|nucleus|regulation of transcription, DNA-templated|zinc ion binding|response to absence of light|response to salt stress|response to ethylene|response to auxin|response to abscisic acid|response to gibberellin|response to sucrose|respons…
LOC18770493	259.531	148.342	370.721	2.4991	1.32141	9.74394e-05	0.00107439	Up	5.85129	4.67425	7.51946	10.9396	15.1079	18.033	GeneID:18770493	Pathogen-associated molecular patterns-induced protein A70	GO:0009611,GO:0009617,GO:0009753,GO:0016021,GO:0042742	response to wounding|response to bacterium|response to jasmonic acid|integral component of membrane|defense response to bacterium
LOC18770505	476.658	943.667	9.64872	0.0102247	-6.6118	3.21705e-48	1.59442e-45	Down	33.8877	32.3734	22.4098	0.257798	0.409213	0.214238	GeneID:18770505	AP2/ERF and B3 domain-containing transcription factor At1g51120	GO:0003677,GO:0003700,GO:0005634,GO:0009873	DNA binding|DNA-binding transcription factor activity|nucleus|ethylene-activated signaling pathway
LOC18770509	31.2228	46.4686	15.977	0.343823	-1.54026	0.00388464	0.0239662	Down	0.341742	0.656381	0.485559	0.240766	0.0748318	0.187091	GeneID:18770509
LOC18770510	2745.64	3895.85	1595.43	0.40952	-1.28799	3.37833e-13	1.9848e-11	Down	102.968	121.775	115.75	38.9919	43.5126	53.6245	GeneID:18770510	Cytochrome P450 93A3	GO:0005506,GO:0016020,GO:0016021,GO:0016709,GO:0020037	iron ion binding|membrane|integral component of membrane|oxidoreductase activity, acting on paired donors, with incorporation or reduction of molecular oxygen, NAD(P)H as one donor, and incorporation of one atom of oxygen|heme binding
LOC18770511	21.6799	5.87832	37.4815	6.37622	2.6727	0.00040457	0.00363603	Up	0.14853	0.0757779	0.233976	0.485165	1.29012	1.07517	GeneID:18770511	Protein NRT1/ PTR FAMILY 6.2	GO:0009611,GO:0009753,GO:0015333,GO:0016021,GO:0035673,GO:0042128,GO:1904680	response to wounding|response to jasmonic acid|peptide:proton symporter activity|integral component of membrane|oligopeptide transmembrane transporter activity|nitrate assimilation|peptide transmembrane transporter activity
LOC18770528	409.433	190.552	628.315	3.29734	1.7213	3.11879e-15	2.34565e-13	Up	2.39276	2.54203	3.54754	9.56287	9.17656	8.68934	GeneID:18770528	MDIS1-interacting receptor like kinase 1
LOC18770545	27.8239	41.7301	13.9177	0.333517	-1.58417	0.00511473	0.0298217	Down	0.758152	1.29764	1.18146	0.505943	0.130057	0.429938	GeneID:18770545	Transcription factor bHLH48	GO:0003700,GO:0005634,GO:0006355,GO:0043565,GO:0046983	DNA-binding transcription factor activity|nucleus|regulation of transcription, DNA-templated|sequence-specific DNA binding|protein dimerization activity
LOC18770585	376.536	111.586	641.485	5.7488	2.52326	2.09971e-15	1.59785e-13	Up	2.55303	1.53346	2.30084	10.9219	10.3221	14.7545	GeneID:18770585	TMV resistance protein N	GO:0005524,GO:0005737,GO:0007165,GO:0009626,GO:0043531	ATP binding|cytoplasm|signal transduction|plant-type hypersensitive response|ADP binding
LOC18770586	1011.29	639.244	1383.34	2.16403	1.11372	3.21262e-09	1.05249e-07	Up	7.48576	9.18487	10.2492	17.0974	21.0709	18.7269	GeneID:18770586	TMV resistance protein N	GO:0005524,GO:0005737,GO:0007165,GO:0009626,GO:0043531	ATP binding|cytoplasm|signal transduction|plant-type hypersensitive response|ADP binding
LOC18770626	569.541	367.012	772.07	2.10366	1.0729	0.000484464	0.00422954	Up	11.4078	9.27173	12.1884	22.0989	28.1199	17.3879	GeneID:18770626	NAC transcription factor 47	GO:0003700,GO:0005634,GO:0009413,GO:0009793,GO:0010365,GO:0043565,GO:0045893	DNA-binding transcription factor activity|nucleus|response to flooding|embryo development ending in seed dormancy|positive regulation of ethylene biosynthetic process|sequence-specific DNA binding|positive regulation of transcription, DNA-templated
LOC18770656	1663.06	938.821	2387.3	2.54287	1.34646	5.85243e-05	0.000694851	Up	10.6708	11.049	14.3008	30.9078	21.3442	37.7059	GeneID:18770656	Putative ABC transporter B family member 8	GO:0005524,GO:0016021,GO:0042626	ATP binding|integral component of membrane|ATPase activity, coupled to transmembrane movement of substances	ko02010	ABC transporters
LOC18770725	540.604	869.491	211.718	0.243496	-2.03803	1.11437e-13	6.92591e-12	Down	42.1314	43.2007	28.9466	8.56179	9.28772	9.28709	GeneID:18770725
LOC18770757	26.1314	0	52.2628	Inf	Inf	1.84996e-12	9.7967e-11	Up	0	0	0	4.98289	4.48713	2.14441	GeneID:18770757	NDR1/HIN1-like protein 10	GO:0009506,GO:0009507,GO:0010150,GO:0016021,GO:0046658,GO:0051607,GO:0051707	plasmodesma|chloroplast|leaf senescence|integral component of membrane|anchored component of plasma membrane|defense response to virus|response to other organism
LOC18770760	1062.86	659.455	1466.27	2.22346	1.15281	5.93266e-08	1.50501e-06	Up	22.3661	18.4297	16.1645	50.9	36.2472	37.1582	GeneID:18770760	UDP-glycosyltransferase 73C6	GO:0008194,GO:0035251,GO:0043231,GO:0051555,GO:0080043,GO:0080044,GO:0080046	UDP-glycosyltransferase activity|UDP-glucosyltransferase activity|intracellular membrane-bounded organelle|flavonol biosynthetic process|quercetin 3-O-glucosyltransferase activity|quercetin 7-O-glucosyltransferase activity|quercetin 4'-O-glucosyltransferase activity
LOC18770787	11.7612	0.948314	22.5741	23.8045	4.57316	2.17248e-05	0.000295094	Up	0.111059	0.0566605	0	1.33015	1.1812	1.37815	GeneID:18770787	Universal stress protein A-like protein	GO:0005886,GO:0016208	plasma membrane|AMP binding
LOC18770816	92.2506	61.2153	123.286	2.01397	1.01004	0.00181184	0.0129913	Up	2.51178	4.31654	5.96984	9.71596	6.67869	8.95431	GeneID:18770816
LOC18770871	64.0628	99.4459	28.6796	0.288394	-1.79389	2.9268e-05	0.000379988	Down	0.77013	1.50522	1.15051	0.354307	0.253803	0.358936	GeneID:18770871	TMV resistance protein N	GO:0005524,GO:0005737,GO:0007165,GO:0009626,GO:0043531	ATP binding|cytoplasm|signal transduction|plant-type hypersensitive response|ADP binding
LOC18770883	209.258	124.599	293.916	2.35889	1.23811	1.04985e-06	1.95873e-05	Up	1.64225	2.92003	1.87835	5.3289	4.8941	4.60713	GeneID:18770883	Putative disease resistance protein RGA1	GO:0005524,GO:0006952,GO:0043531	ATP binding|defense response|ADP binding
LOC18770900	43.0351	60.358	25.7123	0.425996	-1.23109	0.0068973	0.0379823	Down	0.636144	0.63751	0.894734	0.321583	0.31413	0.270182	GeneID:18770900	MDIS1-interacting receptor like kinase 1
LOC18770905	30.4839	51.1201	9.84762	0.192637	-2.37604	0.00665222	0.0368743	Down	5.31417	2.92935	1.66784	0.532058	0.324829	1.01064	GeneID:18770905	Auxin-responsive protein SAUR41	GO:0005737,GO:0009734,GO:0009958,GO:0040008,GO:0060918,GO:0090057	cytoplasm|auxin-activated signaling pathway|positive gravitropism|regulation of growth|auxin transport|root radial pattern formation	ko04075	Plant hormone signal transduction
LOC18770931	21.9599	8.57466	35.3451	4.12204	2.04336	0.00122619	0.00930184	Up	0.143893	0.0734121	0.428157	0.783364	0.99477	0.843199	GeneID:18770931	Beta-glucosidase 12	GO:0005576,GO:0005975,GO:0008422,GO:0102483	extracellular region|carbohydrate metabolic process|beta-glucosidase activity|scopolin beta-glucosidase activity	ko00940,ko00460,ko00500	Phenylpropanoid biosynthesis|Cyanoamino acid metabolism|Starch and sucrose metabolism
LOC18770944	236.314	444.573	28.0546	0.0631047	-3.98611	5.85809e-44	2.63328e-41	Down	17.7896	21.4638	18.6824	1.4762	1.04872	1.06214	GeneID:18770944	Ubiquitin carboxyl-terminal hydrolase 5	GO:0004843,GO:0005634,GO:0006511,GO:0016579	thiol-dependent ubiquitin-specific protease activity|nucleus|ubiquitin-dependent protein catabolic process|protein deubiquitination
LOC18770965	1173.99	249.581	2098.39	8.40765	3.0717	4.92232e-36	1.58573e-33	Up	15.3913	3.45161	14.3875	80.3845	94.7563	99.3886	GeneID:18770965	Ubiquitin carboxyl-terminal hydrolase 12	GO:0004197,GO:0004843,GO:0005634,GO:0005737,GO:0005829,GO:0006511,GO:0009867,GO:0016579,GO:0031647	cysteine-type endopeptidase activity|thiol-dependent ubiquitin-specific protease activity|nucleus|cytoplasm|cytosol|ubiquitin-dependent protein catabolic process|jasmonic acid mediated signaling pathway|protein deubiquitination|regulation of protein stability
LOC18770976	518.49	302.366	734.615	2.42956	1.28069	5.95135e-10	2.19112e-08	Up	8.74029	6.1058	7.69445	16.3141	18.642	18.6126	GeneID:18770976	ACT domain-containing protein ACR10
LOC18770985	13.318	23.9097	2.72636	0.114028	-3.13255	0.000425617	0.00379365	Down	0.749976	1.10962	0.984516	0.0816583	0.0797657	0.15511	GeneID:18770985
LOC18770986	772.666	1108.72	436.612	0.393799	-1.34447	6.74173e-06	0.000105344	Down	38.0553	28.0853	44.3357	16.5466	12.8768	13.3676	GeneID:18770986	Probable feruloyl esterase A	GO:0005576,GO:0006629,GO:0030600,GO:0045493	extracellular region|lipid metabolic process|feruloyl esterase activity|xylan catabolic process
LOC18770987	32.2551	12.3471	52.1631	4.22471	2.07885	0.000841013	0.00679029	Up	0.926602	0.765385	0.0463382	3.31494	2.44032	1.41448	GeneID:18770987	Protein MIZU-KUSSEI 1	GO:0005737,GO:0005783,GO:0005789,GO:0009658,GO:0010274,GO:0016020,GO:0032541	cytoplasm|endoplasmic reticulum|endoplasmic reticulum membrane|chloroplast organization|hydrotropism|membrane|cortical endoplasmic reticulum
LOC18771055	829.881	438.195	1221.57	2.78773	1.47909	0.000841583	0.00679205	Up	30.2147	9.76471	34.2153	69.1915	46.8312	88.0643	GeneID:18771055	Ethylene-responsive transcription factor 1A	GO:0003677,GO:0003700,GO:0005634,GO:0006952,GO:0009873,GO:0010087,GO:0010200,GO:0051301	DNA binding|DNA-binding transcription factor activity|nucleus|defense response|ethylene-activated signaling pathway|phloem or xylem histogenesis|response to chitin|cell division
LOC18771058	20.3851	5.28784	35.4824	6.71019	2.74635	5.99024e-05	0.000707735	Up	0.0529579	0.0360244	0.203924	0.691935	0.488148	0.766692	GeneID:18771058	G-type lectin S-receptor-like serine/threonine-protein kinase At1g67520
LOC18771060	942.963	597.063	1288.86	2.15867	1.11014	6.40423e-06	0.000100886	Up	25.2654	28.73	25.3452	56.524	43.4047	67.7653	GeneID:18771060	FCS-Like Zinc finger 14	GO:0005634,GO:0005737,GO:0009744,GO:0009749,GO:0042594,GO:0046872,GO:1905582	nucleus|cytoplasm|response to sucrose|response to glucose|response to starvation|metal ion binding|response to mannose
LOC18771090	32.3809	63.0682	1.69355	0.0268526	-5.21879	1.3325e-12	7.1944e-11	Down	1.22774	2.23529	1.3652	0.104845	0	0.0248942	GeneID:18771090	Aspartic proteinase Asp1	GO:0004190,GO:0006508,GO:0030163	aspartic-type endopeptidase activity|proteolysis|protein catabolic process
LOC18771128	691.164	172.002	1210.33	7.03668	2.81489	9.92911e-14	6.24393e-12	Up	3.53123	5.26435	3.73252	33.7048	20.2176	32.4854	GeneID:18771128
LOC18771134	119.044	68.7386	169.35	2.46368	1.30082	1.74329e-05	0.000243645	Up	3.25675	4.66224	2.70552	9.63239	6.66912	9.29916	GeneID:18771134
LOC18771139	15371.9	6487.22	24256.6	3.73914	1.90271	1.3669e-05	0.000196876	Up	126.882	145.302	235.96	446.818	790.473	616.282	GeneID:18771139	Protein ALP1-like	GO:0004518,GO:0005634,GO:0046872	nuclease activity|nucleus|metal ion binding
LOC18771140	49.464	86.8544	12.0737	0.139011	-2.84673	1.03238e-06	1.92988e-05	Down	1.93315	2.7679	3.86386	0.33949	0.563756	0.257944	GeneID:18771140	Disease resistance-like protein DSC1	GO:0005524,GO:0007165,GO:0009626,GO:0042742,GO:0043531	ATP binding|signal transduction|plant-type hypersensitive response|defense response to bacterium|ADP binding
LOC18771150	104.293	0	208.586	Inf	Inf	1.07638e-50	5.77929e-48	Up	0	0	0	11.7865	12.844	10.5192	GeneID:18771150	Protein STRICTOSIDINE SYNTHASE-LIKE 7	GO:0005773,GO:0005783,GO:0009058,GO:0009611,GO:0009615,GO:0009620,GO:0009723,GO:0009751,GO:0009753,GO:0016020	vacuole|endoplasmic reticulum|biosynthetic process|response to wounding|response to virus|response to fungus|response to ethylene|response to salicylic acid|response to jasmonic acid|membrane
LOC18771160	52.1725	72.4149	31.9301	0.440933	-1.18137	0.0047915	0.028288	Down	2.49336	1.91495	1.74566	1.10927	0.399208	1.16443	GeneID:18771160	Flavonoid 3'-monooxygenase	GO:0004497,GO:0005506,GO:0005789,GO:0009813,GO:0016021,GO:0016705,GO:0020037	monooxygenase activity|iron ion binding|endoplasmic reticulum membrane|flavonoid biosynthetic process|integral component of membrane|oxidoreductase activity, acting on paired donors, with incorporation or reduction of molecular oxygen|heme binding
LOC18771164	151.303	56.6557	245.951	4.34115	2.11808	1.51328e-06	2.72602e-05	Up	3.03129	2.43577	1.35295	7.79745	12.4931	8.46357	GeneID:18771164	Auxin-induced in root cultures protein 12	GO:0005886,GO:0009734,GO:0031225,GO:0046872,GO:0055114	plasma membrane|auxin-activated signaling pathway|anchored component of membrane|metal ion binding|oxidation-reduction process
LOC18771166	395.717	153.613	637.821	4.15212	2.05385	4.86057e-20	6.18092e-18	Up	1.9697	5.39593	3.10282	14.1965	14.1863	13.9481	GeneID:18771166	Dynamin-related protein 4C	GO:0000266,GO:0003924,GO:0005525,GO:0005737,GO:0005874,GO:0008017,GO:0016020	mitochondrial fission|GTPase activity|GTP binding|cytoplasm|microtubule|microtubule binding|membrane
LOC18771179	1096.66	588.108	1605.22	2.72945	1.44861	0.00058007	0.00495675	Up	20.9993	21.4271	37.1753	47.2218	83.3666	81.4549	GeneID:18771179	Protein DA1-related 5	GO:0043130,GO:0043531,GO:0046872	ubiquitin binding|ADP binding|metal ion binding
LOC18771185	1945.42	2700.06	1190.78	0.441018	-1.18109	1.52008e-05	0.000216201	Down	53.4099	85.643	74.0642	36.1867	25.0029	30.9727	GeneID:18771185	L-ascorbate oxidase homolog	GO:0005507,GO:0005615,GO:0016491	copper ion binding|extracellular space|oxidoreductase activity
LOC18771188	7.67094	1.66398	13.6779	8.21996	3.03913	0.00875349	0.0457164	Up	0	0.0112728	0.0464089	0.156377	0.141002	0.171368	GeneID:18771188	Transposon Ty3-G Gag-Pol polyprotein	GO:0000943,GO:0003677,GO:0003723,GO:0003887,GO:0003964,GO:0004190,GO:0004523,GO:0004540,GO:0005524,GO:0005634,GO:0005737,GO:0006310,GO:0008233,GO:0008270,GO:0015074,GO:0032197	retrotransposon nucleocapsid|DNA binding|RNA binding|DNA-directed DNA polymerase activity|RNA-directed DNA polymerase activity|aspartic-type endopeptidase activity|RNA-DNA hybrid ribonuclease activity|ribonuclease activity|ATP binding|nucleus|cytoplasm|DNA recombination|peptidase activity|zinc ion binding|DNA integration|transposition, RNA-mediated
LOC18771211	4120.18	7284.76	955.594	0.131177	-2.93041	5.96182e-52	3.29246e-49	Down	377.75	315.418	341.063	70.0384	21.5496	42.6927	GeneID:18771211	Endochitinase	GO:0000272,GO:0004568,GO:0006032,GO:0006952,GO:0008061,GO:0016998	polysaccharide catabolic process|chitinase activity|chitin catabolic process|defense response|chitin binding|cell wall macromolecule catabolic process	ko00520	Amino sugar and nucleotide sugar metabolism
LOC18771218	246.553	14.0735	479.032	34.0379	5.08907	1.09047e-55	8.10683e-53	Up	0.698218	0.71244	0.325892	16.3449	20.3392	20.7783	GeneID:18771218	Caffeic acid 3-O-methyltransferase 1	GO:0009809,GO:0046983,GO:0047763	lignin biosynthetic process|protein dimerization activity|caffeate O-methyltransferase activity
LOC18771220	394.589	621.626	167.552	0.269539	-1.89144	1.72334e-16	1.49374e-14	Down	20.2143	26.4559	24.6086	4.44916	5.30755	8.97469	GeneID:18771220	Probable carboxylesterase 15	GO:0052689	carboxylic ester hydrolase activity
LOC18771227	197.873	116.074	279.672	2.40942	1.26869	7.84581e-07	1.51507e-05	Up	1.89882	2.59624	2.49263	6.32641	5.51333	4.65365	GeneID:18771227	Glucomannan 4-beta-mannosyltransferase 9	GO:0000139,GO:0009294,GO:0009617,GO:0016021,GO:0047259,GO:0051753,GO:0071555	Golgi membrane|DNA mediated transformation|response to bacterium|integral component of membrane|glucomannan 4-beta-mannosyltransferase activity|mannan synthase activity|cell wall organization
LOC18771233	180.044	251.467	108.621	0.431948	-1.21107	4.06901e-06	6.67656e-05	Down	4.18545	4.15369	3.10093	1.21733	1.73793	1.85281	GeneID:18771233
LOC18771236	373.008	508.86	237.157	0.466056	-1.10142	4.51643e-07	9.25748e-06	Down	21.9569	20.4642	17.7345	10.6343	9.1191	7.70987	GeneID:18771236	Transcription factor bHLH106	GO:0003677,GO:0003700,GO:0005634,GO:0006355,GO:0009941,GO:0042538,GO:0046983	DNA binding|DNA-binding transcription factor activity|nucleus|regulation of transcription, DNA-templated|chloroplast envelope|hyperosmotic salinity response|protein dimerization activity
LOC18771243	350.879	232.593	469.164	2.0171	1.01228	9.96901e-06	0.000147996	Up	4.84129	6.26891	6.99406	11.6128	13.9313	10.1398	GeneID:18771243	Protein LYK5	GO:0004672,GO:0005524,GO:0005886,GO:0008061,GO:0016021,GO:0042803,GO:0045087,GO:0071323	protein kinase activity|ATP binding|plasma membrane|chitin binding|integral component of membrane|protein homodimerization activity|innate immune response|cellular response to chitin
LOC18771266	37.7989	0.948746	74.649	78.6818	6.29796	3.28866e-18	3.41476e-16	Up	0.241038	0	0	7.52344	5.81089	5.31749	GeneID:18771266	Thioredoxin H-type	GO:0005737,GO:0006662,GO:0015035,GO:0045454	cytoplasm|glycerol ether metabolic process|protein disulfide oxidoreductase activity|cell redox homeostasis
LOC18771268	266.648	394.147	139.149	0.353039	-1.5021	2.01816e-05	0.000277447	Down	7.32098	12.9936	9.5416	4.07646	2.91674	3.3291	GeneID:18771268	Dehydration-responsive element-binding protein 3	GO:0003700,GO:0005634,GO:0009873,GO:0043565,GO:0045893	DNA-binding transcription factor activity|nucleus|ethylene-activated signaling pathway|sequence-specific DNA binding|positive regulation of transcription, DNA-templated
LOC18771270	34.6972	52.7572	16.6373	0.315356	-1.66494	0.00708786	0.0388767	Down	1.56511	0.912565	2.17197	0.456458	0.237802	0.751436	GeneID:18771270	Aluminum-activated malate transporter 8	GO:0009705,GO:0015743,GO:0016021	plant-type vacuole membrane|malate transport|integral component of membrane
LOC18771280	48.3275	19.4692	77.1858	3.96451	1.98714	0.00208756	0.0145041	Up	1.15119	0.516841	1.1606	5.11399	1.7631	4.23798	GeneID:18771280
LOC18771298	369.722	220.866	518.578	2.34794	1.23139	1.7846e-08	5.0802e-07	Up	2.66933	4.85278	5.62631	11.3186	9.81665	9.13636	GeneID:18771298	Probable disease resistance protein At5g66900
LOC18771304	14.758	0	29.5159	Inf	Inf	3.23167e-09	1.05694e-07	Up	0	0	0	0.814775	1.35301	1.23813	GeneID:18771304	Patatin-like protein 1	GO:0004620,GO:0005737,GO:0006952,GO:0010311,GO:0016042,GO:0047372	phospholipase activity|cytoplasm|defense response|lateral root formation|lipid catabolic process|acylglycerol lipase activity
LOC18771307	6.49487	0	12.9897	Inf	Inf	0.000185164	0.00186214	Up	0	0	0	1.10572	0.913926	1.13094	GeneID:18771307
LOC18771308	363.092	492.929	233.255	0.473201	-1.07948	8.8289e-07	1.67144e-05	Down	21.8816	20.4159	19.966	9.54735	10.4706	8.77907	GeneID:18771308	WUSCHEL-related homeobox 8	GO:0003677,GO:0005634,GO:0007275	DNA binding|nucleus|multicellular organism development
LOC18771318	265.88	174.677	357.084	2.04426	1.03158	8.494e-05	0.000953728	Up	4.6684	4.37229	3.45793	7.88235	10.0983	6.92654	GeneID:18771318	Glutathione hydrolase 3	GO:0000048,GO:0005773,GO:0005774,GO:0006520,GO:0006536,GO:0006749,GO:0006751,GO:0006805,GO:0009636,GO:0016021,GO:0016756,GO:0019344,GO:0036374,GO:0102953,GO:0103068	peptidyltransferase activity|vacuole|vacuolar membrane|cellular amino acid metabolic process|glutamate metabolic process|glutathione metabolic process|glutathione catabolic process|xenobiotic metabolic process|response to toxic substance|integral component of membrane|glutathione gamma-glutamylcysteinyltransferase activity|cysteine biosynthetic process|glutathione hydrolase activity|hypoglycin A …	ko00460,ko00480,ko00590,ko00430	Cyanoamino acid metabolism|Glutathione metabolism|Arachidonic acid metabolism|Taurine and hypotaurine metabolism
LOC18771324	87.039	57.7279	116.35	2.01549	1.01113	0.00252718	0.0169273	Up	1.85949	1.56253	1.57947	3.48356	2.50122	3.90234	GeneID:18771324
LOC18771335	21.0803	41.15	1.01057	0.0245582	-5.34765	1.00106e-09	3.55689e-08	Down	1.02421	0.542633	0.992869	0.0214456	0	0.0407359	GeneID:18771335	Probable sulfate transporter 3.5	GO:0008271,GO:0015116,GO:0015293,GO:0015301,GO:0016021	secondary active sulfate transmembrane transporter activity|sulfate transmembrane transporter activity|symporter activity|anion:anion antiporter activity|integral component of membrane
LOC18771338	82.9438	133.207	32.6803	0.245334	-2.02718	1.21167e-08	3.54853e-07	Down	10.4653	11.8649	10.4206	1.85692	3.46286	2.48508	GeneID:18771338
LOC18771340	647.264	407.154	887.373	2.17945	1.12397	1.6578e-08	4.7613e-07	Up	7.27995	7.10835	8.06596	13.9946	18.1715	15.6147	GeneID:18771340	UPF0496 protein At2g18630	GO:0005777,GO:0016021	peroxisome|integral component of membrane
LOC18771354	3740.43	5935.8	1545.06	0.260295	-1.94178	2.16678e-05	0.000294734	Down	117.543	185	96.1337	33.8055	39.4198	27.7414	GeneID:18771354
LOC18771366	11.6456	0.9899	22.3014	22.5289	4.4937	2.56066e-05	0.000340406	Up	0	0.0232918	0.0479447	0.29825	0.63123	0.63734	GeneID:18771366	Adenylate kinase 5, chloroplastic	GO:0004017,GO:0005524,GO:0009507,GO:0009534,GO:0009535,GO:0009941	adenylate kinase activity|ATP binding|chloroplast|chloroplast thylakoid|chloroplast thylakoid membrane|chloroplast envelope	ko00230	Purine metabolism
LOC18771373	246.682	342.841	150.523	0.439047	-1.18755	0.00595282	0.0338219	Down	12.3482	9.89703	18.1393	4.63055	4.88032	7.86986	GeneID:18771373	Bark storage protein A	GO:0003824,GO:0009116,GO:0045735	catalytic activity|nucleoside metabolic process|nutrient reservoir activity
LOC18771380	245.125	415.263	74.9874	0.180578	-2.46931	0.00620338	0.0348056	Down	10.1493	34.7805	18.4011	1.45952	3.15688	6.43582	GeneID:18771380	CEN-like protein 2	GO:0005737	cytoplasm
LOC18771383	5455.21	7279.82	3630.6	0.498721	-1.00369	3.40908e-07	7.18583e-06	Down	247.87	227.347	304.696	126.627	120.126	134.517	GeneID:18771383	Inositol oxygenase 4	GO:0005506,GO:0005737,GO:0019310,GO:0019853,GO:0050113	iron ion binding|cytoplasm|inositol catabolic process|L-ascorbic acid biosynthetic process|inositol oxygenase activity	ko00562,ko00053	Inositol phosphate metabolism|Ascorbate and aldarate metabolism
LOC18771446	786.136	347.837	1224.44	3.52014	1.81563	8.87124e-06	0.000133963	Up	17.8961	10.5885	19.8101	56.5416	38.8161	71.9339	GeneID:18771446	Ethylene-responsive transcription factor 13	GO:0003677,GO:0003700,GO:0005634,GO:0006952,GO:0009873,GO:0010200,GO:0043565	DNA binding|DNA-binding transcription factor activity|nucleus|defense response|ethylene-activated signaling pathway|response to chitin|sequence-specific DNA binding
LOC18771451	16.8934	6.38216	27.4046	4.29394	2.1023	0.00421027	0.0255031	Up	0.180037	0.44089	0.113443	1.33298	0.957415	0.781939	GeneID:18771451	Protein FD	GO:0003677,GO:0003700,GO:0005634,GO:0006355,GO:0009648,GO:0009909,GO:0009911,GO:0043621,GO:0045893,GO:2000028	DNA binding|DNA-binding transcription factor activity|nucleus|regulation of transcription, DNA-templated|photoperiodism|regulation of flower development|positive regulation of flower development|protein self-association|positive regulation of transcription, DNA-templated|regulation of photoperiodism, flowering
LOC18771454	969.367	1333.22	605.512	0.454171	-1.13869	0.00142057	0.0105771	Down	28.3702	50.8235	50.4404	23.3093	16.8974	17.5709	GeneID:18771454	AAA-ATPase At2g18193	GO:0005524,GO:0005783,GO:0016021,GO:0016887	ATP binding|endoplasmic reticulum|integral component of membrane|ATPase activity
LOC18771501	32.2728	8.40658	56.1389	6.67798	2.73941	7.18418e-05	0.000830521	Up	0.19321	0.138002	0.182616	1.57777	0.575383	1.23875	GeneID:18771501	Nitrate regulatory gene2 protein	GO:0005634,GO:0010167,GO:0015706,GO:0071249,GO:0071705,GO:1901698	nucleus|response to nitrate|nitrate transport|cellular response to nitrate|nitrogen compound transport|response to nitrogen compound
LOC18771538	59.3778	80.5805	38.1751	0.473751	-1.0778	0.00626738	0.0350933	Down	2.3014	2.59001	3.73196	1.03179	1.7278	1.22493	GeneID:18771538	Putative B3 domain-containing protein At4g03170	GO:0003677,GO:0005634	DNA binding|nucleus
LOC18771542	490.095	717.493	262.698	0.366133	-1.44956	6.35904e-12	3.14358e-10	Down	26.6953	32.4238	27.1987	11.065	6.93681	12.9793	GeneID:18771542	Two-component response regulator ORR10	GO:0000160,GO:0005634,GO:0009736	phosphorelay signal transduction system|nucleus|cytokinin-activated signaling pathway	ko04075	Plant hormone signal transduction
LOC18771558	78.0097	30.93	125.089	4.04428	2.01588	0.000933775	0.00742144	Up	1.70272	1.21618	1.25172	6.07165	2.89755	7.61536	GeneID:18771558	Anthocyanin regulatory C1 protein	GO:0005634,GO:0030154,GO:0043565,GO:0044212	nucleus|cell differentiation|sequence-specific DNA binding|transcription regulatory region DNA binding
LOC18771581	809.957	520.396	1099.52	2.11285	1.07919	2.26947e-08	6.31173e-07	Up	24.243	28.3872	25.0641	56.7899	50.9677	52.8653	GeneID:18771581	Werner Syndrome-like exonuclease	GO:0003677,GO:0005634,GO:0008408,GO:0046872	DNA binding|nucleus|3'-5' exonuclease activity|metal ion binding
LOC18771596	430.785	639.565	222.006	0.34712	-1.52649	2.48971e-10	9.68282e-09	Down	16.5816	18.2482	12.407	4.2287	6.15894	5.55535	GeneID:18771596	Beta-fructofuranosidase, insoluble isoenzyme 1	GO:0004564,GO:0005576,GO:0005618,GO:0005975	beta-fructofuranosidase activity|extracellular region|cell wall|carbohydrate metabolic process	ko00500,ko00052	Starch and sucrose metabolism|Galactose metabolism
LOC18771599	465.081	627.869	302.293	0.481458	-1.05452	4.78691e-07	9.77044e-06	Down	39.29	32.9387	29.6031	16.2094	14.419	17.3523	GeneID:18771599	Dirigent protein 2	GO:0048046	apoplast
LOC18771613	38.7345	57.2172	20.2519	0.353948	-1.49839	0.00218798	0.015029	Down	1.22919	1.49088	1.48573	0.328277	0.0986672	1.03128	GeneID:18771613	UPF0481 protein At3g47200	GO:0005886,GO:0016021	plasma membrane|integral component of membrane
LOC18771632	533.306	816.772	249.841	0.305889	-1.70892	1.42151e-07	3.3467e-06	Down	17.1387	12.1177	14.9122	2.9954	3.10772	7.10337	GeneID:18771632	Pyrophosphate-energized vacuolar membrane proton pump	GO:0004427,GO:0005774,GO:0009678,GO:0016021,GO:0046872,GO:1902600	inorganic diphosphatase activity|vacuolar membrane|hydrogen-translocating pyrophosphatase activity|integral component of membrane|metal ion binding|proton transmembrane transport
LOC18771636	18.8925	30.2087	7.57634	0.2508	-1.99539	0.00354676	0.0222655	Down	1.79518	2.58971	1.56022	0.404403	0.658384	0.384082	GeneID:18771636
LOC18771643	4396.14	7368.42	1423.85	0.193237	-2.37156	3.51982e-38	1.2599e-35	Down	331.947	268.403	277.549	64.8244	51.7216	49.8991	GeneID:18771643	Class V chitinase	GO:0000272,GO:0004568,GO:0005576,GO:0005618,GO:0006032,GO:0008061,GO:0008843,GO:0009651,GO:0009737,GO:0009753,GO:0035885	polysaccharide catabolic process|chitinase activity|extracellular region|cell wall|chitin catabolic process|chitin binding|endochitinase activity|response to salt stress|response to abscisic acid|response to jasmonic acid|exochitinase activity	ko00520	Amino sugar and nucleotide sugar metabolism
LOC18771644	4.9377	0	9.87541	Inf	Inf	0.001529	0.0112373	Up	0	0	0	0.33838	0.110179	0.192826	GeneID:18771644	G-type lectin S-receptor-like serine/threonine-protein kinase At1g67520
LOC18771660	1519.5	851.511	2187.48	2.56894	1.36118	1.19607e-08	3.51886e-07	Up	34.7544	43.3225	42.801	91.7254	119.942	91.238	GeneID:18771660
LOC18771678	404.799	597.448	212.15	0.355094	-1.49373	9.74195e-12	4.70755e-10	Down	11.2707	11.6799	14.0556	2.91877	4.76575	5.11928	GeneID:18771678	Beta-glucosidase C	GO:0005576,GO:0008422,GO:0009251,GO:0030245,GO:0102483	extracellular region|beta-glucosidase activity|glucan catabolic process|cellulose catabolic process|scopolin beta-glucosidase activity	ko00940,ko00460,ko00500	Phenylpropanoid biosynthesis|Cyanoamino acid metabolism|Starch and sucrose metabolism
LOC18771701	1728.65	2468.67	988.628	0.400471	-1.32023	3.43223e-07	7.22675e-06	Down	69.4258	53.605	78.8588	25.8825	29.4918	23.8062	GeneID:18771701	NADP-dependent alkenal double bond reductase P2	GO:0005829,GO:0005886,GO:0006979,GO:0032440	cytosol|plasma membrane|response to oxidative stress|2-alkenal reductase [NAD(P)] activity
LOC18771728	1872.6	377.058	3368.15	8.93271	3.1591	3.13852e-08	8.5203e-07	Up	9.98326	13.3318	31.3561	104.04	202.475	170.697	GeneID:18771728	Ethylene-responsive transcription factor ERF017	GO:0003677,GO:0003700,GO:0005634,GO:0009873	DNA binding|DNA-binding transcription factor activity|nucleus|ethylene-activated signaling pathway
LOC18771733	467.211	715.841	218.581	0.305348	-1.71147	1.37474e-15	1.06716e-13	Down	24.942	23.511	28.4388	7.64834	7.7959	7.54474	GeneID:18771733	Ubiquitin-conjugating enzyme E2 32	GO:0004842,GO:0005524,GO:0005783,GO:0006511,GO:0016020,GO:0016021,GO:0048471,GO:0061631	ubiquitin-protein transferase activity|ATP binding|endoplasmic reticulum|ubiquitin-dependent protein catabolic process|membrane|integral component of membrane|perinuclear region of cytoplasm|ubiquitin conjugating enzyme activity	ko04120,ko04141	Ubiquitin mediated proteolysis|Protein processing in endoplasmic reticulum
LOC18771773	590.645	951.786	229.505	0.241131	-2.05211	0.00831184	0.0439922	Down	43.2926	16.7613	58.0001	8.06355	10.5162	9.36926	GeneID:18771773	Salicylic acid-binding protein 2	GO:0009862,GO:0016298,GO:0080031	systemic acquired resistance, salicylic acid mediated signaling pathway|lipase activity|methyl salicylate esterase activity
LOC18771790	23.7178	5.77262	41.663	7.21735	2.85147	1.10726e-05	0.000162632	Up	0.1835	0.187237	0.110119	1.42712	0.864307	1.11143	GeneID:18771790	Asparagine--tRNA ligase, cytoplasmic 1	GO:0003677,GO:0004816,GO:0005524,GO:0005739,GO:0005829,GO:0006421,GO:0009507,GO:0009793,GO:0046686	DNA binding|asparagine-tRNA ligase activity|ATP binding|mitochondrion|cytosol|asparaginyl-tRNA aminoacylation|chloroplast|embryo development ending in seed dormancy|response to cadmium ion	ko00970	Aminoacyl-tRNA biosynthesis
LOC18771798	31.6929	6.19327	57.1926	9.23464	3.20706	1.99657e-06	3.50515e-05	Up	0.118523	0.181406	0.280061	1.87122	2.33209	1.0418	GeneID:18771798	Receptor-like protein kinase THESEUS 1
LOC18771804	442.898	650.982	234.814	0.360708	-1.4711	0.000463229	0.00407545	Down	28.2143	27.3025	44.3689	8.9358	9.96827	16.3709	GeneID:18771804	Senescence-associated protein DIN1
LOC18771858	18.1729	28.8588	7.48698	0.259435	-1.94655	0.00581197	0.033119	Down	0.359429	0.675592	0.695333	0.102987	0.1006	0.234748	GeneID:18771858
LOC18771908	66.4702	91.9607	40.9797	0.445621	-1.16611	0.0019884	0.0139607	Down	3.07734	3.04487	2.93797	1.15073	1.12406	1.6715	GeneID:18771908	Protein MULTIPOLAR SPINDLE 1	GO:0000212,GO:0005634,GO:0005737,GO:0005819,GO:0007059,GO:0007140,GO:0009553,GO:0009555,GO:0042138,GO:0048236,GO:0051026	meiotic spindle organization|nucleus|cytoplasm|spindle|chromosome segregation|male meiotic nuclear division|embryo sac development|pollen development|meiotic DNA double-strand break formation|plant-type sporogenesis|chiasma assembly
LOC18771913	126.963	175.024	78.903	0.450813	-1.1494	0.000282522	0.00266383	Down	3.28343	2.51273	1.92866	1.15128	0.947032	1.30924	GeneID:18771913	Probable LRR receptor-like serine/threonine-protein kinase At1g56140
LOC18771927	44.1671	63.9156	24.4186	0.382045	-1.38819	0.00197563	0.0139013	Down	1.83397	2.3788	2.08923	0.710743	0.991814	0.642883	GeneID:18771927	ATP-dependent RNA helicase DEAH11, chloroplastic	GO:0000398,GO:0003723,GO:0005524,GO:0009507,GO:0034459,GO:0046872	mRNA splicing, via spliceosome|RNA binding|ATP binding|chloroplast|ATP-dependent 3'-5' RNA helicase activity|metal ion binding
LOC18771938	289.806	497.757	81.8554	0.164449	-2.60429	1.11722e-09	3.93347e-08	Down	29.8187	29.8134	45.3263	4.06744	7.37875	5.38068	GeneID:18771938
LOC18771940	136.893	30.9937	242.792	7.8336	2.96967	1.13922e-07	2.72524e-06	Up	1.11242	0.709422	0.905387	4.36037	8.07493	8.36879	GeneID:18771940	Protein ALUMINUM SENSITIVE 3	GO:0005460,GO:0005886,GO:0005887,GO:0010044,GO:0012506	UDP-glucose transmembrane transporter activity|plasma membrane|integral component of plasma membrane|response to aluminum ion|vesicle membrane
LOC18771960	358.301	515.886	200.716	0.389071	-1.36189	1.50406e-06	2.71446e-05	Down	12.5115	11.2391	7.67806	3.92801	4.00024	4.00843	GeneID:18771960	Transcription factor MYB3R-1	GO:0005634,GO:0008285,GO:0032465,GO:0043565,GO:0045892,GO:0045893,GO:1901181	nucleus|negative regulation of cell proliferation|regulation of cytokinesis|sequence-specific DNA binding|negative regulation of transcription, DNA-templated|positive regulation of transcription, DNA-templated|negative regulation of cellular response to caffeine
LOC18771969	5587.47	3683.7	7491.25	2.03362	1.02405	1.48081e-05	0.000211236	Up	182.409	230.082	201.384	427.765	471.94	319.67	GeneID:18771969	Glutathione S-transferase U8	GO:0004364,GO:0005737,GO:0005829,GO:0006749,GO:0009407,GO:0046686	glutathione transferase activity|cytoplasm|cytosol|glutathione metabolic process|toxin catabolic process|response to cadmium ion	ko00982,ko00480,ko00980	Drug metabolism - cytochrome P450|Glutathione metabolism|Metabolism of xenobiotics by cytochrome P450
LOC18771981	430.941	620.714	241.169	0.388535	-1.36388	1.79616e-05	0.000250309	Down	20.2946	32.8845	21.792	10.5105	9.33725	8.60685	GeneID:18771981	Peroxidase 15	GO:0004601,GO:0005576,GO:0006979,GO:0020037,GO:0042744,GO:0046872	peroxidase activity|extracellular region|response to oxidative stress|heme binding|hydrogen peroxide catabolic process|metal ion binding	ko00940	Phenylpropanoid biosynthesis
LOC18772000	48.4139	73.309	23.5188	0.320817	-1.64018	0.000176495	0.00179174	Down	2.42952	3.6456	2.25127	0.58352	0.683995	1.33008	GeneID:18772000	GDSL esterase/lipase At1g71250	GO:0005576,GO:0016042,GO:0016298	extracellular region|lipid catabolic process|lipase activity
LOC18772001	17.7787	4.14979	31.4076	7.56847	2.92	0.000102475	0.00112096	Up	0.176189	0.314611	0.0925154	1.96633	1.03065	1.32093	GeneID:18772001	L-ascorbate peroxidase 2, cytosolic	GO:0000302,GO:0004601,GO:0005829,GO:0006979,GO:0009507,GO:0016688,GO:0020037,GO:0034599,GO:0042744,GO:0046872	response to reactive oxygen species|peroxidase activity|cytosol|response to oxidative stress|chloroplast|L-ascorbate peroxidase activity|heme binding|cellular response to oxidative stress|hydrogen peroxide catabolic process|metal ion binding	ko00480,ko00053	Glutathione metabolism|Ascorbate and aldarate metabolism
LOC18772036	4007.99	2510.42	5505.55	2.19308	1.13296	4.03479e-06	6.63167e-05	Up	45.3595	58.1288	61.1095	101.3	139.734	110.996	GeneID:18772036	Calmodulin-binding protein 60 B	GO:0003700,GO:0005516,GO:0005634,GO:0043565,GO:0080142	DNA-binding transcription factor activity|calmodulin binding|nucleus|sequence-specific DNA binding|regulation of salicylic acid biosynthetic process
LOC18772056	1410.06	2168.18	651.941	0.300686	-1.73367	1.6733e-20	2.29384e-18	Down	38.2839	41.0197	46.0529	11.4497	11.5144	13.9139	GeneID:18772056	O-fucosyltransferase 19
LOC18772071	1229.64	718.831	1740.46	2.42123	1.27574	1.54872e-07	3.61536e-06	Up	13.2959	12.9509	14.1682	26.2475	37.1183	32.0694	GeneID:18772071	Probable xyloglucan galactosyltransferase GT17	GO:0000139,GO:0006486,GO:0016021,GO:0016757	Golgi membrane|protein glycosylation|integral component of membrane|transferase activity, transferring glycosyl groups
LOC18772097	753.711	117.491	1389.93	11.8301	3.56439	1.4533e-60	1.33766e-57	Up	1.49338	1.69311	1.56832	19.6511	15.3945	20.0628	GeneID:18772097	TMV resistance protein N	GO:0005524,GO:0005737,GO:0007165,GO:0009626,GO:0043531	ATP binding|cytoplasm|signal transduction|plant-type hypersensitive response|ADP binding
LOC18772098	18.5014	35.3081	1.69475	0.0479988	-4.38086	2.14232e-07	4.74575e-06	Down	0.764898	0.878037	1.02921	0	0.0254227	0.0988725	GeneID:18772098	Alpha-aminoadipic semialdehyde synthase	GO:0004753,GO:0005737,GO:0019878,GO:0033512,GO:0047130,GO:0047131	saccharopine dehydrogenase activity|cytoplasm|lysine biosynthetic process via aminoadipic acid|L-lysine catabolic process to acetyl-CoA via saccharopine|saccharopine dehydrogenase (NADP+, L-lysine-forming) activity|saccharopine dehydrogenase (NAD+, L-glutamate-forming) activity
LOC18772104	55.1523	36.171	74.1336	2.04953	1.03529	0.00929612	0.0478649	Up	1.62379	1.96369	3.28424	5.76238	3.64595	4.47776	GeneID:18772104	Thioredoxin F-type, chloroplastic	GO:0006662,GO:0009507,GO:0015035,GO:0045454	glycerol ether metabolic process|chloroplast|protein disulfide oxidoreductase activity|cell redox homeostasis
LOC18772106	246.798	331.343	162.253	0.489683	-1.03008	1.92458e-05	0.000266095	Down	11.4117	9.75003	10.77	5.26829	4.88725	5.1609	GeneID:18772106
LOC18772110	738.582	1155.04	322.12	0.278882	-1.84227	2.68762e-20	3.60756e-18	Down	33.5996	32.481	33.4015	10.3594	10.7265	6.07199	GeneID:18772110	Fatty acyl-CoA reductase 3	GO:0005783,GO:0006629,GO:0010025,GO:0010345,GO:0035336,GO:0080019,GO:0102965	endoplasmic reticulum|lipid metabolic process|wax biosynthetic process|suberin biosynthetic process|long-chain fatty-acyl-CoA metabolic process|fatty-acyl-CoA reductase (alcohol-forming) activity|alcohol-forming fatty acyl-CoA reductase activity	ko00073,ko04146	Cutin, suberine and wax biosynthesis|Peroxisome
LOC18772115	48.1997	3.87513	92.5242	23.8764	4.57752	8.41177e-16	6.86039e-14	Up	0.0196811	0.140573	0.0826749	1.6286	2.40722	1.58747	GeneID:18772115	UDP-glycosyltransferase 86A1	GO:0008194,GO:0043231,GO:0080043,GO:0080044	UDP-glycosyltransferase activity|intracellular membrane-bounded organelle|quercetin 3-O-glucosyltransferase activity|quercetin 7-O-glucosyltransferase activity
LOC18772143	2052.93	1330.34	2775.52	2.08633	1.06097	0.00102821	0.00803323	Up	70.2625	67.7226	83.4539	106.394	167.023	176.969	GeneID:18772143	Zinc finger protein ZAT5	GO:0003700,GO:0005634,GO:0006355,GO:0043565,GO:0046872	DNA-binding transcription factor activity|nucleus|regulation of transcription, DNA-templated|sequence-specific DNA binding|metal ion binding
LOC18772146	1204.68	780.18	1629.19	2.08822	1.06227	1.00447e-08	2.9962e-07	Up	21.6404	16.6029	19.9073	37.4588	43.9037	37.3784	GeneID:18772146	Sulfoquinovosyl transferase SQD2	GO:0008194,GO:0009247,GO:0009507,GO:0009536,GO:0009941,GO:0016021,GO:0016036,GO:0031969,GO:0046506,GO:0046510	UDP-glycosyltransferase activity|glycolipid biosynthetic process|chloroplast|plastid|chloroplast envelope|integral component of membrane|cellular response to phosphate starvation|chloroplast membrane|sulfolipid biosynthetic process|UDP-sulfoquinovose:DAG sulfoquinovosyltransferase activity	ko00561	Glycerolipid metabolism
LOC18772165	2136.64	339.793	3933.49	11.5761	3.53308	7.09046e-08	1.76613e-06	Up	8.76561	9.5082	10.0625	72.5982	146.927	99.2196	GeneID:18772165	Taxadiene 5-alpha hydroxylase	GO:0004497,GO:0005506,GO:0016021,GO:0020037,GO:0042617,GO:0050604	monooxygenase activity|iron ion binding|integral component of membrane|heme binding|paclitaxel biosynthetic process|taxadiene 5-alpha-hydroxylase activity	ko00830	Retinol metabolism
LOC18772177	1642.92	2349.55	936.288	0.398496	-1.32736	0.00289749	0.0188634	Down	59.7517	38.5343	76.1103	31.9531	17.532	19.2346	GeneID:18772177	Probable L-cysteine desulfhydrase, chloroplastic	GO:0009507,GO:0016829	chloroplast|lyase activity
LOC18772183	51.122	12.682	89.562	7.06214	2.82011	1.79485e-06	3.18282e-05	Up	0.238693	0.292266	0.426142	1.79325	3.04642	1.75251	GeneID:18772183	UDP-glucose iridoid glucosyltransferase	GO:0035251,GO:1900994	UDP-glucosyltransferase activity|(-)-secologanin biosynthetic process
LOC18772233	47.7059	21.66	73.7517	3.40498	1.76765	0.000247731	0.00237756	Up	0.738163	0.205418	1.33899	1.79011	2.96194	2.87985	GeneID:18772233	Wall-associated receptor kinase-like 20
LOC18772245	581.267	824.382	338.152	0.410189	-1.28564	2.19236e-10	8.63057e-09	Down	21.512	21.265	19.8967	7.7553	9.66712	7.66319	GeneID:18772245	Root phototropism protein 2	GO:0005634,GO:0005737,GO:0007165,GO:0009638,GO:0016567	nucleus|cytoplasm|signal transduction|phototropism|protein ubiquitination
LOC18772246	267.93	357.413	178.446	0.499271	-1.0021	1.95264e-05	0.000269398	Down	20.411	20.099	21.6082	9.25991	12.6051	8.39742	GeneID:18772246
LOC18772268	294.091	191.109	397.073	2.07773	1.05501	5.11952e-06	8.26694e-05	Up	10.3777	9.66617	8.79878	15.6532	21.7205	21.0201	GeneID:18772268
LOC18772274	57.9104	78.2239	37.5969	0.480632	-1.05699	0.00803273	0.0427606	Down	2.14483	2.16116	2.33693	1.16766	0.883961	1.08126	GeneID:18772274	G-type lectin S-receptor-like serine/threonine-protein kinase SD2-5
LOC18772287	3473.83	1608.66	5339	3.31891	1.73071	8.05117e-17	7.13858e-15	Up	54.4877	59.3974	52.7623	153.297	195.883	190.048	GeneID:18772287	E3 ubiquitin-protein ligase ATL6	GO:0004842,GO:0005886,GO:0009814,GO:0009816,GO:0010200,GO:0016021,GO:0016567,GO:0046872	ubiquitin-protein transferase activity|plasma membrane|defense response, incompatible interaction|defense response to bacterium, incompatible interaction|response to chitin|integral component of membrane|protein ubiquitination|metal ion binding
LOC18772297	592.052	855.863	328.242	0.383522	-1.38262	1.08403e-11	5.18645e-10	Down	25.562	30.4245	26.5256	9.53111	9.43952	11.9438	GeneID:18772297	Protein SRG1	GO:0010150,GO:0016682,GO:0046872,GO:0051213	leaf senescence|oxidoreductase activity, acting on diphenols and related substances as donors, oxygen as acceptor|metal ion binding|dioxygenase activity
LOC18772304	20012	31816.3	8207.66	0.25797	-1.95472	3.53591e-20	4.61795e-18	Down	868.993	718.972	944.627	230.255	215.071	195.424	GeneID:18772304	Laccase-7	GO:0005507,GO:0016722,GO:0046274,GO:0048046,GO:0052716	copper ion binding|oxidoreductase activity, oxidizing metal ions|lignin catabolic process|apoplast|hydroquinone:oxygen oxidoreductase activity
LOC18772325	4085.37	5539.47	2631.28	0.475006	-1.07398	1.47177e-06	2.66116e-05	Down	62.6826	52.3548	69.6692	37.2636	26.3555	22.7366	GeneID:18772325	Pleiotropic drug resistance protein 2	GO:0005524,GO:0016021,GO:0016887	ATP binding|integral component of membrane|ATPase activity
LOC18772330	507.163	705.584	308.742	0.437569	-1.19242	0.00517714	0.0300905	Down	43.0631	50.4066	76.8169	26.7692	30.8588	15.3965	GeneID:18772330	Elicitor-responsive protein 1	GO:0005544,GO:0005737,GO:0005886	calcium-dependent phospholipid binding|cytoplasm|plasma membrane
LOC18772358	1350.4	407.774	2293.03	5.62329	2.49141	3.33528e-09	1.08714e-07	Up	12.5283	8.22377	13.5202	47.3524	60.9377	80.2086	GeneID:18772358	Mitogen-activated protein kinase kinase kinase 18	GO:0004672,GO:0004674,GO:0004709,GO:0005524,GO:0005634,GO:0005737,GO:0006970,GO:0009737,GO:0009738,GO:0009789,GO:0023014,GO:0031098,GO:0032147,GO:0046777,GO:1900057,GO:1902457,GO:2000038	protein kinase activity|protein serine/threonine kinase activity|MAP kinase kinase kinase activity|ATP binding|nucleus|cytoplasm|response to osmotic stress|response to abscisic acid|abscisic acid-activated signaling pathway|positive regulation of abscisic acid-activated signaling pathway|signal transduction by protein phosphorylation|stress-activated protein kinase signaling cascade|activation of…
LOC18772382	174.861	19.892	329.83	16.581	4.05146	6.18481e-38	2.17357e-35	Up	0.708918	0.328799	0.315846	6.50249	7.95115	7.4642	GeneID:18772382	Protein NRT1/ PTR FAMILY 4.5	GO:0015333,GO:0016021,GO:0035673,GO:1904680	peptide:proton symporter activity|integral component of membrane|oligopeptide transmembrane transporter activity|peptide transmembrane transporter activity
LOC18772391	701.475	326.992	1075.96	3.29048	1.7183	7.78959e-18	7.84192e-16	Up	8.58448	5.605	10.3638	25.0113	28.9588	25.2299	GeneID:18772391	Protein DETOXIFICATION 27	GO:0006855,GO:0015238,GO:0015297,GO:0016021	drug transmembrane transport|drug transmembrane transporter activity|antiporter activity|integral component of membrane
LOC18772394	1592.91	769.582	2416.25	3.13969	1.65062	5.18381e-05	0.000625065	Up	37.3437	19.7191	28.9031	62.8945	88.4916	112.234	GeneID:18772394	Probable mannitol dehydrogenase	GO:0008270,GO:0046029	zinc ion binding|mannitol dehydrogenase activity	ko00940	Phenylpropanoid biosynthesis
LOC18772444	989.665	1330.93	648.396	0.487173	-1.03749	4.14088e-08	1.09194e-06	Down	43.9205	48.9647	50.0395	24.3534	20.9775	22.8843	GeneID:18772444	Glutelin type-D 1	GO:0000326,GO:0045735	protein storage vacuole|nutrient reservoir activity
LOC18772448	347.978	187.811	508.145	2.70562	1.43596	1.54125e-09	5.26339e-08	Up	6.65701	7.97237	6.25518	15.1068	18.8558	21.0868	GeneID:18772448	Protein psi1	GO:0002183,GO:0005634,GO:0005829,GO:0006413,GO:0030544,GO:0051082,GO:0051085,GO:0051087	cytoplasmic translational initiation|nucleus|cytosol|translational initiation|Hsp70 protein binding|unfolded protein binding|chaperone cofactor-dependent protein refolding|chaperone binding
LOC18772451	137.54	24.6509	250.43	10.159	3.34469	2.19301e-25	4.07584e-23	Up	0.299737	0.196613	0.337263	3.36847	2.44788	2.52394	GeneID:18772451	Pleiotropic drug resistance protein 2	GO:0005524,GO:0016021,GO:0016887	ATP binding|integral component of membrane|ATPase activity
LOC18772459	271.919	397.645	146.193	0.367648	-1.4436	1.96995e-05	0.000271592	Down	7.76462	7.81181	11.7632	3.36274	3.19227	3.30622	GeneID:18772459	E3 ubiquitin-protein ligase At4g11680	GO:0005774,GO:0016021,GO:0016567,GO:0016740,GO:0046872	vacuolar membrane|integral component of membrane|protein ubiquitination|transferase activity|metal ion binding
LOC18772506	638.817	194.02	1083.61	5.58506	2.48157	2.01533e-09	6.79832e-08	Up	10.8377	9.51214	7.90923	36.5007	56.5103	60.5477	GeneID:18772506	Protein psi1	GO:0002183,GO:0005634,GO:0005829,GO:0006413,GO:0030544,GO:0051082,GO:0051085,GO:0051087	cytoplasmic translational initiation|nucleus|cytosol|translational initiation|Hsp70 protein binding|unfolded protein binding|chaperone cofactor-dependent protein refolding|chaperone binding
LOC18772510	38.2349	59.6419	16.8279	0.28215	-1.82547	0.00747529	0.0405415	Down	4.01943	4.70282	1.46333	1.16704	1.02599	0.609618	GeneID:18772510
LOC18772531	6.30832	1.01113	11.6055	11.4778	3.52078	0.00877568	0.0457951	Up	0	0	0.114255	0.434343	0.347135	0.525021	GeneID:18772531	Short-chain dehydrogenase TIC 32, chloroplastic	GO:0005516,GO:0009706,GO:0015031,GO:0016491	calmodulin binding|chloroplast inner membrane|protein transport|oxidoreductase activity
LOC18772544	1412.09	888.633	1935.55	2.17812	1.12308	9.3161e-10	3.32234e-08	Up	16.4386	17.0143	14.0764	29.831	34.6447	36.509	GeneID:18772544
LOC18772548	76.2515	105.99	46.5126	0.438838	-1.18824	0.000916944	0.00731776	Down	1.75356	1.73665	2.27486	0.767461	0.767958	0.942231	GeneID:18772548	Protein FAR1-RELATED SEQUENCE 5	GO:0005634,GO:0006355,GO:0008270	nucleus|regulation of transcription, DNA-templated|zinc ion binding
LOC18772560	2977.29	4064.07	1890.51	0.465177	-1.10415	2.91405e-10	1.11979e-08	Down	71.6202	71.5982	66.8744	33.6994	30.629	31.3315	GeneID:18772560	AMP deaminase	GO:0003876,GO:0005524,GO:0005634,GO:0005783,GO:0005829,GO:0009737,GO:0009793,GO:0031307,GO:0032264,GO:0043231,GO:0043424,GO:0046872	AMP deaminase activity|ATP binding|nucleus|endoplasmic reticulum|cytosol|response to abscisic acid|embryo development ending in seed dormancy|integral component of mitochondrial outer membrane|IMP salvage|intracellular membrane-bounded organelle|protein histidine kinase binding|metal ion binding	ko00230	Purine metabolism
LOC18772561	165.511	51.6858	279.337	5.40451	2.43416	0.000453798	0.00400158	Up	1.73513	0.746919	1.9361	10.3613	3.60439	9.70042	GeneID:18772561	Phytoene synthase, chloroplastic	GO:0004310,GO:0006696,GO:0009507,GO:0016117,GO:0016767,GO:0051996	farnesyl-diphosphate farnesyltransferase activity|ergosterol biosynthetic process|chloroplast|carotenoid biosynthetic process|geranylgeranyl-diphosphate geranylgeranyltransferase activity|squalene synthase activity	ko00906	Carotenoid biosynthesis
LOC18772574	960.075	1327.91	592.236	0.44599	-1.16492	4.4429e-05	0.000547684	Down	43.7588	35.2177	31.269	17.9917	9.07978	21.2308	GeneID:18772574	BAHD acyltransferase DCR	GO:0005737,GO:0005829,GO:0010090,GO:0010143,GO:0016747,GO:0051179,GO:0090626	cytoplasm|cytosol|trichome morphogenesis|cutin biosynthetic process|transferase activity, transferring acyl groups other than amino-acyl groups|localization|plant epidermis morphogenesis
LOC18772578	131.591	84.1906	178.992	2.12603	1.08816	0.00021421	0.00210604	Up	3.21895	2.9326	1.53933	5.25724	5.68561	4.99306	GeneID:18772578	F-box/kelch-repeat protein SKIP6	GO:0016567	protein ubiquitination
LOC18772596	460.157	840.258	80.0555	0.0952749	-3.39176	3.46581e-17	3.23626e-15	Down	70.8224	50.4342	66.442	0.538172	0.750998	16.137	GeneID:18772596	Pathogenesis-related protein PR-4A	GO:0005576,GO:0005618,GO:0042742,GO:0050832	extracellular region|cell wall|defense response to bacterium|defense response to fungus
LOC18772600	168.017	230.826	105.208	0.455788	-1.13356	2.58005e-05	0.000341808	Down	7.15155	5.93959	7.16112	2.56538	3.21348	3.23907	GeneID:18772600	Protein phosphatase 2C 37	GO:0004721,GO:0004722,GO:0005634,GO:0005829,GO:0009409,GO:0009414,GO:0009737,GO:0009738,GO:0009788,GO:0010119,GO:0010360,GO:0016791,GO:0019900,GO:0019901,GO:0046872	phosphoprotein phosphatase activity|protein serine/threonine phosphatase activity|nucleus|cytosol|response to cold|response to water deprivation|response to abscisic acid|abscisic acid-activated signaling pathway|negative regulation of abscisic acid-activated signaling pathway|regulation of stomatal movement|negative regulation of anion channel activity|phosphatase activity|kinase binding|protein…	ko04075	Plant hormone signal transduction
LOC18772618	819.217	1303.55	334.884	0.256902	-1.96071	3.13633e-09	1.03099e-07	Down	66.2227	64.3038	93.2031	16.3121	22.4577	17.4009	GeneID:18772618	Protein LURP-one-related 15	GO:0009507,GO:0019904	chloroplast|protein domain specific binding
LOC18772620	551.602	779.207	323.998	0.415805	-1.26602	6.87599e-10	2.49355e-08	Down	18.1669	20.1345	23.0196	7.92838	8.90764	8.09537	GeneID:18772620				ko04120,ko03460	Ubiquitin mediated proteolysis|Fanconi anemia pathway
LOC18772628	8191.42	11125.6	5257.23	0.472534	-1.08151	3.852e-07	8.04053e-06	Down	548.077	636.476	737.946	243.324	346.457	296.391	GeneID:18772628	Protein SRC2	GO:0005789,GO:0005886,GO:0016021,GO:0032586	endoplasmic reticulum membrane|plasma membrane|integral component of membrane|protein storage vacuole membrane
LOC18772634	5606.18	8271.26	2941.1	0.355581	-1.49175	5.44611e-09	1.70889e-07	Down	398.372	272.283	333.965	138.316	101.271	111.482	GeneID:18772634	Peroxidase 21	GO:0004601,GO:0005829,GO:0006979,GO:0009505,GO:0009506,GO:0020037,GO:0042744,GO:0046872,GO:0048511,GO:0050832	peroxidase activity|cytosol|response to oxidative stress|plant-type cell wall|plasmodesma|heme binding|hydrogen peroxide catabolic process|metal ion binding|rhythmic process|defense response to fungus	ko00940	Phenylpropanoid biosynthesis
LOC18772658	393.484	612.596	174.371	0.284643	-1.81278	3.97605e-11	1.75865e-09	Down	31.7537	24.4489	30.6192	12.9225	5.1921	6.34498	GeneID:18772658	Transcription factor MYB4	GO:0005634,GO:0009409,GO:0030154,GO:0043565,GO:0044212,GO:0045893	nucleus|response to cold|cell differentiation|sequence-specific DNA binding|transcription regulatory region DNA binding|positive regulation of transcription, DNA-templated
LOC18772684	20.0951	8.6977	31.4926	3.62079	1.85631	0.00504328	0.0294773	Up	0.0605716	0.525345	0.254445	0.923315	0.966337	1.06483	GeneID:18772684	Uncharacterized mitochondrial carrier C8C9.12c	GO:0005381,GO:0005743,GO:0016021,GO:0048250	iron ion transmembrane transporter activity|mitochondrial inner membrane|integral component of membrane|iron import into the mitochondrion
LOC18772704	248.834	370.611	127.058	0.342833	-1.54442	0.00605623	0.0342183	Down	12.3273	24.6254	30.9366	9.3262	8.37139	5.14696	GeneID:18772704	Stress-response A/B barrel domain-containing protein At5g22580	GO:0009507,GO:0046872	chloroplast|metal ion binding
LOC18772705	36.3119	62.3564	10.2673	0.164656	-2.60247	6.58338e-07	1.29847e-05	Down	7.44858	10.052	6.30837	1.5697	1.14999	1.11811	GeneID:18772705
LOC18772714	37.724	57.0946	18.3535	0.321458	-1.6373	0.000850323	0.006854	Down	0.82921	0.766777	0.748363	0.409105	0.0964609	0.241168	GeneID:18772714	Nardilysin-like	GO:0004222,GO:0005829,GO:0046872	metalloendopeptidase activity|cytosol|metal ion binding
LOC18772728	85.6492	51.5793	119.719	2.32107	1.21479	0.000886458	0.00710674	Up	1.44248	1.04012	0.666543	1.73812	2.74108	2.62533	GeneID:18772728	Scarecrow-like protein 32	GO:0003700,GO:0005634,GO:0006355,GO:0043565	DNA-binding transcription factor activity|nucleus|regulation of transcription, DNA-templated|sequence-specific DNA binding
LOC18772733	380.108	533.204	227.013	0.425752	-1.23192	1.91138e-08	5.40133e-07	Down	29.4613	28.7336	29.7372	14.0553	11.5705	11.0883	GeneID:18772733	Monothiol glutaredoxin-S14, chloroplastic	GO:0006812,GO:0009055,GO:0009507,GO:0009570,GO:0009941,GO:0015035,GO:0015038,GO:0015297,GO:0045454,GO:0046872,GO:0051537	cation transport|electron transfer activity|chloroplast|chloroplast stroma|chloroplast envelope|protein disulfide oxidoreductase activity|glutathione disulfide oxidoreductase activity|antiporter activity|cell redox homeostasis|metal ion binding|2 iron, 2 sulfur cluster binding
LOC18772739	39.197	59.1255	19.2684	0.325891	-1.61754	0.00161318	0.0117726	Down	1.95801	0.903807	1.49324	0.329937	0.619789	0.43388	GeneID:18772739	Probable LRR receptor-like serine/threonine-protein kinase At3g47570
LOC18772741	23.8334	43.2719	4.39489	0.101565	-3.29953	1.14734e-06	2.1283e-05	Down	0.939329	0.958462	1.57302	0.110568	0.0270013	0.210024	GeneID:18772741	Putative leucine-rich repeat receptor-like serine/threonine-protein kinase At2g19230
LOC18772773	33.9239	19.088	48.7597	2.55447	1.35303	0.00749788	0.040607	Up	1.40643	1.16173	1.47701	3.20851	3.91769	2.97803	GeneID:18772773
LOC18772791	422.814	580.768	264.86	0.456051	-1.13273	9.82285e-08	2.37629e-06	Down	11.6318	14.3243	11.015	5.72099	6.39893	4.33436	GeneID:18772791	Subtilisin-like protease SBT5.4	GO:0004252,GO:0005783,GO:0005886,GO:0010074,GO:0040008	serine-type endopeptidase activity|endoplasmic reticulum|plasma membrane|maintenance of meristem identity|regulation of growth
LOC18772799	284.655	443.243	126.066	0.284417	-1.81392	5.81095e-05	0.000690937	Down	17.8729	9.05889	13.9854	3.37057	3.94473	4.077	GeneID:18772799	Probable glycosyltransferase At5g20260	GO:0000139,GO:0006486,GO:0016021,GO:0016757,GO:0071555	Golgi membrane|protein glycosylation|integral component of membrane|transferase activity, transferring glycosyl groups|cell wall organization
LOC18772870	216.877	323.988	109.767	0.338801	-1.56149	2.58395e-07	5.59923e-06	Down	24.8544	17.3427	17.5438	7.09818	4.64308	8.12591	GeneID:18772870	Histone H2B.3	GO:0000786,GO:0003677,GO:0005634,GO:0046982	nucleosome|DNA binding|nucleus|protein heterodimerization activity
LOC18772904	80.8699	12.1123	149.628	12.3533	3.62683	1.62516e-19	1.92716e-17	Up	0.198299	0.354091	0.0867709	3.09471	2.03876	2.56326	GeneID:18772904	Probable receptor-like protein kinase At2g23200
LOC18772914	584.938	864.62	305.255	0.353051	-1.50205	2.36548e-13	1.40684e-11	Down	23.178	25.0624	26.1083	8.80616	7.50515	9.40208	GeneID:18772914
LOC18772926	55.1724	33.7043	76.6405	2.27391	1.18517	0.00386864	0.023898	Up	0.595052	1.01195	0.520761	1.70614	1.85646	1.14864	GeneID:18772926	Probable serine/threonine-protein kinase PBL7	GO:0004675,GO:0005524,GO:0005886,GO:0006468,GO:0009742,GO:1900459	transmembrane receptor protein serine/threonine kinase activity|ATP binding|plasma membrane|protein phosphorylation|brassinosteroid mediated signaling pathway|positive regulation of brassinosteroid mediated signaling pathway
LOC18772948	2039.94	1019.92	3059.95	3.0002	1.58506	2.3477e-18	2.52104e-16	Up	49.0683	49.0869	37.1338	122.098	137.049	136.795	GeneID:18772948	Abscisic acid receptor PYL4	GO:0004864,GO:0005634,GO:0005737,GO:0005886,GO:0009738,GO:0010427,GO:0038023,GO:0042803,GO:0080163	protein phosphatase inhibitor activity|nucleus|cytoplasm|plasma membrane|abscisic acid-activated signaling pathway|abscisic acid binding|signaling receptor activity|protein homodimerization activity|regulation of protein serine/threonine phosphatase activity	ko04075	Plant hormone signal transduction
LOC18772949	10554.4	18245.4	2863.5	0.156944	-2.67168	2.89858e-50	1.47438e-47	Down	1302.21	1195.84	1421.94	217.035	199.156	186.899	GeneID:18772949
LOC18772950	281.779	406.302	157.256	0.387042	-1.36944	5.34116e-09	1.68142e-07	Down	19.9223	22.3417	18.3068	9.25986	7.39611	6.31652	GeneID:18772950	bZIP transcription factor 53	GO:0003700,GO:0005634,GO:0006971,GO:0009267,GO:0043565,GO:0044212,GO:0045735,GO:0045893,GO:0046982,GO:2000693	DNA-binding transcription factor activity|nucleus|hypotonic response|cellular response to starvation|sequence-specific DNA binding|transcription regulatory region DNA binding|nutrient reservoir activity|positive regulation of transcription, DNA-templated|protein heterodimerization activity|positive regulation of seed maturation
LOC18772957	19.0513	36.7446	1.35801	0.0369581	-4.75796	3.53458e-08	9.44949e-07	Down	1.39816	1.05447	1.08528	0.132377	0	0	GeneID:18772957	Basic 7S globulin	GO:0004190,GO:0006508,GO:0030163,GO:0042802,GO:0045735	aspartic-type endopeptidase activity|proteolysis|protein catabolic process|identical protein binding|nutrient reservoir activity
LOC18772963	1791.67	2758.19	825.153	0.299165	-1.74099	1.82269e-15	1.39252e-13	Down	145.501	118.536	110.308	46.4826	37.0711	26.3464	GeneID:18772963	Probable aquaporin PIP2-5	GO:0005773,GO:0005886,GO:0006833,GO:0009414,GO:0009506,GO:0015250,GO:0016021	vacuole|plasma membrane|water transport|response to water deprivation|plasmodesma|water channel activity|integral component of membrane
LOC18773020	808.569	111.557	1505.58	13.4961	3.75447	8.4143e-10	3.02305e-08	Up	1.41233	2.96696	2.96641	20.0587	38.9004	37.3498	GeneID:18773020	Exocyst complex component EXO70H1	GO:0000145,GO:0002237,GO:0005634,GO:0005829,GO:0006887,GO:0006952,GO:0009617,GO:0009620,GO:0012505,GO:0016020,GO:0031982,GO:0045335,GO:1900426	exocyst|response to molecule of bacterial origin|nucleus|cytosol|exocytosis|defense response|response to bacterium|response to fungus|endomembrane system|membrane|vesicle|phagocytic vesicle|positive regulation of defense response to bacterium
LOC18773076	1566	274.156	2857.83	10.4241	3.38185	0.000109594	0.00119008	Up	5.59859	7.24658	9.63593	110.571	88.2429	31.8691	GeneID:18773076	High-affinity nitrate transporter 2.1	GO:0005886,GO:0009705,GO:0010167,GO:0015112,GO:0015706,GO:0016020,GO:0016021,GO:0042128,GO:0048527,GO:0071249	plasma membrane|plant-type vacuole membrane|response to nitrate|nitrate transmembrane transporter activity|nitrate transport|membrane|integral component of membrane|nitrate assimilation|lateral root development|cellular response to nitrate	ko00910	Nitrogen metabolism
LOC18773098	2209	3144.44	1273.56	0.405021	-1.30393	2.65861e-06	4.51567e-05	Down	92.8129	104.694	136.1	38.9182	52.5664	40.4993	GeneID:18773098	Peroxidase 5	GO:0004601,GO:0005576,GO:0006979,GO:0020037,GO:0042744,GO:0046872	peroxidase activity|extracellular region|response to oxidative stress|heme binding|hydrogen peroxide catabolic process|metal ion binding	ko00940	Phenylpropanoid biosynthesis
LOC18773135	25.1726	12.5568	37.7884	3.00939	1.58947	0.00699258	0.0384085	Up	0.177308	0.156797	0.136551	0.36037	0.565743	0.452274	GeneID:18773135	Cysteine-rich receptor-like protein kinase 25
LOC18773139	184.487	252.253	116.721	0.462713	-1.11181	1.987e-05	0.000273747	Down	8.7263	7.76549	6.39993	3.73822	3.25599	3.37285	GeneID:18773139	Zinc finger protein WIP3	GO:0003676,GO:0003700,GO:0005634,GO:0006355,GO:0010468,GO:0046872	nucleic acid binding|DNA-binding transcription factor activity|nucleus|regulation of transcription, DNA-templated|regulation of gene expression|metal ion binding
LOC18773169	512.553	71.233	953.872	13.3909	3.74318	6.94052e-11	2.968e-09	Up	0.752079	0.525615	1.03867	10.6005	13.0613	6.75448	GeneID:18773169	Putative disease resistance protein At1g50180
LOC18773185	43.0851	25.0049	61.1653	2.44614	1.2905	0.00457241	0.027261	Up	0.716163	1.12657	0.53274	1.49455	1.71381	2.43775	GeneID:18773185	UDP-glycosyltransferase 91A1	GO:0008194,GO:0043231,GO:0080043,GO:0080044	UDP-glycosyltransferase activity|intracellular membrane-bounded organelle|quercetin 3-O-glucosyltransferase activity|quercetin 7-O-glucosyltransferase activity
LOC18773194	49.6043	71.8226	27.386	0.3813	-1.391	0.00113927	0.00875584	Down	1.43517	1.24304	1.12164	0.454255	0.461475	0.500457	GeneID:18773194	TPR repeat-containing thioredoxin TTL1	GO:0005623,GO:0006970,GO:0009651,GO:0009737,GO:0009738,GO:0009789,GO:0045454	cell|response to osmotic stress|response to salt stress|response to abscisic acid|abscisic acid-activated signaling pathway|positive regulation of abscisic acid-activated signaling pathway|cell redox homeostasis
LOC18773195	83.8774	114.584	53.1705	0.46403	-1.10771	0.00113711	0.00874272	Down	5.13778	5.89231	4.41459	2.40406	2.52899	2.06372	GeneID:18773195	ADP-ribosylation factor 1	GO:0005525,GO:0005794,GO:0015031,GO:0016192	GTP binding|Golgi apparatus|protein transport|vesicle-mediated transport	ko04072,ko04144	Phospholipase D signaling pathway|Endocytosis
LOC18773200	61.2793	12.7912	109.767	8.5815	3.10123	3.51977e-06	5.81981e-05	Up	0.39716	0.176196	0.126941	2.42539	2.38754	1.0714	GeneID:18773200	Receptor-like protein 35	GO:0005886,GO:0016021	plasma membrane|integral component of membrane
LOC18773215	297.341	441.372	153.309	0.347345	-1.52556	6.40497e-11	2.75728e-09	Down	13.6648	13.1348	12.7759	5.1751	4.09227	4.2129	GeneID:18773215	BTB/POZ and TAZ domain-containing protein 4	GO:0003712,GO:0004402,GO:0005516,GO:0005634,GO:0005737,GO:0005774,GO:0006355,GO:0008270,GO:0009611,GO:0009651,GO:0009733,GO:0009739,GO:0009751,GO:0009753,GO:0016567,GO:0042542	transcription coregulator activity|histone acetyltransferase activity|calmodulin binding|nucleus|cytoplasm|vacuolar membrane|regulation of transcription, DNA-templated|zinc ion binding|response to wounding|response to salt stress|response to auxin|response to gibberellin|response to salicylic acid|response to jasmonic acid|protein ubiquitination|response to hydrogen peroxide
LOC18773216	452.707	772.512	132.903	0.17204	-2.53918	5.89181e-30	1.46004e-27	Down	56.9645	54.9279	62.2909	10.2339	11.2084	7.8788	GeneID:18773216	Dirigent protein 20	GO:0048046	apoplast
LOC18773223	30.4242	0	60.8485	Inf	Inf	9.29397e-18	9.21247e-16	Up	0	0	0	2.59936	2.44679	3.14204	GeneID:18773223
LOC18773231	81.5028	115.556	47.4497	0.410621	-1.28412	0.00232651	0.0158565	Down	7.5912	8.35442	3.98608	2.65673	2.1338	3.19609	GeneID:18773231	Photosystem I reaction center subunit XI, chloroplastic	GO:0009507,GO:0009534,GO:0009535,GO:0009538,GO:0009579,GO:0009941,GO:0010287,GO:0015979,GO:0016020,GO:0016021,GO:0019904,GO:0031969	chloroplast|chloroplast thylakoid|chloroplast thylakoid membrane|photosystem I reaction center|thylakoid|chloroplast envelope|plastoglobule|photosynthesis|membrane|integral component of membrane|protein domain specific binding|chloroplast membrane	ko00195	Photosynthesis
LOC18773256	53.5971	32.4904	74.7039	2.29926	1.20117	0.00362681	0.0226723	Up	1.09489	0.680032	0.674906	1.91778	1.87333	1.72296	GeneID:18773256	Adenine DNA glycosylase	GO:0000701,GO:0005634,GO:0006281,GO:0006284,GO:0006298,GO:0032357,GO:0034039,GO:0035485,GO:0046872,GO:0051539	purine-specific mismatch base pair DNA N-glycosylase activity|nucleus|DNA repair|base-excision repair|mismatch repair|oxidized purine DNA binding|8-oxo-7,8-dihydroguanine DNA N-glycosylase activity|adenine/guanine mispair binding|metal ion binding|4 iron, 4 sulfur cluster binding	ko03410	Base excision repair
LOC18773282	839.558	1177.95	501.168	0.425459	-1.23291	1.43397e-10	5.81072e-09	Down	48.8584	56.4847	41.0729	22.2083	20.028	18.6633	GeneID:18773282	Homeobox-leucine zipper protein HAT22	GO:0003700,GO:0005634,GO:0009414,GO:0009735,GO:0009737,GO:0009738,GO:0043565	DNA-binding transcription factor activity|nucleus|response to water deprivation|response to cytokinin|response to abscisic acid|abscisic acid-activated signaling pathway|sequence-specific DNA binding
LOC18773331	95.5866	152.252	38.9213	0.255637	-1.96783	0.000181116	0.00183	Down	4.24388	9.26596	8.53032	1.68932	2.47525	1.3213	GeneID:18773331	Cationic peroxidase 1	GO:0004601,GO:0005576,GO:0006979,GO:0020037,GO:0042744,GO:0046872	peroxidase activity|extracellular region|response to oxidative stress|heme binding|hydrogen peroxide catabolic process|metal ion binding	ko00940	Phenylpropanoid biosynthesis
LOC18773337	3263.47	1814.9	4712.04	2.59631	1.37646	0.000869017	0.00699302	Up	103.971	114.768	103.312	178.581	341.147	292.458	GeneID:18773337
LOC18773345	307.485	197.916	417.055	2.10724	1.07535	0.00855237	0.0450092	Up	5.0488	7.02217	6.78551	17.6696	7.89487	13.5807	GeneID:18773345	Transcription factor bHLH93	GO:0003677,GO:0003700,GO:0005634,GO:0007275,GO:0010371,GO:0045487,GO:0046983	DNA binding|DNA-binding transcription factor activity|nucleus|multicellular organism development|regulation of gibberellin biosynthetic process|gibberellin catabolic process|protein dimerization activity
LOC18773350	1222.46	1791.16	653.762	0.364993	-1.45406	8.27472e-08	2.04529e-06	Down	55.5188	45.3931	35.3608	16.5029	15.5082	16.616	GeneID:18773350
LOC18773360	144.498	80.8296	208.166	2.57537	1.36478	0.00600508	0.0340288	Up	4.01434	1.69494	3.12551	6.44326	5.33695	10.557	GeneID:18773360	Short-chain dehydrogenase reductase 2a	GO:0016491	oxidoreductase activity
LOC18773374	127.053	188.161	65.946	0.350476	-1.51261	3.57225e-05	0.000454263	Down	3.28411	4.79802	3.07659	1.03616	1.92506	0.829727	GeneID:18773374	Ribosomal RNA-processing protein 12	GO:0000462,GO:0003723,GO:0005634,GO:0005730,GO:0005840,GO:0030688,GO:0042254	maturation of SSU-rRNA from tricistronic rRNA transcript (SSU-rRNA, 5.8S rRNA, LSU-rRNA)|RNA binding|nucleus|nucleolus|ribosome|preribosome, small subunit precursor|ribosome biogenesis
LOC18773391	47.0605	19.7018	74.4192	3.77727	1.91734	0.00147895	0.0109318	Up	1.20217	0.507582	0.870689	3.656	4.18852	1.71471	GeneID:18773391	Putative UDP-rhamnose:rhamnosyltransferase 1	GO:0016021,GO:0016758	integral component of membrane|transferase activity, transferring hexosyl groups
LOC18773397	193.825	100.987	286.663	2.83861	1.50518	1.15308e-08	3.39753e-07	Up	1.91403	3.14388	2.4268	5.92166	8.09321	6.66201	GeneID:18773397	Probable LRR receptor-like serine/threonine-protein kinase RKF3
LOC18773417	68.1743	111.76	24.5885	0.220012	-2.18435	2.12702e-08	5.95614e-07	Down	2.68667	3.12214	3.00437	0.487546	0.55562	0.848918	GeneID:18773417	4-alpha-glucanotransferase, chloroplastic/amyloplastic	GO:0004134,GO:0009501,GO:0009507,GO:0102500	4-alpha-glucanotransferase activity|amyloplast|chloroplast|beta-maltose 4-alpha-glucanotransferase activity	ko00500	Starch and sucrose metabolism
LOC18773420	415.46	722.34	108.58	0.150317	-2.73392	6.90673e-13	3.89295e-11	Down	33.3952	41.4908	24.4407	3.39119	5.19893	5.90476	GeneID:18773420	Agamous-like MADS-box protein AGL21	GO:0000977,GO:0003700,GO:0005634,GO:0008134,GO:0045944,GO:0046983	RNA polymerase II regulatory region sequence-specific DNA binding|DNA-binding transcription factor activity|nucleus|transcription factor binding|positive regulation of transcription by RNA polymerase II|protein dimerization activity
LOC18773428	32.7138	1.58081	63.8469	40.3887	5.33588	2.59804e-14	1.74974e-12	Up	0.163148	0.0416179	0	2.70898	3.03662	2.31979	GeneID:18773428	Short-chain dehydrogenase TIC 32, chloroplastic	GO:0005516,GO:0009706,GO:0015031,GO:0016491	calmodulin binding|chloroplast inner membrane|protein transport|oxidoreductase activity
LOC18773431	16.1596	1.01113	31.308	30.9635	4.9525	1.54541e-07	3.61199e-06	Up	0	0	0.113524	0.902362	1.53295	1.04333	GeneID:18773431	Probable mannitol dehydrogenase	GO:0008270,GO:0046029	zinc ion binding|mannitol dehydrogenase activity	ko00940	Phenylpropanoid biosynthesis
LOC18773432	1119.26	1560.03	678.503	0.434931	-1.20114	1.4864e-10	6.0106e-09	Down	123.516	118.431	133.546	52.7182	51.8197	55.3354	GeneID:18773432
LOC18773439	206.718	412.76	0.675036	0.00163542	-9.25612	1.21821e-78	1.96223e-75	Down	24.1483	28.8131	31.9047	0.0706799	0	0.0671282	GeneID:18773439
LOC18773444	970.17	1394.63	545.706	0.391289	-1.35369	5.17202e-08	1.33116e-06	Down	37.3443	53.2082	40.2733	13.1569	20.7077	15.887	GeneID:18773444
LOC18773448	217.616	329.757	105.475	0.319856	-1.64451	3.88056e-09	1.24369e-07	Down	23.3993	20.1808	29.0348	6.97595	9.11038	6.62541	GeneID:18773448	Disease resistance protein Pik-1	GO:0005524,GO:0009626,GO:0009870,GO:0042742,GO:0043531	ATP binding|plant-type hypersensitive response|defense response signaling pathway, resistance gene-dependent|defense response to bacterium|ADP binding
LOC18773456	17.0024	29.2192	4.78563	0.163784	-2.61014	0.000562188	0.00482184	Down	0.37244	0.459198	0.602993	0.0844827	0.0660197	0.0802374	GeneID:18773456	Probable LRR receptor-like serine/threonine-protein kinase At1g06840
LOC18773477	72.7125	105.713	39.7118	0.375656	-1.41251	0.000170905	0.00174281	Down	2.45315	2.8261	3.54581	0.402089	1.20636	1.60937	GeneID:18773477	Syntaxin-71	GO:0000149,GO:0005484,GO:0005783,GO:0005886,GO:0006612,GO:0006886,GO:0006906,GO:0008565,GO:0009506,GO:0012505,GO:0016021,GO:0031201,GO:0048278	SNARE binding|SNAP receptor activity|endoplasmic reticulum|plasma membrane|protein targeting to membrane|intracellular protein transport|vesicle fusion|protein transporter activity|plasmodesma|endomembrane system|integral component of membrane|SNARE complex|vesicle docking	ko04130	SNARE interactions in vesicular transport
LOC18773479	682.639	371.081	994.198	2.6792	1.4218	7.22925e-09	2.218e-07	Up	6.88864	15.6002	6.81797	28.0322	24.7207	23.728	GeneID:18773479	Aluminum-activated malate transporter 2	GO:0009705,GO:0015743,GO:0016021	plant-type vacuole membrane|malate transport|integral component of membrane
LOC18773488	372.456	671.24	73.6716	0.109754	-3.18765	2.37397e-10	9.28877e-09	Down	79.9849	66.8983	41.7207	6.35823	8.84578	4.94078	GeneID:18773488	Wound-induced protein 1
LOC18773497	621.3	384.509	858.091	2.23166	1.15811	9.16089e-09	2.75382e-07	Up	10.5611	9.99685	11.5059	20.6753	26.8908	22.3054	GeneID:18773497	Nodulation-signaling pathway 2 protein	GO:0005783,GO:0009877,GO:0031965	endoplasmic reticulum|nodulation|nuclear membrane
LOC18773522	1049.73	337.057	1762.39	5.22876	2.38647	5.04591e-06	8.15528e-05	Up	7.27556	13.4621	6.75285	38.2418	63.3218	37.6977	GeneID:18773522	Licodione synthase	GO:0004497,GO:0005506,GO:0016021,GO:0016705,GO:0020037	monooxygenase activity|iron ion binding|integral component of membrane|oxidoreductase activity, acting on paired donors, with incorporation or reduction of molecular oxygen|heme binding
LOC18773555	194.173	83.2869	305.059	3.66275	1.87293	1.81524e-06	3.21602e-05	Up	2.48589	1.90821	1.62865	5.14018	7.49518	8.84399	GeneID:18773555	Protein DETOXIFICATION 53	GO:0006855,GO:0015238,GO:0015297,GO:0016021	drug transmembrane transport|drug transmembrane transporter activity|antiporter activity|integral component of membrane
LOC18773579	48.6964	71.5519	25.841	0.36115	-1.46933	0.000599787	0.00510942	Down	2.56105	1.97325	1.39968	0.682899	0.945018	0.459413	GeneID:18773579	Protochlorophyllide-dependent translocon component 52, chloroplastic	GO:0009507,GO:0009536,GO:0009706,GO:0009941,GO:0010277,GO:0015031,GO:0016021,GO:0046872,GO:0051537	chloroplast|plastid|chloroplast inner membrane|chloroplast envelope|chlorophyllide a oxygenase [overall] activity|protein transport|integral component of membrane|metal ion binding|2 iron, 2 sulfur cluster binding
LOC18773593	2065.18	2767.78	1362.58	0.4923	-1.02239	0.000161688	0.00165885	Down	86.4366	90.3526	126.342	47.6222	52.8167	45.6947	GeneID:18773593	Probable aldo-keto reductase 1	GO:0016491	oxidoreductase activity
LOC18773601	529.914	325.89	733.938	2.2521	1.17127	0.00288893	0.0188267	Up	6.58532	3.14156	7.84987	10.2245	11.7521	16.8566	GeneID:18773601	Type I inositol polyphosphate 5-phosphatase 8	GO:0004439,GO:0034485,GO:0046856	phosphatidylinositol-4,5-bisphosphate 5-phosphatase activity|phosphatidylinositol-3,4,5-trisphosphate 5-phosphatase activity|phosphatidylinositol dephosphorylation
LOC18773606	14.1345	0.337042	27.9319	82.8737	6.37284	2.13352e-05	0.000290823	Up	0	0	0.0138293	0.215069	0.294118	0.626402	GeneID:18773606	Probable LRR receptor-like serine/threonine-protein kinase At3g47570
LOC18773622	572.799	2.27526	1143.32	502.503	8.97299	4.52916e-48	2.1886e-45	Up	0.0625134	0.0637867	0.0984759	33.4882	45.6106	31.3529	GeneID:18773622	Probable CCR4-associated factor 1 homolog 11	GO:0000289,GO:0000932,GO:0003723,GO:0004535,GO:0005634,GO:0008408,GO:0017148,GO:0030015,GO:0042742,GO:0043928,GO:0046872	nuclear-transcribed mRNA poly(A) tail shortening|P-body|RNA binding|poly(A)-specific ribonuclease activity|nucleus|3'-5' exonuclease activity|negative regulation of translation|CCR4-NOT core complex|defense response to bacterium|exonucleolytic nuclear-transcribed mRNA catabolic process involved in deadenylation-dependent decay|metal ion binding	ko03018	RNA degradation
LOC18773623	9.48196	0.990333	17.9736	18.149	4.18182	0.000372141	0.00338341	Up	0.0269959	0	0.0567014	0.352722	0.803943	0.334998	GeneID:18773623	UDP-glycosyltransferase 86A1	GO:0008194,GO:0043231,GO:0080043,GO:0080044	UDP-glycosyltransferase activity|intracellular membrane-bounded organelle|quercetin 3-O-glucosyltransferase activity|quercetin 7-O-glucosyltransferase activity
LOC18773628	290.781	149.164	432.398	2.89882	1.53547	0.000225094	0.00219297	Up	4.35674	2.1131	2.74933	7.91321	6.64929	11.637	GeneID:18773628	Probable 1-deoxy-D-xylulose-5-phosphate synthase 2, chloroplastic	GO:0008661,GO:0009228,GO:0009507,GO:0016114,GO:0046872,GO:0052865	1-deoxy-D-xylulose-5-phosphate synthase activity|thiamine biosynthetic process|chloroplast|terpenoid biosynthetic process|metal ion binding|1-deoxy-D-xylulose 5-phosphate biosynthetic process	ko00730,ko00900	Thiamine metabolism|Terpenoid backbone biosynthesis
LOC18773649	255.534	409.74	101.328	0.247298	-2.01568	3.89046e-16	3.22741e-14	Down	8.13634	6.76	7.89873	1.70291	1.81296	1.99896	GeneID:18773649	Tropinone reductase homolog At2g29150	GO:0016491	oxidoreductase activity	ko00960	Tropane, piperidine and pyridine alkaloid biosynthesis
LOC18773659	13.246	25.4736	1.01851	0.039983	-4.64447	0.000189728	0.0018962	Down	1.80835	0.724894	2.64517	0.210959	0	0	GeneID:18773659	Non-cyanogenic beta-glucosidase	GO:0005975,GO:0008422,GO:0102483	carbohydrate metabolic process|beta-glucosidase activity|scopolin beta-glucosidase activity	ko00940,ko00460,ko00500	Phenylpropanoid biosynthesis|Cyanoamino acid metabolism|Starch and sucrose metabolism
LOC18773666	140.674	47.4949	233.852	4.92374	2.29975	1.41025e-05	0.000202366	Up	1.91892	0.822929	1.4311	7.11588	4.17057	8.94396	GeneID:18773666	7-deoxyloganetic acid glucosyltransferase	GO:0035251,GO:0102970,GO:1900994	UDP-glucosyltransferase activity|7-deoxyloganetic acid glucosyltransferase activity|(-)-secologanin biosynthetic process
LOC18773670	1379.59	11.4127	2747.78	240.765	7.91148	4.26486e-08	1.1202e-06	Up	0.0518124	0.845883	0.0544125	112.433	87.757	21.6727	GeneID:18773670	High-affinity nitrate transporter 2.1	GO:0005886,GO:0009705,GO:0010167,GO:0015112,GO:0015706,GO:0016020,GO:0016021,GO:0042128,GO:0048527,GO:0071249	plasma membrane|plant-type vacuole membrane|response to nitrate|nitrate transmembrane transporter activity|nitrate transport|membrane|integral component of membrane|nitrate assimilation|lateral root development|cellular response to nitrate	ko00910	Nitrogen metabolism
LOC18773697	210.211	280.313	140.108	0.499827	-1.0005	8.09646e-05	0.000918946	Down	8.95276	11.0037	10.1855	5.46472	2.7051	6.62791	GeneID:18773697	Expansin-A6
LOC18773710	3002.88	4181.53	1824.23	0.436258	-1.19675	2.60878e-05	0.000344904	Down	112.698	121.718	148.163	76.2869	58.6559	29.2624	GeneID:18773710	Beta-glucosidase 12	GO:0005576,GO:0005975,GO:0008422,GO:0102483	extracellular region|carbohydrate metabolic process|beta-glucosidase activity|scopolin beta-glucosidase activity	ko00940,ko00460,ko00500	Phenylpropanoid biosynthesis|Cyanoamino acid metabolism|Starch and sucrose metabolism
LOC18773715	770.574	1045.2	495.946	0.474497	-1.07553	1.59841e-07	3.70453e-06	Down	25.811	25.5217	31.2483	9.43119	14.0711	14.7137	GeneID:18773715	Cytochrome P450 81E8	GO:0004497,GO:0005506,GO:0016021,GO:0016705,GO:0020037	monooxygenase activity|iron ion binding|integral component of membrane|oxidoreductase activity, acting on paired donors, with incorporation or reduction of molecular oxygen|heme binding
LOC18773733	37.4037	66.2177	8.58968	0.129719	-2.94654	2.86996e-08	7.87975e-07	Down	1.02665	0.816482	1.316	0.197264	0.144519	0.0624504	GeneID:18773733	Probable LRR receptor-like serine/threonine-protein kinase At3g47570
LOC18773755	2308.95	1322.78	3295.12	2.49107	1.31676	3.02967e-08	8.2596e-07	Up	35.7417	38.1533	37.6751	72.5872	97.8232	100.561	GeneID:18773755	Probable E3 ubiquitin-protein ligase RHC2A	GO:0005737,GO:0016567,GO:0046872,GO:0061630	cytoplasm|protein ubiquitination|metal ion binding|ubiquitin protein ligase activity
LOC18773758	33.5183	9.39691	57.6397	6.1339	2.6168	1.35935e-06	2.47642e-05	Up	0.337376	0.219067	0.354307	1.2022	2.15295	2.09328	GeneID:18773758
LOC18773822	14065.7	7865.93	20265.5	2.57637	1.36534	7.7097e-05	0.000880737	Up	301.274	421.507	347.879	663.767	1101.33	915.745	GeneID:18773822	Probable CCR4-associated factor 1 homolog 11	GO:0000289,GO:0000932,GO:0003723,GO:0004535,GO:0005634,GO:0008408,GO:0017148,GO:0030015,GO:0042742,GO:0043928,GO:0046872	nuclear-transcribed mRNA poly(A) tail shortening|P-body|RNA binding|poly(A)-specific ribonuclease activity|nucleus|3'-5' exonuclease activity|negative regulation of translation|CCR4-NOT core complex|defense response to bacterium|exonucleolytic nuclear-transcribed mRNA catabolic process involved in deadenylation-dependent decay|metal ion binding	ko03018	RNA degradation
LOC18773847	496.219	701.427	291.01	0.414882	-1.26923	1.37098e-09	4.75225e-08	Down	23.6644	30.2324	32.1733	10.5848	10.7926	13.5373	GeneID:18773847	Probable calcium-binding protein CML48	GO:0005509	calcium ion binding
LOC18773868	445.003	149.715	740.291	4.94466	2.30587	3.71342e-18	3.81791e-16	Up	2.69215	3.83193	4.20524	14.3606	19.1048	18.2945	GeneID:18773868
LOC18773876	329.326	509.102	149.55	0.293752	-1.76733	0.000274729	0.00260689	Down	11.3886	6.91426	12.2193	1.61201	1.89765	5.26038	GeneID:18773876	ACT domain-containing protein ACR1	GO:0005634,GO:0016597	nucleus|amino acid binding
LOC18773884	159.034	297.625	20.4438	0.0686896	-3.86376	0.00186416	0.0132863	Down	7.61941	3.15334	14.157	0.406103	0.425026	0.854042	GeneID:18773884	Beta-glucosidase 12	GO:0005576,GO:0005975,GO:0008422,GO:0102483	extracellular region|carbohydrate metabolic process|beta-glucosidase activity|scopolin beta-glucosidase activity	ko00940,ko00460,ko00500	Phenylpropanoid biosynthesis|Cyanoamino acid metabolism|Starch and sucrose metabolism
LOC18773898	114.721	156.193	73.2493	0.468968	-1.09244	0.00115694	0.00886071	Down	4.30389	4.98702	2.78343	2.4622	1.62929	1.4584	GeneID:18773898	Bifunctional 3-dehydroquinate dehydratase/shikimate dehydrogenase, chloroplastic	GO:0003855,GO:0004764,GO:0009073,GO:0009423,GO:0009507,GO:0009570,GO:0009793,GO:0019632,GO:0050661	3-dehydroquinate dehydratase activity|shikimate 3-dehydrogenase (NADP+) activity|aromatic amino acid family biosynthetic process|chorismate biosynthetic process|chloroplast|chloroplast stroma|embryo development ending in seed dormancy|shikimate metabolic process|NADP binding	ko01230,ko00400	Biosynthesis of amino acids|Phenylalanine, tyrosine and tryptophan biosynthesis
LOC18773917	66.1288	106.02	26.2381	0.247483	-2.0146	2.07321e-07	4.63809e-06	Down	10.3755	8.02032	8.00703	1.54049	3.26038	1.54437	GeneID:18773917	Transcriptional regulator TAC1	GO:0003677,GO:0003700,GO:0005634,GO:0006355,GO:0046872,GO:0051973	DNA binding|DNA-binding transcription factor activity|nucleus|regulation of transcription, DNA-templated|metal ion binding|positive regulation of telomerase activity
LOC18773950	33.6758	6.10793	61.2437	10.0269	3.3258	6.04867e-09	1.87664e-07	Up	0.145268	0.543497	0.254263	2.47798	4.01708	2.65391	GeneID:18773950
LOC18774013	271.749	496.64	46.8585	0.0943511	-3.40582	0.00430242	0.0259347	Down	11.8495	3.92894	20.0021	0.873434	1.07258	1.37467	GeneID:18774013	Beta-glucosidase 12	GO:0005576,GO:0005975,GO:0008422,GO:0102483	extracellular region|carbohydrate metabolic process|beta-glucosidase activity|scopolin beta-glucosidase activity	ko00940,ko00460,ko00500	Phenylpropanoid biosynthesis|Cyanoamino acid metabolism|Starch and sucrose metabolism
LOC18774021	69.6572	1.8949	137.419	72.5209	6.18032	7.23733e-30	1.74863e-27	Up	0	0.173886	0	4.26764	4.10831	3.73011	GeneID:18774021	Beta-glucosidase 11	GO:0005975,GO:0008422,GO:0102483	carbohydrate metabolic process|beta-glucosidase activity|scopolin beta-glucosidase activity	ko00940,ko00460,ko00500	Phenylpropanoid biosynthesis|Cyanoamino acid metabolism|Starch and sucrose metabolism
LOC18774056	229.352	148.562	310.142	2.08763	1.06186	1.51792e-05	0.000216145	Up	2.46229	3.0547	2.8277	5.03406	6.01013	5.95347	GeneID:18774056	Protein UPSTREAM OF FLC
LOC18774076	132.957	60.4996	205.415	3.39532	1.76355	0.000754739	0.00622105	Up	1.32885	2.18125	2.03262	5.59874	8.51071	4.2121	GeneID:18774076	UPF0481 protein At3g47200	GO:0005886,GO:0016021	plasma membrane|integral component of membrane
LOC18774086	17.3297	0.315816	34.3437	108.746	6.76482	1.37361e-09	4.75225e-08	Up	0	0.0269854	0	0.777479	1.12513	0.902502	GeneID:18774086	Licodione synthase	GO:0004497,GO:0005506,GO:0016021,GO:0016705,GO:0020037	monooxygenase activity|iron ion binding|integral component of membrane|oxidoreductase activity, acting on paired donors, with incorporation or reduction of molecular oxygen|heme binding
LOC18774107	303.065	412.386	193.743	0.469809	-1.08985	2.26646e-06	3.91846e-05	Down	16.1426	18.2828	19.5107	9.79953	6.76216	8.32516	GeneID:18774107	Uncharacterized protein At3g17950
LOC18774110	42.6128	12.8704	72.3551	5.62181	2.49103	1.85902e-07	4.22742e-06	Up	0.0584588	0.134211	0.399051	1.17754	1.15025	0.952122	GeneID:18774110	Probable leucine-rich repeat receptor-like protein kinase At5g49770
LOC18774121	1290.44	1885.38	695.504	0.368893	-1.43872	0.000281329	0.00265518	Down	268.27	142.732	200.899	67.828	78.5902	74.5017	GeneID:18774121	Hydrophobic protein RCI2B	GO:0009409,GO:0016021	response to cold|integral component of membrane
LOC18774135	75.9565	0.315816	151.597	480.018	8.90694	1.18387e-37	4.08626e-35	Up	0	0.014634	0	2.46726	2.37957	1.89835	GeneID:18774135	Probable leucine-rich repeat receptor-like protein kinase At5g49770
LOC18774141	5.14348	0.315816	9.97114	31.5726	4.9806	0.00524774	0.0304331	Up	0	0.0351912	0	0.337965	0.440177	0.285318	GeneID:18774141
LOC18774142	3604.41	4961.18	2247.64	0.453044	-1.14228	1.74858e-08	4.98499e-07	Down	170.831	136.532	132.27	53.4046	62.4872	78.5395	GeneID:18774142	Isovaleryl-CoA dehydrogenase, mitochondrial	GO:0005739,GO:0006552,GO:0008470,GO:0050660,GO:1902196,GO:1902198	mitochondrion|leucine catabolic process|isovaleryl-CoA dehydrogenase activity|flavin adenine dinucleotide binding|isovaleryl-CoA(4-) catabolic process|3-methylbut-2-enoyl-CoA(4-) metabolic process	ko00280	Valine, leucine and isoleucine degradation
LOC18774146	756.728	438.485	1074.97	2.45156	1.2937	0.000414055	0.00370694	Up	9.51052	14.208	10.2439	24.7993	35.014	21.1827	GeneID:18774146	Cytochrome P450 81E8	GO:0004497,GO:0005506,GO:0016021,GO:0016705,GO:0020037	monooxygenase activity|iron ion binding|integral component of membrane|oxidoreductase activity, acting on paired donors, with incorporation or reduction of molecular oxygen|heme binding
LOC18774170	66.6478	104.23	29.0657	0.278861	-1.84238	1.41453e-06	2.57045e-05	Down	3.72299	2.82119	2.50114	0.715348	1.33931	0.396317	GeneID:18774170	Probable plastid-lipid-associated protein 12, chloroplastic	GO:0009507,GO:0009534,GO:0009535,GO:0009941,GO:0016020	chloroplast|chloroplast thylakoid|chloroplast thylakoid membrane|chloroplast envelope|membrane
LOC18774180	136.737	232.58	40.8931	0.175823	-2.5078	3.32569e-16	2.78278e-14	Down	3.08736	3.38359	4.05286	0.591384	0.425657	0.798158	GeneID:18774180	TMV resistance protein N	GO:0005524,GO:0005737,GO:0007165,GO:0009626,GO:0043531	ATP binding|cytoplasm|signal transduction|plant-type hypersensitive response|ADP binding
LOC18774216	423.302	275.195	571.409	2.07638	1.05407	7.52034e-07	1.45798e-05	Up	6.66396	7.94631	8.17851	15.792	16.0653	14.431	GeneID:18774216	Phospholipase A(1) LCAT3	GO:0005783,GO:0008374,GO:0008970,GO:0016042,GO:0031090,GO:0052739,GO:0052740	endoplasmic reticulum|O-acyltransferase activity|phospholipase A1 activity|lipid catabolic process|organelle membrane|phosphatidylserine 1-acylhydrolase activity|1-acyl-2-lysophosphatidylserine acylhydrolase activity
LOC18774233	62236.1	84932.9	39539.2	0.465535	-1.10304	5.07761e-11	2.20551e-09	Down	1937.71	1960.47	1863.42	978.915	939.429	707.246	GeneID:18774233	Asparagine synthetase [glutamine-hydrolyzing]	GO:0004066,GO:0005524,GO:0006541,GO:0070981	asparagine synthase (glutamine-hydrolyzing) activity|ATP binding|glutamine metabolic process|L-asparagine biosynthetic process	ko00250	Alanine, aspartate and glutamate metabolism
LOC18774243	18.2935	6.69971	29.8872	4.46097	2.15736	0.00236365	0.0160249	Up	0.380555	0.388306	0.133218	1.33514	1.52905	1.04942	GeneID:18774243	Protein CONSERVED IN THE GREEN LINEAGE AND DIATOMS 27, chloroplastic	GO:0009507,GO:0016021,GO:1990641	chloroplast|integral component of membrane|response to iron ion starvation
LOC18774252	25.6591	10.9552	40.363	3.68437	1.88142	0.00138989	0.0103767	Up	0.327615	0.334288	0.286713	1.54575	0.958219	0.931662	GeneID:18774252	Ammonium transporter 1 member 3	GO:0005887,GO:0008519,GO:0015696,GO:0072488	integral component of plasma membrane|ammonium transmembrane transporter activity|ammonium transport|ammonium transmembrane transport
LOC18774282	227.845	87.0099	368.68	4.23721	2.08312	6.13671e-05	0.00072283	Up	2.30215	2.19244	2.55199	12.8394	5.52275	11.0832	GeneID:18774282	Cytochrome P450 714C2	GO:0004497,GO:0005506,GO:0016021,GO:0016705,GO:0020037	monooxygenase activity|iron ion binding|integral component of membrane|oxidoreductase activity, acting on paired donors, with incorporation or reduction of molecular oxygen|heme binding
LOC18774292	930.642	1442.92	418.364	0.289942	-1.78616	3.13475e-05	0.000404214	Down	60.8868	44.9385	79.1606	11.3142	15.9736	25.1432	GeneID:18774292
LOC18774295	1063.14	1479.51	646.773	0.437154	-1.19379	2.25248e-10	8.83127e-09	Down	52.1702	43.9027	50.6117	18.3776	21.0824	23.2182	GeneID:18774295	Acyl-CoA-binding domain-containing protein 1	GO:0000062,GO:0005576,GO:0005783,GO:0005789,GO:0005886,GO:0006629,GO:0006869,GO:0008289,GO:0009409,GO:0009505,GO:0009737,GO:0010029,GO:0010162,GO:0010288,GO:0016021,GO:0032791,GO:0048316,GO:0070300,GO:1900140	fatty-acyl-CoA binding|extracellular region|endoplasmic reticulum|endoplasmic reticulum membrane|plasma membrane|lipid metabolic process|lipid transport|lipid binding|response to cold|plant-type cell wall|response to abscisic acid|regulation of seed germination|seed dormancy process|response to lead ion|integral component of membrane|lead ion binding|seed development|phosphatidic acid binding|reg…
LOC18774304	4606.15	1460.46	7751.84	5.30779	2.40811	1.90225e-09	6.43933e-08	Up	31.7568	43.7592	54.3937	170.438	276.662	224.937	GeneID:18774304	Probable protein phosphatase 2C 25	GO:0004722,GO:0005634,GO:0009536,GO:0009611,GO:0009620,GO:0009738,GO:0046872,GO:0050832	protein serine/threonine phosphatase activity|nucleus|plastid|response to wounding|response to fungus|abscisic acid-activated signaling pathway|metal ion binding|defense response to fungus
LOC18774313	446.329	611.279	281.38	0.460313	-1.11931	1.68606e-07	3.88399e-06	Down	14.298	10.2185	13.3107	5.51584	5.53362	6.00728	GeneID:18774313	Phosphatidylinositol:ceramide inositolphosphotransferase 3	GO:0005802,GO:0005887,GO:0030148,GO:0030173,GO:0030176,GO:0033188,GO:0045140,GO:0046513,GO:0047493	trans-Golgi network|integral component of plasma membrane|sphingolipid biosynthetic process|integral component of Golgi membrane|integral component of endoplasmic reticulum membrane|sphingomyelin synthase activity|inositol phosphoceramide synthase activity|ceramide biosynthetic process|ceramide cholinephosphotransferase activity
LOC18774342	172.526	96.195	248.858	2.58701	1.37129	3.11127e-07	6.6013e-06	Up	2.05534	2.05608	2.03151	5.35336	4.54348	5.6678	GeneID:18774342	Protein NUCLEAR FUSION DEFECTIVE 4	GO:0000741,GO:0005739,GO:0009651,GO:0010197,GO:0016021	karyogamy|mitochondrion|response to salt stress|polar nucleus fusion|integral component of membrane
LOC18774347	648.979	423.796	874.162	2.06269	1.04453	0.000468803	0.00411139	Up	22.8476	29.042	22.885	48.543	62.4947	39.2629	GeneID:18774347
LOC18774365	62.4504	25.1781	99.7228	3.96069	1.98575	4.61283e-07	9.4251e-06	Up	0.779514	0.336512	1.25944	2.70945	2.64666	3.90646	GeneID:18774365	Cytochrome P450 714A1	GO:0004497,GO:0005506,GO:0005789,GO:0016021,GO:0016705,GO:0020037	monooxygenase activity|iron ion binding|endoplasmic reticulum membrane|integral component of membrane|oxidoreductase activity, acting on paired donors, with incorporation or reduction of molecular oxygen|heme binding
LOC18774373	1627.64	1037.26	2218.02	2.13834	1.09649	2.11643e-07	4.71093e-06	Up	41.5766	28.8331	38.0404	64.3412	83.0618	79.2217	GeneID:18774373
LOC18774382	295.06	402.213	187.907	0.467182	-1.09794	0.00259627	0.0172986	Down	18.3975	26.8447	14.6503	6.62616	10.2566	10.2627	GeneID:18774382	Superoxide dismutase [Mn], mitochondrial	GO:0004784,GO:0005759,GO:0046872	superoxide dismutase activity|mitochondrial matrix|metal ion binding	ko04146,ko04013,ko04068	Peroxisome|MAPK signaling pathway - fly|FoxO signaling pathway
LOC18774399	573.755	818.857	328.653	0.401355	-1.31705	9.31797e-05	0.00103154	Down	8.80219	7.03536	4.90271	2.98901	2.57174	2.58298	GeneID:18774399	DNA topoisomerase 6 subunit A	GO:0000228,GO:0000287,GO:0000706,GO:0000737,GO:0003677,GO:0003918,GO:0005524,GO:0005634,GO:0006265,GO:0007131,GO:0009330,GO:0009957,GO:0016889,GO:0042138,GO:0042802	nuclear chromosome|magnesium ion binding|meiotic DNA double-strand break processing|DNA catabolic process, endonucleolytic|DNA binding|DNA topoisomerase type II (ATP-hydrolyzing) activity|ATP binding|nucleus|DNA topological change|reciprocal meiotic recombination|DNA topoisomerase complex (ATP-hydrolyzing)|epidermal cell fate specification|endodeoxyribonuclease activity, producing 3'-phosphomonoe…	ko04014	Ras signaling pathway
LOC18774430	68.5341	29.9804	107.088	3.57193	1.8367	1.2844e-06	2.35319e-05	Up	0.391191	0.342136	0.328658	1.16828	0.939111	1.60656	GeneID:18774430	L-type lectin-domain containing receptor kinase IV.1
LOC18774443	24.9135	11.2086	38.6183	3.44541	1.78467	0.005207	0.0302331	Up	0.339195	0.299957	0.166235	0.615533	1.32279	0.748291	GeneID:18774443	Probable xyloglucan galactosyltransferase GT17	GO:0000139,GO:0006486,GO:0016021,GO:0016757	Golgi membrane|protein glycosylation|integral component of membrane|transferase activity, transferring glycosyl groups
LOC18774446	603.551	45.2318	1161.87	25.687	4.68297	9.27172e-83	1.79213e-79	Up	0.790026	0.883629	0.510568	16.4925	19.035	19.1044	GeneID:18774446	Disease resistance protein RPM1
LOC18774449	341.091	220.934	461.247	2.08772	1.06193	0.00016596	0.00169907	Up	4.41524	4.30345	6.62072	8.77763	9.78906	12.7888	GeneID:18774449	Serine/threonine-protein kinase BSK5	GO:0004674,GO:0005524,GO:0005886,GO:0009409,GO:0009506,GO:0009651,GO:0009737,GO:0009742	protein serine/threonine kinase activity|ATP binding|plasma membrane|response to cold|plasmodesma|response to salt stress|response to abscisic acid|brassinosteroid mediated signaling pathway
LOC18774455	16.2032	3.58097	28.8254	8.0496	3.00892	0.000137315	0.00144563	Up	0.0414711	0.0846316	0.108881	0.632159	0.683669	0.536065	GeneID:18774455	LysM domain receptor-like kinase 4
LOC18774459	157.046	291.485	22.607	0.0775582	-3.68858	4.31575e-21	6.1792e-19	Down	12.887	11.3071	8.55154	0.231289	0.225929	2.01361	GeneID:18774459	Peroxidase 17	GO:0004601,GO:0005576,GO:0005773,GO:0005829,GO:0006979,GO:0009505,GO:0009809,GO:0010228,GO:0020037,GO:0042744,GO:0046872	peroxidase activity|extracellular region|vacuole|cytosol|response to oxidative stress|plant-type cell wall|lignin biosynthetic process|vegetative to reproductive phase transition of meristem|heme binding|hydrogen peroxide catabolic process|metal ion binding	ko00940	Phenylpropanoid biosynthesis
LOC18774473	412.414	271.38	553.448	2.03938	1.02813	1.73759e-06	3.09079e-05	Up	7.8738	7.25343	6.11746	13.3299	14.2286	14.7531	GeneID:18774473	D-xylose-proton symporter-like 3, chloroplastic	GO:0005351,GO:0005355,GO:0005887,GO:0008645,GO:0009507,GO:0009941,GO:0031969	carbohydrate:proton symporter activity|glucose transmembrane transporter activity|integral component of plasma membrane|hexose transmembrane transport|chloroplast|chloroplast envelope|chloroplast membrane
LOC18774497	220.184	345.174	95.1936	0.275785	-1.85839	6.00615e-06	9.52362e-05	Down	5.2578	5.62407	3.05425	0.981782	1.02656	1.73356	GeneID:18774497	Ribosomal RNA-processing protein 12	GO:0000462,GO:0003723,GO:0005634,GO:0005730,GO:0005840,GO:0030688,GO:0042254	maturation of SSU-rRNA from tricistronic rRNA transcript (SSU-rRNA, 5.8S rRNA, LSU-rRNA)|RNA binding|nucleus|nucleolus|ribosome|preribosome, small subunit precursor|ribosome biogenesis
LOC18774509	6.4183	0.316249	12.5203	39.5902	5.30707	0.00283407	0.018538	Up	0.0484225	0	0	0.949015	0.103002	0.851253	GeneID:18774509
LOC18774515	13.2311	2.59107	23.8711	9.21281	3.20364	0.00336298	0.0213612	Up	0.0619785	0.0948613	0.0976332	0.742312	1.2195	0.320459	GeneID:18774515	Protein SRG1	GO:0010150,GO:0016682,GO:0046872,GO:0051213	leaf senescence|oxidoreductase activity, acting on diphenols and related substances as donors, oxygen as acceptor|metal ion binding|dioxygenase activity
LOC18774523	318.157	190.289	446.025	2.34393	1.22893	6.01776e-08	1.52447e-06	Up	3.97065	5.6079	5.0344	12.2581	10.017	11.2666	GeneID:18774523	Inositol-3-phosphate synthase	GO:0004512,GO:0005737,GO:0006021,GO:0008654	inositol-3-phosphate synthase activity|cytoplasm|inositol biosynthetic process|phospholipid biosynthetic process	ko00562,ko00521	Inositol phosphate metabolism|Streptomycin biosynthesis
LOC18774527	1191.1	434.64	1947.56	4.48085	2.16377	2.12928e-08	5.95614e-07	Up	13.5779	17.5024	21.2491	60.9986	96.1124	71.463	GeneID:18774527	WRKY DNA-binding transcription factor 70	GO:0002215,GO:0003700,GO:0005634,GO:0009624,GO:0009625,GO:0009751,GO:0009753,GO:0043565,GO:2000068	defense response to nematode|DNA-binding transcription factor activity|nucleus|response to nematode|response to insect|response to salicylic acid|response to jasmonic acid|sequence-specific DNA binding|regulation of defense response to insect
LOC18774528	58.8898	96.5242	21.2554	0.220208	-2.18306	3.16845e-06	5.31623e-05	Down	3.04698	4.23175	5.64425	0.691165	1.03522	1.05029	GeneID:18774528
LOC18774541	197.219	305.111	89.3261	0.292766	-1.77218	1.04138e-06	1.94482e-05	Down	8.06288	10.047	5.59368	2.31445	2.65061	1.79389	GeneID:18774541	Cyclic nucleotide-gated ion channel 1	GO:0005216,GO:0005516,GO:0005886,GO:0016021,GO:0030552,GO:0030553	ion channel activity|calmodulin binding|plasma membrane|integral component of membrane|cAMP binding|cGMP binding
LOC18774545	303.65	184.87	422.431	2.28502	1.19221	2.30866e-07	5.07092e-06	Up	7.83847	8.18158	5.0977	16.0905	13.6143	17.4385	GeneID:18774545	8-hydroxygeraniol dehydrogenase	GO:0008270,GO:0102311	zinc ion binding|8-hydroxygeraniol dehydrogenase activity	ko00940	Phenylpropanoid biosynthesis
LOC18774560	77.5071	0	155.014	Inf	Inf	6.66224e-40	2.57549e-37	Up	0	0	0	5.70786	5.9057	4.9574	GeneID:18774560	60S ribosomal protein L18 (Fragment)	GO:0003735,GO:0005840,GO:0006412	structural constituent of ribosome|ribosome|translation
LOC18774572	30.2779	60.2164	0.339503	0.00563805	-7.47059	3.16075e-07	6.69158e-06	Down	2.68878	2.31677	0.721615	0.0325286	0	0	GeneID:18774572	DEAD-box ATP-dependent RNA helicase 27	GO:0003723,GO:0004386,GO:0005524	RNA binding|helicase activity|ATP binding
LOC18774579	34.1475	5.41305	62.882	11.6167	3.53813	1.01349e-09	3.59445e-08	Up	0.0883632	0.247948	0.0463988	1.20264	1.76214	1.32496	GeneID:18774579	Receptor-like protein 54	GO:0005886,GO:0016021	plasma membrane|integral component of membrane
LOC18774584	178.496	268.906	88.0862	0.327573	-1.61011	2.23956e-09	7.45069e-08	Down	11.0903	11.4778	11.1893	3.88132	2.86459	4.09587	GeneID:18774584	Peroxidase 15	GO:0004601,GO:0005576,GO:0006979,GO:0020037,GO:0042744,GO:0046872	peroxidase activity|extracellular region|response to oxidative stress|heme binding|hydrogen peroxide catabolic process|metal ion binding	ko00940	Phenylpropanoid biosynthesis
LOC18774589	46.1901	6.53118	85.8489	13.1445	3.71639	3.99858e-07	8.3285e-06	Up	0.189291	0.128764	0.331317	2.47323	3.9594	1.92483	GeneID:18774589	Beta-glucosidase 13	GO:0005975,GO:0008422,GO:0102483	carbohydrate metabolic process|beta-glucosidase activity|scopolin beta-glucosidase activity	ko00940,ko00460,ko00500	Phenylpropanoid biosynthesis|Cyanoamino acid metabolism|Starch and sucrose metabolism
LOC18774603	356.784	33.158	680.411	20.5203	4.35898	2.91697e-18	3.06425e-16	Up	0.770024	1.03714	1.42325	15.5945	25.3229	23.7292	GeneID:18774603	UPF0481 protein At3g47200	GO:0005886,GO:0016021	plasma membrane|integral component of membrane
LOC18774623	122.622	164.158	81.0861	0.493951	-1.01756	0.000665122	0.00556543	Down	7.67583	7.63879	9.30502	4.79785	3.52758	3.6258	GeneID:18774623	Gamma-interferon-responsive lysosomal thiol protein	GO:0005576,GO:0005764	extracellular region|lysosome
LOC18774639	200.9	290.761	111.039	0.381891	-1.38877	6.56136e-08	1.64921e-06	Down	14.1657	13.067	13.1725	5.58696	5.08431	4.44452	GeneID:18774639
LOC18774710	200.61	288.706	112.514	0.389718	-1.3595	8.96652e-07	1.69417e-05	Down	5.24601	5.35286	7.27718	2.74939	2.37338	1.72058	GeneID:18774710	Mediator of RNA polymerase II transcription subunit 15a	GO:0003713,GO:0005634,GO:0009751,GO:0016592,GO:0031490,GO:0045723	transcription coactivator activity|nucleus|response to salicylic acid|mediator complex|chromatin DNA binding|positive regulation of fatty acid biosynthetic process
LOC18774726	61.2041	32.6126	89.7957	2.75341	1.46122	0.000184005	0.00185241	Up	2.47665	2.52709	2.52443	7.77256	5.2682	7.30666	GeneID:18774726	Chaperone protein dnaJ 20, chloroplastic	GO:0005634,GO:0009507,GO:0010322,GO:0061077,GO:1902395	nucleus|chloroplast|regulation of isopentenyl diphosphate biosynthetic process, methylerythritol 4-phosphate pathway|chaperone-mediated protein folding|regulation of 1-deoxy-D-xylulose-5-phosphate synthase activity
LOC18774731	100.6	66.0639	135.137	2.04554	1.03248	0.00125729	0.00950758	Up	2.10536	2.84122	2.17535	5.39809	4.98405	3.86268	GeneID:18774731	UDP-glycosyltransferase 86A1	GO:0008194,GO:0043231,GO:0080043,GO:0080044	UDP-glycosyltransferase activity|intracellular membrane-bounded organelle|quercetin 3-O-glucosyltransferase activity|quercetin 7-O-glucosyltransferase activity
LOC18774734	340.865	521.171	160.559	0.308073	-1.69866	8.08587e-14	5.15814e-12	Down	5.87001	6.09466	5.06146	1.92862	1.61009	1.59741	GeneID:18774734	Pentatricopeptide repeat-containing protein At2g38420, mitochondrial
LOC18774757	536.856	291.621	782.091	2.68187	1.42324	0.00726271	0.0396109	Up	8.6524	16.1779	18.3697	23.0683	51.335	38.1112	GeneID:18774757	NAC domain-containing protein 90	GO:0003677,GO:0003700,GO:0005634	DNA binding|DNA-binding transcription factor activity|nucleus
LOC18774777	19.6393	0.632498	38.6461	61.1007	5.93312	9.12911e-05	0.00101645	Up	0.147379	0	0	0.962809	3.13498	4.64834	GeneID:18774777
LOC18774794	221.023	87.4223	354.623	4.05644	2.02021	0.00855288	0.0450092	Up	6.5819	2.66218	7.09902	34.1536	9.45993	22.3199	GeneID:18774794	Protein DOWNSTREAM OF FLC	GO:0005615	extracellular space
LOC18774820	145.04	206.165	83.9145	0.407027	-1.2968	0.00198666	0.0139586	Down	10.0901	7.87526	5.20528	2.38999	2.48521	4.32011	GeneID:18774820
LOC18774834	3677.08	4946.95	2407.21	0.486604	-1.03918	2.5145e-09	8.33668e-08	Down	307.964	296.103	349.113	136.379	148.689	168.547	GeneID:18774834
LOC18774845	13632.7	21319.6	5945.79	0.278889	-1.84224	0.000239397	0.00231231	Down	1384.4	1232.43	2272.27	428.876	355.512	555.593	GeneID:18774845	Pathogenesis-related protein PR-4B	GO:0005576,GO:0005618,GO:0042742,GO:0050832	extracellular region|cell wall|defense response to bacterium|defense response to fungus
LOC18774853	3093.28	4281.55	1905.01	0.444934	-1.16834	0.000207575	0.00205019	Down	83.9041	89.7321	120.32	29.8454	57.8688	39.6121	GeneID:18774853	L-ascorbate oxidase	GO:0005507,GO:0005576,GO:0008447	copper ion binding|extracellular region|L-ascorbate oxidase activity
LOC18774886	689.083	362.706	1015.46	2.79968	1.48526	1.10843e-13	6.91126e-12	Up	6.78862	8.40437	6.45784	19.2876	21.3206	18.5323	GeneID:18774886	Scarecrow-like protein 14	GO:0003700,GO:0005634,GO:0005829,GO:0006355,GO:0009410,GO:0010200,GO:0043565,GO:0045893	DNA-binding transcription factor activity|nucleus|cytosol|regulation of transcription, DNA-templated|response to xenobiotic stimulus|response to chitin|sequence-specific DNA binding|positive regulation of transcription, DNA-templated
LOC18774889	1460.66	929.385	1991.93	2.14328	1.09982	2.02401e-09	6.81569e-08	Up	61.124	68.7518	45.9851	114.878	124.064	128.573	GeneID:18774889	Histone H2B	GO:0000786,GO:0003677,GO:0005634,GO:0046982	nucleosome|DNA binding|nucleus|protein heterodimerization activity
LOC18774914	157.666	228.212	87.1204	0.381752	-1.38929	0.00010585	0.00115332	Down	11.5854	9.19438	14.9225	4.31258	5.89768	3.1231	GeneID:18774914	Methylesterase 17	GO:0016788,GO:0033473,GO:0048367,GO:0080030	hydrolase activity, acting on ester bonds|indoleacetic acid conjugate metabolic process|shoot system development|methyl indole-3-acetate esterase activity
LOC18774930	7.37438	1.32737	13.4214	10.1112	3.33789	0.00624344	0.0349897	Up	0.0326244	0	0.102785	0.710438	0.520479	0.134948	GeneID:18774930	GDSL esterase/lipase At2g30310	GO:0005576,GO:0016042,GO:0016788	extracellular region|lipid catabolic process|hydrolase activity, acting on ester bonds
LOC18774953	27.5257	49.58	5.47138	0.110355	-3.17978	2.10161e-05	0.000286879	Down	4.43445	1.89095	4.03143	0.936832	0.211181	0	GeneID:18774953
LOC18774998	1528.11	599.907	2456.31	4.09449	2.03368	1.04837e-05	0.000154568	Up	35.5363	28.1793	64.3319	114.013	192.793	205.859	GeneID:18774998	Zinc finger protein ZAT5	GO:0003700,GO:0005634,GO:0006355,GO:0043565,GO:0046872	DNA-binding transcription factor activity|nucleus|regulation of transcription, DNA-templated|sequence-specific DNA binding|metal ion binding
LOC18775003	5543.07	2059.27	9026.86	4.38352	2.13209	3.00291e-11	1.3374e-09	Up	59.9052	69.1199	69.923	227.841	338.769	283.037	GeneID:18775003	E3 ubiquitin-protein ligase RDUF2	GO:0004842,GO:0005737,GO:0005829,GO:0009414,GO:0009737,GO:0009738,GO:0010200,GO:0016567,GO:0046872,GO:0051865,GO:0061630	ubiquitin-protein transferase activity|cytoplasm|cytosol|response to water deprivation|response to abscisic acid|abscisic acid-activated signaling pathway|response to chitin|protein ubiquitination|metal ion binding|protein autoubiquitination|ubiquitin protein ligase activity
LOC18775031	2480.16	1549.77	3410.55	2.20069	1.13795	8.69815e-05	0.000972955	Up	28.8206	36.0443	28.9449	71.5661	48.5457	82.1122	GeneID:18775031	Pyruvate decarboxylase 4	GO:0000287,GO:0004737,GO:0005622,GO:0005829,GO:0016831,GO:0030976	magnesium ion binding|pyruvate decarboxylase activity|intracellular|cytosol|carboxy-lyase activity|thiamine pyrophosphate binding	ko00010	Glycolysis / Gluconeogenesis
LOC18775037	15.3355	2.21288	28.4581	12.8602	3.68485	2.03567e-05	0.000279655	Up	0.112016	0.045719	0	0.487857	0.738652	0.741347	GeneID:18775037	L-type lectin-domain containing receptor kinase IX.1
LOC18775047	126.18	0	252.361	Inf	Inf	2.12874e-33	6.23431e-31	Up	0	0	0	17.4902	13.1921	22.4287	GeneID:18775047	Protein PHLOEM PROTEIN 2-LIKE A1	GO:0009625,GO:0030246,GO:0043394	response to insect|carbohydrate binding|proteoglycan binding
LOC18775055	197.937	99.5061	296.367	2.97838	1.57453	1.2972e-05	0.000187677	Up	2.45583	2.18731	1.92338	8.22577	4.33852	6.67176	GeneID:18775055
LOC18775060	113.725	63.3667	164.083	2.58942	1.37263	7.30795e-06	0.000112914	Up	1.02854	1.39932	1.86777	3.80294	3.62364	3.47889	GeneID:18775060	Squalene monooxygenase	GO:0004506,GO:0016021,GO:0050660	squalene monooxygenase activity|integral component of membrane|flavin adenine dinucleotide binding	ko00909,ko00100	Sesquiterpenoid and triterpenoid biosynthesis|Steroid biosynthesis
LOC18775062	1349.75	1863.18	836.322	0.448868	-1.15564	3.09097e-05	0.000399101	Down	40.675	60.7155	62.1115	22.2492	20.7028	28.8335	GeneID:18775062	Calcium uniporter protein 6, mitochondrial	GO:0005262,GO:0005739,GO:0005743,GO:0015292,GO:0016021,GO:0051560	calcium channel activity|mitochondrion|mitochondrial inner membrane|uniporter activity|integral component of membrane|mitochondrial calcium ion homeostasis
LOC18775064	41.7524	15.9298	67.575	4.24204	2.08476	1.00678e-05	0.000149234	Up	0.938859	0.319327	0.985974	2.87201	2.52015	3.97596	GeneID:18775064	Probable glutathione S-transferase	GO:0004364,GO:0005737,GO:0006749,GO:0009408,GO:0009733,GO:0009735,GO:0009737,GO:0009739,GO:0010038	glutathione transferase activity|cytoplasm|glutathione metabolic process|response to heat|response to auxin|response to cytokinin|response to abscisic acid|response to gibberellin|response to metal ion	ko00982,ko00480,ko00980	Drug metabolism - cytochrome P450|Glutathione metabolism|Metabolism of xenobiotics by cytochrome P450
LOC18775100	299.825	129.664	469.987	3.62466	1.85785	2.6955e-15	2.03521e-13	Up	5.66201	7.20842	8.45554	26.0734	25.2481	24.3872	GeneID:18775100	Cytochrome c-type biogenesis CcmH-like mitochondrial protein	GO:0005743,GO:0009793,GO:0016021,GO:0016491,GO:0017004,GO:0046872	mitochondrial inner membrane|embryo development ending in seed dormancy|integral component of membrane|oxidoreductase activity|cytochrome complex assembly|metal ion binding
LOC18775106	93.0625	51.8843	134.241	2.58731	1.37145	0.00181757	0.0130263	Up	1.00265	1.63361	0.0509499	2.48273	2.16718	2.0904	GeneID:18775106
LOC18775116	902.643	592.47	1212.82	2.04705	1.03355	5.34897e-08	1.37122e-06	Up	30.6814	40.6167	35.8744	73.0839	65.1427	76.3702	GeneID:18775116
LOC18775139	9.52182	2.63266	16.411	6.23362	2.64007	0.00854211	0.0450015	Up	0	0.21675	0.371806	1.61902	0.979024	1.02511	GeneID:18775139
LOC18775147	56.7523	79.6145	33.8902	0.425678	-1.23216	0.00216534	0.0149168	Down	1.55772	1.60793	1.40763	0.709981	0.597203	0.599381	GeneID:18775147	Phosphoglycerate kinase 1, chloroplastic	GO:0004618,GO:0004672,GO:0005524,GO:0005618,GO:0005634,GO:0005737,GO:0005739,GO:0005829,GO:0006094,GO:0006096,GO:0009409,GO:0009507,GO:0009570,GO:0009579,GO:0009941,GO:0010319,GO:0016020,GO:0019253,GO:0043531,GO:0046686,GO:0048046,GO:0050691	phosphoglycerate kinase activity|protein kinase activity|ATP binding|cell wall|nucleus|cytoplasm|mitochondrion|cytosol|gluconeogenesis|glycolytic process|response to cold|chloroplast|chloroplast stroma|thylakoid|chloroplast envelope|stromule|membrane|reductive pentose-phosphate cycle|ADP binding|response to cadmium ion|apoplast|regulation of defense response to virus by host
LOC18775152	352.934	671.653	34.2154	0.050942	-4.295	8.81069e-06	0.000133257	Down	25.1243	8.99404	29.3134	1.37105	0.924735	0.899105	GeneID:18775152	Beta-glucosidase 12	GO:0005576,GO:0005975,GO:0008422,GO:0102483	extracellular region|carbohydrate metabolic process|beta-glucosidase activity|scopolin beta-glucosidase activity	ko00940,ko00460,ko00500	Phenylpropanoid biosynthesis|Cyanoamino acid metabolism|Starch and sucrose metabolism
LOC18775166	1568.81	2266.2	871.424	0.38453	-1.37883	7.91582e-09	2.3982e-07	Down	41.062	56.9546	56.4955	19.8836	14.8702	23.4665	GeneID:18775166	Phosphoenolpyruvate carboxykinase (ATP)	GO:0004612,GO:0005524,GO:0005634,GO:0005730,GO:0005829,GO:0006094,GO:0009817,GO:0016020,GO:0016036,GO:0046686	phosphoenolpyruvate carboxykinase (ATP) activity|ATP binding|nucleus|nucleolus|cytosol|gluconeogenesis|defense response to fungus, incompatible interaction|membrane|cellular response to phosphate starvation|response to cadmium ion	ko00710,ko00020,ko01200,ko00620,ko00010	Carbon fixation in photosynthetic organisms|Citrate cycle (TCA cycle)|Carbon metabolism|Pyruvate metabolism|Glycolysis / Gluconeogenesis
LOC18775207	3.93429	0	7.86858	Inf	Inf	0.0061449	0.0345577	Up	0	0	0	0.515897	0.440948	0.489973	GeneID:18775207	NADPH-dependent 1-acyldihydroxyacetone phosphate reductase	GO:0000140,GO:0000329,GO:0004806,GO:0005737,GO:0005739,GO:0005783,GO:0005794,GO:0005811,GO:0006654,GO:0019433,GO:0102566	acylglycerone-phosphate reductase activity|fungal-type vacuole membrane|triglyceride lipase activity|cytoplasm|mitochondrion|endoplasmic reticulum|Golgi apparatus|lipid droplet|phosphatidic acid biosynthetic process|triglyceride catabolic process|1-acyl dihydroxyacetone phosphate reductase activity
LOC18775220	377.098	244.086	510.11	2.08988	1.06342	0.000727374	0.00602116	Up	5.08157	5.62381	4.43346	9.40588	13.0958	8.30669	GeneID:18775220	Putative receptor protein kinase ZmPK1	GO:0004674,GO:0005524,GO:0005886,GO:0006468,GO:0016021,GO:0048544	protein serine/threonine kinase activity|ATP binding|plasma membrane|protein phosphorylation|integral component of membrane|recognition of pollen
LOC18775263	71.9602	100.866	43.0548	0.426853	-1.22819	0.000734009	0.0060631	Down	4.22138	5.75737	3.42368	1.86582	1.60031	2.11783	GeneID:18775263	Probable WRKY transcription factor 13	GO:0000978,GO:0003700,GO:0005634,GO:0044212,GO:0045893,GO:1901141,GO:1904369	RNA polymerase II proximal promoter sequence-specific DNA binding|DNA-binding transcription factor activity|nucleus|transcription regulatory region DNA binding|positive regulation of transcription, DNA-templated|regulation of lignin biosynthetic process|positive regulation of sclerenchyma cell differentiation
LOC18775264	55.6589	16.282	95.0357	5.83685	2.54519	3.20871e-09	1.05249e-07	Up	0.24645	0.718487	0.850403	3.7184	3.74456	2.91262	GeneID:18775264
LOC18775272	1280.67	522.64	2038.71	3.90079	1.96377	5.85148e-23	9.75028e-21	Up	15.4458	16.6217	14.5664	51.28	63.6167	62.4936	GeneID:18775272	Zinc finger CCCH domain-containing protein 1	GO:0003677,GO:0005684,GO:0034247,GO:0046872	DNA binding|U2-type spliceosomal complex|snoRNA splicing|metal ion binding
LOC18775282	1247.63	772.907	1722.35	2.2284	1.15601	4.13095e-10	1.55345e-08	Up	22.2973	22.3248	23.6211	44.0637	53.5659	50.8708	GeneID:18775282	CBL-interacting serine/threonine-protein kinase 14	GO:0004674,GO:0005524,GO:0005634,GO:0005737,GO:0005773,GO:0006979,GO:0007165,GO:0009408,GO:0009409,GO:0009414,GO:0009506,GO:0009651,GO:0009737,GO:0009749,GO:0019900	protein serine/threonine kinase activity|ATP binding|nucleus|cytoplasm|vacuole|response to oxidative stress|signal transduction|response to heat|response to cold|response to water deprivation|plasmodesma|response to salt stress|response to abscisic acid|response to glucose|kinase binding	ko04113	Meiosis - yeast
LOC18775315	84.6083	30.151	139.066	4.6123	2.20549	5.31412e-10	1.96399e-08	Up	0.514916	0.284002	0.526142	1.86377	1.74657	2.38894	GeneID:18775315	Phospholipase D zeta 1	GO:0004630,GO:0006654,GO:0008610,GO:0016042,GO:0031410,GO:0048017,GO:0048364,GO:0070290	phospholipase D activity|phosphatidic acid biosynthetic process|lipid biosynthetic process|lipid catabolic process|cytoplasmic vesicle|inositol lipid-mediated signaling|root development|N-acylphosphatidylethanolamine-specific phospholipase D activity	ko00564,ko04024,ko04144,ko00565,ko04072,ko04014,ko04071	Glycerophospholipid metabolism|cAMP signaling pathway|Endocytosis|Ether lipid metabolism|Phospholipase D signaling pathway|Ras signaling pathway|Sphingolipid signaling pathway
LOC18775323	1011.07	1473.15	548.986	0.372662	-1.42406	2.28173e-12	1.18933e-10	Down	51.7579	42.0008	55.8727	18.4586	19.3968	16.7674	GeneID:18775323	Acid phosphatase 1	GO:0003993	acid phosphatase activity
LOC18775324	262.925	397.911	127.939	0.321527	-1.63699	1.18151e-11	5.61115e-10	Down	8.41668	9.93704	9.44067	3.31062	3.06985	2.36959	GeneID:18775324	Receptor-like cytosolic serine/threonine-protein kinase RBK2
LOC18775346	104.483	165.291	43.6739	0.264224	-1.92017	0.00257865	0.017199	Down	6.66709	3.49239	8.42447	0.582289	1.47886	2.72828	GeneID:18775346	WAT1-related protein At2g37460	GO:0005886,GO:0016021,GO:0022857	plasma membrane|integral component of membrane|transmembrane transporter activity
LOC18775372	55.294	4.23513	106.353	25.1121	4.65031	1.33373e-19	1.60122e-17	Up	0.086516	0.0353113	0.109029	2.01587	2.06117	1.62828	GeneID:18775372	Scarecrow-like protein 14	GO:0003700,GO:0005634,GO:0005829,GO:0006355,GO:0009410,GO:0010200,GO:0043565,GO:0045893	DNA-binding transcription factor activity|nucleus|cytosol|regulation of transcription, DNA-templated|response to xenobiotic stimulus|response to chitin|sequence-specific DNA binding|positive regulation of transcription, DNA-templated
LOC18775380	95.3803	140.241	50.5195	0.360234	-1.473	0.000806416	0.00655201	Down	3.02318	3.43964	5.3945	1.42736	1.10973	1.65996	GeneID:18775380	Probable protein phosphatase 2C 65	GO:0004722,GO:0046872	protein serine/threonine phosphatase activity|metal ion binding
LOC18775384	1811.51	2519.11	1103.91	0.438213	-1.1903	2.26076e-08	6.2973e-07	Down	97.6902	72.7568	80.1278	39.3658	40.2909	27.8702	GeneID:18775384	Galactinol synthase 2	GO:0005737,GO:0006012,GO:0046872,GO:0047216	cytoplasm|galactose metabolic process|metal ion binding|inositol 3-alpha-galactosyltransferase activity	ko00052	Galactose metabolism
LOC18775402	632.493	910.125	354.861	0.389904	-1.35881	1.37356e-11	6.47548e-10	Down	41.8542	37.326	40.5097	12.071	16.8698	16.574	GeneID:18775402	Tropinone reductase homolog At1g07440	GO:0016491	oxidoreductase activity	ko00960	Tropane, piperidine and pyridine alkaloid biosynthesis
LOC18775404	507.425	720.01	294.841	0.409495	-1.28808	3.65029e-05	0.000462666	Down	18.6347	26.8974	30.0861	8.15921	9.7334	12.3439	GeneID:18775404	F-box protein At2g02240	GO:0009793	embryo development ending in seed dormancy
LOC18775415	422.548	575.707	269.388	0.467925	-1.09565	2.04769e-06	3.58188e-05	Down	14.3135	21.3526	16.6552	9.25732	6.78968	7.93364	GeneID:18775415	Peroxidase 4	GO:0004601,GO:0005576,GO:0006979,GO:0020037,GO:0042744,GO:0046872	peroxidase activity|extracellular region|response to oxidative stress|heme binding|hydrogen peroxide catabolic process|metal ion binding	ko00940	Phenylpropanoid biosynthesis
LOC18775422	46.2264	65.5882	26.8645	0.409593	-1.28774	0.00372001	0.02315	Down	3.07853	2.2267	2.78286	1.9942	0.414463	0.886547	GeneID:18775422	E3 ubiquitin-protein ligase PUB24	GO:0004842,GO:0006952	ubiquitin-protein transferase activity|defense response
LOC18775430	34.5454	55.2369	13.8538	0.250808	-1.99535	0.000109028	0.0011846	Down	0.660846	0.76226	1.08628	0.156421	0.35143	0.103993	GeneID:18775430	Probable LRR receptor-like serine/threonine-protein kinase At3g47570
LOC18775456	7.88845	15.7769	0	0	#NAME?	3.59742e-05	0.000457164	Down	0.670291	1.49224	0.89591	0	0	0	GeneID:18775456	Putative germin-like protein 9-2	GO:0005618,GO:0030145,GO:0045735,GO:0048046	cell wall|manganese ion binding|nutrient reservoir activity|apoplast
LOC18775465	467.39	803.808	130.973	0.162941	-2.61758	1.81247e-13	1.08799e-11	Down	32.2068	22.5932	31.9241	3.56615	2.28604	8.00872	GeneID:18775465	Probable 2-oxoglutarate-dependent dioxygenase At3g111800	GO:0009813,GO:0046872,GO:0051213,GO:0120091,GO:2000022	flavonoid biosynthetic process|metal ion binding|dioxygenase activity|jasmonic acid hydrolase|regulation of jasmonic acid mediated signaling pathway
LOC18775495	604.775	952.99	256.56	0.269216	-1.89316	5.15044e-11	2.23213e-09	Down	40.0781	47.5388	29.7556	11.0993	10.1412	9.61966	GeneID:18775495
LOC18775521	475.335	3.03338	947.637	312.403	8.28726	5.11265e-52	2.90654e-49	Up	0	0	0.2683	24.7261	33.6935	24.7165	GeneID:18775521	Probable CCR4-associated factor 1 homolog 11	GO:0000289,GO:0000932,GO:0003723,GO:0004535,GO:0005634,GO:0008408,GO:0017148,GO:0030015,GO:0042742,GO:0043928,GO:0046872	nuclear-transcribed mRNA poly(A) tail shortening|P-body|RNA binding|poly(A)-specific ribonuclease activity|nucleus|3'-5' exonuclease activity|negative regulation of translation|CCR4-NOT core complex|defense response to bacterium|exonucleolytic nuclear-transcribed mRNA catabolic process involved in deadenylation-dependent decay|metal ion binding	ko03018	RNA degradation
LOC18775529	141.856	257.764	25.9465	0.10066	-3.31244	3.69626e-06	6.10119e-05	Down	5.47421	2.93882	7.091	0.456893	0.426017	0.650901	GeneID:18775529	Beta-glucosidase 12	GO:0005576,GO:0005975,GO:0008422,GO:0102483	extracellular region|carbohydrate metabolic process|beta-glucosidase activity|scopolin beta-glucosidase activity	ko00940,ko00460,ko00500	Phenylpropanoid biosynthesis|Cyanoamino acid metabolism|Starch and sucrose metabolism
LOC18775533	109.527	43.4187	175.635	4.04514	2.01619	1.3346e-08	3.87917e-07	Up	0.663381	0.697405	1.39334	3.63337	4.40438	2.88952	GeneID:18775533
LOC18775538	46.7794	65.7559	27.8029	0.42282	-1.24188	0.00456401	0.0272277	Down	1.75394	1.28179	1.89174	0.619366	0.781473	0.637263	GeneID:18775538	Beta-glucosidase 12	GO:0005576,GO:0005975,GO:0008422,GO:0102483	extracellular region|carbohydrate metabolic process|beta-glucosidase activity|scopolin beta-glucosidase activity	ko00940,ko00460,ko00500	Phenylpropanoid biosynthesis|Cyanoamino acid metabolism|Starch and sucrose metabolism
LOC18775575	8.53785	16.0572	1.01851	0.0634301	-3.97869	0.00101536	0.00794571	Down	1.90383	0.791435	0.888611	0.230324	0	0	GeneID:18775575	Photosystem I subunit O	GO:0009507,GO:0009522,GO:0009535,GO:0009579,GO:0009767,GO:0009768,GO:0016021	chloroplast|photosystem I|chloroplast thylakoid membrane|thylakoid|photosynthetic electron transport chain|photosynthesis, light harvesting in photosystem I|integral component of membrane	ko00195	Photosynthesis
LOC18775602	50.0615	72.0029	28.1202	0.390542	-1.35645	0.00143897	0.0106853	Down	3.06502	4.563	3.85204	1.53184	1.54978	1.29899	GeneID:18775602
LOC18775629	40.1056	15.7167	64.4945	4.10357	2.03688	2.68479e-05	0.000353333	Up	0.370061	0.377599	0.224998	1.44206	1.38792	1.06748	GeneID:18775629	Pentatricopeptide repeat-containing protein At3g09650, chloroplastic
LOC18775658	48.1912	0	96.3825	Inf	Inf	1.09602e-26	2.20677e-24	Up	0	0	0	4.77613	3.54393	4.31804	GeneID:18775658	Probable pectate lyase 4	GO:0030570,GO:0045490,GO:0046872	pectate lyase activity|pectin catabolic process|metal ion binding	ko00040,ko02024	Pentose and glucuronate interconversions|Quorum sensing
LOC18775666	841.287	320.59	1361.98	4.24837	2.08691	0.00493674	0.0289498	Up	12.988	4.65334	9.35457	57.1466	16.6502	40.0167	GeneID:18775666	Phosphoethanolamine N-methyltransferase 1	GO:0000234,GO:0005737,GO:0005829,GO:0006656,GO:0008168,GO:0009555,GO:0009826,GO:0009860,GO:0010183,GO:0042425,GO:0048528	phosphoethanolamine N-methyltransferase activity|cytoplasm|cytosol|phosphatidylcholine biosynthetic process|methyltransferase activity|pollen development|unidimensional cell growth|pollen tube growth|pollen tube guidance|choline biosynthetic process|post-embryonic root development	ko00564	Glycerophospholipid metabolism
LOC18775686	350.36	135.461	565.259	4.17285	2.06103	2.81039e-19	3.27241e-17	Up	1.56633	1.80976	1.57236	5.89379	6.76164	7.49129	GeneID:18775686	Pentatricopeptide repeat-containing protein At3g58590
LOC18775691	204.8	97.327	312.274	3.2085	1.6819	0.00205017	0.0142957	Up	3.58339	4.46891	5.57514	10.7416	20.3735	11.437	GeneID:18775691	Protein LURP-one-related 2
LOC18775710	11.4903	3.24566	19.7349	6.08041	2.60417	0.00419882	0.0254577	Up	0.197783	0	0.138472	0.933177	0.350596	0.749933	GeneID:18775710
LOC18775727	1265.04	1759.03	771.046	0.438336	-1.18989	1.2427e-10	5.06754e-09	Down	35.373	32.0453	30.456	14.8706	12.7522	14.3957	GeneID:18775727	Cation/H(+) antiporter 18	GO:0005770,GO:0006813,GO:0006885,GO:0012505,GO:0015299,GO:0016021	late endosome|potassium ion transport|regulation of pH|endomembrane system|solute:proton antiporter activity|integral component of membrane
LOC18775753	89.5942	119.581	59.608	0.498476	-1.00441	0.00249324	0.0167566	Down	5.10884	5.13331	4.5461	3.05729	2.2813	1.89544	GeneID:18775753	RNA-binding protein CP33, chloroplastic	GO:0003723,GO:0003729,GO:0006397,GO:0009507,GO:0009535,GO:0009570,GO:0009579,GO:0031425,GO:1901259,GO:1990904	RNA binding|mRNA binding|mRNA processing|chloroplast|chloroplast thylakoid membrane|chloroplast stroma|thylakoid|chloroplast RNA processing|chloroplast rRNA processing|ribonucleoprotein complex
LOC18775760	77.0752	21.3022	132.848	6.23637	2.64071	0.000555043	0.00476444	Up	1.22114	0.687456	0.92865	3.89708	8.73315	4.57213	GeneID:18775760	Short-chain dehydrogenase TIC 32, chloroplastic	GO:0005516,GO:0009706,GO:0015031,GO:0016491	calmodulin binding|chloroplast inner membrane|protein transport|oxidoreductase activity
LOC18775770	43.3384	1.64276	85.034	51.7629	5.69385	3.27544e-19	3.79107e-17	Up	0	0.0552682	0.0853247	2.24107	2.56358	2.32449	GeneID:18775770	Nucleolar protein 56	GO:0005634,GO:0005730,GO:0005732,GO:0006364,GO:0030515,GO:0030532,GO:0031428,GO:0032040	nucleus|nucleolus|small nucleolar ribonucleoprotein complex|rRNA processing|snoRNA binding|small nuclear ribonucleoprotein complex|box C/D snoRNP complex|small-subunit processome	ko03008	Ribosome biogenesis in eukaryotes
LOC18775789	30.7236	6.04382	55.4033	9.16693	3.19644	6.36803e-08	1.60915e-06	Up	0.0405425	0.310262	0.0425771	0.882863	1.12112	1.46737	GeneID:18775789	Cyclic nucleotide-gated ion channel 1	GO:0005216,GO:0005516,GO:0005886,GO:0016021,GO:0030552,GO:0030553	ion channel activity|calmodulin binding|plasma membrane|integral component of membrane|cAMP binding|cGMP binding
LOC18775828	367.523	611.509	123.538	0.202022	-2.30742	6.61597e-19	7.47836e-17	Down	42.2871	31.1562	38.0564	4.89282	7.53677	9.53221	GeneID:18775828
LOC18775837	419.776	628.035	211.516	0.33679	-1.57008	6.70212e-13	3.79898e-11	Down	17.9354	16.9033	17.5632	5.27636	3.41737	8.60622	GeneID:18775837	Transcription factor bHLH14	GO:0003677,GO:0003700,GO:0005634,GO:0005737,GO:0006355,GO:0010629,GO:0046983	DNA binding|DNA-binding transcription factor activity|nucleus|cytoplasm|regulation of transcription, DNA-templated|negative regulation of gene expression|protein dimerization activity
LOC18775866	166.288	78.7164	253.86	3.22499	1.68929	0.0083865	0.0443025	Up	1.78757	4.03603	3.67466	6.66719	14.8456	8.18068	GeneID:18775866	RING-H2 finger protein ATL22	GO:0016021,GO:0016567,GO:0016740,GO:0046872	integral component of membrane|protein ubiquitination|transferase activity|metal ion binding
LOC18775888	186.409	272.454	100.364	0.368372	-1.44076	4.79497e-08	1.24405e-06	Down	7.57429	9.6533	7.86296	3.47574	2.3149	3.27107	GeneID:18775888	Transcription factor MYC3	GO:0003677,GO:0003700,GO:0005634,GO:0006355,GO:0006952,GO:0009718,GO:0009753,GO:0043425,GO:0045893,GO:0046983	DNA binding|DNA-binding transcription factor activity|nucleus|regulation of transcription, DNA-templated|defense response|anthocyanin-containing compound biosynthetic process|response to jasmonic acid|bHLH transcription factor binding|positive regulation of transcription, DNA-templated|protein dimerization activity
LOC18775897	3633.5	1544.94	5722.05	3.70373	1.88898	2.15449e-09	7.20487e-08	Up	46.6743	43.1641	31.956	145.048	114.263	181.915	GeneID:18775897	6-phosphogluconate dehydrogenase, decarboxylating 3, chloroplastic	GO:0004616,GO:0005739,GO:0005829,GO:0008114,GO:0009051,GO:0009506,GO:0009507,GO:0009536,GO:0009570,GO:0009744,GO:0009749,GO:0009750,GO:0019521,GO:0046686,GO:0050661	phosphogluconate dehydrogenase (decarboxylating) activity|mitochondrion|cytosol|phosphogluconate 2-dehydrogenase activity|pentose-phosphate shunt, oxidative branch|plasmodesma|chloroplast|plastid|chloroplast stroma|response to sucrose|response to glucose|response to fructose|D-gluconate metabolic process|response to cadmium ion|NADP binding	ko01200,ko00480,ko00030	Carbon metabolism|Glutathione metabolism|Pentose phosphate pathway
LOC18775907	3061.2	4646.97	1475.42	0.317502	-1.65516	9.59427e-21	1.36359e-18	Down	107.836	108.226	109.785	46.0209	37.7522	17.8266	GeneID:18775907	Protein NRT1/ PTR FAMILY 7.3	GO:0005886,GO:0010150,GO:0010167,GO:0015112,GO:0015293,GO:0015386,GO:0015706,GO:0016021,GO:0055075,GO:1902600	plasma membrane|leaf senescence|response to nitrate|nitrate transmembrane transporter activity|symporter activity|potassium:proton antiporter activity|nitrate transport|integral component of membrane|potassium ion homeostasis|proton transmembrane transport
LOC18775944	416.937	269.978	563.896	2.08868	1.06259	7.84614e-07	1.51507e-05	Up	18.5182	20.2828	16.6596	36.5892	42.5588	33.8801	GeneID:18775944	(-)-isopiperitenol/(-)-carveol dehydrogenase, mitochondrial	GO:0000166,GO:0005739,GO:0018458,GO:0018459,GO:0031525	nucleotide binding|mitochondrion|isopiperitenol dehydrogenase activity|carveol dehydrogenase activity|menthol biosynthetic process
LOC18775948	207.653	97.0576	318.249	3.27897	1.71324	7.19318e-06	0.000111408	Up	5.42121	5.99261	4.05909	15.8498	21.0348	12.5098	GeneID:18775948	Germin-like protein subfamily T member 2	GO:0005618,GO:0030145,GO:0045735,GO:0048046	cell wall|manganese ion binding|nutrient reservoir activity|apoplast
LOC18775952	190.87	259.234	122.506	0.47257	-1.0814	0.000762085	0.0062709	Down	6.1537	6.09816	8.51031	3.72235	1.85844	4.08523	GeneID:18775952	Serine carboxypeptidase-like 45	GO:0004185,GO:0005576,GO:0005773,GO:0009505,GO:0009506,GO:0051603	serine-type carboxypeptidase activity|extracellular region|vacuole|plant-type cell wall|plasmodesma|proteolysis involved in cellular protein catabolic process
LOC18775953	77.9876	107.842	48.1332	0.44633	-1.16382	0.000882286	0.00708505	Down	10.9407	12.858	9.64317	4.04169	6.12982	4.34367	GeneID:18775953	Beta-carotene hydroxylase 2, chloroplastic (Fragment)	GO:0005506,GO:0016021,GO:0016117,GO:0016491,GO:0016787,GO:0031969	iron ion binding|integral component of membrane|carotenoid biosynthetic process|oxidoreductase activity|hydrolase activity|chloroplast membrane	ko00906	Carotenoid biosynthesis
LOC18775971	5357.39	7590.82	3123.96	0.411544	-1.28088	2.94347e-08	8.04728e-07	Down	212.895	268.487	178.76	79.5229	90.869	94.2953	GeneID:18775971	Glutamate decarboxylase 4	GO:0004351,GO:0005516,GO:0005634,GO:0005829,GO:0006538,GO:0030170	glutamate decarboxylase activity|calmodulin binding|nucleus|cytosol|glutamate catabolic process|pyridoxal phosphate binding	ko00410,ko00430,ko00650,ko00250,ko02024	beta-Alanine metabolism|Taurine and hypotaurine metabolism|Butanoate metabolism|Alanine, aspartate and glutamate metabolism|Quorum sensing
LOC18775990	291.361	154.635	428.087	2.76837	1.46904	8.05848e-05	0.000915173	Up	7.97453	3.00022	10.714	18.3842	16.1575	24.6011	GeneID:18775990	Transcription factor MYB3	GO:0003700,GO:0005634,GO:0009611,GO:0009651,GO:0009737,GO:0009751,GO:0009800,GO:0009892,GO:0030154,GO:0043565,GO:0044212	DNA-binding transcription factor activity|nucleus|response to wounding|response to salt stress|response to abscisic acid|response to salicylic acid|cinnamic acid biosynthetic process|negative regulation of metabolic process|cell differentiation|sequence-specific DNA binding|transcription regulatory region DNA binding
LOC18776019	36.5984	21.345	51.8518	2.42922	1.28049	0.00867994	0.0454304	Up	0.936547	0.414103	0.754052	1.52959	1.95898	1.51729	GeneID:18776019	Cytochrome P450 71A9	GO:0005506,GO:0016020,GO:0016021,GO:0016709,GO:0020037	iron ion binding|membrane|integral component of membrane|oxidoreductase activity, acting on paired donors, with incorporation or reduction of molecular oxygen, NAD(P)H as one donor, and incorporation of one atom of oxygen|heme binding
LOC18776031	609.381	945.9	272.861	0.288467	-1.79352	1.98029e-18	2.15039e-16	Down	30.3199	27.9308	24.3511	9.83484	7.6738	5.86637	GeneID:18776031	Cytochrome P450 71A1	GO:0004497,GO:0005506,GO:0005789,GO:0009835,GO:0016021,GO:0016705,GO:0020037,GO:0031090	monooxygenase activity|iron ion binding|endoplasmic reticulum membrane|fruit ripening|integral component of membrane|oxidoreductase activity, acting on paired donors, with incorporation or reduction of molecular oxygen|heme binding|organelle membrane
LOC18776038	543.466	769.949	316.983	0.411694	-1.28036	5.17175e-08	1.33116e-06	Down	31.3266	41.8728	45.8122	16.1512	15.4136	16.3993	GeneID:18776038
LOC18776043	260.688	361.559	159.816	0.442018	-1.17782	6.25561e-07	1.24015e-05	Down	14.2747	15.5927	11.4037	5.40265	7.26603	5.09398	GeneID:18776043	Protein ODORANT1
LOC18776048	1858.02	1190.64	2525.4	2.12104	1.08477	3.72133e-05	0.000470143	Up	18.6083	38.086	25.8653	50.9731	65.2442	54.1416	GeneID:18776048	Granule-bound starch synthase 1, chloroplastic/amyloplastic	GO:0004373,GO:0009011,GO:0009501,GO:0009507,GO:0019252,GO:0033201	glycogen (starch) synthase activity|starch synthase activity|amyloplast|chloroplast|starch biosynthetic process|alpha-1,4-glucan synthase activity
LOC18776049	4696.48	6481.25	2911.7	0.44925	-1.15441	7.78414e-05	0.000888716	Down	206.25	137.776	205.035	68.8846	72.7315	99.9496	GeneID:18776049	Methionine gamma-lyase	GO:0003962,GO:0004123,GO:0005737,GO:0005829,GO:0009970,GO:0018826,GO:0019343,GO:0019346,GO:0019458,GO:0030170,GO:0042631,GO:0051289,GO:0071266	cystathionine gamma-synthase activity|cystathionine gamma-lyase activity|cytoplasm|cytosol|cellular response to sulfate starvation|methionine gamma-lyase activity|cysteine biosynthetic process via cystathionine|transsulfuration|methionine catabolic process via 2-oxobutanoate|pyridoxal phosphate binding|cellular response to water deprivation|protein homotetramerization|'de novo' L-methionine biosy…	ko00270,ko00450	Cysteine and methionine metabolism|Selenocompound metabolism
LOC18776078	80.85	150.374	11.3264	0.0753216	-3.73079	3.83635e-20	4.94352e-18	Down	3.71979	4.64491	4.04305	0.226582	0.359662	0.322794	GeneID:18776078	F-box/LRR-repeat protein At5g63520
LOC18776087	82.0872	47.4065	116.768	2.46312	1.30049	0.000160049	0.00164728	Up	2.44383	1.40549	2.79979	5.75716	5.1984	5.14622	GeneID:18776087	Ethylene-responsive transcription factor ERN1	GO:0003700,GO:0005634,GO:0009877,GO:0043565,GO:0045893	DNA-binding transcription factor activity|nucleus|nodulation|sequence-specific DNA binding|positive regulation of transcription, DNA-templated
LOC18776109	32.6555	56.2848	9.02612	0.160365	-2.64057	0.00785692	0.0420566	Down	0.833145	1.66874	2.98133	0.100793	0.557923	0.191456	GeneID:18776109	Myb-related protein 306	GO:0003677,GO:0005634	DNA binding|nucleus
LOC18776136	4.79477	0	9.58954	Inf	Inf	0.00189386	0.0134286	Up	0	0	0	0.488505	0.795304	0.927914	GeneID:18776136	RING-H2 finger protein ATL22	GO:0016021,GO:0016567,GO:0016740,GO:0046872	integral component of membrane|protein ubiquitination|transferase activity|metal ion binding
LOC18776200	529.796	323.55	736.041	2.27489	1.1858	8.00347e-09	2.4134e-07	Up	5.83396	4.70723	5.69386	10.2013	13.1348	12.7379	GeneID:18776200	Light-sensor Protein kinase	GO:0000155,GO:0004674,GO:0005524,GO:0005622,GO:0005886,GO:0006355,GO:0009584,GO:0009881,GO:0018298	phosphorelay sensor kinase activity|protein serine/threonine kinase activity|ATP binding|intracellular|plasma membrane|regulation of transcription, DNA-templated|detection of visible light|photoreceptor activity|protein-chromophore linkage
LOC18776204	3423.71	4714.46	2132.96	0.45243	-1.14423	4.06285e-08	1.07282e-06	Down	177.032	144.039	152.108	48.7494	71.6484	88.2414	GeneID:18776204	Bifunctional UDP-glucose 4-epimerase and UDP-xylose 4-epimerase 1	GO:0003978,GO:0005829,GO:0005886,GO:0006012,GO:0033358,GO:0045227,GO:0050373,GO:0071555	UDP-glucose 4-epimerase activity|cytosol|plasma membrane|galactose metabolic process|UDP-L-arabinose biosynthetic process|capsule polysaccharide biosynthetic process|UDP-arabinose 4-epimerase activity|cell wall organization	ko00520,ko00052	Amino sugar and nucleotide sugar metabolism|Galactose metabolism
LOC18776205	96.53	6.44584	186.614	28.9511	4.85555	2.00466e-31	5.38169e-29	Up	0.160641	0.295044	0.202443	7.80091	5.05729	5.81416	GeneID:18776205	Purple acid phosphatase 17	GO:0003993,GO:0004601,GO:0005576,GO:0008198,GO:0008199,GO:0009986,GO:0016791,GO:0030643,GO:0042542	acid phosphatase activity|peroxidase activity|extracellular region|ferrous iron binding|ferric iron binding|cell surface|phosphatase activity|cellular phosphate ion homeostasis|response to hydrogen peroxide	ko04142	Lysosome
LOC18776207	6654.95	3431.11	9878.79	2.87918	1.52566	9.83245e-05	0.00108291	Up	130.782	134.105	173.335	420.688	524.448	288.808	GeneID:18776207	High-affinity nitrate transporter 3.1	GO:0005886,GO:0009611,GO:0010167,GO:0015112,GO:0015706,GO:0016021,GO:0042128	plasma membrane|response to wounding|response to nitrate|nitrate transmembrane transporter activity|nitrate transport|integral component of membrane|nitrate assimilation
LOC18776217	510.607	720.112	301.103	0.418133	-1.25797	1.09108e-09	3.85548e-08	Down	30.8897	35.9716	30.8672	12.2514	16.3357	11.2375	GeneID:18776217	Putative anthocyanidin reductase	GO:0009813,GO:0016491,GO:0050662	flavonoid biosynthetic process|oxidoreductase activity|coenzyme binding
LOC18776229	9.72601	2.29648	17.1555	7.47036	2.90118	0.00427878	0.0258129	Up	0.0823026	0.0419895	0.172866	0.806509	0.787816	0.595763	GeneID:18776229	Cinnamoyl-CoA reductase 2	GO:0006952,GO:0007623,GO:0009409,GO:0009699,GO:0016491,GO:0016616,GO:0016621,GO:0042754,GO:0050662	defense response|circadian rhythm|response to cold|phenylpropanoid biosynthetic process|oxidoreductase activity|oxidoreductase activity, acting on the CH-OH group of donors, NAD or NADP as acceptor|cinnamoyl-CoA reductase activity|negative regulation of circadian rhythm|coenzyme binding
LOC18776233	598.41	77.2482	1119.57	14.4932	3.8573	8.84427e-13	4.9551e-11	Up	3.74764	0.21483	6.23522	44.4267	63.5505	37.6657	GeneID:18776233	Cinnamoyl-CoA reductase 1	GO:0005829,GO:0007623,GO:0009409,GO:0009809,GO:0016491,GO:0016616,GO:0016621,GO:0050662	cytosol|circadian rhythm|response to cold|lignin biosynthetic process|oxidoreductase activity|oxidoreductase activity, acting on the CH-OH group of donors, NAD or NADP as acceptor|cinnamoyl-CoA reductase activity|coenzyme binding
LOC18776235	949.965	499.841	1400.09	2.80107	1.48598	3.74742e-14	2.48061e-12	Up	12.071	13.3692	11.7168	29.757	38.1664	33.5456	GeneID:18776235	ACT domain-containing protein ACR8	GO:0009737,GO:0016597	response to abscisic acid|amino acid binding
LOC18776250	1066.78	508.366	1625.19	3.19689	1.67667	0.000259262	0.0024796	Up	27.204	32.6473	23.3207	60.9792	114.912	82.0506	GeneID:18776250	Germin-like protein subfamily T member 2	GO:0005618,GO:0030145,GO:0045735,GO:0048046	cell wall|manganese ion binding|nutrient reservoir activity|apoplast
LOC18776251	1812.7	745.93	2879.46	3.86023	1.94869	0.000422246	0.00376979	Up	22.4345	28.9748	52.5933	142.763	173.132	77.8187	GeneID:18776251	Probable 2-oxoglutarate-dependent dioxygenase AOP1.2	GO:0046872,GO:0051213	metal ion binding|dioxygenase activity
LOC18776272	687.133	1025.95	348.314	0.339503	-1.5585	6.3645e-15	4.55627e-13	Down	34.1803	25.9652	30.4746	9.53942	10.7131	9.83911	GeneID:18776272	Serine/threonine-protein kinase AtPK2/AtPK19	GO:0004672,GO:0004674,GO:0005524,GO:0005634,GO:0005737,GO:0006468,GO:0009408,GO:0009409,GO:0009651,GO:0016301,GO:0035556,GO:0045727	protein kinase activity|protein serine/threonine kinase activity|ATP binding|nucleus|cytoplasm|protein phosphorylation|response to heat|response to cold|response to salt stress|kinase activity|intracellular signal transduction|positive regulation of translation	ko04066,ko04152,ko04350,ko04012,ko04151,ko04150	HIF-1 signaling pathway|AMPK signaling pathway|TGF-beta signaling pathway|ErbB signaling pathway|PI3K-Akt signaling pathway|mTOR signaling pathway
LOC18776279	773.37	1055.67	491.071	0.465176	-1.10415	4.76713e-05	0.000580251	Down	35.8822	58.9109	51.5903	22.9846	22.6843	20.8805	GeneID:18776279	Protein TORNADO 2	GO:0005886,GO:0009506,GO:0009554,GO:0009734,GO:0009933,GO:0009934,GO:0009956,GO:0010015,GO:0010305,GO:0016021	plasma membrane|plasmodesma|megasporogenesis|auxin-activated signaling pathway|meristem structural organization|regulation of meristem structural organization|radial pattern formation|root morphogenesis|leaf vascular tissue pattern formation|integral component of membrane
LOC18776282	13336.4	1617.38	25055.4	15.4913	3.95339	1.0172e-06	1.90702e-05	Up	119.915	47.7562	120.3	798.694	2030.89	1516.94	GeneID:18776282	Germin-like protein subfamily T member 2	GO:0005618,GO:0030145,GO:0045735,GO:0048046	cell wall|manganese ion binding|nutrient reservoir activity|apoplast
LOC18776285	27.1174	13.4215	40.8133	3.0409	1.6045	0.00421815	0.0255365	Up	0.467574	0.170392	0.771632	0.909108	1.63399	1.65778	GeneID:18776285	L-type lectin-domain containing receptor kinase VIII.2
LOC18776290	143.944	216.343	71.546	0.330707	-1.59638	0.000489241	0.00426162	Down	5.35641	8.58085	4.50017	1.22475	2.64908	2.02175	GeneID:18776290	Protein ROOT INITIATION DEFECTIVE 3	GO:0000027,GO:0005656,GO:0006267,GO:0006364,GO:0030174,GO:0080008,GO:0097344,GO:1902184	ribosomal large subunit assembly|nuclear pre-replicative complex|pre-replicative complex assembly involved in nuclear cell cycle DNA replication|rRNA processing|regulation of DNA-dependent DNA replication initiation|Cul4-RING E3 ubiquitin ligase complex|Rix1 complex|negative regulation of shoot apical meristem development
LOC18776298	37.0152	56.6497	17.3807	0.30681	-1.70458	0.00053297	0.00460618	Down	1.20363	1.43284	0.651169	0.317704	0.232755	0.43375	GeneID:18776298	Tryptophan aminotransferase-related protein 2	GO:0005789,GO:0009723,GO:0009851,GO:0009908,GO:0009958,GO:0010078,GO:0010087,GO:0016021,GO:0016846,GO:0042742,GO:0043562,GO:0048367,GO:0048467,GO:0048527,GO:0050362,GO:0080097	endoplasmic reticulum membrane|response to ethylene|auxin biosynthetic process|flower development|positive gravitropism|maintenance of root meristem identity|phloem or xylem histogenesis|integral component of membrane|carbon-sulfur lyase activity|defense response to bacterium|cellular response to nitrogen levels|shoot system development|gynoecium development|lateral root development|L-tryptophan:…	ko00380	Tryptophan metabolism
LOC18776302	331.269	211.154	451.385	2.13771	1.09607	1.10121e-06	2.04863e-05	Up	4.63154	5.44052	5.05378	11.3403	11.2457	9.04158	GeneID:18776302	Glutamyl-tRNA(Gln) amidotransferase subunit A, chloroplastic/mitochondrial	GO:0004040,GO:0005524,GO:0005739,GO:0009570,GO:0030956,GO:0032543,GO:0050567,GO:0070681	amidase activity|ATP binding|mitochondrion|chloroplast stroma|glutamyl-tRNA(Gln) amidotransferase complex|mitochondrial translation|glutaminyl-tRNA synthase (glutamine-hydrolyzing) activity|glutaminyl-tRNAGln biosynthesis via transamidation
LOC18776314	382.209	191.547	572.872	2.99076	1.58051	9.67019e-13	5.37112e-11	Up	8.66779	9.01121	7.17058	25.2411	23.6125	23.8036	GeneID:18776314	Agamous-like MADS-box protein AGL14	GO:0000977,GO:0000982,GO:0003700,GO:0005634,GO:0005737,GO:0007275,GO:0008134,GO:0009908,GO:0009909,GO:0010048,GO:0010076,GO:0010082,GO:0010228,GO:0043565,GO:0044212,GO:0045944,GO:0046983,GO:2000012	RNA polymerase II regulatory region sequence-specific DNA binding|transcription factor activity, RNA polymerase II proximal promoter sequence-specific DNA binding|DNA-binding transcription factor activity|nucleus|cytoplasm|multicellular organism development|transcription factor binding|flower development|regulation of flower development|vernalization response|maintenance of floral meristem identi…
LOC18776327	43.6779	17.5929	69.763	3.9654	1.98746	1.58011e-05	0.000224079	Up	0.644759	0.346259	0.890941	2.21691	2.2738	2.84244	GeneID:18776327	Uncharacterized protein At4g22758
LOC18776330	551.29	834.865	267.716	0.32067	-1.64084	3.4112e-05	0.000436656	Down	42.8547	35.4061	58.7524	20.9266	12.4859	9.99124	GeneID:18776330	Glutathione S-transferase U10	GO:0004364,GO:0005737,GO:0005829,GO:0006749,GO:0009407	glutathione transferase activity|cytoplasm|cytosol|glutathione metabolic process|toxin catabolic process	ko00982,ko00480,ko00980	Drug metabolism - cytochrome P450|Glutathione metabolism|Metabolism of xenobiotics by cytochrome P450
LOC18776340	269.329	106.925	431.733	4.0377	2.01354	1.26103e-16	1.10793e-14	Up	4.61879	3.42419	4.16846	16.4621	14.8908	16.9782	GeneID:18776340
LOC18776343	5057.17	7090.67	3023.67	0.42643	-1.22962	1.20055e-12	6.51836e-11	Down	91.9989	76.3544	87.0808	29.6693	35.7098	41.0264	GeneID:18776343	Probable alpha,alpha-trehalose-phosphate synthase [UDP-forming] 9	GO:0005737,GO:0005992,GO:0016311,GO:0016757,GO:0070413	cytoplasm|trehalose biosynthetic process|dephosphorylation|transferase activity, transferring glycosyl groups|trehalose metabolism in response to stress	ko00500	Starch and sucrose metabolism
LOC18776363	31.8234	10.9353	52.7115	4.82032	2.26913	3.02603e-05	0.000391609	Up	0.395463	0.269012	0.249185	1.46399	1.37398	1.47221	GeneID:18776363	Endoglucanase 1	GO:0008810,GO:0009835,GO:0030245	cellulase activity|fruit ripening|cellulose catabolic process
LOC18776365	3652.79	4947.04	2358.53	0.476756	-1.06868	8.88257e-10	3.17947e-08	Down	175.752	167.583	203.04	84.8721	85.1316	85.0814	GeneID:18776365	Thioredoxin-like 1-2, chloroplastic	GO:0009507,GO:0045454,GO:0055114	chloroplast|cell redox homeostasis|oxidation-reduction process
LOC18776398	3840.4	2515.94	5164.85	2.05285	1.03763	1.70832e-08	4.87741e-07	Up	142.582	140.998	154.588	269.838	337.39	271.234	GeneID:18776398	Probable phospholipid hydroperoxide glutathione peroxidase	GO:0004602,GO:0005737,GO:0006979,GO:0047066	glutathione peroxidase activity|cytoplasm|response to oxidative stress|phospholipid-hydroperoxide glutathione peroxidase activity	ko00480,ko00590	Glutathione metabolism|Arachidonic acid metabolism
LOC18776406	342.397	213.672	471.121	2.20488	1.1407	2.86875e-07	6.13386e-06	Up	7.82526	7.24032	7.38223	17.1488	12.8015	18.5844	GeneID:18776406	L-lactate dehydrogenase A	GO:0004459,GO:0005737,GO:0005975,GO:0019752	L-lactate dehydrogenase activity|cytoplasm|carbohydrate metabolic process|carboxylic acid metabolic process	ko00640,ko00620,ko00270,ko00010	Propanoate metabolism|Pyruvate metabolism|Cysteine and methionine metabolism|Glycolysis / Gluconeogenesis
LOC18776411	912.708	580.502	1244.91	2.14454	1.10067	0.00385627	0.0238445	Up	9.52082	12.9761	8.85592	16.6232	28.6425	19.9898	GeneID:18776411	Homeobox protein BEL1 homolog	GO:0003677,GO:0003700,GO:0005634,GO:0005829,GO:0009506	DNA binding|DNA-binding transcription factor activity|nucleus|cytosol|plasmodesma
LOC18776433	37.7188	55.4042	20.0335	0.361589	-1.46758	0.00261604	0.0173824	Down	2.19327	3.01262	2.21475	0.964411	0.403739	1.26488	GeneID:18776433	Thylakoid lumenal protein TL20.3, chloroplastic	GO:0009507,GO:0009534,GO:0009535,GO:0009543,GO:0009579	chloroplast|chloroplast thylakoid|chloroplast thylakoid membrane|chloroplast thylakoid lumen|thylakoid
LOC18776493	47.3609	73.04	21.6819	0.29685	-1.7522	7.04323e-05	0.000815689	Down	3.50574	3.98989	2.92646	1.22343	1.24287	0.557736	GeneID:18776493	Protein LOL1	GO:0003677,GO:0005634,GO:0009626,GO:0009814,GO:0034052,GO:0043068,GO:2000121	DNA binding|nucleus|plant-type hypersensitive response|defense response, incompatible interaction|positive regulation of plant-type hypersensitive response|positive regulation of programmed cell death|regulation of removal of superoxide radicals
LOC18776498	8.99917	1.60204	16.3963	10.2347	3.35539	0.00237239	0.0160729	Up	0.237185	0	0.0622721	0.839314	0.882927	1.28768	GeneID:18776498	Dirigent protein 5	GO:0042349,GO:0048046,GO:1901599	guiding stereospecific synthesis activity|apoplast|(-)-pinoresinol biosynthetic process
LOC18776503	100.122	47.6508	152.593	3.20232	1.67912	0.00205327	0.014307	Up	1.76988	2.50499	4.31697	6.52715	12.5696	7.73418	GeneID:18776503	Protein LURP-one-related 11
LOC18776521	136.991	187.464	86.5182	0.461518	-1.11554	9.73052e-05	0.00107392	Down	5.0767	4.85343	3.67439	2.71399	1.70253	1.74994	GeneID:18776521	NAC domain-containing protein 71	GO:0003700,GO:0005634,GO:0008283,GO:0043565,GO:0071365	DNA-binding transcription factor activity|nucleus|cell proliferation|sequence-specific DNA binding|cellular response to auxin stimulus
LOC18776536	13.3945	4.42445	22.3645	5.05475	2.33764	0.00555917	0.0318758	Up	0.203725	0.207874	0	0.475325	0.897662	0.632015	GeneID:18776536	Probable phospholipid hydroperoxide glutathione peroxidase	GO:0004602,GO:0005737,GO:0006979,GO:0047066	glutathione peroxidase activity|cytoplasm|response to oxidative stress|phospholipid-hydroperoxide glutathione peroxidase activity	ko00480,ko00590	Glutathione metabolism|Arachidonic acid metabolism
LOC18776592	713.379	475.043	951.714	2.00343	1.00247	7.9925e-07	1.53903e-05	Up	9.25487	11.9858	16.9554	23.9463	26.6633	24.3205	GeneID:18776592
LOC18776595	344.578	205.388	483.767	2.35538	1.23596	2.92984e-08	8.02138e-07	Up	4.12572	4.15101	4.21185	9.5484	8.57195	10.6759	GeneID:18776595	Zinc finger protein SHOOT GRAVITROPISM 5	GO:0003677,GO:0003700,GO:0005634,GO:0006355,GO:0009590,GO:0009630,GO:0009959,GO:0009965,GO:0010031,GO:0010601,GO:0046872,GO:0048444,GO:2000012,GO:2000904	DNA binding|DNA-binding transcription factor activity|nucleus|regulation of transcription, DNA-templated|detection of gravity|gravitropism|negative gravitropism|leaf morphogenesis|circumnutation|positive regulation of auxin biosynthetic process|metal ion binding|floral organ morphogenesis|regulation of auxin polar transport|regulation of starch metabolic process
LOC18776617	6185.04	8819.64	3550.44	0.402561	-1.31272	3.47469e-14	2.31594e-12	Down	266.865	265.733	288.436	113.57	86.8998	123.667	GeneID:18776617	Pectin acetylesterase 8	GO:0005576,GO:0009505,GO:0052793,GO:0071555	extracellular region|plant-type cell wall|pectin acetylesterase activity|cell wall organization	ko04310	Wnt signaling pathway
LOC18776623	292.825	498.438	87.2124	0.174971	-2.51481	0.000188952	0.00188943	Down	24.9116	21.5496	45.2777	6.92395	5.64657	3.25784	GeneID:18776623
LOC18776648	2872.38	1819.23	3925.54	2.1578	1.10956	1.72208e-05	0.000241378	Up	38.6849	47.5209	45.2706	79.6741	112.135	84.6519	GeneID:18776648	Leucine-rich repeat receptor-like serine/threonine/tyrosine-protein kinase SOBIR1
LOC18776664	121.899	15.277	228.521	14.9586	3.9029	3.39051e-20	4.45817e-18	Up	0.901495	0.262816	0.901653	8.78729	12.4189	9.10039	GeneID:18776664
LOC18776678	47.9427	12.8111	83.0743	6.48456	2.69701	4.71312e-09	1.49344e-07	Up	0.303453	0.0442335	0.523549	2.14762	1.59068	1.86039	GeneID:18776678	UPF0481 protein At3g47200	GO:0005886,GO:0016021	plasma membrane|integral component of membrane
LOC18776697	61.4444	92.4858	30.403	0.328731	-1.60502	5.05224e-05	0.000611106	Down	3.69299	3.85013	4.21557	0.874126	1.15272	1.74342	GeneID:18776697
LOC18776742	32.9517	48.0741	17.8294	0.370873	-1.431	0.00570266	0.0325633	Down	0.668403	0.78432	1.08802	0.418465	0.302132	0.207359	GeneID:18776742	Putative glycerol-3-phosphate transporter 4	GO:0005774,GO:0008643,GO:0016021,GO:0022857,GO:0055062	vacuolar membrane|carbohydrate transport|integral component of membrane|transmembrane transporter activity|phosphate ion homeostasis
LOC18776757	141.76	87.8442	195.676	2.22754	1.15545	0.00655079	0.0364165	Up	1.80293	2.50193	5.68022	5.73211	8.62899	7.42034	GeneID:18776757	Purple acid phosphatase 3	GO:0003993,GO:0005576,GO:0005773,GO:0046872	acid phosphatase activity|extracellular region|vacuole|metal ion binding	ko04142	Lysosome
LOC18776765	1784.45	726.846	2842.06	3.91012	1.96721	7.50043e-10	2.70983e-08	Up	12.8718	13.9045	11.9139	38.2259	57.6877	51.3165	GeneID:18776765	Auxin response factor 9	GO:0003700,GO:0005634,GO:0009734,GO:0043565	DNA-binding transcription factor activity|nucleus|auxin-activated signaling pathway|sequence-specific DNA binding	ko04075	Plant hormone signal transduction
LOC18776787	840.101	535.548	1144.65	2.13735	1.09582	1.04497e-08	3.10741e-07	Up	10.9407	11.9594	12.8624	22.4247	23.295	29.0148	GeneID:18776787
LOC18776817	12.8613	0	25.7226	Inf	Inf	3.82944e-08	1.019e-06	Up	0	0	0	1.49596	2.04581	1.91807	GeneID:18776817	G-type lectin S-receptor-like serine/threonine-protein kinase At4g27290
LOC18776825	28.4781	8.11199	48.8443	6.02124	2.59006	8.37328e-06	0.000127039	Up	0.260526	0.132916	0.2736	1.16302	1.13607	1.6434	GeneID:18776825	Putative anthocyanidin reductase	GO:0009813,GO:0016491,GO:0050662	flavonoid biosynthetic process|oxidoreductase activity|coenzyme binding
LOC18776832	1816.87	1185.77	2447.98	2.06447	1.04577	1.81121e-07	4.14305e-06	Up	8.86029	6.90058	8.75597	15.8225	19.0418	14.6355	GeneID:18776832	TMV resistance protein N	GO:0005524,GO:0005737,GO:0007165,GO:0009626,GO:0043531	ATP binding|cytoplasm|signal transduction|plant-type hypersensitive response|ADP binding
LOC18776836	69.719	18.5582	120.88	6.51356	2.70345	1.28189e-09	4.48059e-08	Up	0.554616	0.998669	0.376878	4.93754	4.51082	2.80016	GeneID:18776836	Cullin-1	GO:0000794,GO:0005634,GO:0005737,GO:0005819,GO:0005829,GO:0006511,GO:0007049,GO:0009524,GO:0009733,GO:0009734,GO:0009753,GO:0009793,GO:0009867,GO:0009873,GO:0010087,GO:0016567,GO:0031461,GO:0031625,GO:0042752,GO:0048366	condensed nuclear chromosome|nucleus|cytoplasm|spindle|cytosol|ubiquitin-dependent protein catabolic process|cell cycle|phragmoplast|response to auxin|auxin-activated signaling pathway|response to jasmonic acid|embryo development ending in seed dormancy|jasmonic acid mediated signaling pathway|ethylene-activated signaling pathway|phloem or xylem histogenesis|protein ubiquitination|cullin-RING ubi…	ko04114,ko04141,ko04110,ko04341,ko04340,ko04120,ko04350,ko04111,ko04310	Oocyte meiosis|Protein processing in endoplasmic reticulum|Cell cycle|Hedgehog signaling pathway - fly|Hedgehog signaling pathway|Ubiquitin mediated proteolysis|TGF-beta signaling pathway|Cell cycle - yeast|Wnt signaling pathway
LOC18776906	60.6634	93.3358	27.9911	0.299897	-1.73746	1.33339e-05	0.00019248	Down	8.73344	6.94782	6.21812	1.36995	1.88922	3.13798	GeneID:18776906				ko00240	Pyrimidine metabolism
LOC18776908	34.6001	52.1797	17.0205	0.32619	-1.61622	0.00148916	0.0109947	Down	1.1079	1.6957	1.18879	0.708042	0.204928	0.37359	GeneID:18776908	NAC domain-containing protein 43	GO:0003677,GO:0003700,GO:0005634,GO:0009834,GO:0010047,GO:0045893	DNA binding|DNA-binding transcription factor activity|nucleus|plant-type secondary cell wall biogenesis|fruit dehiscence|positive regulation of transcription, DNA-templated
LOC18776921	211.442	24.1683	398.716	16.4975	4.04417	0.000150992	0.00156826	Up	0.870252	0.456674	0.574467	5.82061	16.5018	8.09934	GeneID:18776921	Cytochrome P450 78A5	GO:0005506,GO:0005783,GO:0008284,GO:0016020,GO:0016021,GO:0016709,GO:0020037,GO:0035265,GO:0040009,GO:0046622,GO:0048437	iron ion binding|endoplasmic reticulum|positive regulation of cell proliferation|membrane|integral component of membrane|oxidoreductase activity, acting on paired donors, with incorporation or reduction of molecular oxygen, NAD(P)H as one donor, and incorporation of one atom of oxygen|heme binding|organ growth|regulation of growth rate|positive regulation of organ growth|floral organ development
LOC18776951	86.75	19.9592	153.541	7.69274	2.9435	3.58549e-14	2.38158e-12	Up	0.838159	0.0834372	0.36497	3.67265	2.41343	3.67836	GeneID:18776951	Probable metal-nicotianamine transporter YSL8	GO:0005886,GO:0016021,GO:0055085	plasma membrane|integral component of membrane|transmembrane transport
LOC18776961	7879.23	5058.82	10699.6	2.11505	1.08069	0.00305238	0.0196993	Up	138.938	163.874	247.947	289.655	478.628	368.343	GeneID:18776961	Nudix hydrolase 4	GO:0000210,GO:0005634,GO:0005737,GO:0005829,GO:0046872,GO:0047631	NAD+ diphosphatase activity|nucleus|cytoplasm|cytosol|metal ion binding|ADP-ribose diphosphatase activity
LOC18776964	1072.19	6.46533	2137.91	330.672	8.36926	6.76414e-73	7.69083e-70	Up	0.0301956	0.369727	0.221976	65.7875	78.2329	55.7995	GeneID:18776964	Thaumatin-like protein	GO:0005576,GO:0031640,GO:0050832	extracellular region|killing of cells of other organism|defense response to fungus
LOC18777000	123.013	53.3589	192.666	3.61076	1.8523	1.59635e-07	3.70419e-06	Up	1.87441	2.95996	2.71837	7.43465	7.83193	11.3531	GeneID:18777000	Auxin-responsive protein SAUR36	GO:0005634,GO:0007275,GO:0009734,GO:0010029,GO:0040008,GO:1900057	nucleus|multicellular organism development|auxin-activated signaling pathway|regulation of seed germination|regulation of growth|positive regulation of leaf senescence	ko04075	Plant hormone signal transduction
LOC18777006	824.397	1217.56	431.233	0.354178	-1.49746	1.72181e-14	1.17186e-12	Down	76.7501	70.7867	78.2039	30.2777	23.9721	24.2158	GeneID:18777006	Protein HVA22	GO:0005783,GO:0005794,GO:0009737,GO:0016021	endoplasmic reticulum|Golgi apparatus|response to abscisic acid|integral component of membrane
LOC18777013	536.201	766.276	306.127	0.3995	-1.32373	1.69815e-10	6.78517e-09	Down	23.1492	19.3026	25.4882	8.84925	7.57108	10.2014	GeneID:18777013	Pectin acetylesterase 8	GO:0005576,GO:0009505,GO:0052793,GO:0071555	extracellular region|plant-type cell wall|pectin acetylesterase activity|cell wall organization	ko04310	Wnt signaling pathway
LOC18777015	31.3817	4.57001	58.1933	12.7337	3.67059	1.8346e-06	3.2414e-05	Up	0	0.15126	0.15568	0.807033	1.77937	1.20447	GeneID:18777015	Transcription factor CYCLOIDEA (Fragment)	GO:0003677,GO:0005634,GO:0007275	DNA binding|nucleus|multicellular organism development
LOC18777019	1825.03	2525.35	1124.7	0.445366	-1.16694	4.7439e-05	0.000578881	Down	125.915	150.107	127.317	86.3373	65.5948	24.5215	GeneID:18777019	Germin-like protein subfamily 1 member 20	GO:0005618,GO:0030145,GO:0031012,GO:0045735,GO:0048046,GO:0055114	cell wall|manganese ion binding|extracellular matrix|nutrient reservoir activity|apoplast|oxidation-reduction process
LOC18777058	2040.87	2873.08	1208.67	0.420688	-1.24918	2.6296e-12	1.36267e-10	Down	93.5618	98.9204	85.3227	48.8942	38.0986	27.648	GeneID:18777058	Ethylene-responsive transcription factor ERF114	GO:0003700,GO:0005634,GO:0007275,GO:0009873,GO:0043565,GO:0050832	DNA-binding transcription factor activity|nucleus|multicellular organism development|ethylene-activated signaling pathway|sequence-specific DNA binding|defense response to fungus
LOC18777074	36.3507	7.10303	65.5984	9.23527	3.20715	3.86785e-09	1.24189e-07	Up	0.329353	0	0.161411	1.21925	1.33111	1.90727	GeneID:18777074
LOC18777076	528.574	242.59	814.558	3.35776	1.7475	0.000488259	0.00425691	Up	9.45412	4.54127	7.19966	16.4339	20.9042	32.2453	GeneID:18777076
LOC18777080	27.195	4.65621	49.7339	10.6812	3.417	0.000449586	0.00396625	Up	0.0738685	0	0.284443	0.804289	1.99031	0.967572	GeneID:18777080	B2 protein
LOC18777114	146.931	94.1858	199.676	2.12003	1.08408	0.00487099	0.0286523	Up	1.77994	2.61206	1.59623	2.78727	4.42434	5.10829	GeneID:18777114	Cellulose synthase-like protein G3	GO:0000139,GO:0005794,GO:0005802,GO:0005886,GO:0009833,GO:0016021,GO:0016759,GO:0016760,GO:0030244,GO:0071555	Golgi membrane|Golgi apparatus|trans-Golgi network|plasma membrane|plant-type primary cell wall biogenesis|integral component of membrane|cellulose synthase activity|cellulose synthase (UDP-forming) activity|cellulose biosynthetic process|cell wall organization
LOC18777168	542.427	761.164	323.69	0.425257	-1.23359	0.00496555	0.0290934	Down	55.8479	26.4343	45.3817	19.1903	14.1721	20.0376	GeneID:18777168	Disease resistance response protein 206	GO:0006952,GO:0009607,GO:0048046	defense response|response to biotic stimulus|apoplast
LOC18777212	540.358	225.738	854.978	3.78748	1.92124	5.52726e-06	8.83675e-05	Up	3.71382	3.93277	3.52329	13.4222	17.8577	9.97229	GeneID:18777212	Disease resistance protein RPM1
LOC18777214	972.309	242.539	1702.08	7.01775	2.81101	5.70397e-44	2.62505e-41	Up	2.5926	4.8411	2.57296	24.3048	20.4188	23.7806	GeneID:18777214	TMV resistance protein N	GO:0005524,GO:0005737,GO:0007165,GO:0009626,GO:0043531	ATP binding|cytoplasm|signal transduction|plant-type hypersensitive response|ADP binding
LOC18777220	3565.35	5784.88	1345.81	0.232643	-2.10381	1.04608e-19	1.27167e-17	Down	322.682	449.585	352.121	86.2016	73.7841	95.7365	GeneID:18777220	Non-specific lipid-transfer protein 2	GO:0006869,GO:0008289	lipid transport|lipid binding
LOC18777260	4.0874	8.1748	0	0	#NAME?	0.00586819	0.0334197	Down	0.238862	0.121863	0.407629	0	0	0	GeneID:18777260
LOC18777262	115.895	185.008	46.781	0.252859	-1.9836	3.46813e-10	1.31701e-08	Down	4.62679	5.40772	6.39029	1.12967	1.16313	1.76884	GeneID:18777262	Cytochrome P450 CYP736A12	GO:0004497,GO:0005506,GO:0016021,GO:0016705,GO:0020037	monooxygenase activity|iron ion binding|integral component of membrane|oxidoreductase activity, acting on paired donors, with incorporation or reduction of molecular oxygen|heme binding
LOC18777267	4961.25	3050.5	6872	2.25275	1.17169	9.28841e-09	2.78782e-07	Up	92.9326	92.3873	92.9705	170.368	209.654	231.799	GeneID:18777267	BTB/POZ domain-containing protein At5g41330	GO:0016567,GO:0051260	protein ubiquitination|protein homooligomerization
LOC18777280	24.0093	38.6976	9.32112	0.240871	-2.05367	0.000784936	0.0064044	Down	0.603552	0.9331	0.71067	0.199138	0.252879	0.0756524	GeneID:18777280	Homeobox-leucine zipper protein HDG11	GO:0000976,GO:0003700,GO:0005634,GO:0008289,GO:0009828,GO:0010091	transcription regulatory region sequence-specific DNA binding|DNA-binding transcription factor activity|nucleus|lipid binding|plant-type cell wall loosening|trichome branching
LOC18777284	175.582	351.165	0	0	#NAME?	4.56764e-06	7.41292e-05	Down	24.6008	3.98442	43.1272	0	0	0	GeneID:18777284	Eukaryotic initiation factor 4A-III homolog A	GO:0000184,GO:0003723,GO:0004386,GO:0005524,GO:0005634,GO:0005737,GO:0006397,GO:0006417,GO:0008380,GO:0051028	nuclear-transcribed mRNA catabolic process, nonsense-mediated decay|RNA binding|helicase activity|ATP binding|nucleus|cytoplasm|mRNA processing|regulation of translation|RNA splicing|mRNA transport	ko03040,ko03015,ko03013	Spliceosome|mRNA surveillance pathway|RNA transport
LOC18777324	56.4736	97.5129	15.4342	0.158279	-2.65946	0.000276359	0.00261721	Down	12.4854	19.56	7.15199	0.961212	2.4144	2.60832	GeneID:18777324	Thioredoxin-like protein CDSP32, chloroplastic	GO:0006662,GO:0006979,GO:0009414,GO:0009507,GO:0009570,GO:0009941,GO:0015035,GO:0045454	glycerol ether metabolic process|response to oxidative stress|response to water deprivation|chloroplast|chloroplast stroma|chloroplast envelope|protein disulfide oxidoreductase activity|cell redox homeostasis
LOC18777327	19208.2	11021.6	27394.9	2.48556	1.31357	6.19222e-06	9.79456e-05	Up	192.148	243.755	204.812	413.28	625.428	510.762	GeneID:18777327	Transcription factor MYC2	GO:0003677,GO:0003700,GO:0005634,GO:0009269,GO:0009611,GO:0009737,GO:0009738,GO:0009753,GO:0009963,GO:0010200,GO:0019900,GO:0043565,GO:0043619,GO:0045893,GO:0046983,GO:0051090,GO:0051289,GO:2000068	DNA binding|DNA-binding transcription factor activity|nucleus|response to desiccation|response to wounding|response to abscisic acid|abscisic acid-activated signaling pathway|response to jasmonic acid|positive regulation of flavonoid biosynthetic process|response to chitin|kinase binding|sequence-specific DNA binding|regulation of transcription from RNA polymerase II promoter in response to oxida…	ko04075	Plant hormone signal transduction
LOC18777352	439.107	691.259	186.955	0.270457	-1.88653	1.67028e-08	4.79003e-07	Down	22.895	17.4022	27.5674	6.32512	6.47588	5.20416	GeneID:18777352	Kunitz trypsin inhibitor 2	GO:0004866,GO:0005618,GO:0048046	endopeptidase inhibitor activity|cell wall|apoplast
LOC18777360	536.199	348.872	723.526	2.0739	1.05235	2.73948e-07	5.89003e-06	Up	11.1255	9.36907	10.6189	20.9151	22.5273	19.6893	GeneID:18777360	WAT1-related protein At5g47470	GO:0005886,GO:0016021,GO:0022857	plasma membrane|integral component of membrane|transmembrane transporter activity
LOC18777383	204.279	273.131	135.426	0.495828	-1.01209	7.44921e-05	0.000857569	Down	3.99371	4.56952	5.8788	2.23788	2.15047	2.62654	GeneID:18777383	ABC transporter A family member 2	GO:0005215,GO:0005524,GO:0006869,GO:0016021,GO:0042626,GO:0043231	transporter activity|ATP binding|lipid transport|integral component of membrane|ATPase activity, coupled to transmembrane movement of substances|intracellular membrane-bounded organelle
LOC18777388	53.8752	80.5303	27.22	0.33801	-1.56486	0.000152929	0.00158667	Down	5.33414	3.28529	3.63362	1.51737	1.78887	0.74541	GeneID:18777388	Chlorophyll a-b binding protein P4, chloroplastic	GO:0009522,GO:0009523,GO:0009535,GO:0009765,GO:0016021,GO:0016168,GO:0018298,GO:0046872	photosystem I|photosystem II|chloroplast thylakoid membrane|photosynthesis, light harvesting|integral component of membrane|chlorophyll binding|protein-chromophore linkage|metal ion binding	ko00196	Photosynthesis - antenna proteins
LOC18777389	120.301	78.1373	162.465	2.07922	1.05604	0.000503812	0.00437475	Up	3.03914	3.77059	1.77717	5.33961	6.86876	5.14272	GeneID:18777389	Beta-carotene 3-hydroxylase 1, chloroplastic	GO:0005506,GO:0016021,GO:0016123,GO:0016491,GO:0016787,GO:0031969	iron ion binding|integral component of membrane|xanthophyll biosynthetic process|oxidoreductase activity|hydrolase activity|chloroplast membrane	ko00906	Carotenoid biosynthesis
LOC18777392	1289.82	477.937	2101.71	4.39746	2.13667	0.000390079	0.00352823	Up	18.8275	28.0034	42.3338	72.359	168.293	140.803	GeneID:18777392	Calcium-binding protein CML38	GO:0005509,GO:0005886,GO:0009611	calcium ion binding|plasma membrane|response to wounding
LOC18777422	9.28996	16.5628	2.01717	0.12179	-3.03754	0.00466177	0.0276743	Down	0.469068	0.119655	0.431031	0.0212803	0	0.101055	GeneID:18777422	Wall-associated receptor kinase-like 3
LOC18777437	126.086	172.371	79.8012	0.462962	-1.11104	0.000161285	0.00165581	Down	6.87829	7.88583	6.37126	3.0714	3.20571	3.2767	GeneID:18777437	Chlorophyll a-b binding protein 7, chloroplastic	GO:0009416,GO:0009522,GO:0009523,GO:0009535,GO:0009637,GO:0009768,GO:0010218,GO:0016021,GO:0016168,GO:0018298	response to light stimulus|photosystem I|photosystem II|chloroplast thylakoid membrane|response to blue light|photosynthesis, light harvesting in photosystem I|response to far red light|integral component of membrane|chlorophyll binding|protein-chromophore linkage	ko00196	Photosynthesis - antenna proteins
LOC18777456	754.357	314.393	1194.32	3.79881	1.92555	1.63369e-08	4.69904e-07	Up	15.8604	16.2303	13.6236	42.2243	65.5738	61.1492	GeneID:18777456	Late embryogenesis abundant protein At1g64065	GO:0005886,GO:0016021	plasma membrane|integral component of membrane
LOC18777459	2283.21	3394.2	1172.23	0.345362	-1.53382	5.56786e-17	5.02903e-15	Down	177.979	179.476	217.127	67.1962	73.7156	53.312	GeneID:18777459	Glutathione S-transferase U10	GO:0004364,GO:0005737,GO:0005829,GO:0006749,GO:0009407	glutathione transferase activity|cytoplasm|cytosol|glutathione metabolic process|toxin catabolic process	ko00982,ko00480,ko00980	Drug metabolism - cytochrome P450|Glutathione metabolism|Metabolism of xenobiotics by cytochrome P450
LOC18777469	62.1759	40.4647	83.8872	2.0731	1.05179	0.00659715	0.0366321	Up	0.932384	1.87302	0.948575	2.79178	2.41718	2.38031	GeneID:18777469	SWI/SNF complex subunit SWI3B	GO:0003677,GO:0005634,GO:0006338,GO:0007275,GO:0016514	DNA binding|nucleus|chromatin remodeling|multicellular organism development|SWI/SNF complex
LOC18777482	952.51	626.601	1278.42	2.04024	1.02874	0.00132244	0.00993836	Up	19.8223	17.9703	11.6346	27.2354	29.1668	41.8955	GeneID:18777482	Protein NRT1/ PTR FAMILY 6.3	GO:0005886,GO:0006857,GO:0009414,GO:0009635,GO:0009734,GO:0010167,GO:0015112,GO:0015293,GO:0015706,GO:0016021,GO:0042128	plasma membrane|oligopeptide transport|response to water deprivation|response to herbicide|auxin-activated signaling pathway|response to nitrate|nitrate transmembrane transporter activity|symporter activity|nitrate transport|integral component of membrane|nitrate assimilation
LOC18777487	284.233	170.396	398.071	2.33616	1.22414	0.00299153	0.0193778	Up	4.87276	2.65174	4.13932	10.7054	5.43593	10.7273	GeneID:18777487	Heparanase-like protein 1	GO:0004566,GO:0005576,GO:0005618,GO:0005765,GO:0009505,GO:0009826	beta-glucuronidase activity|extracellular region|cell wall|lysosomal membrane|plant-type cell wall|unidimensional cell growth	ko00531	Glycosaminoglycan degradation
LOC18777491	19.6905	0	39.381	Inf	Inf	5.58234e-12	2.78814e-10	Up	0	0	0	2.65639	2.34167	2.27677	GeneID:18777491	Probable S-adenosylmethionine-dependent methyltransferase At5g38100	GO:0008168,GO:0046872	methyltransferase activity|metal ion binding
LOC18777506	19.5013	4.19354	34.8091	8.30064	3.05322	9.27854e-05	0.00102953	Up	0.297476	0.0867243	0.178517	0.971686	2.21472	1.36231	GeneID:18777506
LOC18777512	8.89739	1.6224	16.1724	9.9682	3.31733	0.0027308	0.0179658	Up	0.0592964	0.0302521	0.0622721	0.355094	0.662195	0.459887	GeneID:18777512	Ent-kaurenoic acid oxidase	GO:0004497,GO:0005506,GO:0005783,GO:0005789,GO:0007275,GO:0009685,GO:0009686,GO:0009846,GO:0009860,GO:0010268,GO:0016021,GO:0016125,GO:0016132,GO:0020037,GO:0051777,GO:0055114	monooxygenase activity|iron ion binding|endoplasmic reticulum|endoplasmic reticulum membrane|multicellular organism development|gibberellin metabolic process|gibberellin biosynthetic process|pollen germination|pollen tube growth|brassinosteroid homeostasis|integral component of membrane|sterol metabolic process|brassinosteroid biosynthetic process|heme binding|ent-kaurenoate oxidase activity|oxid…
LOC18777514	2135.23	1352.34	2918.13	2.15784	1.10959	4.27893e-10	1.59976e-08	Up	19.4939	22.1559	19.3813	49.2363	35.7914	44.0841	GeneID:18777514	Probable glucan 1,3-alpha-glucosidase	GO:0005783,GO:0005975,GO:0006952,GO:0030246,GO:0033919	endoplasmic reticulum|carbohydrate metabolic process|defense response|carbohydrate binding|glucan 1,3-alpha-glucosidase activity
LOC18777528	382.812	193.473	572.151	2.95727	1.56426	0.00647998	0.0360851	Up	6.61821	1.72507	4.24382	12.4365	7.17055	17.0777	GeneID:18777528	Transcription factor MYC2	GO:0003677,GO:0003700,GO:0005634,GO:0009269,GO:0009611,GO:0009737,GO:0009738,GO:0009753,GO:0009963,GO:0010200,GO:0019900,GO:0043565,GO:0043619,GO:0045893,GO:0046983,GO:0051090,GO:0051289,GO:2000068	DNA binding|DNA-binding transcription factor activity|nucleus|response to desiccation|response to wounding|response to abscisic acid|abscisic acid-activated signaling pathway|response to jasmonic acid|positive regulation of flavonoid biosynthetic process|response to chitin|kinase binding|sequence-specific DNA binding|regulation of transcription from RNA polymerase II promoter in response to oxida…
LOC18777529	3658.62	2263.4	5053.84	2.23285	1.15889	2.70658e-11	1.20821e-09	Up	57.2709	57.3654	60.5555	130.833	126.06	126.027	GeneID:18777529	Monodehydroascorbate reductase, chloroplastic/mitochondrial	GO:0005524,GO:0005739,GO:0009409,GO:0009507,GO:0009570,GO:0010319,GO:0016656,GO:0046686,GO:0050660	ATP binding|mitochondrion|response to cold|chloroplast|chloroplast stroma|stromule|monodehydroascorbate reductase (NADH) activity|response to cadmium ion|flavin adenine dinucleotide binding	ko00053	Ascorbate and aldarate metabolism
LOC18777535	76.2412	134.953	17.5292	0.129891	-2.94463	4.02581e-14	2.6558e-12	Down	8.89445	11.2797	7.07233	1.31431	1.35142	0.788378	GeneID:18777535	Protein SPIRAL1-like 5	GO:0010005,GO:0043622	cortical microtubule, transverse to long axis|cortical microtubule organization
LOC18777539	237.019	324.705	149.332	0.4599	-1.12061	0.00493364	0.0289498	Down	11.0183	8.27893	5.44527	3.03187	3.85519	4.19516	GeneID:18777539	WAT1-related protein At3g30340	GO:0005886,GO:0016021,GO:0022857	plasma membrane|integral component of membrane|transmembrane transporter activity
LOC18777550	172.802	98.2441	247.36	2.51781	1.33217	6.89633e-07	1.34918e-05	Up	3.16049	2.55857	2.41388	6.88235	6.19501	6.96868	GeneID:18777550	Flavonoid 3'-monooxygenase	GO:0004497,GO:0005506,GO:0005789,GO:0009813,GO:0016021,GO:0016705,GO:0020037	monooxygenase activity|iron ion binding|endoplasmic reticulum membrane|flavonoid biosynthetic process|integral component of membrane|oxidoreductase activity, acting on paired donors, with incorporation or reduction of molecular oxygen|heme binding
LOC18777570	1925.16	2946.76	903.547	0.306624	-1.70546	0.000128896	0.00136816	Down	187.336	142.536	262.004	82.1436	51.6213	45.4544	GeneID:18777570	Kunitz trypsin inhibitor 2	GO:0004866,GO:0005618,GO:0048046	endopeptidase inhibitor activity|cell wall|apoplast
LOC18777610	206.933	281.268	132.598	0.47143	-1.08488	1.87512e-05	0.00025963	Down	5.72058	6.16259	7.05733	1.87554	3.21177	3.60657	GeneID:18777610	U-box domain-containing protein 19	GO:0004842,GO:0005634,GO:0005737,GO:0010029	ubiquitin-protein transferase activity|nucleus|cytoplasm|regulation of seed germination
LOC18777632	350.643	215.588	485.697	2.25289	1.17178	0.00188881	0.0134026	Up	8.41006	7.24558	11.3734	25.7864	12.8264	21.4959	GeneID:18777632	Haloacid dehalogenase-like hydrolase domain-containing protein Sgpp	GO:0005829,GO:0005886,GO:0046872,GO:0050308	cytosol|plasma membrane|metal ion binding|sugar-phosphatase activity
LOC18777682	44.4362	18.2679	70.6045	3.86495	1.95045	0.000146706	0.00152867	Up	1.18107	0.803416	0.551261	3.19109	4.23371	2.12604	GeneID:18777682	(-)-isopiperitenol/(-)-carveol dehydrogenase, mitochondrial	GO:0000166,GO:0005739,GO:0018458,GO:0018459,GO:0031525	nucleotide binding|mitochondrion|isopiperitenol dehydrogenase activity|carveol dehydrogenase activity|menthol biosynthetic process
LOC18777700	631.83	1008.86	254.799	0.252562	-1.98529	4.19878e-13	2.42989e-11	Down	31.1909	31.2369	21.672	7.7756	8.32141	4.64269	GeneID:18777700	Aluminum-activated malate transporter 10	GO:0009705,GO:0015743,GO:0016021	plant-type vacuole membrane|malate transport|integral component of membrane
LOC18777701	109.865	160.519	59.2117	0.368876	-1.43879	3.28702e-05	0.000422439	Down	6.43962	10.1346	11.1758	3.62461	3.1343	3.27317	GeneID:18777701	DNA-directed RNA polymerase II subunit RPB7	GO:0000291,GO:0000932,GO:0003697,GO:0003727,GO:0003899,GO:0005665,GO:0006367,GO:0031369,GO:0045948,GO:0060213	nuclear-transcribed mRNA catabolic process, exonucleolytic|P-body|single-stranded DNA binding|single-stranded RNA binding|DNA-directed 5'-3' RNA polymerase activity|RNA polymerase II, core complex|transcription initiation from RNA polymerase II promoter|translation initiation factor binding|positive regulation of translational initiation|positive regulation of nuclear-transcribed mRNA poly(A) tai…	ko00230,ko00240,ko03020	Purine metabolism|Pyrimidine metabolism|RNA polymerase
LOC18777725	217.963	79.1029	356.822	4.51086	2.1734	5.23842e-17	4.7761e-15	Up	0.613394	0.870801	0.746872	3.32	3.0445	3.47492	GeneID:18777725
LOC18777733	214.905	141.726	288.085	2.03269	1.02339	0.000188003	0.00188383	Up	2.58856	2.24162	2.80789	4.24623	4.58252	6.35747	GeneID:18777733	Alpha-N-acetylglucosaminidase	GO:0004561,GO:0005773,GO:0008152,GO:0009793,GO:0051781	alpha-N-acetylglucosaminidase activity|vacuole|metabolic process|embryo development ending in seed dormancy|positive regulation of cell division	ko00531,ko04142	Glycosaminoglycan degradation|Lysosome
LOC18777741	470.808	301.702	639.913	2.12101	1.08475	2.17246e-05	0.000295094	Up	6.98654	7.8558	7.14407	16.8406	17.3791	11.3838	GeneID:18777741	Cytochrome P450 71A6 (Fragment)	GO:0004497,GO:0005506,GO:0016021,GO:0016705,GO:0020037	monooxygenase activity|iron ion binding|integral component of membrane|oxidoreductase activity, acting on paired donors, with incorporation or reduction of molecular oxygen|heme binding
LOC18777755	97.1724	60.205	134.14	2.22805	1.15578	0.00344056	0.0217045	Up	3.07263	4.85958	6.69566	14.4694	7.59805	10.0883	GeneID:18777755	Chemocyanin	GO:0009055,GO:0046872	electron transfer activity|metal ion binding
LOC18777767	84.2454	120.888	47.6034	0.393782	-1.34453	0.000103533	0.00112998	Down	8.6213	8.40301	7.63505	1.7513	2.12128	5.58868	GeneID:18777767	Putative invertase inhibitor	GO:0004857,GO:0005576	enzyme inhibitor activity|extracellular region
LOC18777774	458.385	172.096	744.674	4.32709	2.1134	3.14906e-22	4.90872e-20	Up	7.70799	8.94174	8.38391	30.8227	36.5008	38.3833	GeneID:18777774	FCS-Like Zinc finger 2	GO:0009744,GO:0009749,GO:0019900,GO:0042594,GO:0046872,GO:1905582	response to sucrose|response to glucose|kinase binding|response to starvation|metal ion binding|response to mannose
LOC18777786	341.779	545.401	138.156	0.25331	-1.98102	0.00675242	0.0373334	Down	12.4274	10.0081	23.5199	7.04199	2.72877	1.82403	GeneID:18777786	8-amino-7-oxononanoate synthase	GO:0005777,GO:0005829,GO:0008710,GO:0009102,GO:0030170	peroxisome|cytosol|8-amino-7-oxononanoate synthase activity|biotin biosynthetic process|pyridoxal phosphate binding	ko00780	Biotin metabolism
LOC18777800	478.378	718.31	238.446	0.331954	-1.59095	5.02342e-14	3.28032e-12	Down	24.5773	23.8492	21.8872	7.09343	9.12924	6.54541	GeneID:18777800	Wall-associated receptor kinase-like 14
LOC18777840	22.7641	8.68384	36.8444	4.24287	2.08504	0.000919919	0.00732939	Up	0.441867	0.0237298	0.170963	1.03818	0.643102	0.986015	GeneID:18777840	Protein IQ-DOMAIN 1	GO:0005516,GO:0005634,GO:0005737,GO:0005874,GO:0008017	calmodulin binding|nucleus|cytoplasm|microtubule|microtubule binding
LOC18777850	130.974	177.766	84.1818	0.473553	-1.0784	0.00109011	0.00845193	Down	9.78497	9.60987	14.9645	5.46017	5.0084	5.502	GeneID:18777850	Disease resistance response protein 206	GO:0006952,GO:0009607,GO:0048046	defense response|response to biotic stimulus|apoplast
LOC18777871	2499.45	1630.43	3368.46	2.06599	1.04683	0.00162664	0.0118557	Up	100.79	57.923	125.083	149.986	226.6	197.044	GeneID:18777871
LOC18777909	1027.67	334.067	1721.26	5.15245	2.36526	5.2102e-23	8.83403e-21	Up	14.1724	9.14885	20.2209	64.6486	72.4668	83.0203	GeneID:18777909
LOC18777944	367.172	230.875	503.469	2.1807	1.12479	0.004571	0.027261	Up	6.39209	10.7711	9.58981	26.2483	12.7423	18.4326	GeneID:18777944	36.4 kDa proline-rich protein
LOC18777953	281.879	24.6067	539.152	21.9108	4.45357	1.87572e-07	4.2504e-06	Up	1.04056	0.825809	2.61053	19.0088	46.2361	30.5476	GeneID:18777953	Germin-like protein subfamily T member 2	GO:0005618,GO:0030145,GO:0045735,GO:0048046	cell wall|manganese ion binding|nutrient reservoir activity|apoplast
LOC18777969	419.133	784.272	53.994	0.068846	-3.86048	5.46804e-19	6.21716e-17	Down	31.0585	35.5987	20.9207	3.02209	1.45734	1.45328	GeneID:18777969	Bidirectional sugar transporter SWEET4	GO:0005887,GO:0051119	integral component of plasma membrane|sugar transmembrane transporter activity
LOC18777974	21.5066	3.22443	39.7888	12.3398	3.62525	5.46746e-07	1.10199e-05	Up	0.133475	0.022699	0.0700868	1.01731	0.970069	0.759147	GeneID:18777974	Probable S-adenosylmethionine-dependent methyltransferase At5g37990	GO:0008168,GO:0046872	methyltransferase activity|metal ion binding
LOC18777985	46.5998	67.8136	25.3859	0.374348	-1.41755	0.00134376	0.0100868	Down	1.3098	1.54387	1.99215	0.590122	0.648501	0.537116	GeneID:18777985
LOC18777994	406.166	133.31	679.021	5.09353	2.34867	0.00480608	0.0283654	Up	4.01424	2.68733	2.27514	21.2988	5.24081	18.6251	GeneID:18777994	Glutamate--cysteine ligase, chloroplastic	GO:0004357,GO:0005524,GO:0006750,GO:0009507	glutamate-cysteine ligase activity|ATP binding|glutathione biosynthetic process|chloroplast	ko00480,ko00270	Glutathione metabolism|Cysteine and methionine metabolism
LOC18778000	66.5423	91.5817	41.5029	0.453179	-1.14185	0.00253646	0.0169645	Down	4.3332	4.28881	3.95907	2.68928	0.921737	2.01643	GeneID:18778000	Glutathione S-transferase F13	GO:0004364,GO:0005737,GO:0005829,GO:0006749,GO:0009407	glutathione transferase activity|cytoplasm|cytosol|glutathione metabolic process|toxin catabolic process	ko00982,ko00480,ko00980	Drug metabolism - cytochrome P450|Glutathione metabolism|Metabolism of xenobiotics by cytochrome P450
LOC18778012	8327.54	5458.18	11196.9	2.0514	1.03661	2.38795e-06	4.10082e-05	Up	258.868	293.724	316.184	499.654	678.643	560.331	GeneID:18778012	Late embryogenesis abundant protein At1g64065	GO:0005886,GO:0016021	plasma membrane|integral component of membrane
LOC18778021	61.5226	20.4119	102.633	5.02811	2.33002	1.81162e-05	0.000252101	Up	0.416243	0.743262	0.196709	3.17247	1.83723	1.65718	GeneID:18778021	Probable inorganic phosphate transporter 1-9	GO:0005886,GO:0006817,GO:0015114,GO:0015293,GO:0015415,GO:0016021,GO:1901684	plasma membrane|phosphate ion transport|phosphate ion transmembrane transporter activity|symporter activity|ATPase-coupled phosphate ion transmembrane transporter activity|integral component of membrane|arsenate ion transmembrane transport
LOC18778029	70.1974	106.639	33.7563	0.316549	-1.6595	1.02777e-05	0.000151879	Down	2.27148	2.8912	2.75435	1.04538	0.547933	0.871768	GeneID:18778029
LOC18778046	202.943	102.848	303.038	2.94646	1.55899	0.00017948	0.00181727	Up	3.90325	4.51975	5.84932	10.3144	17.9583	12.6986	GeneID:18778046	Protein STAY-GREEN, chloroplastic
LOC18778052	11.5906	0	23.1812	Inf	Inf	1.02849e-06	1.92633e-05	Up	0	0	0	1.79192	0.632084	0.898211	GeneID:18778052	Isoflavone reductase homolog	GO:0016491	oxidoreductase activity
LOC18778057	14.6074	4.82647	24.3884	5.05305	2.33715	0.00341807	0.0215861	Up	0.451857	0.0461061	0.189813	1.08237	1.34564	0.981257	GeneID:18778057	Myb-related protein 308	GO:0003677,GO:0005634	DNA binding|nucleus
LOC18778109	541.657	741.076	342.238	0.461813	-1.11462	4.87014e-08	1.26186e-06	Down	39.3504	45.1373	39.0078	18.7626	18.7748	18.2001	GeneID:18778109
LOC18778110	253.665	361.421	145.908	0.403706	-1.30862	0.002919	0.0189843	Down	7.08124	14.6478	9.92512	5.4601	3.28219	3.78957	GeneID:18778110	Glucan endo-1,3-beta-glucosidase 12	GO:0005576,GO:0005618,GO:0005975,GO:0006952,GO:0031225,GO:0042973,GO:0046658,GO:0071555	extracellular region|cell wall|carbohydrate metabolic process|defense response|anchored component of membrane|glucan endo-1,3-beta-D-glucosidase activity|anchored component of plasma membrane|cell wall organization
LOC18778139	45.3684	67.9934	22.7433	0.334493	-1.57995	0.000391044	0.00353366	Down	4.499	2.76425	3.14985	0.684746	1.64646	1.05054	GeneID:18778139	Heme-binding-like protein At3g10130, chloroplastic	GO:0009507,GO:0009535,GO:0010287,GO:0020037	chloroplast|chloroplast thylakoid membrane|plastoglobule|heme binding
LOC18778161	2666.99	3932.67	1401.31	0.356324	-1.48874	2.92404e-05	0.000379988	Down	179.899	176.76	101.138	49.7368	58.6359	50.4952	GeneID:18778161	Heavy metal-associated isoprenylated plant protein 7	GO:0005886,GO:0030001,GO:0046914,GO:0046916	plasma membrane|metal ion transport|transition metal ion binding|cellular transition metal ion homeostasis
LOC18778187	590.351	318.827	861.876	2.70327	1.43471	0.00050587	0.00439064	Up	13.5833	16.8272	8.39827	22.7887	38.5387	40.359	GeneID:18778187	Ethylene-responsive transcription factor 12	GO:0003677,GO:0003700,GO:0005634,GO:0006952,GO:0009873	DNA binding|DNA-binding transcription factor activity|nucleus|defense response|ethylene-activated signaling pathway
LOC18778215	130.051	78.9599	181.142	2.2941	1.19793	0.000367377	0.00334166	Up	3.58694	4.01708	3.3535	6.28692	10.3284	7.82562	GeneID:18778215
LOC18778220	5371.6	2405.75	8337.45	3.46564	1.79312	0.00067909	0.00567193	Up	50.2717	55.9566	84.6347	132.756	285.224	225.904	GeneID:18778220	Phospholipase A1-Igamma1, chloroplastic	GO:0004620,GO:0004806,GO:0008970,GO:0009507,GO:0016042,GO:0047714	phospholipase activity|triglyceride lipase activity|phospholipase A1 activity|chloroplast|lipid catabolic process|galactolipase activity
LOC18778248	75.3188	29.4882	121.149	4.1084	2.03858	3.24361e-08	8.78091e-07	Up	0.694498	2.12593	1.82338	5.99541	5.96198	6.66881	GeneID:18778248	Squamosa promoter-binding protein 2	GO:0003677,GO:0003700,GO:0005634,GO:0009908,GO:0046872	DNA binding|DNA-binding transcription factor activity|nucleus|flower development|metal ion binding
LOC18778253	347.92	476.177	219.663	0.461305	-1.11621	5.35568e-07	1.08058e-05	Down	21.802	20.3923	23.0324	8.00697	10.5359	10.8254	GeneID:18778253	Protein PHLOEM PROTEIN 2-LIKE A1	GO:0009625,GO:0030246,GO:0043394	response to insect|carbohydrate binding|proteoglycan binding
LOC18778273	34.9982	16.5147	53.4818	3.23844	1.6953	0.00448776	0.0268807	Up	0.214328	0.417506	0.388782	1.61233	1.01543	0.624612	GeneID:18778273	Pescadillo homolog	GO:0000463,GO:0000466,GO:0005654,GO:0030687,GO:0043021,GO:0070545,GO:2000232	maturation of LSU-rRNA from tricistronic rRNA transcript (SSU-rRNA, 5.8S rRNA, LSU-rRNA)|maturation of 5.8S rRNA from tricistronic rRNA transcript (SSU-rRNA, 5.8S rRNA, LSU-rRNA)|nucleoplasm|preribosome, large subunit precursor|ribonucleoprotein complex binding|PeBoW complex|regulation of rRNA processing
LOC18778290	6498.52	3997.43	8999.61	2.25135	1.17079	2.67183e-07	5.75739e-06	Up	179.041	197.149	178.287	344.161	475.571	396.619	GeneID:18778290	Ethylene-responsive transcription factor 4	GO:0003700,GO:0005634,GO:0009723,GO:0009737,GO:0009864,GO:0009873,GO:0010105,GO:0010200,GO:0016604,GO:0043565,GO:0045892	DNA-binding transcription factor activity|nucleus|response to ethylene|response to abscisic acid|induced systemic resistance, jasmonic acid mediated signaling pathway|ethylene-activated signaling pathway|negative regulation of ethylene-activated signaling pathway|response to chitin|nuclear body|sequence-specific DNA binding|negative regulation of transcription, DNA-templated
LOC18778300	46.2007	76.812	15.5895	0.202956	-2.30076	5.74348e-07	1.14686e-05	Down	1.1246	1.1165	1.45236	0.264753	0.404089	0.0628623	GeneID:18778300	Putative F-box protein At3g29830
LOC18778305	334.766	507.034	162.499	0.32049	-1.64165	6.90818e-13	3.89295e-11	Down	10.6974	13.1829	11.1656	4.60206	2.73432	3.69491	GeneID:18778305	Putative F-box/LRR-repeat protein 23
LOC18778308	60.1606	3.87729	116.444	30.0323	4.90844	4.41537e-22	6.82757e-20	Up	0.0895204	0.0304479	0.0626752	1.77072	1.79316	1.8206	GeneID:18778308	Ribonuclease 3-like protein 2	GO:0003723,GO:0004525,GO:0005634,GO:0005737,GO:0006364,GO:0016442,GO:0030422,GO:0046872	RNA binding|ribonuclease III activity|nucleus|cytoplasm|rRNA processing|RISC complex|production of siRNA involved in RNA interference|metal ion binding
LOC18778327	226.327	133.061	319.593	2.40186	1.26415	0.000508157	0.00440851	Up	4.03068	4.2413	4.99356	13.9203	7.03326	10.4529	GeneID:18778327	Probable sodium/metabolite cotransporter BASS1, chloroplastic	GO:0009507,GO:0009941,GO:0016021,GO:0098717	chloroplast|chloroplast envelope|integral component of membrane|pantothenate import across plasma membrane
LOC18778330	469.071	871.502	66.6386	0.076464	-3.70908	2.79419e-07	5.99432e-06	Down	26.2398	13.9432	32.8893	0.636824	2.96894	1.81447	GeneID:18778330	Serine carboxypeptidase-like 31	GO:0004185,GO:0005576,GO:0005773,GO:0051603	serine-type carboxypeptidase activity|extracellular region|vacuole|proteolysis involved in cellular protein catabolic process
LOC18778340	3338.31	1850.95	4825.68	2.60714	1.38247	3.90053e-15	2.86667e-13	Up	54.056	37.21	39.0913	105.875	108.434	118.168	GeneID:18778340	5'-adenylylsulfate reductase 3, chloroplastic	GO:0000103,GO:0009507,GO:0009973,GO:0019344,GO:0019419,GO:0033741,GO:0045454,GO:0046872,GO:0051539	sulfate assimilation|chloroplast|adenylyl-sulfate reductase activity|cysteine biosynthetic process|sulfate reduction|adenylyl-sulfate reductase (glutathione) activity|cell redox homeostasis|metal ion binding|4 iron, 4 sulfur cluster binding	ko00920	Sulfur metabolism
LOC18778349	8246.13	13164.6	3327.66	0.252774	-1.98408	1.32834e-08	3.86678e-07	Down	429.723	289.176	442.204	123.496	55.6428	110.625	GeneID:18778349	Berberine bridge enzyme-like 8	GO:0005576,GO:0005618,GO:0016491,GO:0071949	extracellular region|cell wall|oxidoreductase activity|FAD binding
LOC18778353	24.7954	0	49.5909	Inf	Inf	1.39176e-13	8.54008e-12	Up	0	0	0	1.20711	2.10333	1.2704	GeneID:18778353	Berberine bridge enzyme-like 26	GO:0005576,GO:0005618,GO:0009506,GO:0016491,GO:0071949	extracellular region|cell wall|plasmodesma|oxidoreductase activity|FAD binding
LOC18778369	69.2603	38.2622	100.258	2.6203	1.38973	0.00021751	0.00213413	Up	1.62714	1.36901	0.479663	3.07708	2.76288	3.04054	GeneID:18778369	Organic cation/carnitine transporter 2	GO:0005524,GO:0006811,GO:0009705,GO:0016021,GO:0022857	ATP binding|ion transport|plant-type vacuole membrane|integral component of membrane|transmembrane transporter activity
LOC18778373	5196.14	7665.81	2726.47	0.355666	-1.4914	2.13639e-08	5.96738e-07	Down	271.149	351.343	229.127	107.851	111.971	75.7482	GeneID:18778373	Sorbitol dehydrogenase	GO:0003939,GO:0005737,GO:0005829,GO:0005886,GO:0008270,GO:0009506,GO:0031966	L-iditol 2-dehydrogenase activity|cytoplasm|cytosol|plasma membrane|zinc ion binding|plasmodesma|mitochondrial membrane	ko00040,ko00051	Pentose and glucuronate interconversions|Fructose and mannose metabolism
LOC18778400	38.3869	15.2336	61.5402	4.03976	2.01427	4.21291e-05	0.000524349	Up	0.218975	0.117597	0.21786	0.790558	0.882554	0.524391	GeneID:18778400	Putative multidrug resistance protein	GO:0005524,GO:0016021,GO:0042626	ATP binding|integral component of membrane|ATPase activity, coupled to transmembrane movement of substances	ko02010	ABC transporters
LOC18778416	688.619	1040.9	336.334	0.323117	-1.62987	2.2382e-06	3.88001e-05	Down	19.5354	22.9335	30.8788	6.83949	6.53883	9.83585	GeneID:18778416	Sodium/calcium exchanger NCL	GO:0000325,GO:0005432,GO:0005509,GO:0005773,GO:0005774,GO:0005886,GO:0006874,GO:0009506,GO:0015369,GO:0016020,GO:0016021,GO:0055074,GO:0070588,GO:0071472	plant-type vacuole|calcium:sodium antiporter activity|calcium ion binding|vacuole|vacuolar membrane|plasma membrane|cellular calcium ion homeostasis|plasmodesma|calcium:proton antiporter activity|membrane|integral component of membrane|calcium ion homeostasis|calcium ion transmembrane transport|cellular response to salt stress
LOC18778418	2467.86	1604.58	3331.14	2.07601	1.05382	0.000159539	0.00164378	Up	34.8487	54.8663	40.7656	78.313	107.353	77.9258	GeneID:18778418
LOC18778425	22.3792	6.15212	38.6063	6.27528	2.64968	5.27833e-05	0.000635669	Up	0.24957	0.181895	0.262094	1.74687	1.13759	1.40101	GeneID:18778425	Abscisic acid receptor PYL12	GO:0004864,GO:0005634,GO:0005737,GO:0005886,GO:0009738,GO:0010427,GO:0038023,GO:0042803,GO:0080163	protein phosphatase inhibitor activity|nucleus|cytoplasm|plasma membrane|abscisic acid-activated signaling pathway|abscisic acid binding|signaling receptor activity|protein homodimerization activity|regulation of protein serine/threonine phosphatase activity	ko04075	Plant hormone signal transduction
LOC18778448	50.7693	18.1657	83.373	4.5896	2.19837	5.34252e-07	1.07905e-05	Up	0.762382	0.103721	0.587137	1.74319	2.51364	2.2863	GeneID:18778448	Putative disease resistance protein RGA1	GO:0005524,GO:0006952,GO:0043531	ATP binding|defense response|ADP binding
LOC18778491	3784.78	2288.75	5280.81	2.30729	1.2062	1.86169e-05	0.000257955	Up	120.086	118.642	150.252	222.909	320.331	332.557	GeneID:18778491	Uncharacterized endoplasmic reticulum membrane protein C16E8.02	GO:0005783,GO:0030176,GO:0046521	endoplasmic reticulum|integral component of endoplasmic reticulum membrane|sphingoid catabolic process
LOC18778507	182.525	0.315816	364.734	1154.9	10.1735	4.33729e-75	5.98824e-72	Up	0	0.0251855	0	9.29871	9.76575	8.83145	GeneID:18778507
LOC18778549	1302.85	814.642	1791.06	2.19858	1.13657	0.000349889	0.0032113	Up	27.1599	22.4392	35.1609	80.9376	47.6191	55.2868	GeneID:18778549	Anthocyanidin reductase ((2S)-flavan-3-ol-forming)	GO:0009813,GO:0016491,GO:0016616,GO:0033729,GO:0050662	flavonoid biosynthetic process|oxidoreductase activity|oxidoreductase activity, acting on the CH-OH group of donors, NAD or NADP as acceptor|anthocyanidin reductase activity|coenzyme binding	ko00941	Flavonoid biosynthesis
LOC18778552	118.895	173.229	64.5607	0.372689	-1.42395	2.75587e-06	4.66039e-05	Down	5.27287	7.01909	4.3918	2.27667	1.64376	2.16227	GeneID:18778552	Cytochrome b561 domain-containing protein At4g18260	GO:0016021,GO:0046872,GO:0055114	integral component of membrane|metal ion binding|oxidation-reduction process
LOC18778601	181.315	28.5057	334.125	11.7214	3.55107	2.48874e-18	2.64313e-16	Up	0.972556	0.768283	1.08726	9.94028	13.3469	9.11635	GeneID:18778601	Cytochrome P450 716B1	GO:0004497,GO:0005506,GO:0016021,GO:0016705,GO:0020037	monooxygenase activity|iron ion binding|integral component of membrane|oxidoreductase activity, acting on paired donors, with incorporation or reduction of molecular oxygen|heme binding	ko00830	Retinol metabolism
LOC18778604	12562.5	18740.5	6384.54	0.340682	-1.5535	1.13156e-12	6.17852e-11	Down	532.488	428.546	569.349	211.951	150.92	150.047	GeneID:18778604	Berberine bridge enzyme-like 17	GO:0005576,GO:0005618,GO:0016491,GO:0071949	extracellular region|cell wall|oxidoreductase activity|FAD binding
LOC18778613	291.966	99.0097	484.923	4.89774	2.29212	3.12205e-21	4.53731e-19	Up	2.55969	3.79136	2.31238	13.6654	12.5583	15.1703	GeneID:18778613	Glucose-6-phosphate/phosphate translocator 2, chloroplastic	GO:0005315,GO:0005774,GO:0009624,GO:0009643,GO:0009744,GO:0009749,GO:0010109,GO:0015120,GO:0015152,GO:0015713,GO:0015714,GO:0015760,GO:0015979,GO:0016021,GO:0031969,GO:0035436,GO:0071917,GO:0080167	inorganic phosphate transmembrane transporter activity|vacuolar membrane|response to nematode|photosynthetic acclimation|response to sucrose|response to glucose|regulation of photosynthesis|phosphoglycerate transmembrane transporter activity|glucose-6-phosphate transmembrane transporter activity|phosphoglycerate transmembrane transport|phosphoenolpyruvate transport|glucose-6-phosphate transport|p…
LOC18778639	12973.3	18516	7430.66	0.401311	-1.31721	6.72756e-07	1.32421e-05	Down	847.106	745.603	1027.82	385.043	224.681	425.155	GeneID:18778639	Stem-specific protein TSJT1
LOC18778643	9658.39	2661.21	16655.6	6.25866	2.64585	4.36529e-06	7.12641e-05	Up	100.571	113.736	117.349	470.129	925.578	621.439	GeneID:18778643	Probable 2-oxoglutarate-dependent dioxygenase AOP1	GO:0016020,GO:0046872,GO:0051213	membrane|metal ion binding|dioxygenase activity
LOC18778652	14.4842	24.884	4.08438	0.164137	-2.60703	0.00146977	0.0108764	Down	1.63065	0.907562	1.34923	0.322813	0.10511	0.204394	GeneID:18778652	Chlorophyll a-b binding protein 40, chloroplastic	GO:0009522,GO:0009523,GO:0009535,GO:0009765,GO:0016021,GO:0016168,GO:0018298,GO:0046872	photosystem I|photosystem II|chloroplast thylakoid membrane|photosynthesis, light harvesting|integral component of membrane|chlorophyll binding|protein-chromophore linkage|metal ion binding	ko00196	Photosynthesis - antenna proteins
LOC18778664	336.207	473.948	198.466	0.418749	-1.25584	1.16607e-06	2.1589e-05	Down	20.0386	19.4353	13.794	6.09062	9.33838	6.2605	GeneID:18778664	Codeine O-demethylase	GO:0008168,GO:0046872,GO:0097295,GO:0102803,GO:0102805	methyltransferase activity|metal ion binding|morphine biosynthetic process|thebane O-demethylase activity|codeine O-demethylase activity
LOC18778665	810.264	478.58	1141.95	2.38612	1.25466	2.38891e-06	4.10082e-05	Up	8.09364	8.94208	10.4013	16.6786	23.9759	23.199	GeneID:18778665	Polyphenol oxidase latent form, chloroplastic	GO:0004097,GO:0009543,GO:0046148,GO:0046872	catechol oxidase activity|chloroplast thylakoid lumen|pigment biosynthetic process|metal ion binding	ko00950,ko00350	Isoquinoline alkaloid biosynthesis|Tyrosine metabolism
LOC18778668	1168.33	1600.51	736.161	0.459955	-1.12044	1.37436e-09	4.75225e-08	Down	50.3998	43.4231	43.8083	17.8783	25.4309	18.4112	GeneID:18778668	Metal tolerance protein 10	GO:0005774,GO:0008324,GO:0016021	vacuolar membrane|cation transmembrane transporter activity|integral component of membrane
LOC18778682	585.968	896.186	275.75	0.307693	-1.70044	0.000111682	0.00121071	Down	8.97597	7.62874	13.2857	4.10472	1.8981	3.09037	GeneID:18778682	Probable leucine-rich repeat receptor-like serine/threonine-protein kinase At3g14840
LOC18778686	515.611	326.371	704.852	2.15966	1.11081	0.00394879	0.024269	Up	9.30091	14.0802	11.6502	27.8767	15.3599	30.9876	GeneID:18778686	Putative uncharacterized hydrolase C7D4.05	GO:0005634,GO:0005829,GO:0016791	nucleus|cytosol|phosphatase activity
LOC18778688	8.02918	15.7189	0.339503	0.0215985	-5.53293	0.00018223	0.00183741	Down	0.717853	0.427277	0.345527	0.032567	0	0	GeneID:18778688	Receptor-like protein EIX2	GO:0005886,GO:0016021,GO:0050832	plasma membrane|integral component of membrane|defense response to fungus
LOC18778712	21.4698	8.76398	34.1757	3.89956	1.96331	0.00216904	0.0149254	Up	0.319612	0.326122	0.46152	1.39199	1.23225	1.61124	GeneID:18778712	Calcium-binding protein KRP1	GO:0005509,GO:0080167	calcium ion binding|response to karrikin
LOC18778730	39.2013	7.85725	70.5454	8.97838	3.16646	0.00708741	0.0388767	Up	0.103678	0.185132	0.353862	3.49945	0.964855	1.28656	GeneID:18778730	Putative FBD-associated F-box protein At1g61330
LOC18778767	48.1582	12.0066	84.3097	7.02194	2.81187	2.04639e-08	5.74924e-07	Up	0.166224	0.36345	0.37407	1.39619	2.2983	2.48016	GeneID:18778767	Inositol transporter 4	GO:0005351,GO:0005355,GO:0005886,GO:0005887,GO:0008645	carbohydrate:proton symporter activity|glucose transmembrane transporter activity|plasma membrane|integral component of plasma membrane|hexose transmembrane transport
LOC18778780	39.4224	13.0433	65.8015	5.04485	2.33481	0.00791928	0.0422967	Up	0.641274	0.153961	0.752686	3.61435	0.842525	3.3157	GeneID:18778780	Probable F-box protein At4g22030
LOC18778800	196.056	119.486	272.625	2.28165	1.19007	4.20998e-06	6.89433e-05	Up	3.89713	5.65466	4.0176	8.99255	11.7882	9.35407	GeneID:18778800	Probable glutathione S-transferase	GO:0004364,GO:0009734	glutathione transferase activity|auxin-activated signaling pathway	ko00982,ko00480,ko00980	Drug metabolism - cytochrome P450|Glutathione metabolism|Metabolism of xenobiotics by cytochrome P450
LOC18778811	237.335	153.198	321.473	2.09842	1.0693	0.00185819	0.0132584	Up	5.89914	6.89166	7.94599	12.0549	11.6391	18.8755	GeneID:18778811
LOC18778817	2048.85	1348.64	2749.06	2.0384	1.02743	6.68052e-09	2.06274e-07	Up	40.3241	43.0357	48.5085	99.9132	76.7447	87.1657	GeneID:18778817	Fumarylacetoacetase	GO:0004334,GO:0005829,GO:0006559,GO:0006572,GO:0008219,GO:0046872,GO:1902000	fumarylacetoacetase activity|cytosol|L-phenylalanine catabolic process|tyrosine catabolic process|cell death|metal ion binding|homogentisate catabolic process	ko00350,ko00643	Tyrosine metabolism|Styrene degradation
LOC18778829	31.1734	52.0714	10.2753	0.197331	-2.34131	7.18348e-05	0.000830521	Down	0.437699	0.86055	0.470876	0.162732	0.102189	0.0772773	GeneID:18778829	Receptor-like protein EIX2	GO:0005886,GO:0016021,GO:0050832	plasma membrane|integral component of membrane|defense response to fungus
LOC18778840	8080.15	3585.4	12574.9	3.50725	1.81034	1.78068e-25	3.37438e-23	Up	120.348	96.4388	127.152	424.572	352.393	407.063	GeneID:18778840	Ferredoxin--NADP reductase, root isozyme, chloroplastic	GO:0004324,GO:0009507,GO:0015979	ferredoxin-NADP+ reductase activity|chloroplast|photosynthesis	ko00195	Photosynthesis
LOC18778849	7.57767	0.631632	14.5237	22.994	4.52318	0.000912578	0.00728894	Up	0	0.0639444	0	0.477636	0.733174	0.194415	GeneID:18778849	Pectinesterase QRT1	GO:0005576,GO:0005618,GO:0030599,GO:0042545,GO:0045330,GO:0045490	extracellular region|cell wall|pectinesterase activity|cell wall modification|aspartyl esterase activity|pectin catabolic process	ko00040,ko00500	Pentose and glucuronate interconversions|Starch and sucrose metabolism
LOC18778860	318.731	635.428	2.03305	0.00319949	-8.28794	1.66207e-99	4.58946e-96	Down	17.4804	19.9068	15.0795	0.141614	0	0.0268995	GeneID:18778860	BES1/BZR1 homolog protein 4	GO:0003677,GO:0003700,GO:0006351,GO:0006355,GO:0009742	DNA binding|DNA-binding transcription factor activity|transcription, DNA-templated|regulation of transcription, DNA-templated|brassinosteroid mediated signaling pathway
LOC18778906	18.8233	0	37.6466	Inf	Inf	1.6714e-11	7.74738e-10	Up	0	0	0	0.963531	1.09301	1.26935	GeneID:18778906	Protein SUPPRESSOR OF GENE SILENCING 3	GO:0031047,GO:0048471,GO:0050688	gene silencing by RNA|perinuclear region of cytoplasm|regulation of defense response to virus
LOC18778908	16.5153	29.6555	3.37518	0.113813	-3.13526	0.00230264	0.015716	Down	0.501255	1.82666	1.05282	0.194919	0	0.185124	GeneID:18778908	Feruloyl CoA ortho-hydroxylase 2	GO:0009805,GO:0010421,GO:0046872,GO:0051213	coumarin biosynthetic process|hydrogen peroxide-mediated programmed cell death|metal ion binding|dioxygenase activity
LOC18778917	8.33857	15.335	1.34213	0.0875208	-3.51423	0.00304528	0.0196732	Down	0.223341	0.45578	0.674328	0	0	0.115478	GeneID:18778917	Homeobox protein knotted-1-like LET6	GO:0005634,GO:0006355,GO:0043565	nucleus|regulation of transcription, DNA-templated|sequence-specific DNA binding
LOC18778923	174.882	108.412	241.351	2.22623	1.15461	0.00111919	0.00862893	Up	2.40006	2.54224	2.90458	4.28069	7.29328	5.43654	GeneID:18778923	LysM domain receptor-like kinase 3
LOC18778934	123.269	62.3399	184.197	2.95472	1.56302	1.88561e-07	4.2678e-06	Up	1.60822	1.39886	2.18729	4.50679	5.01923	5.50717	GeneID:18778934
LOC18778941	69.1237	42.457	95.7904	2.25617	1.17388	0.00620638	0.0348123	Up	1.56534	1.0966	0.490715	2.31488	1.66486	2.97168	GeneID:18778941	Cytochrome P450 710A11	GO:0004497,GO:0005506,GO:0016021,GO:0016125,GO:0016126,GO:0016705,GO:0020037,GO:0055114	monooxygenase activity|iron ion binding|integral component of membrane|sterol metabolic process|sterol biosynthetic process|oxidoreductase activity, acting on paired donors, with incorporation or reduction of molecular oxygen|heme binding|oxidation-reduction process	ko00100	Steroid biosynthesis
LOC18778952	45.5767	15.1682	75.9853	5.0095	2.32467	5.26682e-07	1.06488e-05	Up	0.43781	0.506291	0.459781	2.00211	2.26614	2.5957	GeneID:18778952	Bifunctional riboflavin kinase/FMN phosphatase	GO:0000287,GO:0003919,GO:0005524,GO:0008531,GO:0009231,GO:0009398,GO:0016787	magnesium ion binding|FMN adenylyltransferase activity|ATP binding|riboflavin kinase activity|riboflavin biosynthetic process|FMN biosynthetic process|hydrolase activity
LOC18778998	4256.3	5807.51	2705.1	0.465793	-1.10224	2.0261e-10	8.00868e-09	Down	128.649	114.273	127.512	55.4642	56.0425	57.3637	GeneID:18778998	Wall-associated receptor kinase 2
LOC18779022	920.588	597.313	1243.86	2.08243	1.05827	3.09416e-08	8.41167e-07	Up	11.6422	11.9148	9.3293	20.2706	24.082	22.4278	GeneID:18779022	Transcription factor TCP2	GO:0003700,GO:0005634,GO:0006355,GO:0009637,GO:0009965,GO:0030154,GO:0043565,GO:0045962,GO:0048366,GO:1903508,GO:2000306	DNA-binding transcription factor activity|nucleus|regulation of transcription, DNA-templated|response to blue light|leaf morphogenesis|cell differentiation|sequence-specific DNA binding|positive regulation of development, heterochronic|leaf development|positive regulation of nucleic acid-templated transcription|positive regulation of photomorphogenesis
LOC18779075	821.39	334.772	1308.01	3.90715	1.96612	1.62524e-06	2.91683e-05	Up	13.7955	30.6163	28.8307	113.256	61.1845	106.709	GeneID:18779075
LOC18779097	11.466	0.652858	22.2791	34.1255	5.09278	9.19158e-06	0.000138152	Up	0	0.0529489	0.054496	0.847508	1.32458	1.3952	GeneID:18779097	Probable glutathione S-transferase parC	GO:0004364,GO:0009734	glutathione transferase activity|auxin-activated signaling pathway	ko00982,ko00480,ko00980	Drug metabolism - cytochrome P450|Glutathione metabolism|Metabolism of xenobiotics by cytochrome P450
LOC18779101	80.6273	48.876	112.379	2.29926	1.20117	0.00053949	0.00465111	Up	1.26544	1.34616	1.55515	3.66443	3.06405	2.67287	GeneID:18779101
LOC18779105	458.076	734.358	181.794	0.247555	-2.01418	1.10311e-17	1.07146e-15	Down	44.8945	52.0794	35.7341	10.4702	10.4696	11.1209	GeneID:18779105	Protein PHLOEM PROTEIN 2-LIKE A9	GO:0030246	carbohydrate binding
LOC18779107	545.174	245.933	844.414	3.43351	1.77968	1.22212e-17	1.18112e-15	Up	2.92656	5.25215	5.24291	14.1142	15.7279	15.1674	GeneID:18779107	Cytochrome P450 CYP736A12	GO:0004497,GO:0005506,GO:0016021,GO:0016705,GO:0020037	monooxygenase activity|iron ion binding|integral component of membrane|oxidoreductase activity, acting on paired donors, with incorporation or reduction of molecular oxygen|heme binding
LOC18779111	207.248	335.918	78.5781	0.23392	-2.09591	1.07888e-06	2.01097e-05	Down	11.3959	15.7482	20.5432	4.05459	3.00625	3.89724	GeneID:18779111	Endochitinase EP3	GO:0000272,GO:0004568,GO:0005618,GO:0006032,GO:0006952,GO:0008061,GO:0009611,GO:0009617,GO:0010262,GO:0016998	polysaccharide catabolic process|chitinase activity|cell wall|chitin catabolic process|defense response|chitin binding|response to wounding|response to bacterium|somatic embryogenesis|cell wall macromolecule catabolic process	ko00520	Amino sugar and nucleotide sugar metabolism
LOC18779116	79.2516	130.619	27.8843	0.213479	-2.22784	0.000138657	0.00145737	Down	5.59894	3.22783	2.76356	0.701062	1.07188	0.636884	GeneID:18779116	Berberine bridge enzyme-like 26	GO:0005576,GO:0005618,GO:0009506,GO:0016491,GO:0071949	extracellular region|cell wall|plasmodesma|oxidoreductase activity|FAD binding
LOC18779136	6.50143	0	13.0029	Inf	Inf	0.000184304	0.00185445	Up	0	0	0	0.464199	0.45344	0.514352	GeneID:18779136	Wall-associated receptor kinase 3
LOC18779141	201.068	277.38	124.756	0.449766	-1.15275	7.14602e-06	0.000110766	Down	10.7067	9.85897	12.1843	6.09283	3.92807	4.47502	GeneID:18779141	Probable cytokinin riboside 5'-monophosphate phosphoribohydrolase LOGL5	GO:0005634,GO:0005829,GO:0009691,GO:0016799	nucleus|cytosol|cytokinin biosynthetic process|hydrolase activity, hydrolyzing N-glycosyl compounds
LOC18779144	468.911	5.62445	932.197	165.74	7.37278	9.27839e-117	4.48355e-113	Up	0.0431659	0.0660677	0.271993	21.2438	21.8992	19.2166	GeneID:18779144	Tyrosine-sulfated glycopeptide receptor 1
LOC18779148	69.9455	99.1695	40.7216	0.410626	-1.2841	0.000478656	0.00418261	Down	4.95876	4.53355	2.99958	1.38219	1.6455	1.96909	GeneID:18779148	Werner Syndrome-like exonuclease	GO:0003677,GO:0005634,GO:0008408,GO:0046872	DNA binding|nucleus|3'-5' exonuclease activity|metal ion binding
LOC18779160	139.02	208.085	69.9544	0.336181	-1.57269	6.45417e-08	1.6265e-06	Down	9.18125	8.68277	11.6174	2.34068	3.66781	3.65878	GeneID:18779160	Probable pre-mRNA-splicing factor ATP-dependent RNA helicase DEAH5			ko03040	Spliceosome
LOC18779161	10.4378	19.844	1.03162	0.0519865	-4.26572	0.000128571	0.00136546	Down	0.310652	0.475469	0.195745	0.0338242	0.0165201	0	GeneID:18779161	Receptor-like protein EIX1	GO:0005886,GO:0016021,GO:0050832	plasma membrane|integral component of membrane|defense response to fungus
LOC18779188	59.9172	36.1762	83.6581	2.31251	1.20946	0.00206354	0.0143631	Up	1.14991	0.782223	0.992932	2.47626	2.28297	1.87617	GeneID:18779188	Cytochrome P450 CYP72A219	GO:0004497,GO:0005506,GO:0016021,GO:0016705,GO:0020037	monooxygenase activity|iron ion binding|integral component of membrane|oxidoreductase activity, acting on paired donors, with incorporation or reduction of molecular oxygen|heme binding
LOC18779203	780.444	368.046	1192.84	3.24101	1.69644	4.70009e-08	1.22437e-06	Up	13.2825	7.4123	14.6194	30.3142	43.9649	37.6859	GeneID:18779203	Probable F-box protein At4g22030
LOC18779205	66.2392	89.9376	42.5409	0.473005	-1.08007	0.00466335	0.0276751	Down	2.05208	1.92144	2.89031	1.36688	0.59057	1.24827	GeneID:18779205	Glucan endo-1,3-beta-glucosidase 14	GO:0005576,GO:0005618,GO:0005634,GO:0005737,GO:0005975,GO:0006952,GO:0042973,GO:0046658,GO:0071555	extracellular region|cell wall|nucleus|cytoplasm|carbohydrate metabolic process|defense response|glucan endo-1,3-beta-D-glucosidase activity|anchored component of plasma membrane|cell wall organization
LOC18779274	136.34	32.8998	239.779	7.28816	2.86556	4.43574e-08	1.16334e-06	Up	0.351641	1.11862	0.69513	6.86916	5.19196	3.37964	GeneID:18779274	Wall-associated receptor kinase 2
LOC18779276	4.58768	0	9.17535	Inf	Inf	0.00245649	0.0165499	Up	0	0	0	0.265602	0.0864822	0.231234	GeneID:18779276	F-box/FBD/LRR-repeat protein At5g22660
LOC18779279	748.938	1124.49	373.384	0.332046	-1.59054	9.49662e-16	7.6166e-14	Down	29.5481	31.2079	31.6026	9.96215	10.0896	9.944	GeneID:18779279	Amino-acid permease BAT1	GO:0005313,GO:0005739,GO:0015180,GO:0015181,GO:0015185,GO:0015189,GO:0015812,GO:0016021,GO:0031966	L-glutamate transmembrane transporter activity|mitochondrion|L-alanine transmembrane transporter activity|arginine transmembrane transporter activity|gamma-aminobutyric acid transmembrane transporter activity|L-lysine transmembrane transporter activity|gamma-aminobutyric acid transport|integral component of membrane|mitochondrial membrane
LOC18779303	237.25	420.232	54.2677	0.129137	-2.95302	3.14441e-08	8.52431e-07	Down	13.1305	7.79359	7.63828	1.14467	1.41479	1.04277	GeneID:18779303	Beta-glucosidase 12	GO:0005576,GO:0005975,GO:0008422,GO:0102483	extracellular region|carbohydrate metabolic process|beta-glucosidase activity|scopolin beta-glucosidase activity	ko00940,ko00460,ko00500	Phenylpropanoid biosynthesis|Cyanoamino acid metabolism|Starch and sucrose metabolism
LOC18779307	135.497	74.5601	196.434	2.63457	1.39757	1.31237e-06	2.39989e-05	Up	1.61714	1.37149	1.96296	4.59627	3.97599	4.235	GeneID:18779307
LOC18779333	153.137	205.051	101.223	0.493647	-1.01845	0.000327316	0.0030261	Down	7.72656	7.45673	9.51332	3.19105	2.99565	5.74652	GeneID:18779333
LOC18779344	11.7696	1.93865	21.6005	11.142	3.47794	0.000324398	0.00300301	Up	0.108795	0.0370036	0.0761697	1.02663	0.809981	0.600025	GeneID:18779344	Receptor-like protein EIX1	GO:0005886,GO:0016021,GO:0050832	plasma membrane|integral component of membrane|defense response to fungus
LOC18779356	218.444	339.92	96.9683	0.285268	-1.80961	1.33952e-12	7.21213e-11	Down	10.5359	11.5775	10.245	2.6473	3.16059	3.19716	GeneID:18779356	Cytochrome P450 71D9	GO:0005506,GO:0016020,GO:0016709,GO:0020037	iron ion binding|membrane|oxidoreductase activity, acting on paired donors, with incorporation or reduction of molecular oxygen, NAD(P)H as one donor, and incorporation of one atom of oxygen|heme binding
LOC18779360	91.6688	166.509	16.8288	0.101068	-3.3066	8.00472e-19	8.9688e-17	Down	3.77403	2.84549	3.18245	0.0607272	0.435011	0.461405	GeneID:18779360	Tyrosine-sulfated glycopeptide receptor 1
LOC18779393	4490.55	2807.58	6173.52	2.19888	1.13677	4.54688e-06	7.39092e-05	Up	54.0613	39.5987	39.8728	121.256	80.7307	86.6282	GeneID:18779393	Phosphoenolpyruvate carboxylase, housekeeping isozyme	GO:0005829,GO:0006099,GO:0008964,GO:0009507,GO:0015977,GO:0015979,GO:0048046,GO:0048366	cytosol|tricarboxylic acid cycle|phosphoenolpyruvate carboxylase activity|chloroplast|carbon fixation|photosynthesis|apoplast|leaf development	ko00710,ko00720,ko00680,ko00620,ko01200	Carbon fixation in photosynthetic organisms|Carbon fixation pathways in prokaryotes|Methane metabolism|Pyruvate metabolism|Carbon metabolism
LOC18779417	347.188	548.485	145.891	0.265989	-1.91056	1.02688e-10	4.25935e-09	Down	24.4727	20.7854	15.7592	4.81005	4.62398	6.41743	GeneID:18779417
LOC18779428	73.4185	46.7259	100.111	2.14252	1.09931	0.0021549	0.0148651	Up	2.2285	2.61498	3.39349	6.79397	5.8662	4.66659	GeneID:18779428	Probable glutathione S-transferase parC	GO:0004364,GO:0009734	glutathione transferase activity|auxin-activated signaling pathway	ko00982,ko00480,ko00980	Drug metabolism - cytochrome P450|Glutathione metabolism|Metabolism of xenobiotics by cytochrome P450
LOC18779445	632.281	1003.1	261.462	0.260655	-1.93979	1.69876e-16	1.47907e-14	Down	11.9387	16.9957	14.8346	4.23817	3.99365	2.93	GeneID:18779445	TMV resistance protein N	GO:0005524,GO:0005737,GO:0007165,GO:0009626,GO:0043531	ATP binding|cytoplasm|signal transduction|plant-type hypersensitive response|ADP binding
LOC18779447	43.3838	61.7724	24.9951	0.404632	-1.30532	0.00382352	0.0236951	Down	1.57899	1.43697	1.16524	0.534353	0.544663	0.573698	GeneID:18779447	Tyrosine-sulfated glycopeptide receptor 1
LOC18779457	66.9582	38.7842	95.1321	2.45286	1.29446	0.000554616	0.00476444	Up	0.909278	1.05318	1.05814	2.59549	2.24782	2.41424	GeneID:18779457				ko00230,ko00240,ko00760	Purine metabolism|Pyrimidine metabolism|Nicotinate and nicotinamide metabolism
LOC18779459	495.788	314.287	677.289	2.155	1.10769	1.21046e-07	2.88851e-06	Up	9.66314	10.2922	6.47808	17.6701	20.0763	17.7677	GeneID:18779459	Protein DETOXIFICATION 40	GO:0005773,GO:0005774,GO:0006855,GO:0015238,GO:0015297,GO:0016021	vacuole|vacuolar membrane|drug transmembrane transport|drug transmembrane transporter activity|antiporter activity|integral component of membrane
LOC18779460	7559.12	716.624	14401.6	20.0965	4.32887	3.66968e-09	1.18416e-07	Up	51.316	17.6447	57.7827	569.983	1168.72	750.062	GeneID:18779460	Phytohormone-binding protein	GO:0006952,GO:0009607,GO:0009740	defense response|response to biotic stimulus|gibberellic acid mediated signaling pathway
LOC18779509	5.22438	10.4488	0	0	#NAME?	0.00128774	0.00971157	Down	0.181994	0.238759	0.436863	0	0	0	GeneID:18779509	Protein UNUSUAL FLORAL ORGANS	GO:0000151,GO:0004842,GO:0005634,GO:0006355,GO:0008134,GO:0009908,GO:0030154,GO:0031146	ubiquitin ligase complex|ubiquitin-protein transferase activity|nucleus|regulation of transcription, DNA-templated|transcription factor binding|flower development|cell differentiation|SCF-dependent proteasomal ubiquitin-dependent protein catabolic process
LOC18779515	50.5214	12.8549	88.188	6.86029	2.77827	1.27782e-09	4.47445e-08	Up	0.447453	0.138955	0.204308	1.77931	1.96568	1.56919	GeneID:18779515	Putative disease resistance protein RGA1	GO:0005524,GO:0006952,GO:0043531	ATP binding|defense response|ADP binding
LOC18779527	8.34626	0	16.6925	Inf	Inf	1.48716e-05	0.000211986	Up	0	0	0	0.416023	0.279387	0.543286	GeneID:18779527	(E,E)-alpha-farnesene synthase	GO:0000287,GO:0005737,GO:0010333,GO:0016740	magnesium ion binding|cytoplasm|terpene synthase activity|transferase activity
LOC18779528	236.755	137.58	335.929	2.44169	1.28788	1.52019e-07	3.56523e-06	Up	2.73793	2.25401	1.79708	6.13157	4.51691	5.59823	GeneID:18779528
LOC18779544	6.5054	0	13.0108	Inf	Inf	0.000183785	0.00185116	Up	0	0	0	0.33311	0.278905	0.271175	GeneID:18779544	Tyrosine-sulfated glycopeptide receptor 1
LOC18779596	15.9839	31.2626	0.705224	0.0225581	-5.47021	0.00234941	0.0159507	Down	0.215432	0.21982	0.741576	0	0.0254587	0	GeneID:18779596	Wall-associated receptor kinase 1
LOC18779607	127.724	222.937	32.5115	0.145833	-2.77761	0.000261288	0.00249774	Down	6.53219	3.29148	9.06197	1.28783	0.771943	0.667153	GeneID:18779607	Berberine bridge enzyme-like 17	GO:0005576,GO:0005618,GO:0016491,GO:0071949	extracellular region|cell wall|oxidoreductase activity|FAD binding
LOC18779612	99.4545	153.546	45.363	0.295436	-1.75908	1.05406e-07	2.53722e-06	Down	2.32705	1.91114	2.65245	0.741576	0.482925	0.777677	GeneID:18779612	G-type lectin S-receptor-like serine/threonine-protein kinase At4g27290
LOC18779616	301.633	442.874	160.391	0.362158	-1.46531	3.0694e-10	1.17482e-08	Down	8.05384	8.78594	9.19858	2.70752	2.88161	3.62691	GeneID:18779616	Diacylglycerol kinase 2	GO:0003951,GO:0004143,GO:0005524,GO:0005622,GO:0006952,GO:0007205,GO:0009409,GO:0009611,GO:0016021,GO:0035556,GO:0046872,GO:0048364,GO:0048366	NAD+ kinase activity|diacylglycerol kinase activity|ATP binding|intracellular|defense response|protein kinase C-activating G protein-coupled receptor signaling pathway|response to cold|response to wounding|integral component of membrane|intracellular signal transduction|metal ion binding|root development|leaf development	ko00564,ko04072,ko04070,ko00561	Glycerophospholipid metabolism|Phospholipase D signaling pathway|Phosphatidylinositol signaling system|Glycerolipid metabolism
LOC18779667	46.7145	85.917	7.512	0.0874332	-3.51568	4.55811e-12	2.31852e-10	Down	3.3986	3.21331	1.89918	0.237643	0.198973	0.290187	GeneID:18779667	Gibberellin 2-beta-dioxygenase	GO:0009686,GO:0045543,GO:0046872	gibberellin biosynthetic process|gibberellin 2-beta-dioxygenase activity|metal ion binding	ko00904	Diterpenoid biosynthesis
LOC18779668	76.2951	20.6281	131.962	6.39721	2.67744	4.23511e-07	8.7645e-06	Up	0.731106	0.411585	0.503038	2.30576	4.37057	3.57162	GeneID:18779668	Reticuline oxidase	GO:0009820,GO:0031410,GO:0050468,GO:0071949	alkaloid metabolic process|cytoplasmic vesicle|reticuline oxidase activity|FAD binding
LOC18779726	15.0912	2.6123	27.5702	10.554	3.39972	0.00079467	0.00646762	Up	0.055227	0.0563519	0.115997	0.511121	0.558012	1.28498	GeneID:18779726	Transcription factor MYB101	GO:0003700,GO:0005634,GO:0009555,GO:0009739,GO:0009740,GO:0009789,GO:0010468,GO:0030154,GO:0043068,GO:0043565,GO:0044212,GO:0045893,GO:0048235,GO:0080092,GO:0090406,GO:1901371,GO:1990019	DNA-binding transcription factor activity|nucleus|pollen development|response to gibberellin|gibberellic acid mediated signaling pathway|positive regulation of abscisic acid-activated signaling pathway|regulation of gene expression|cell differentiation|positive regulation of programmed cell death|sequence-specific DNA binding|transcription regulatory region DNA binding|positive regulation of tran…
LOC18779735	30.5549	13.8642	47.2456	3.40773	1.76881	0.00104295	0.00813854	Up	0.568636	0.335916	0.408592	1.56414	1.40056	1.42364	GeneID:18779735	Ribonuclease 3-like protein 2	GO:0003723,GO:0004525,GO:0005634,GO:0005737,GO:0006364,GO:0016442,GO:0030422,GO:0046872	RNA binding|ribonuclease III activity|nucleus|cytoplasm|rRNA processing|RISC complex|production of siRNA involved in RNA interference|metal ion binding
LOC18779761	259.673	440.643	78.7035	0.178611	-2.48511	5.18275e-08	1.33215e-06	Down	19.6928	11.9708	13.3022	2.31613	1.19978	4.36615	GeneID:18779761	Malate dehydrogenase, cytoplasmic	GO:0005737,GO:0005975,GO:0006099,GO:0006108,GO:0030060	cytoplasm|carbohydrate metabolic process|tricarboxylic acid cycle|malate metabolic process|L-malate dehydrogenase activity	ko00710,ko01200,ko00630,ko00620,ko00020,ko00270	Carbon fixation in photosynthetic organisms|Carbon metabolism|Glyoxylate and dicarboxylate metabolism|Pyruvate metabolism|Citrate cycle (TCA cycle)|Cysteine and methionine metabolism
LOC18779776	4.44459	8.88917	0	0	#NAME?	0.007624	0.0411126	Down	0.233633	0.556248	1.39036	0	0	0	GeneID:18779776	Putative germin-like protein 2-1	GO:0005618,GO:0030145,GO:0045735,GO:0048046	cell wall|manganese ion binding|nutrient reservoir activity|apoplast
LOC18779789	197.774	101.132	294.416	2.9112	1.54162	3.44148e-09	1.11799e-07	Up	4.67556	3.77391	2.74824	10.0676	11.1703	10.572	GeneID:18779789	Codeine O-demethylase	GO:0008168,GO:0046872,GO:0097295,GO:0102803,GO:0102805	methyltransferase activity|metal ion binding|morphine biosynthetic process|thebane O-demethylase activity|codeine O-demethylase activity
LOC18779799	18.64	6.53204	30.748	4.70726	2.23489	0.00128944	0.00972062	Up	0.201384	0.0513714	0.264363	0.849668	0.669335	0.885066	GeneID:18779799	Protein ACCELERATED CELL DEATH 6	GO:0005887,GO:0008219,GO:0009416,GO:0009615,GO:0009617,GO:0009751,GO:0009816,GO:0016020,GO:0016567,GO:0030176,GO:0050826,GO:0071446,GO:1900150,GO:1900426,GO:1902290,GO:2000031	integral component of plasma membrane|cell death|response to light stimulus|response to virus|response to bacterium|response to salicylic acid|defense response to bacterium, incompatible interaction|membrane|protein ubiquitination|integral component of endoplasmic reticulum membrane|response to freezing|cellular response to salicylic acid stimulus|regulation of defense response to fungus|positive…
LOC18779811	9345.32	6056.04	12634.6	2.08628	1.06093	3.6881e-10	1.39233e-08	Up	194.273	180.039	253.341	405.926	438.03	438.463	GeneID:18779811	Protein ATAF2	GO:0003677,GO:0005634,GO:0008361,GO:0009416,GO:0009611,GO:0009620,GO:0009744,GO:0009751,GO:0009753,GO:0009793,GO:0010099,GO:0010150,GO:0016032,GO:0043424,GO:0045892,GO:0045893	DNA binding|nucleus|regulation of cell size|response to light stimulus|response to wounding|response to fungus|response to sucrose|response to salicylic acid|response to jasmonic acid|embryo development ending in seed dormancy|regulation of photomorphogenesis|leaf senescence|viral process|protein histidine kinase binding|negative regulation of transcription, DNA-templated|positive regulation of t…
LOC18779816	19.855	7.41451	32.2954	4.35571	2.12291	0.00866547	0.0453916	Up	0.431109	0.967757	0.633841	2.2531	1.74237	4.63641	GeneID:18779816	Berberine bridge enzyme-like 1	GO:0005576,GO:0005794,GO:0005886,GO:0009505,GO:0016899,GO:0071949	extracellular region|Golgi apparatus|plasma membrane|plant-type cell wall|oxidoreductase activity, acting on the CH-OH group of donors, oxygen as acceptor|FAD binding
LOC18779826	541.662	801.338	281.985	0.351893	-1.50679	3.5778e-13	2.09562e-11	Down	9.7152	7.47294	8.09941	3.25478	2.46929	3.00879	GeneID:18779826	B2 protein
LOC18779832	20.3881	9.64818	31.1281	3.22631	1.68989	0.00965312	0.0493351	Up	0.344887	0.508317	0.321951	1.0431	1.18196	1.46622	GeneID:18779832	Thaumatin-like protein 1	GO:0005576	extracellular region
LOC18779861	3.60669	0	7.21339	Inf	Inf	0.00973519	0.0496233	Up	0	0	0	0.253895	0.144673	0.0401895	GeneID:18779861	F-box/kelch-repeat protein At3g06240
LOC18779862	24.9818	43.5344	6.42914	0.147679	-2.75946	0.000222223	0.00216827	Down	1.53701	0.632008	0.987759	0.124889	0.0487978	0.284672	GeneID:18779862	Anthocyanidin 3-O-glucoside 2''-O-glucosyltransferase	GO:0009718,GO:0016758,GO:0043473,GO:0102455	anthocyanin-containing compound biosynthetic process|transferase activity, transferring hexosyl groups|pigmentation|anthocyanidin 3-O-glucoside 2''-O-glucosyltransferase activity
LOC18779879	112.01	51.9874	172.033	3.30913	1.72645	4.19396e-08	1.10443e-06	Up	0.720433	1.38474	0.668612	3.52075	2.60164	2.84139	GeneID:18779879	G-type lectin S-receptor-like serine/threonine-protein kinase At4g27290
LOC18779885	208.164	87.5341	328.795	3.75619	1.90927	7.8342e-12	3.8336e-10	Up	3.24889	0.695094	3.27435	8.95769	7.77475	9.99773	GeneID:18779885	Rho GTPase-activating protein 7	GO:0005096,GO:0005737,GO:0005886,GO:0007165,GO:0009535,GO:0009920	GTPase activator activity|cytoplasm|plasma membrane|signal transduction|chloroplast thylakoid membrane|cell plate formation involved in plant-type cell wall biogenesis
LOC18779900	45.0612	2.86573	87.2567	30.4483	4.92829	1.23631e-14	8.59588e-13	Up	0.174581	0.106882	0.0366685	4.02983	2.04249	3.43015	GeneID:18779900	TMV resistance protein N	GO:0005524,GO:0005737,GO:0007165,GO:0009626,GO:0043531	ATP binding|cytoplasm|signal transduction|plant-type hypersensitive response|ADP binding
LOC18779916	393.372	531.587	255.156	0.479989	-1.05893	8.78511e-07	1.66641e-05	Down	10.2464	9.78743	8.98831	3.93757	5.38484	4.25614	GeneID:18779916	G-type lectin S-receptor-like serine/threonine-protein kinase At1g11410
LOC18779934	645.568	883.646	407.49	0.461146	-1.11671	4.74992e-05	0.000578885	Down	13.4386	19.8519	19.8738	7.54338	6.39953	10.0497	GeneID:18779934	Protein ACCELERATED CELL DEATH 6	GO:0005887,GO:0008219,GO:0009416,GO:0009615,GO:0009617,GO:0009751,GO:0009816,GO:0016020,GO:0016567,GO:0030176,GO:0050826,GO:0071446,GO:1900150,GO:1900426,GO:1902290,GO:2000031	integral component of plasma membrane|cell death|response to light stimulus|response to virus|response to bacterium|response to salicylic acid|defense response to bacterium, incompatible interaction|membrane|protein ubiquitination|integral component of endoplasmic reticulum membrane|response to freezing|cellular response to salicylic acid stimulus|regulation of defense response to fungus|positive…
LOC18779958	48.7848	0.315816	97.2538	307.945	8.26653	1.81121e-25	3.39892e-23	Up	0	0.041685	0	4.31467	4.86642	3.1262	GeneID:18779958	Probable glutathione S-transferase	GO:0004364,GO:0009734	glutathione transferase activity|auxin-activated signaling pathway	ko00982,ko00480,ko00980	Drug metabolism - cytochrome P450|Glutathione metabolism|Metabolism of xenobiotics by cytochrome P450
LOC18780021	5534.21	2820.4	8248.01	2.92441	1.54814	9.64363e-06	0.000144051	Up	122.909	146.619	229.796	368.23	576.336	481.287	GeneID:18780021	Calcium-binding protein KRP1	GO:0005509,GO:0080167	calcium ion binding|response to karrikin
[truncated: 959 more rows]

## Sheet: KNO3_M-vs-KCL_M-diff-q-val-0.05
gene_id	BaseMean	BaseMean_control_KCL_M	BaseMean_case_KNO3_M	FoldChange	log2FoldChange	p-value	q-value	Regulation	Expression_KCL_M1	Expression_KCL_M2	Expression_KCL_M3	Expression_KNO3_M1	Expression_KNO3_M2	Expression_KNO3_M3	gene_Dbxref	description	GO_id	GO_term	pathway	pathway_description
[truncated: 146 more rows]

[truncated: 2 more sheets: KNO3_S-vs-KCL_S-diff-q-val-0.05, KNO3_S-vs-KNO3_M-diff-q-val-0.0]
